# Supplementary material for: Cohesin mutations are synthetic lethal with stimulation of WNT signaling
Source: eLife journal article supplement (doi:10.7554/elife.61405), 2020-12-07

**A**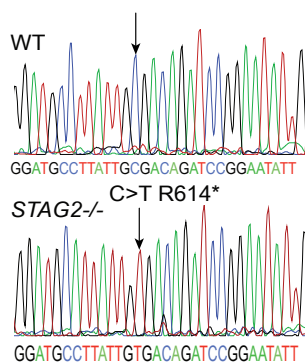**D**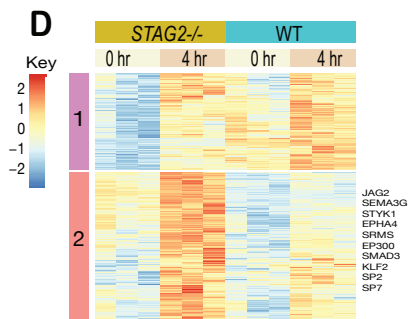**E**

| Pathway                                       | FDR    | Genes in the overlap |
|-----------------------------------------------|--------|----------------------|
| CTTTGT LEF1 Q2                                | 0.0000 | 42                   |
| TCF7 TARGET GENES                             | 0.0000 | 39                   |
| REACTOME RNA POLYMERASE II TRANSCRIPTION      | 0.0003 | 26                   |
| KEGG WNT SIGNALING PATHWAY                    | 0.0003 | 9                    |
| REACTOME METABOLISM OF LIPIDS                 | 0.0003 | 18                   |
| REACTOME CELL CYCLE                           | 0.0003 | 17                   |
| REACTOME MEMBRANE TRAFFICKING                 | 0.0017 | 15                   |
| REACTOME DOWNREGULATION OF SMAD2 3 SMAD4      |        |                      |
| TRANSCRIPTIONAL ACTIVITY                      | 0.0020 | 4                    |
| REACTOME TRANSCRIPTIONAL REGULATION OF WHITE  |        |                      |
| ADIPOCYTE DIFFERENTIATION                     | 0.0021 | 6                    |
| REACTOME ORGANELLE BIOGENESIS AND MAINTENANCE | 0.0021 | 10                   |
| PID NOTCH PATHWAY                             | 0.0034 | 5                    |
| REACTOME FOXO MEDIATED TRANSCRIPTION          | 0.0049 | 5                    |

**B**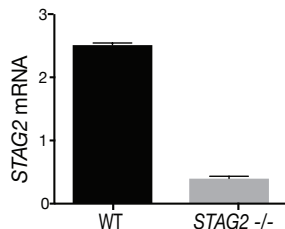**F**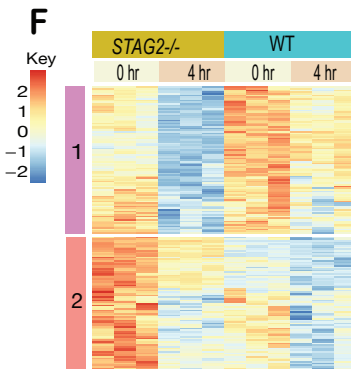**G**

| Pathway                                                  | FDR    | Genes in the overlap |
|----------------------------------------------------------|--------|----------------------|
| REACTOME METABOLISM OF LIPIDS                            | 0.0018 | 15                   |
| REACTOME PHOSPHOLIPID METABOLISM                         | 0.0290 | 7                    |
| KEGG AMINO SUGAR AND NUCLEOTIDE SUGAR METABOLISM         | 0.0290 | 4                    |
| KEGG FC GAMMA R MEDIATED PHAGOCYTOSIS                    | 0.0320 | 5                    |
| REACTOME REGULATION OF TP53 ACTIVITY THROUGH METHYLATION | 0.0320 | 3                    |

**C**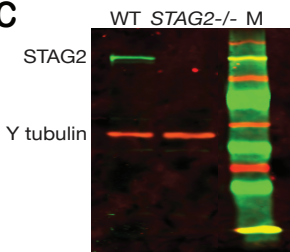

Supplement: supp [file elife_poa_e61405_Figure_6_figure_supplement_2.pdf › elife_poa_e61405_Figure_6_figure_supplement_2.pdf]
