# Supplementary material for: Cohesin mutations are synthetic lethal with stimulation of WNT signaling
Source: PubMed Central journal article supplement (PMC7746233; doi:10.7554/elife.61405), 2020-12-07
Supplement: elife-61405-fig5-data1.pdf [file elife-61405-fig5-data1.pdf]

### Figure 5 - Source Data 1

Chameleon Duo Stain

Protein ladder

200 kDa  
160 kDa  
125 kDa  
90 kDa  
70 kDa

pbeta-catenin (Ser33/37/Thr41) - 92 kDa

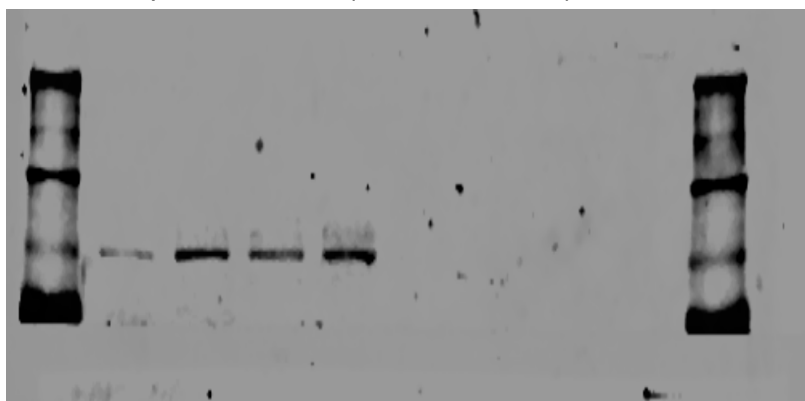

Figure 5A (top)

Total beta-catenin - 92 kDa

90 kDa  
(reprobe)

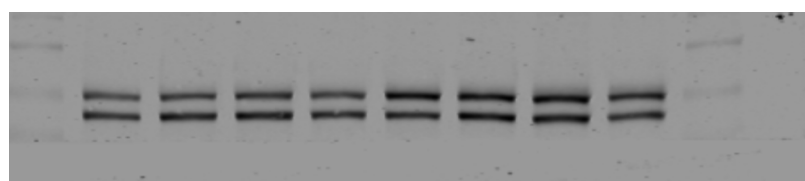

Figure 5A (middle)

Gamma-tubulin - 52 kDa

50 kDa

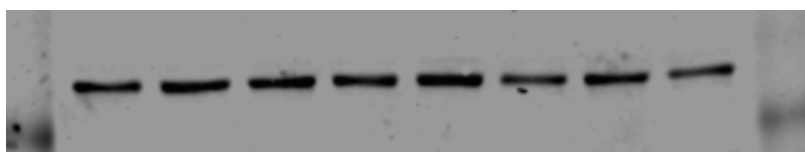

Figure 5A (bottom)

Chameleon Duo Stain

Protein ladder

200 kDa  
160 kDa  
125 kDa  
90 kDa  
70 kDa

pbeta-catenin (Ser675) - 92 kDa

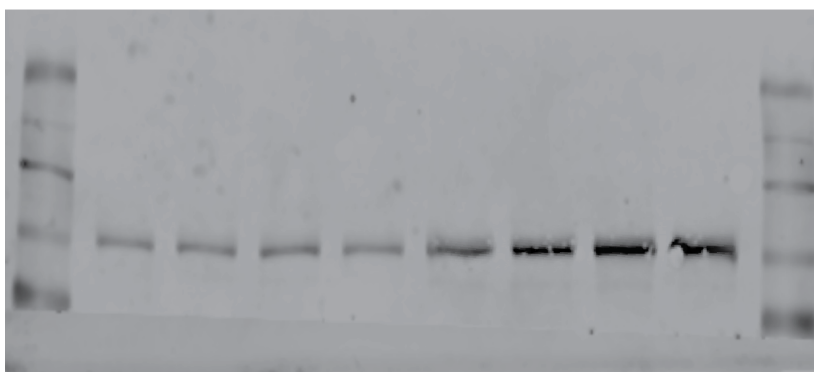

Figure 5B (top)

Total beta-catenin - 92 kDa

90 kDa  
(reprobe)

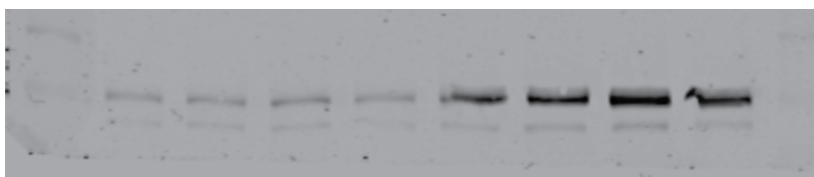

Figure 5B (middle)

Gamma-tubulin - 52 kDa

50 kDa

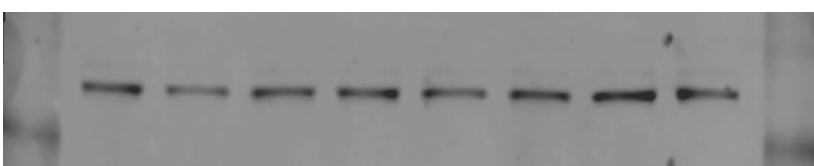

Figure 5B (bottom)
