# Supplementary material for: Cohesin mutations are synthetic lethal with stimulation of WNT signaling
Source: PubMed Central journal article supplement (PMC7746233; doi:10.7554/elife.61405), 2020-12-07
Supplement: elife-61405-fig5-data3.pdf [file elife-61405-fig5-data3.pdf]

### Figure 5 - Source Data 3

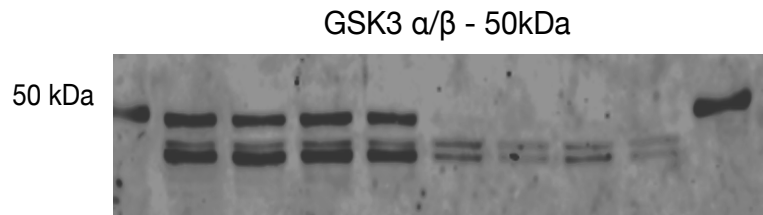

**Figure 5S1A (top)**

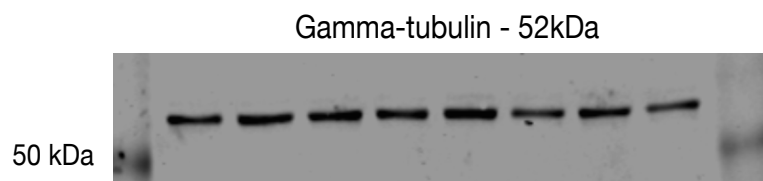

**Figure 5S1A (bottom)**

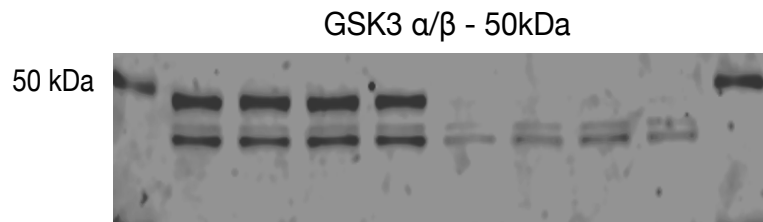

**Figure 5S1B (top)**

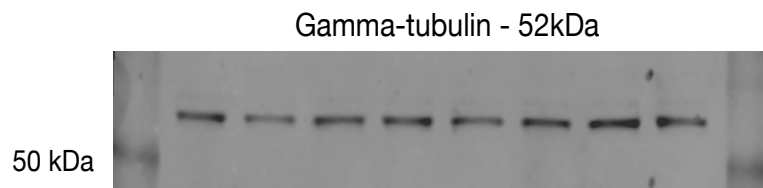

**Figure 5S1B (bottom)**
