# Supplementary material for: Cohesin mutations are synthetic lethal with stimulation of WNT signaling
Source: PubMed Central journal article supplement (PMC7746233; doi:10.7554/elife.61405), 2020-12-07
Supplement: elife-61405-fig5-data4.pdf [file elife-61405-fig5-data4.pdf]

# Figure 5 - Source Data 4

pβ-catenin (Ser33/37/Thr41) - 92 kDa

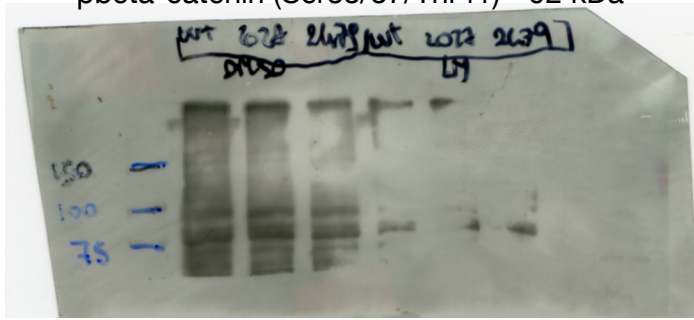

Figure 5S2A (top)

Total β-catenin - 92 kDa

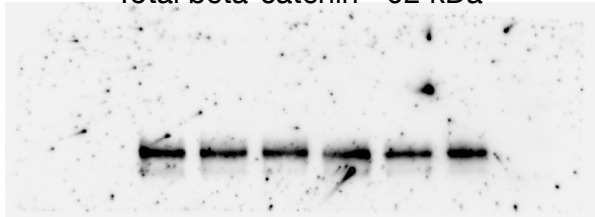

Figure 5S2A (middle)

Gamma-tubulin - 52 kDa

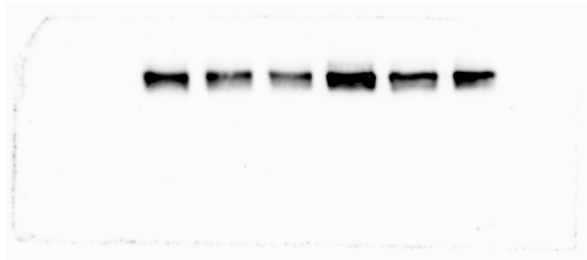

Figure 5S2A (bottom)

pβ-catenin (Ser675) - 92 kDa

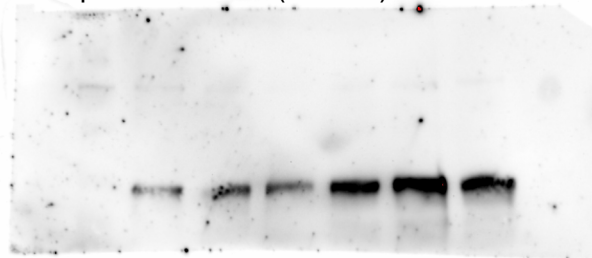

Figure 5S2B (top)

Total β-catenin - 92 kDa

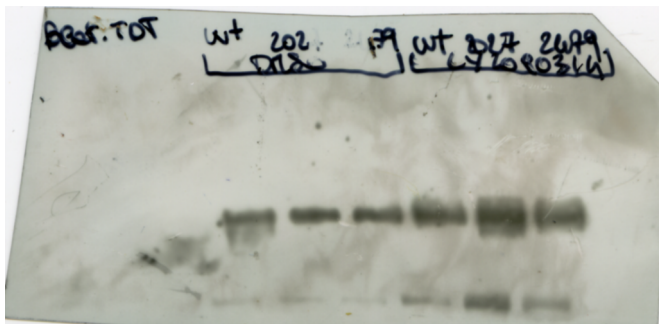

Figure 5S2B (middle)

Gamma-tubulin - 52 kDa

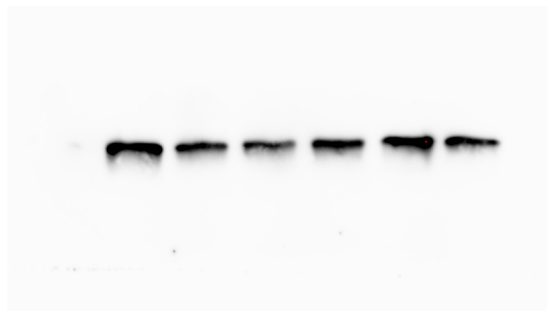

Figure 5S2B (bottom)
