# Supplementary material for: Cohesin mutations are synthetic lethal with stimulation of WNT signaling
Source: eLife. 2020 Dec 7;9:e61405. doi: 10.7554/eLife.61405 (PMC7746233; doi:10.7554/eLife.61405)
Supplement: Figure 2—source data 1. [file elife-61405-fig2-data1.xlsx]

## Sheet: Fig2a
Time(h)	WT			RAD21+/-			SMC3+/-			STAG2-/-
0	4	4	5	4	3	5	5	4	5	5.06	2	4
24	18	10	21	9	12	13	7	10	9	15	10	18
48	72	87	76	46	51	57	30	26	38	60	78	80
72	96	90	89	78	75	82	62	50	51	91	87	80
96	99	98	97	98	96	95	92	82	87	98	97	87
120	100	99	98	100	94	98	98	91	89	100	98	80

## Sheet: Fig2d
Cell lines	Normal		Partial loss		Complete loss
WT	85	87	15	13	0	0
RAD21+/-	81	78	18	21	1	1
SMC3+/-	87	85	13	15	0	0
STAG2-/-	33	29	61	64	6	7

## Sheet: Fig2f
Cell lines	Nuclear area (uM2)
WT	203.2	211.34	210.5	227.1	215.56
RAD21+/-	216.6	218.4	217.02	217.5	228.3
SMC3+/-	264.3	266.01	289.2	261.5	271.2
STAG2-/-	199.75	202.4	210.1	207.4	208.4

## Sheet: Fig2g
Cell lines	Micronuclei per cell (%)
WT	0.096	0.087	0.078	0.081	0.075
RAD21+/-	0.213	0.078	0.212	0.121	0.15
SMC3+/-	0.216	0.162	0.224	0.215	0.214
STAG2-/-	0.104	0.127	0.068	0.074	0.071
