# Supplementary material for: Cohesin mutations are synthetic lethal with stimulation of WNT signaling
Source: eLife. 2020 Dec 7;9:e61405. doi: 10.7554/eLife.61405 (PMC7746233; doi:10.7554/eLife.61405)
Supplement: Figure 3—source data 1. [file elife-61405-fig3-data1.xlsx]

## Sheet: Fig3b
No. FBL spots per cell
Cell lines	DMSO			ActD 8 nM
WT	2.695	2.174	2.345	2.574	2.412	2.63
RAD21+/-	2.15	2.13175	2.125	8.436	9.97	7.2
SMC3+/-	1.897	2.1775	2.361	9.71	8.436	8.218
STAG2-/-	2.14	2.67425	2.425	5.18	7.117	3.41
yH2AX intensity per cell (R.U.)
Cell lines	DMSO			ActD 8 nM
WT	1553.95	1540.88	1590.65	1976.68	1854.18	2040.21
RAD21+/-	2023.08	1881.49	1901.51	3606.27	3587.14	4009.32
SMC3+/-	2228.93	2023.08	2109.08	4248.18	3806.27	4250.32
STAG2-/-	1421.08	1547.25	1609.35	1483.41	1742.77	1454.02
p53 intensity per cell (R.U.)
Cell lines	DMSO			ActD 8 nM
WT	2102143	2032231	2213033	5112430	4984240	4712109
RAD21+/-	2817526	2402123	2620181	5282932	5720712	5513098
SMC3+/-	4610515	4722681	5014271	14910262	10165112	8171210
STAG2-/-	2654343	3245311	3249654	5098743	4934087	4398635
