# Supplementary material for: Cohesin mutations are synthetic lethal with stimulation of WNT signaling
Source: eLife. 2020 Dec 7;9:e61405. doi: 10.7554/eLife.61405 (PMC7746233; doi:10.7554/eLife.61405)
Supplement: Figure 4—source data 1. [file elife-61405-fig4-data1.xlsx]

## Sheet: Fig4_source_data_1
cell_line	treatment	time_point	concentration	cell_count	cell_count__time0	cell_count__ctrl
MCF10A	GAMBOGIC ACID	48	5000	3590	345.643	3123.45
MCF10A	PYROGALLIN	48	5000	2367	345.643	3123.45
MCF10A	CIPROFLOXACIN	48	100	3484	345.643	3123.45
MCF10A	4-PHENYLBUTYRIC ACID	48	1000	2975	345.643	3123.45
MCF10A	ATORVASTATIN CALCIUM	48	10	3046	345.643	3123.45
MCF10A	PECTOLINARIN	48	5000	3321	345.643	3123.45
MCF10A	PALMATINE	48	10	3925	345.643	3123.45
MCF10A	CACODYLIC ACID	48	100	2992	345.643	3123.45
MCF10A	METRONIDAZOLE	48	1	3570	345.643	3123.45
MCF10A	HYDROQUININE HYDROBROMIDE HYDRATE	48	100	3331	345.643	3123.45
MCF10A	STAVUDINE	48	5000	3778	345.643	3123.45
MCF10A	NITROMIDE	48	10	3340	345.643	3123.45
MCF10A	METHICILLIN SODIUM	48	100	3436	345.643	3123.45
MCF10A	OXIBENDAZOLE	48	10	3551	345.643	3123.45
MCF10A	GAMBOGIC ACID	48	10	3991	345.643	3123.45
MCF10A	ATORVASTATIN CALCIUM	48	1000	2990	345.643	3123.45
MCF10A	CIPROFLOXACIN	48	10	3667	345.643	3123.45
MCF10A	PECTOLINARIN	48	10	3290	345.643	3123.45
MCF10A	OBTUSAQUINONE	48	10	4408	345.643	3123.45
MCF10A	ISOSORBIDE MONONITRATE	48	5000	3567	345.643	3123.45
MCF10A	PALMATINE	48	1	3379	345.643	3123.45
MCF10A	NONIVAMIDE	48	1000	3916	345.643	3123.45
MCF10A	NITROMIDE	48	5000	3322	345.643	3123.45
MCF10A	4-PHENYLBUTYRIC ACID	48	5000	2534	345.643	3123.45
MCF10A	DEFERASIROX	48	1000	3196	345.643	3123.45
MCF10A	NIFEDIPINE	48	5000	3406	345.643	3123.45
MCF10A	PIPOBROMAN	48	1	3351	345.643	3123.45
MCF10A	MEPIROXOL	48	5000	3264	345.643	3123.45
MCF10A	METHOXAMINE HYDROCHLORIDE	48	100	3836	345.643	3123.45
MCF10A	PAROXYPROPIONE	48	1000	3547	345.643	3123.45
MCF10A	GOSSYPETIN	48	5000	3256	345.643	3123.45
MCF10A	AMINOETHOXYDIPHENYLBORANE	48	10	3207	345.643	3123.45
MCF10A	ESZOPICLONE	48	10	3127	345.643	3123.45
MCF10A	PAROXYPROPIONE	48	1	3254	345.643	3123.45
MCF10A	METHIMAZOLE	48	10	3302	345.643	3123.45
MCF10A	ISOSAFROLE	48	10	3703	345.643	3123.45
MCF10A	STAVUDINE	48	100	3955	345.643	3123.45
MCF10A	SUXIBUZONE	48	100	2335	345.643	3123.45
MCF10A	VIGABATRIN	48	5000	2545	345.643	3123.45
MCF10A	DOXIFLURIDINE	48	1000	2924	345.643	3123.45
MCF10A	BOLDINE	48	100	3266	345.643	3123.45
MCF10A	METAPROTERENOL	48	10	3249	345.643	3123.45
MCF10A	6-HYDROXYANGOLENSIC ACID METHYL ESTER	48	1000	3535	345.643	3123.45
MCF10A	OXIBENDAZOLE	48	100	3450	345.643	3123.45
MCF10A	METHIMAZOLE	48	5000	3375	345.643	3123.45
MCF10A	HUMULENE (alpha)	48	5000	3230	345.643	3123.45
MCF10A	alpha-TOCHOPHEROL [4 mM]	48	5000	3341	345.643	3123.45
MCF10A	MELEZITOSE	48	1	3420	345.643	3123.45
MCF10A	DEFERASIROX	48	5000	1820	345.643	3123.45
MCF10A	FOLIC ACID	48	100	3875	345.643	3123.45
MCF10A	ICARIIN	48	5000	3409	345.643	3123.45
MCF10A	NITROMIDE	48	1000	3235	345.643	3123.45
MCF10A	DEFERASIROX	48	100	3379	345.643	3123.45
MCF10A	RESVERATROL	48	10	3447	345.643	3123.45
MCF10A	OXIBENDAZOLE	48	1	3842	345.643	3123.45
MCF10A	HYDROQUININE HYDROBROMIDE HYDRATE	48	1000	3621	345.643	3123.45
MCF10A	4-PHENYLBUTYRIC ACID	48	1	2911	345.643	3123.45
MCF10A	FOLIC ACID	48	10	3422	345.643	3123.45
MCF10A	MELEZITOSE	48	5000	3185	345.643	3123.45
MCF10A	PAROXYPROPIONE	48	100	3378	345.643	3123.45
MCF10A	METRONIDAZOLE	48	10	3152	345.643	3123.45
MCF10A	PALMATINE	48	1000	2557	345.643	3123.45
MCF10A	RESVERATROL	48	1000	3286	345.643	3123.45
MCF10A	6-HYDROXYANGOLENSIC ACID METHYL ESTER	48	100	3466	345.643	3123.45
MCF10A	PYROGALLIN	48	1000	3234	345.643	3123.45
MCF10A	METHOXAMINE HYDROCHLORIDE	48	5000	4065	345.643	3123.45
MCF10A	CIPROFLOXACIN	48	5000	3878	345.643	3123.45
MCF10A	ICARIIN	48	100	3524	345.643	3123.45
MCF10A	METHOXSALEN	48	1000	2850	345.643	3123.45
MCF10A	METHOXSALEN	48	5000	2971	345.643	3123.45
MCF10A	RESVERATROL	48	5000	3485	345.643	3123.45
MCF10A	ICARIIN	48	1	3271	345.643	3123.45
MCF10A	GOSSYPETIN	48	1000	3656	345.643	3123.45
MCF10A	ACETYLGLUTAMIC ACID	48	5000	2875	345.643	3123.45
MCF10A	ACYCLOVIR	48	100	4244	345.643	3123.45
MCF10A	BOLDINE	48	1000	3330	345.643	3123.45
MCF10A	METHICILLIN SODIUM	48	5000	3189	345.643	3123.45
MCF10A	HUMULENE (alpha)	48	100	3565	345.643	3123.45
MCF10A	METHSCOPOLAMINE BROMIDE	48	1	3345	345.643	3123.45
MCF10A	METHOXSALEN	48	100	2915	345.643	3123.45
MCF10A	'3,4-DIMETHOXYFLAVONE'	48	1000	3223	345.643	3123.45
MCF10A	CIPROFLOXACIN	48	1000	3934	345.643	3123.45
MCF10A	DOXIFLURIDINE	48	1	3375	345.643	3123.45
MCF10A	ISOSAFROLE	48	1000	3511	345.643	3123.45
MCF10A	PEUCENIN	48	10	3392	345.643	3123.45
MCF10A	alpha-TOCHOPHEROL [4 mM]	48	1000	3081	345.643	3123.45
MCF10A	MELEZITOSE	48	1000	3105	345.643	3123.45
MCF10A	MEPIROXOL	48	1	3408	345.643	3123.45
MCF10A	'3,4-DIMETHOXYFLAVONE'	48	1	3537	345.643	3123.45
MCF10A	METHICILLIN SODIUM	48	1	3490	345.643	3123.45
MCF10A	'3,4-DIMETHOXYFLAVONE'	48	5000	2901	345.643	3123.45
MCF10A	NIFEDIPINE	48	1	3213	345.643	3123.45
MCF10A	STAVUDINE	48	1	3681	345.643	3123.45
MCF10A	METAPROTERENOL	48	1	3161	345.643	3123.45
MCF10A	STAVUDINE	48	1000	4096	345.643	3123.45
MCF10A	PYROGALLIN	48	1	3553	345.643	3123.45
MCF10A	MEPIROXOL	48	1000	3594	345.643	3123.45
MCF10A	beta-AMYRIN	48	1	3020	345.643	3123.45
MCF10A	PIPOBROMAN	48	10	3378	345.643	3123.45
MCF10A	ISOSAFROLE	48	100	3221	345.643	3123.45
MCF10A	FOLIC ACID	48	1	3429	345.643	3123.45
MCF10A	NONIVAMIDE	48	1	3357	345.643	3123.45
MCF10A	PAROXYPROPIONE	48	5000	3323	345.643	3123.45
MCF10A	MEPIROXOL	48	100	3564	345.643	3123.45
MCF10A	METHOXAMINE HYDROCHLORIDE	48	10	3653	345.643	3123.45
MCF10A	'6,2-DIMETHOXYFLAVONE'	48	100	4152	345.643	3123.45
MCF10A	ESZOPICLONE	48	1000	3249	345.643	3123.45
MCF10A	ICARIIN	48	10	3277	345.643	3123.45
MCF10A	PEUCENIN	48	5000	2959	345.643	3123.45
MCF10A	'3,4-DIMETHOXYFLAVONE'	48	100	3202	345.643	3123.45
MCF10A	alpha-TOCHOPHEROL [4 mM]	48	10	3562	345.643	3123.45
MCF10A	METHOXAMINE HYDROCHLORIDE	48	1	3263	345.643	3123.45
MCF10A	ISOSAFROLE	48	5000	3460	345.643	3123.45
MCF10A	AMINOETHOXYDIPHENYLBORANE	48	1	2920	345.643	3123.45
MCF10A	ACYCLOVIR	48	1000	3626	345.643	3123.45
MCF10A	CIPROFLOXACIN	48	1	2952	345.643	3123.45
MCF10A	OXIBENDAZOLE	48	1000	913	345.643	3123.45
MCF10A	CACODYLIC ACID	48	1000	3685	345.643	3123.45
MCF10A	BOLDINE	48	5000	4226	345.643	3123.45
MCF10A	GAMBOGIC ACID	48	100	4211	345.643	3123.45
MCF10A	PIPOBROMAN	48	5000	3297	345.643	3123.45
MCF10A	GAMBOGIC ACID	48	1	4004	345.643	3123.45
MCF10A	'6,2-DIMETHOXYFLAVONE'	48	1	3567	345.643	3123.45
MCF10A	ACYCLOVIR	48	5000	3541	345.643	3123.45
MCF10A	AMINOETHOXYDIPHENYLBORANE	48	5000	3416	345.643	3123.45
MCF10A	METAPROTERENOL	48	5000	3739	345.643	3123.45
MCF10A	AMINOETHOXYDIPHENYLBORANE	48	100	3474	345.643	3123.45
MCF10A	PEUCENIN	48	1	2900	345.643	3123.45
MCF10A	RESVERATROL	48	100	3548	345.643	3123.45
MCF10A	PECTOLINARIN	48	100	3464	345.643	3123.45
MCF10A	4-PHENYLBUTYRIC ACID	48	10	3473	345.643	3123.45
MCF10A	METHICILLIN SODIUM	48	10	3609	345.643	3123.45
MCF10A	OBTUSAQUINONE	48	1000	2968	345.643	3123.45
MCF10A	PIPOBROMAN	48	100	3404	345.643	3123.45
MCF10A	CACODYLIC ACID	48	5000	3310	345.643	3123.45
MCF10A	NIFEDIPINE	48	10	3170	345.643	3123.45
MCF10A	METHOXAMINE HYDROCHLORIDE	48	1000	3884	345.643	3123.45
MCF10A	4-PHENYLBUTYRIC ACID	48	100	2732	345.643	3123.45
MCF10A	FOLIC ACID	48	5000	3591	345.643	3123.45
MCF10A	MELEZITOSE	48	10	3560	345.643	3123.45
MCF10A	ATORVASTATIN CALCIUM	48	5000	2699	345.643	3123.45
MCF10A	HYDROQUININE HYDROBROMIDE HYDRATE	48	10	2856	345.643	3123.45
MCF10A	HUMULENE (alpha)	48	1000	3402	345.643	3123.45
MCF10A	METAPROTERENOL	48	100	3535	345.643	3123.45
MCF10A	ESZOPICLONE	48	100	3023	345.643	3123.45
MCF10A	NONIVAMIDE	48	100	3264	345.643	3123.45
MCF10A	alpha-TOCHOPHEROL [4 mM]	48	1	3382	345.643	3123.45
MCF10A	PECTOLINARIN	48	1000	3520	345.643	3123.45
MCF10A	PEUCENIN	48	100	3158	345.643	3123.45
MCF10A	OBTUSAQUINONE	48	1	4230	345.643	3123.45
MCF10A	ESZOPICLONE	48	5000	3087	345.643	3123.45
MCF10A	'6,2-DIMETHOXYFLAVONE'	48	5000	3526	345.643	3123.45
MCF10A	STAVUDINE	48	10	4225	345.643	3123.45
MCF10A	BOLDINE	48	1	3533	345.643	3123.45
MCF10A	NITROMIDE	48	1	3302	345.643	3123.45
MCF10A	ACETYLGLUTAMIC ACID	48	1	4019	345.643	3123.45
MCF10A	PAROXYPROPIONE	48	10	3120	345.643	3123.45
MCF10A	NIFEDIPINE	48	100	3364	345.643	3123.45
MCF10A	ISOSORBIDE MONONITRATE	48	1	3701	345.643	3123.45
MCF10A	GOSSYPETIN	48	10	2835	345.643	3123.45
MCF10A	DEFERASIROX	48	10	3564	345.643	3123.45
MCF10A	6-HYDROXYANGOLENSIC ACID METHYL ESTER	48	5000	3704	345.643	3123.45
MCF10A	METRONIDAZOLE	48	100	3531	345.643	3123.45
MCF10A	ISOSORBIDE MONONITRATE	48	1000	3911	345.643	3123.45
MCF10A	HYDROQUININE HYDROBROMIDE HYDRATE	48	5000	3704	345.643	3123.45
MCF10A	GAMBOGIC ACID	48	1000	3695	345.643	3123.45
MCF10A	METRONIDAZOLE	48	5000	2894	345.643	3123.45
MCF10A	PALMATINE	48	100	3527	345.643	3123.45
MCF10A	DEFERASIROX	48	1	3169	345.643	3123.45
MCF10A	MELEZITOSE	48	100	3434	345.643	3123.45
MCF10A	PEUCENIN	48	1000	2935	345.643	3123.45
MCF10A	PECTOLINARIN	48	1	3352	345.643	3123.45
MCF10A	METHIMAZOLE	48	1000	3628	345.643	3123.45
MCF10A	ESZOPICLONE	48	1	3467	345.643	3123.45
MCF10A	METHSCOPOLAMINE BROMIDE	48	10	3579	345.643	3123.45
MCF10A	METHIMAZOLE	48	100	2222	345.643	3123.45
MCF10A	ACETYLGLUTAMIC ACID	48	100	3730	345.643	3123.45
MCF10A	CACODYLIC ACID	48	1	3625	345.643	3123.45
MCF10A	SUXIBUZONE	48	1	3876	345.643	3123.45
MCF10A	DOXIFLURIDINE	48	10	3852	345.643	3123.45
MCF10A	DOXIFLURIDINE	48	100	3472	345.643	3123.45
MCF10A	6-HYDROXYANGOLENSIC ACID METHYL ESTER	48	1	3215	345.643	3123.45
MCF10A	NITROMIDE	48	100	3409	345.643	3123.45
MCF10A	VIGABATRIN	48	10	2865	345.643	3123.45
MCF10A	FOLIC ACID	48	1000	3352	345.643	3123.45
MCF10A	METHICILLIN SODIUM	48	1000	3544	345.643	3123.45
MCF10A	GOSSYPETIN	48	100	3273	345.643	3123.45
MCF10A	METHIMAZOLE	48	1	3084	345.643	3123.45
MCF10A	beta-AMYRIN	48	1000	3251	345.643	3123.45
MCF10A	METHOXSALEN	48	10	3307	345.643	3123.45
MCF10A	VIGABATRIN	48	1	3247	345.643	3123.45
MCF10A	'6,2-DIMETHOXYFLAVONE'	48	10	3875	345.643	3123.45
MCF10A	OBTUSAQUINONE	48	5000	2804	345.643	3123.45
MCF10A	METRONIDAZOLE	48	1000	3254	345.643	3123.45
MCF10A	METAPROTERENOL	48	1000	3355	345.643	3123.45
MCF10A	ACYCLOVIR	48	1	3940	345.643	3123.45
MCF10A	PALMATINE	48	5000	2235	345.643	3123.45
MCF10A	ISOSORBIDE MONONITRATE	48	100	4312	345.643	3123.45
MCF10A	6-HYDROXYANGOLENSIC ACID METHYL ESTER	48	10	3131	345.643	3123.45
MCF10A	CACODYLIC ACID	48	10	3450	345.643	3123.45
MCF10A	DOXIFLURIDINE	48	5000	1197	345.643	3123.45
MCF10A	ATORVASTATIN CALCIUM	48	100	3093	345.643	3123.45
MCF10A	BOLDINE	48	10	3694	345.643	3123.45
MCF10A	METHSCOPOLAMINE BROMIDE	48	5000	3836	345.643	3123.45
MCF10A	HUMULENE (alpha)	48	10	3315	345.643	3123.45
MCF10A	MEPIROXOL	48	10	3650	345.643	3123.45
MCF10A	METHSCOPOLAMINE BROMIDE	48	1000	3621	345.643	3123.45
MCF10A	VIGABATRIN	48	1000	4075	345.643	3123.45
MCF10A	GOSSYPETIN	48	1	3263	345.643	3123.45
MCF10A	ACETYLGLUTAMIC ACID	48	10	3010	345.643	3123.45
MCF10A	PYROGALLIN	48	10	3358	345.643	3123.45
MCF10A	METHSCOPOLAMINE BROMIDE	48	100	3425	345.643	3123.45
MCF10A	PIPOBROMAN	48	1000	3612	345.643	3123.45
MCF10A	OXIBENDAZOLE	48	5000	3106	345.643	3123.45
MCF10A	SUXIBUZONE	48	1000	4048	345.643	3123.45
MCF10A	HUMULENE (alpha)	48	1	3331	345.643	3123.45
MCF10A	alpha-TOCHOPHEROL [4 mM]	48	100	3913	345.643	3123.45
MCF10A	RESVERATROL	48	1	3159	345.643	3123.45
MCF10A	NONIVAMIDE	48	10	3583	345.643	3123.45
MCF10A	ISOSAFROLE	48	1	3278	345.643	3123.45
MCF10A	NONIVAMIDE	48	5000	4190	345.643	3123.45
MCF10A	AMINOETHOXYDIPHENYLBORANE	48	1000	3179	345.643	3123.45
MCF10A	'6,2-DIMETHOXYFLAVONE'	48	1000	4293	345.643	3123.45
MCF10A	PYROGALLIN	48	100	3767	345.643	3123.45
MCF10A	SUXIBUZONE	48	10	3316	345.643	3123.45
MCF10A	ISOSORBIDE MONONITRATE	48	10	3673	345.643	3123.45
MCF10A	SUXIBUZONE	48	5000	2236	345.643	3123.45
MCF10A	beta-AMYRIN	48	5000	3109	345.643	3123.45
MCF10A	METHOXSALEN	48	1	3906	345.643	3123.45
MCF10A	beta-AMYRIN	48	10	3310	345.643	3123.45
MCF10A	NIFEDIPINE	48	1000	3458	345.643	3123.45
MCF10A	ATORVASTATIN CALCIUM	48	1	3112	345.643	3123.45
MCF10A	beta-AMYRIN	48	100	3131	345.643	3123.45
MCF10A	HYDROQUININE HYDROBROMIDE HYDRATE	48	1	3365	345.643	3123.45
MCF10A	'3,4-DIMETHOXYFLAVONE'	48	10	3288	345.643	3123.45
MCF10A	ACETYLGLUTAMIC ACID	48	1000	3339	345.643	3123.45
MCF10A	VIGABATRIN	48	100	3279	345.643	3123.45
MCF10A	OBTUSAQUINONE	48	100	4145	345.643	3123.45
MCF10A	ICARIIN	48	1000	3744	345.643	3123.45
MCF10A	ACYCLOVIR	48	10	4183	345.643	3123.45
MCF10A	DIMETHYLFRAXETIN	48	100	3549	345.643	3077.95
MCF10A	EFAROXAN HYDROCHLORIDE	48	10	3336	345.643	3077.95
MCF10A	BISSALICYL FUMARATE	48	5000	3302	345.643	3077.95
MCF10A	4-ANISALDEHYDE	48	1	3474	345.643	3077.95
MCF10A	NITARSONE	48	1	3246	345.643	3077.95
MCF10A	CORTISONE	48	1	3097	345.643	3077.95
MCF10A	3-DESMETHYL-5-DESHYDROXYSCLEROIN	48	5000	2633	345.643	3077.95
MCF10A	NAFRONYL OXALATE	48	5000	3328	345.643	3077.95
MCF10A	JOSAMYCIN	48	1	3580	345.643	3077.95
MCF10A	ALLOPREGNANOLONE	48	1	3168	345.643	3077.95
MCF10A	QUIPAZINE MALEATE	48	10	3124	345.643	3077.95
MCF10A	CORTISONE	48	5000	2973	345.643	3077.95
MCF10A	MILRINONE	48	1000	3209	345.643	3077.95
MCF10A	METOCLOPRAMIDE HYDROCHLORIDE	48	5000	3173	345.643	3077.95
MCF10A	NITARSONE	48	10	3377	345.643	3077.95
MCF10A	ACETYLTRYPTOPHAN	48	1000	4114	345.643	3077.95
MCF10A	METHYLXANTHOXYLIN	48	5000	3414	345.643	3077.95
MCF10A	5-FLUOROINDOLE-2-CARBOXYLIC ACID	48	1	3563	345.643	3077.95
MCF10A	NAFRONYL OXALATE	48	10	3264	345.643	3077.95
MCF10A	BISSALICYL FUMARATE	48	10	3423	345.643	3077.95
MCF10A	PIZOTYLINE MALATE	48	5000	3868	345.643	3077.95
MCF10A	'7,8-DIHYDROXYFLAVONE'	48	5000	2676	345.643	3077.95
MCF10A	3-DESMETHYL-5-DESHYDROXYSCLEROIN	48	1	3330	345.643	3077.95
MCF10A	METICRANE	48	5000	3294	345.643	3077.95
MCF10A	NITARSONE	48	1000	3193	345.643	3077.95
MCF10A	LEVETIRACETAM	48	10	3333	345.643	3077.95
MCF10A	LANOSTEROL	48	10	3623	345.643	3077.95
MCF10A	EFAROXAN HYDROCHLORIDE	48	1000	3232	345.643	3077.95
MCF10A	EPITHEAFLAVIC ACID	48	10	3658	345.643	3077.95
MCF10A	PHENETHYL CAFFEATE (CAPE)	48	10	3187	345.643	3077.95
MCF10A	PHENETHYL CAFFEATE (CAPE)	48	5000	2473	345.643	3077.95
MCF10A	PENCICLOVIR	48	10	3841	345.643	3077.95
MCF10A	CRYPTOTANSHINONE	48	10	3591	345.643	3077.95
MCF10A	MENBUTONE	48	100	3578	345.643	3077.95
MCF10A	BENZYL ALCOHOL	48	5000	3695	345.643	3077.95
MCF10A	THIAMINE	48	100	2960	345.643	3077.95
MCF10A	ERGOSTEROL ACETATE	48	5000	3097	345.643	3077.95
MCF10A	URACIL	48	5000	3313	345.643	3077.95
MCF10A	DIGITONIN	48	1	3583	345.643	3077.95
MCF10A	PHENETHYL CAFFEATE (CAPE)	48	100	3127	345.643	3077.95
MCF10A	QUIPAZINE MALEATE	48	1000	3512	345.643	3077.95
MCF10A	3-DESMETHYL-5-DESHYDROXYSCLEROIN	48	1000	3203	345.643	3077.95
MCF10A	ACETYLTRYPTOPHAN	48	10	2922	345.643	3077.95
MCF10A	GENISTEIN	48	10	3444	345.643	3077.95
MCF10A	SODIUM FLUOROACETATE	48	5000	2531	345.643	3077.95
MCF10A	CANDESARTAN	48	10	3483	345.643	3077.95
MCF10A	CORTISONE	48	1000	3162	345.643	3077.95
MCF10A	SULBACTAM	48	10	3856	345.643	3077.95
MCF10A	4-ANISALDEHYDE	48	5000	3266	345.643	3077.95
MCF10A	DEXIBUPROFEN	48	5000	3544	345.643	3077.95
MCF10A	GENISTEIN	48	1	4003	345.643	3077.95
MCF10A	5-FLUOROINDOLE-2-CARBOXYLIC ACID	48	100	3306	345.643	3077.95
MCF10A	ELAIDYLPHOSPHOCHOLINE	48	1	3205	345.643	3077.95
MCF10A	DIAVERIDINE	48	1000	3148	345.643	3077.95
MCF10A	DIGITONIN	48	100	3355	345.643	3077.95
MCF10A	5-FLUOROINDOLE-2-CARBOXYLIC ACID	48	10	3548	345.643	3077.95
MCF10A	DEXIBUPROFEN	48	100	3279	345.643	3077.95
MCF10A	CHOLIC ACID	48	10	3409	345.643	3077.95
MCF10A	ALLOPREGNANOLONE	48	5000	3048	345.643	3077.95
MCF10A	NAFRONYL OXALATE	48	100	3558	345.643	3077.95
MCF10A	XANTHURENIC ACID	48	10	3395	345.643	3077.95
MCF10A	BISSALICYL FUMARATE	48	1	3260	345.643	3077.95
MCF10A	PENCICLOVIR	48	5000	2938	345.643	3077.95
MCF10A	METOCLOPRAMIDE HYDROCHLORIDE	48	100	2936	345.643	3077.95
MCF10A	QUIPAZINE MALEATE	48	5000	3254	345.643	3077.95
MCF10A	BENZYL ALCOHOL	48	10	3199	345.643	3077.95
MCF10A	EVERNIC ACID	48	1	2745	345.643	3077.95
MCF10A	MONENSIN SODIUM	48	100	2848	345.643	3077.95
MCF10A	CRYPTOTANSHINONE	48	1	3168	345.643	3077.95
MCF10A	4-ANISALDEHYDE	48	1000	3270	345.643	3077.95
MCF10A	GENISTEIN	48	100	3629	345.643	3077.95
MCF10A	ELAIDYLPHOSPHOCHOLINE	48	100	3188	345.643	3077.95
MCF10A	DIAVERIDINE	48	5000	1915	345.643	3077.95
MCF10A	MONENSIN SODIUM	48	10	3023	345.643	3077.95
MCF10A	XANTHURENIC ACID	48	1000	3022	345.643	3077.95
MCF10A	MILRINONE	48	5000	2499	345.643	3077.95
MCF10A	DEXIBUPROFEN	48	10	3487	345.643	3077.95
MCF10A	MILRINONE	48	1	2828	345.643	3077.95
MCF10A	METICRANE	48	100	3116	345.643	3077.95
MCF10A	'7,2-DIMETHOXYFLAVONE'	48	1000	3322	345.643	3077.95
MCF10A	PIZOTYLINE MALATE	48	1	3695	345.643	3077.95
MCF10A	CELECOXIB	48	1	3331	345.643	3077.95
MCF10A	LEVETIRACETAM	48	1000	3522	345.643	3077.95
MCF10A	XANTHURENIC ACID	48	100	3112	345.643	3077.95
MCF10A	PIZOTYLINE MALATE	48	1000	3358	345.643	3077.95
MCF10A	NITARSONE	48	100	3304	345.643	3077.95
MCF10A	METHYLXANTHOXYLIN	48	1	3018	345.643	3077.95
MCF10A	BENZYL ALCOHOL	48	1	3017	345.643	3077.95
MCF10A	THIAMINE	48	5000	2504	345.643	3077.95
MCF10A	DEXIBUPROFEN	48	1	3118	345.643	3077.95
MCF10A	MILRINONE	48	100	3079	345.643	3077.95
MCF10A	METHYLXANTHOXYLIN	48	1000	2923	345.643	3077.95
MCF10A	CANDESARTAN	48	100	3298	345.643	3077.95
MCF10A	'7,8-DIHYDROXYFLAVONE'	48	100	2878	345.643	3077.95
MCF10A	JOSAMYCIN	48	5000	3176	345.643	3077.95
MCF10A	NIFURSOL	48	5000	3416	345.643	3077.95
MCF10A	CRYPTOTANSHINONE	48	100	3234	345.643	3077.95
MCF10A	CANDESARTAN	48	5000	3025	345.643	3077.95
MCF10A	EPITHEAFLAVIC ACID	48	5000	3646	345.643	3077.95
MCF10A	CELECOXIB	48	100	3509	345.643	3077.95
MCF10A	JOSAMYCIN	48	10	3585	345.643	3077.95
MCF10A	LANOSTEROL	48	1	3260	345.643	3077.95
MCF10A	EVERNIC ACID	48	5000	3288	345.643	3077.95
MCF10A	EPITHEAFLAVIC ACID	48	100	3610	345.643	3077.95
MCF10A	MENBUTONE	48	1	3447	345.643	3077.95
MCF10A	XANTHURENIC ACID	48	5000	3380	345.643	3077.95
MCF10A	EVERNIC ACID	48	100	3655	345.643	3077.95
MCF10A	ALLOPREGNANOLONE	48	10	3338	345.643	3077.95
MCF10A	'7,2-DIMETHOXYFLAVONE'	48	1	3709	345.643	3077.95
MCF10A	SULBACTAM	48	100	3318	345.643	3077.95
MCF10A	CORTISONE	48	100	3455	345.643	3077.95
MCF10A	'7,8-DIHYDROXYFLAVONE'	48	1000	2921	345.643	3077.95
MCF10A	CORTISONE	48	10	3035	345.643	3077.95
MCF10A	QUIPAZINE MALEATE	48	100	3386	345.643	3077.95
MCF10A	SULBACTAM	48	1	3732	345.643	3077.95
MCF10A	SODIUM FLUOROACETATE	48	1	3436	345.643	3077.95
MCF10A	DIMETHYLFRAXETIN	48	1000	3397	345.643	3077.95
MCF10A	METHYLXANTHOXYLIN	48	10	3576	345.643	3077.95
MCF10A	SODIUM FLUOROACETATE	48	1000	3374	345.643	3077.95
MCF10A	DIFLOXACIN HYDROCHLORIDE	48	1000	4039	345.643	3077.95
MCF10A	DIAVERIDINE	48	1	3100	345.643	3077.95
MCF10A	JOSAMYCIN	48	1000	3477	345.643	3077.95
MCF10A	'7,8-DIHYDROXYFLAVONE'	48	10	3147	345.643	3077.95
MCF10A	METICRANE	48	1000	2770	345.643	3077.95
MCF10A	PHENETHYL CAFFEATE (CAPE)	48	1000	2866	345.643	3077.95
MCF10A	GENISTEIN	48	1000	3291	345.643	3077.95
MCF10A	NIFURSOL	48	10	3561	345.643	3077.95
MCF10A	THIAMINE	48	10	2980	345.643	3077.95
MCF10A	GENISTEIN	48	5000	3166	345.643	3077.95
MCF10A	LEVETIRACETAM	48	100	3601	345.643	3077.95
MCF10A	3-DESMETHYL-5-DESHYDROXYSCLEROIN	48	10	3136	345.643	3077.95
MCF10A	ALLOPREGNANOLONE	48	1000	3447	345.643	3077.95
MCF10A	MENBUTONE	48	5000	3696	345.643	3077.95
MCF10A	PENCICLOVIR	48	1	3150	345.643	3077.95
MCF10A	LANOSTEROL	48	1000	3113	345.643	3077.95
MCF10A	THIAMINE	48	1	3625	345.643	3077.95
MCF10A	METICRANE	48	1	3481	345.643	3077.95
MCF10A	PIZOTYLINE MALATE	48	100	3440	345.643	3077.95
MCF10A	EVERNIC ACID	48	10	3211	345.643	3077.95
MCF10A	4-ANISALDEHYDE	48	100	3133	345.643	3077.95
MCF10A	GLUTAMINE (D)	48	5000	2908	345.643	3077.95
MCF10A	3-DESMETHYL-5-DESHYDROXYSCLEROIN	48	100	3082	345.643	3077.95
MCF10A	SULBACTAM	48	1000	2756	345.643	3077.95
MCF10A	BENZYLHYDRAZINE HYDROCHLORIDE	48	100	3212	345.643	3077.95
MCF10A	DIAVERIDINE	48	100	3017	345.643	3077.95
MCF10A	CELECOXIB	48	1000	3474	345.643	3077.95
MCF10A	DIGITONIN	48	10	2983	345.643	3077.95
MCF10A	4-ANISALDEHYDE	48	10	3446	345.643	3077.95
MCF10A	5-FLUOROINDOLE-2-CARBOXYLIC ACID	48	1000	3022	345.643	3077.95
MCF10A	ERGOSTEROL ACETATE	48	100	3543	345.643	3077.95
MCF10A	NAFRONYL OXALATE	48	1	3727	345.643	3077.95
MCF10A	ELAIDYLPHOSPHOCHOLINE	48	5000	2987	345.643	3077.95
MCF10A	ELAIDYLPHOSPHOCHOLINE	48	10	3414	345.643	3077.95
MCF10A	SODIUM FLUOROACETATE	48	10	3642	345.643	3077.95
MCF10A	LANOSTEROL	48	100	3392	345.643	3077.95
MCF10A	PHENETHYL CAFFEATE (CAPE)	48	1	3084	345.643	3077.95
MCF10A	MONENSIN SODIUM	48	1	3364	345.643	3077.95
MCF10A	MONENSIN SODIUM	48	1000	3208	345.643	3077.95
MCF10A	DIMETHYLFRAXETIN	48	10	3855	345.643	3077.95
MCF10A	URACIL	48	10	3205	345.643	3077.95
MCF10A	BISSALICYL FUMARATE	48	1000	3764	345.643	3077.95
MCF10A	CRYPTOTANSHINONE	48	5000	3436	345.643	3077.95
MCF10A	PENCICLOVIR	48	1000	3134	345.643	3077.95
MCF10A	JOSAMYCIN	48	100	3509	345.643	3077.95
MCF10A	EPITHEAFLAVIC ACID	48	1	3401	345.643	3077.95
MCF10A	GLUTAMINE (D)	48	100	3767	345.643	3077.95
MCF10A	CELECOXIB	48	10	3273	345.643	3077.95
MCF10A	EVERNIC ACID	48	1000	3456	345.643	3077.95
MCF10A	NIFURSOL	48	1000	3662	345.643	3077.95
MCF10A	PENCICLOVIR	48	100	3223	345.643	3077.95
MCF10A	BENZYLHYDRAZINE HYDROCHLORIDE	48	1	3353	345.643	3077.95
MCF10A	LANOSTEROL	48	5000	2606	345.643	3077.95
MCF10A	THIAMINE	48	1000	3005	345.643	3077.95
MCF10A	DIFLOXACIN HYDROCHLORIDE	48	5000	3542	345.643	3077.95
MCF10A	PIZOTYLINE MALATE	48	10	3540	345.643	3077.95
MCF10A	ELAIDYLPHOSPHOCHOLINE	48	1000	2765	345.643	3077.95
MCF10A	CANDESARTAN	48	1	3064	345.643	3077.95
MCF10A	BENZYLHYDRAZINE HYDROCHLORIDE	48	10	3071	345.643	3077.95
MCF10A	'7,2-DIMETHOXYFLAVONE'	48	10	3448	345.643	3077.95
MCF10A	DIAVERIDINE	48	10	3367	345.643	3077.95
MCF10A	NITARSONE	48	5000	3352	345.643	3077.95
MCF10A	METOCLOPRAMIDE HYDROCHLORIDE	48	1000	3256	345.643	3077.95
MCF10A	CHOLIC ACID	48	1000	3306	345.643	3077.95
MCF10A	MENBUTONE	48	10	3191	345.643	3077.95
MCF10A	METOCLOPRAMIDE HYDROCHLORIDE	48	10	3217	345.643	3077.95
MCF10A	CHOLIC ACID	48	1	2841	345.643	3077.95
MCF10A	URACIL	48	100	3445	345.643	3077.95
MCF10A	BISSALICYL FUMARATE	48	100	2910	345.643	3077.95
MCF10A	EPITHEAFLAVIC ACID	48	1000	3690	345.643	3077.95
MCF10A	SULBACTAM	48	5000	3184	345.643	3077.95
MCF10A	CHOLIC ACID	48	100	2913	345.643	3077.95
MCF10A	EFAROXAN HYDROCHLORIDE	48	5000	2917	345.643	3077.95
MCF10A	EFAROXAN HYDROCHLORIDE	48	1	3556	345.643	3077.95
MCF10A	METOCLOPRAMIDE HYDROCHLORIDE	48	1	3316	345.643	3077.95
MCF10A	NAFRONYL OXALATE	48	1000	3712	345.643	3077.95
MCF10A	'7,2-DIMETHOXYFLAVONE'	48	5000	3140	345.643	3077.95
MCF10A	DIGITONIN	48	5000	2476	345.643	3077.95
MCF10A	CRYPTOTANSHINONE	48	1000	2735	345.643	3077.95
MCF10A	EFAROXAN HYDROCHLORIDE	48	100	3504	345.643	3077.95
MCF10A	DIFLOXACIN HYDROCHLORIDE	48	100	3733	345.643	3077.95
MCF10A	ALLOPREGNANOLONE	48	100	2877	345.643	3077.95
MCF10A	QUIPAZINE MALEATE	48	1	3211	345.643	3077.95
MCF10A	ERGOSTEROL ACETATE	48	1	3350	345.643	3077.95
MCF10A	METHYLXANTHOXYLIN	48	100	3051	345.643	3077.95
MCF10A	ERGOSTEROL ACETATE	48	1000	3280	345.643	3077.95
MCF10A	DIGITONIN	48	1000	3071	345.643	3077.95
MCF10A	MONENSIN SODIUM	48	5000	2840	345.643	3077.95
MCF10A	DIMETHYLFRAXETIN	48	5000	3302	345.643	3077.95
MCF10A	ACETYLTRYPTOPHAN	48	100	2974	345.643	3077.95
MCF10A	DIMETHYLFRAXETIN	48	1	3528	345.643	3077.95
MCF10A	METICRANE	48	10	3409	345.643	3077.95
MCF10A	ERGOSTEROL ACETATE	48	10	2887	345.643	3077.95
MCF10A	CHOLIC ACID	48	5000	2321	345.643	3077.95
MCF10A	BENZYL ALCOHOL	48	100	3069	345.643	3077.95
MCF10A	LEVETIRACETAM	48	5000	3505	345.643	3077.95
MCF10A	NIFURSOL	48	1	3173	345.643	3077.95
MCF10A	DEXIBUPROFEN	48	1000	3085	345.643	3077.95
MCF10A	GLUTAMINE (D)	48	1000	3776	345.643	3077.95
MCF10A	URACIL	48	1	3069	345.643	3077.95
MCF10A	GLUTAMINE (D)	48	1	3342	345.643	3077.95
MCF10A	DIFLOXACIN HYDROCHLORIDE	48	10	3562	345.643	3077.95
MCF10A	BENZYL ALCOHOL	48	1000	3343	345.643	3077.95
MCF10A	XANTHURENIC ACID	48	1	3283	345.643	3077.95
MCF10A	ACETYLTRYPTOPHAN	48	5000	2198	345.643	3077.95
MCF10A	MILRINONE	48	10	3528	345.643	3077.95
MCF10A	BENZYLHYDRAZINE HYDROCHLORIDE	48	5000	4039	345.643	3077.95
MCF10A	MENBUTONE	48	1000	4135	345.643	3077.95
MCF10A	BENZYLHYDRAZINE HYDROCHLORIDE	48	1000	3271	345.643	3077.95
MCF10A	5-FLUOROINDOLE-2-CARBOXYLIC ACID	48	5000	2979	345.643	3077.95
MCF10A	'7,8-DIHYDROXYFLAVONE'	48	1	2867	345.643	3077.95
MCF10A	DIFLOXACIN HYDROCHLORIDE	48	1	3142	345.643	3077.95
MCF10A	SODIUM FLUOROACETATE	48	100	3057	345.643	3077.95
MCF10A	LEVETIRACETAM	48	1	3642	345.643	3077.95
MCF10A	ACETYLTRYPTOPHAN	48	1	3408	345.643	3077.95
MCF10A	GLUTAMINE (D)	48	10	3196	345.643	3077.95
MCF10A	URACIL	48	1000	3490	345.643	3077.95
MCF10A	NIFURSOL	48	100	3803	345.643	3077.95
MCF10A	CANDESARTAN	48	1000	3612	345.643	3077.95
MCF10A	'7,2-DIMETHOXYFLAVONE'	48	100	3656	345.643	3077.95
MCF10A	CELECOXIB	48	5000	2910	345.643	3077.95
MCF10A	METHYLDOPA	48	100	2965	345.643	2935.31
MCF10A	NEOSTIGMINE BROMIDE	48	1	3009	345.643	2935.31
MCF10A	PENTOXIFYLLINE	48	1000	3468	345.643	2935.31
MCF10A	THALIDOMIDE	48	1000	2933	345.643	2935.31
MCF10A	SODIUM THIOGLYCOLATE	48	10	3132	345.643	2935.31
MCF10A	CHICAGO SKY BLUE	48	100	3020	345.643	2935.31
MCF10A	FORMONONETIN	48	10	3325	345.643	2935.31
MCF10A	AMCINONIDE	48	1000	3064	345.643	2935.31
MCF10A	NAPROXEN	48	5000	3385	345.643	2935.31
MCF10A	TETRAHYDROCORTISONE-21-ACETATE	48	100	3155	345.643	2935.31
MCF10A	PENTOXIFYLLINE	48	100	3310	345.643	2935.31
MCF10A	ESTRADIOL METHYL ETHER	48	100	3213	345.643	2935.31
MCF10A	MARBOFLOXACIN	48	1000	3110	345.643	2935.31
MCF10A	IOHEXOL	48	100	3929	345.643	2935.31
MCF10A	BLEOMYCIN (bleomycin B2 shown)	48	1	3264	345.643	2935.31
MCF10A	ANASTROZOLE	48	10	3519	345.643	2935.31
MCF10A	ECAMSULE TRIETHANOLAMINE	48	10	3059	345.643	2935.31
MCF10A	DESTHIOBIOTIN (+)	48	5000	2417	345.643	2935.31
MCF10A	ESTRADIOL METHYL ETHER	48	10	3449	345.643	2935.31
MCF10A	ECAMSULE TRIETHANOLAMINE	48	1	3129	345.643	2935.31
MCF10A	ACENOCOUMAROL	48	5000	3485	345.643	2935.31
MCF10A	PHENOXYBENZAMINE HYDROCHLORIDE	48	1000	3155	345.643	2935.31
MCF10A	beta-CYCLODEXTRIN	48	1000	3396	345.643	2935.31
MCF10A	'3,4-DIDESMETHYL-5-DESHYDROXY-3-ETHOXYSCLEROIN'	48	1000	3620	345.643	2935.31
MCF10A	'5,7,4-TRIMETHOXYFLAVONE'	48	1	3596	345.643	2935.31
MCF10A	MINOCYCLINE HYDROCHLORIDE	48	100	3073	345.643	2935.31
MCF10A	NEOSTIGMINE BROMIDE	48	1000	3323	345.643	2935.31
MCF10A	ANTAZOLINE	48	5000	3600	345.643	2935.31
MCF10A	TETRAHYDROCORTISONE-21-ACETATE	48	1000	3143	345.643	2935.31
MCF10A	PIMPINELLIN	48	10	3660	345.643	2935.31
MCF10A	TETRAHYDROCORTISONE-21-ACETATE	48	5000	2100	345.643	2935.31
MCF10A	NAPROXEN	48	1000	3208	345.643	2935.31
MCF10A	ANETHOLE	48	1	3560	345.643	2935.31
MCF10A	NEOHESPERIDIN DIHYDROCHALCONE	48	1	3219	345.643	2935.31
MCF10A	NAPROXEN	48	1	3549	345.643	2935.31
MCF10A	PENTOXIFYLLINE	48	1	3433	345.643	2935.31
MCF10A	NITRENDIPINE	48	100	3301	345.643	2935.31
MCF10A	IOHEXOL	48	10	3253	345.643	2935.31
MCF10A	ARCAINE SULFATE	48	5000	3093	345.643	2935.31
MCF10A	KASUGAMYCIN HYDROCHLORIDE	48	1	3132	345.643	2935.31
MCF10A	ECAMSULE TRIETHANOLAMINE	48	5000	3045	345.643	2935.31
MCF10A	'3,4-DIDESMETHYL-5-DESHYDROXY-3-ETHOXYSCLEROIN'	48	1	3265	345.643	2935.31
MCF10A	SODIUM THIOGLYCOLATE	48	1	2987	345.643	2935.31
MCF10A	SILIBININ	48	10	3416	345.643	2935.31
MCF10A	SODIUM THIOGLYCOLATE	48	1000	3140	345.643	2935.31
MCF10A	beta-CYCLODEXTRIN	48	10	3394	345.643	2935.31
MCF10A	BLEOMYCIN (bleomycin B2 shown)	48	10	3141	345.643	2935.31
MCF10A	SILIBININ	48	5000	2697	345.643	2935.31
MCF10A	MARBOFLOXACIN	48	10	3196	345.643	2935.31
MCF10A	TETRAHYDROCORTISONE-21-ACETATE	48	1	2142	345.643	2935.31
MCF10A	GIBBERELLIC ACID	48	1	3531	345.643	2935.31
MCF10A	BENZALKONIUM CHLORIDE	48	5000	842	345.643	2935.31
MCF10A	THIOPHANATE METHYL	48	100	3004	345.643	2935.31
MCF10A	ESTRADIOL METHYL ETHER	48	1	3450	345.643	2935.31
MCF10A	BENZALKONIUM CHLORIDE	48	10	3085	345.643	2935.31
MCF10A	SILIBININ	48	1000	3356	345.643	2935.31
MCF10A	7-NITROINDAZOLE	48	100	2812	345.643	2935.31
MCF10A	METHYLDOPA	48	1000	3182	345.643	2935.31
MCF10A	TETRAHYDROCORTISONE-21-ACETATE	48	10	3078	345.643	2935.31
MCF10A	DESTHIOBIOTIN (+)	48	1000	3358	345.643	2935.31
MCF10A	PHENOXYBENZAMINE HYDROCHLORIDE	48	5000	3186	345.643	2935.31
MCF10A	PIMPINELLIN	48	5000	3436	345.643	2935.31
MCF10A	KASUGAMYCIN HYDROCHLORIDE	48	5000	3279	345.643	2935.31
MCF10A	ARCAINE SULFATE	48	1000	3552	345.643	2935.31
MCF10A	'3,4-DIDESMETHYL-5-DESHYDROXY-3-ETHOXYSCLEROIN'	48	5000	3045	345.643	2935.31
MCF10A	'3,4-DIDESMETHYL-5-DESHYDROXY-3-ETHOXYSCLEROIN'	48	100	3643	345.643	2935.31
MCF10A	THIOPHANATE METHYL	48	1	3456	345.643	2935.31
MCF10A	CHICAGO SKY BLUE	48	1000	3217	345.643	2935.31
MCF10A	'3-AMINO-1,2,4-TRIAZOLE'	48	5000	3282	345.643	2935.31
MCF10A	DIBUTYL PHTHALATE	48	1	3233	345.643	2935.31
MCF10A	FORMONONETIN	48	1000	3770	345.643	2935.31
MCF10A	ANTAZOLINE	48	100	3670	345.643	2935.31
MCF10A	OXONITINE	48	5000	3026	345.643	2935.31
MCF10A	ANTAZOLINE	48	1	3534	345.643	2935.31
MCF10A	SPIRAMYCIN	48	100	3078	345.643	2935.31
MCF10A	ANTAZOLINE	48	10	3187	345.643	2935.31
MCF10A	METHYLDOPA	48	5000	1868	345.643	2935.31
MCF10A	THALIDOMIDE	48	1	3513	345.643	2935.31
MCF10A	NEOMYCIN TRISULFATE	48	10	2968	345.643	2935.31
MCF10A	OXONITINE	48	100	3315	345.643	2935.31
MCF10A	DIMETRIDAZOLE	48	5000	3179	345.643	2935.31
MCF10A	AURAPTENE	48	1	3436	345.643	2935.31
MCF10A	NEOHESPERIDIN DIHYDROCHALCONE	48	5000	2636	345.643	2935.31
MCF10A	DIMETRIDAZOLE	48	1000	3086	345.643	2935.31
MCF10A	DIBUTYL PHTHALATE	48	5000	3118	345.643	2935.31
MCF10A	GIBBERELLIC ACID	48	100	3387	345.643	2935.31
MCF10A	SILIBININ	48	1	3254	345.643	2935.31
MCF10A	ANETHOLE	48	5000	3500	345.643	2935.31
MCF10A	IOHEXOL	48	5000	3448	345.643	2935.31
MCF10A	ACENOCOUMAROL	48	100	3219	345.643	2935.31
MCF10A	'5,7,4-TRIMETHOXYFLAVONE'	48	5000	1401	345.643	2935.31
MCF10A	NEOHESPERIDIN DIHYDROCHALCONE	48	100	3105	345.643	2935.31
MCF10A	NEOMYCIN TRISULFATE	48	1000	3252	345.643	2935.31
MCF10A	'2,3-DIHYDROXY-6,7-DICHLOROQUINOXALINE'	48	10	3302	345.643	2935.31
MCF10A	ARCAINE SULFATE	48	1	3285	345.643	2935.31
MCF10A	DIBUTYL PHTHALATE	48	100	3087	345.643	2935.31
MCF10A	SILIBININ	48	100	3429	345.643	2935.31
MCF10A	'5,7,4-TRIMETHOXYFLAVONE'	48	100	3150	345.643	2935.31
MCF10A	ESTRADIOL METHYL ETHER	48	5000	3091	345.643	2935.31
MCF10A	NITRENDIPINE	48	10	3353	345.643	2935.31
MCF10A	ANASTROZOLE	48	5000	2082	345.643	2935.31
MCF10A	METHYLTHIOURACIL	48	10	3279	345.643	2935.31
MCF10A	IOXILAN	48	10	3398	345.643	2935.31
MCF10A	IODIXANOL	48	1000	3056	345.643	2935.31
MCF10A	beta-CYCLODEXTRIN	48	5000	3134	345.643	2935.31
MCF10A	'3-AMINO-1,2,4-TRIAZOLE'	48	100	3413	345.643	2935.31
MCF10A	MINOCYCLINE HYDROCHLORIDE	48	1	3601	345.643	2935.31
MCF10A	DESTHIOBIOTIN (+)	48	100	3446	345.643	2935.31
MCF10A	CHICAGO SKY BLUE	48	10	3642	345.643	2935.31
MCF10A	BENZALKONIUM CHLORIDE	48	1000	2756	345.643	2935.31
MCF10A	NEOMYCIN TRISULFATE	48	1	3284	345.643	2935.31
MCF10A	ARCAINE SULFATE	48	100	3282	345.643	2935.31
MCF10A	BENZALKONIUM CHLORIDE	48	1	2992	345.643	2935.31
MCF10A	IOXILAN	48	100	3695	345.643	2935.31
MCF10A	XANTHYLETIN	48	100	3157	345.643	2935.31
MCF10A	MINOCYCLINE HYDROCHLORIDE	48	5000	3549	345.643	2935.31
MCF10A	XANTHYLETIN	48	1000	2928	345.643	2935.31
MCF10A	BLEOMYCIN (bleomycin B2 shown)	48	5000	383	345.643	2935.31
MCF10A	CHICAGO SKY BLUE	48	1	3008	345.643	2935.31
MCF10A	METHYLDOPA	48	10	3712	345.643	2935.31
MCF10A	GIBBERELLIC ACID	48	1000	3260	345.643	2935.31
MCF10A	ECAMSULE TRIETHANOLAMINE	48	100	3082	345.643	2935.31
MCF10A	ANETHOLE	48	1000	3375	345.643	2935.31
MCF10A	GIBBERELLIC ACID	48	5000	3525	345.643	2935.31
MCF10A	ANASTROZOLE	48	100	2663	345.643	2935.31
MCF10A	XANTHYLETIN	48	1	3657	345.643	2935.31
MCF10A	PHENOXYBENZAMINE HYDROCHLORIDE	48	10	3212	345.643	2935.31
MCF10A	'3-AMINO-1,2,4-TRIAZOLE'	48	1	3307	345.643	2935.31
MCF10A	IODIXANOL	48	100	3202	345.643	2935.31
MCF10A	SODIUM THIOGLYCOLATE	48	100	3078	345.643	2935.31
MCF10A	PENTOXIFYLLINE	48	5000	3111	345.643	2935.31
MCF10A	DIMETRIDAZOLE	48	100	3373	345.643	2935.31
MCF10A	AMCINONIDE	48	10	3601	345.643	2935.31
MCF10A	NITRENDIPINE	48	1000	3017	345.643	2935.31
MCF10A	METHYLTHIOURACIL	48	1	3211	345.643	2935.31
MCF10A	DIMETRIDAZOLE	48	10	3126	345.643	2935.31
MCF10A	ANETHOLE	48	100	3858	345.643	2935.31
MCF10A	METHYLTHIOURACIL	48	100	3283	345.643	2935.31
MCF10A	7-NITROINDAZOLE	48	10	3070	345.643	2935.31
MCF10A	OXONITINE	48	1000	3099	345.643	2935.31
MCF10A	METHYLTHIOURACIL	48	1000	3626	345.643	2935.31
MCF10A	'3,4-DIDESMETHYL-5-DESHYDROXY-3-ETHOXYSCLEROIN'	48	10	3382	345.643	2935.31
MCF10A	ARCAINE SULFATE	48	10	3715	345.643	2935.31
MCF10A	THALIDOMIDE	48	10	3276	345.643	2935.31
MCF10A	BLEOMYCIN (bleomycin B2 shown)	48	100	1781	345.643	2935.31
MCF10A	NEOSTIGMINE BROMIDE	48	100	3288	345.643	2935.31
MCF10A	AURAPTENE	48	1000	3694	345.643	2935.31
MCF10A	BLEOMYCIN (bleomycin B2 shown)	48	1000	623	345.643	2935.31
MCF10A	IOXILAN	48	1	3561	345.643	2935.31
MCF10A	NAPROXEN	48	100	3130	345.643	2935.31
MCF10A	ACENOCOUMAROL	48	10	2949	345.643	2935.31
MCF10A	THIOPHANATE METHYL	48	10	3152	345.643	2935.31
MCF10A	VALERYL SALYCILATE	48	100	3340	345.643	2935.31
MCF10A	'2,3-DIHYDROXY-6,7-DICHLOROQUINOXALINE'	48	1000	3174	345.643	2935.31
MCF10A	ANETHOLE	48	10	3813	345.643	2935.31
MCF10A	'5,7,4-TRIMETHOXYFLAVONE'	48	1000	2537	345.643	2935.31
MCF10A	FORMONONETIN	48	5000	3145	345.643	2935.31
MCF10A	CHICAGO SKY BLUE	48	5000	2329	345.643	2935.31
MCF10A	BENZALKONIUM CHLORIDE	48	100	3321	345.643	2935.31
MCF10A	ACENOCOUMAROL	48	1000	3539	345.643	2935.31
MCF10A	METHYLTHIOURACIL	48	5000	3191	345.643	2935.31
MCF10A	IOHEXOL	48	1000	3078	345.643	2935.31
MCF10A	THALIDOMIDE	48	5000	3072	345.643	2935.31
MCF10A	IOXILAN	48	1000	3401	345.643	2935.31
MCF10A	ANTAZOLINE	48	1000	3496	345.643	2935.31
MCF10A	FORMONONETIN	48	1	3668	345.643	2935.31
MCF10A	KASUGAMYCIN HYDROCHLORIDE	48	1000	3463	345.643	2935.31
MCF10A	XANTHYLETIN	48	5000	3652	345.643	2935.31
MCF10A	DIBUTYL PHTHALATE	48	1000	2948	345.643	2935.31
MCF10A	NEOMYCIN TRISULFATE	48	5000	2946	345.643	2935.31
MCF10A	7-NITROINDAZOLE	48	1	3377	345.643	2935.31
MCF10A	AURAPTENE	48	100	3452	345.643	2935.31
MCF10A	SPIRAMYCIN	48	10	3026	345.643	2935.31
MCF10A	NEOSTIGMINE BROMIDE	48	5000	3351	345.643	2935.31
MCF10A	SODIUM THIOGLYCOLATE	48	5000	3261	345.643	2935.31
MCF10A	ESTRADIOL METHYL ETHER	48	1000	3069	345.643	2935.31
MCF10A	NITRENDIPINE	48	1	3618	345.643	2935.31
MCF10A	7-NITROINDAZOLE	48	5000	2517	345.643	2935.31
MCF10A	MARBOFLOXACIN	48	1	3117	345.643	2935.31
MCF10A	7-NITROINDAZOLE	48	1000	2821	345.643	2935.31
MCF10A	AURAPTENE	48	10	3241	345.643	2935.31
MCF10A	ACENOCOUMAROL	48	1	3683	345.643	2935.31
MCF10A	NITRENDIPINE	48	5000	3149	345.643	2935.31
MCF10A	SPIRAMYCIN	48	1000	3180	345.643	2935.31
MCF10A	VALERYL SALYCILATE	48	10	3317	345.643	2935.31
MCF10A	'3-AMINO-1,2,4-TRIAZOLE'	48	10	3396	345.643	2935.31
MCF10A	NEOHESPERIDIN DIHYDROCHALCONE	48	1000	3301	345.643	2935.31
MCF10A	PHENOXYBENZAMINE HYDROCHLORIDE	48	1	3148	345.643	2935.31
MCF10A	VALERYL SALYCILATE	48	1	3361	345.643	2935.31
MCF10A	IOXILAN	48	5000	3406	345.643	2935.31
MCF10A	AMCINONIDE	48	100	3470	345.643	2935.31
MCF10A	KASUGAMYCIN HYDROCHLORIDE	48	100	3322	345.643	2935.31
MCF10A	ECAMSULE TRIETHANOLAMINE	48	1000	2880	345.643	2935.31
MCF10A	'2,3-DIHYDROXY-6,7-DICHLOROQUINOXALINE'	48	5000	2884	345.643	2935.31
MCF10A	FORMONONETIN	48	100	3051	345.643	2935.31
MCF10A	THIOPHANATE METHYL	48	1000	2954	345.643	2935.31
MCF10A	THIOPHANATE METHYL	48	5000	3306	345.643	2935.31
MCF10A	DESTHIOBIOTIN (+)	48	1	3436	345.643	2935.31
MCF10A	'5,7,4-TRIMETHOXYFLAVONE'	48	10	3145	345.643	2935.31
MCF10A	NEOHESPERIDIN DIHYDROCHALCONE	48	10	3127	345.643	2935.31
MCF10A	'2,3-DIHYDROXY-6,7-DICHLOROQUINOXALINE'	48	1	3543	345.643	2935.31
MCF10A	OXONITINE	48	1	3085	345.643	2935.31
MCF10A	MINOCYCLINE HYDROCHLORIDE	48	10	3352	345.643	2935.31
MCF10A	NEOSTIGMINE BROMIDE	48	10	3506	345.643	2935.31
MCF10A	AMCINONIDE	48	1	2993	345.643	2935.31
MCF10A	PIMPINELLIN	48	1000	3111	345.643	2935.31
MCF10A	'2,3-DIHYDROXY-6,7-DICHLOROQUINOXALINE'	48	100	2987	345.643	2935.31
MCF10A	IODIXANOL	48	5000	3277	345.643	2935.31
MCF10A	PHENOXYBENZAMINE HYDROCHLORIDE	48	100	3113	345.643	2935.31
MCF10A	MARBOFLOXACIN	48	5000	2984	345.643	2935.31
MCF10A	AMCINONIDE	48	5000	3402	345.643	2935.31
MCF10A	SPIRAMYCIN	48	1	2867	345.643	2935.31
MCF10A	XANTHYLETIN	48	10	3494	345.643	2935.31
MCF10A	ANASTROZOLE	48	1000	3162	345.643	2935.31
MCF10A	MINOCYCLINE HYDROCHLORIDE	48	1000	3465	345.643	2935.31
MCF10A	IODIXANOL	48	10	3018	345.643	2935.31
MCF10A	IOHEXOL	48	1	3538	345.643	2935.31
MCF10A	KASUGAMYCIN HYDROCHLORIDE	48	10	3453	345.643	2935.31
MCF10A	DIBUTYL PHTHALATE	48	10	3104	345.643	2935.31
MCF10A	GIBBERELLIC ACID	48	10	3186	345.643	2935.31
MCF10A	OXONITINE	48	10	3551	345.643	2935.31
MCF10A	PIMPINELLIN	48	1	3140	345.643	2935.31
MCF10A	VALERYL SALYCILATE	48	5000	3119	345.643	2935.31
MCF10A	DIMETRIDAZOLE	48	1	2901	345.643	2935.31
MCF10A	ANASTROZOLE	48	1	2852	345.643	2935.31
MCF10A	PIMPINELLIN	48	100	3059	345.643	2935.31
MCF10A	METHYLDOPA	48	1	3006	345.643	2935.31
MCF10A	PENTOXIFYLLINE	48	10	3385	345.643	2935.31
MCF10A	NEOMYCIN TRISULFATE	48	100	2881	345.643	2935.31
MCF10A	'3-AMINO-1,2,4-TRIAZOLE'	48	1000	3594	345.643	2935.31
MCF10A	VALERYL SALYCILATE	48	1000	3094	345.643	2935.31
MCF10A	NAPROXEN	48	10	3034	345.643	2935.31
MCF10A	beta-CYCLODEXTRIN	48	100	3223	345.643	2935.31
MCF10A	IODIXANOL	48	1	3131	345.643	2935.31
MCF10A	MARBOFLOXACIN	48	100	3141	345.643	2935.31
MCF10A	beta-CYCLODEXTRIN	48	1	3281	345.643	2935.31
MCF10A	AURAPTENE	48	5000	3190	345.643	2935.31
MCF10A	SPIRAMYCIN	48	5000	3117	345.643	2935.31
MCF10A	THALIDOMIDE	48	100	3429	345.643	2935.31
MCF10A	DESTHIOBIOTIN (+)	48	10	3543	345.643	2935.31
MCF10A	MEPARFYLON	48	100	3689	345.643	3201.56
MCF10A	PIMETHIXENE MALEATE	48	5000	3154	345.643	3201.56
MCF10A	PROCODAZOLE	48	1000	3111	345.643	3201.56
MCF10A	METHOTREXATE(+/-)	48	5000	2014	345.643	3201.56
MCF10A	DIPERODON HYDROCHLORIDE	48	1	3092	345.643	3201.56
MCF10A	DIALLYL TRISULFIDE	48	1	3480	345.643	3201.56
MCF10A	ABIETIC ACID	48	1000	3139	345.643	3201.56
MCF10A	DICLAZURIL	48	1000	3707	345.643	3201.56
MCF10A	'2,5-DI-t-BUTYL-4-HYDROXYANISOLE'	48	1	3214	345.643	3201.56
MCF10A	TRIFLUPROMAZINE HYDROCHLORIDE	48	100	4026	345.643	3201.56
MCF10A	ABIETIC ACID	48	10	3569	345.643	3201.56
MCF10A	DICLAZURIL	48	5000	3203	345.643	3201.56
MCF10A	THYMOQUINONE	48	1	3255	345.643	3201.56
MCF10A	MEXENEONE	48	5000	3458	345.643	3201.56
MCF10A	NAPHAZOLINE HYDROCHLORIDE	48	10	3455	345.643	3201.56
MCF10A	BARBITAL	48	1	3448	345.643	3201.56
MCF10A	RASAGILINE	48	5000	3154	345.643	3201.56
MCF10A	TIOPRONIN	48	100	3350	345.643	3201.56
MCF10A	CLOPIDOGREL SULFATE	48	100	3554	345.643	3201.56
MCF10A	'2,5-DI-t-BUTYL-4-HYDROXYANISOLE'	48	5000	3884	345.643	3201.56
MCF10A	BARBITAL	48	10	3151	345.643	3201.56
MCF10A	PIMETHIXENE MALEATE	48	1000	3455	345.643	3201.56
MCF10A	MEPARFYLON	48	1	3222	345.643	3201.56
MCF10A	IRIGENIN TRIMETHYL ETHER	48	1000	3249	345.643	3201.56
MCF10A	ALENDRONATE SODIUM	48	1	3245	345.643	3201.56
MCF10A	NIACIN	48	100	3273	345.643	3201.56
MCF10A	MEPARFYLON	48	10	3539	345.643	3201.56
MCF10A	DIPERODON HYDROCHLORIDE	48	100	3393	345.643	3201.56
MCF10A	BUCETIN	48	1	3485	345.643	3201.56
MCF10A	L-DEOXYALLIIN	48	1	3785	345.643	3201.56
MCF10A	GUAIACOL	48	100	3242	345.643	3201.56
MCF10A	COLFORSIN	48	1	3763	345.643	3201.56
MCF10A	TIOPRONIN	48	1000	3873	345.643	3201.56
MCF10A	COLFORSIN	48	1000	3629	345.643	3201.56
MCF10A	IRIGENIN TRIMETHYL ETHER	48	1	3802	345.643	3201.56
MCF10A	DIALLYL TRISULFIDE	48	1000	3090	345.643	3201.56
MCF10A	3-ACETAMIDOCOUMARIN	48	5000	3651	345.643	3201.56
MCF10A	MOXALACTAM DISODIUM	48	5000	2696	345.643	3201.56
MCF10A	NITROFURANTOIN	48	5000	3395	345.643	3201.56
MCF10A	MEXAMINE	48	10	3514	345.643	3201.56
MCF10A	BARBITAL	48	1000	3247	345.643	3201.56
MCF10A	IRIGENIN TRIMETHYL ETHER	48	5000	3232	345.643	3201.56
MCF10A	THYMOQUINONE	48	100	3198	345.643	3201.56
MCF10A	GALANGIN 3-O-METHYL ETHER	48	100	3811	345.643	3201.56
MCF10A	NIACIN	48	5000	2756	345.643	3201.56
MCF10A	GUAIACOL	48	1	3169	345.643	3201.56
MCF10A	MOXALACTAM DISODIUM	48	100	3086	345.643	3201.56
MCF10A	COLFORSIN	48	10	3714	345.643	3201.56
MCF10A	URSOCHOLANIC ACID	48	100	3533	345.643	3201.56
MCF10A	COLFORSIN	48	5000	2790	345.643	3201.56
MCF10A	ALENDRONATE SODIUM	48	100	3545	345.643	3201.56
MCF10A	GUAIACOL	48	1000	3593	345.643	3201.56
MCF10A	RASAGILINE	48	100	3426	345.643	3201.56
MCF10A	PYRETHRINS	48	10	3501	345.643	3201.56
MCF10A	ALENDRONATE SODIUM	48	1000	3440	345.643	3201.56
MCF10A	CLOFIBRATE	48	5000	3862	345.643	3201.56
MCF10A	GALANGIN 3-O-METHYL ETHER	48	10	3842	345.643	3201.56
MCF10A	FESOTERODINE FUMARATE	48	1000	3581	345.643	3201.56
MCF10A	GALANGIN 3-O-METHYL ETHER	48	1000	3419	345.643	3201.56
MCF10A	FESOTERODINE FUMARATE	48	10	3359	345.643	3201.56
MCF10A	PIMETHIXENE MALEATE	48	10	3684	345.643	3201.56
MCF10A	EPRINOMECTIN	48	10	3578	345.643	3201.56
MCF10A	URSOCHOLANIC ACID	48	5000	3370	345.643	3201.56
MCF10A	3-ACETAMIDOCOUMARIN	48	10	3906	345.643	3201.56
MCF10A	QUEBRACHITOL	48	1000	3410	345.643	3201.56
MCF10A	NABUMETONE	48	1000	3333	345.643	3201.56
MCF10A	GUAIACOL	48	5000	3150	345.643	3201.56
MCF10A	DICLAZURIL	48	1	3225	345.643	3201.56
MCF10A	METHENAMINE	48	1000	3662	345.643	3201.56
MCF10A	3-ACETAMIDOCOUMARIN	48	1000	3679	345.643	3201.56
MCF10A	3-ACETAMIDOCOUMARIN	48	100	4013	345.643	3201.56
MCF10A	METHENAMINE	48	1	3555	345.643	3201.56
MCF10A	CLOPIDOGREL SULFATE	48	1000	2783	345.643	3201.56
MCF10A	DICLAZURIL	48	10	3892	345.643	3201.56
MCF10A	NAPHAZOLINE HYDROCHLORIDE	48	1	3364	345.643	3201.56
MCF10A	DIHYDROSTREPTOMYCIN [5mM]	48	100	3545	345.643	3201.56
MCF10A	GALANGIN 3-O-METHYL ETHER	48	5000	2757	345.643	3201.56
MCF10A	RACTOPAMINE HYDROCHLORIDE	48	1	3530	345.643	3201.56
MCF10A	METHOTREXATE(+/-)	48	1	3504	345.643	3201.56
MCF10A	TEMOZOLAMIDE	48	1000	3461	345.643	3201.56
MCF10A	NABUMETONE	48	100	3357	345.643	3201.56
MCF10A	METHOTREXATE(+/-)	48	1000	3280	345.643	3201.56
MCF10A	L-DEOXYALLIIN	48	100	3627	345.643	3201.56
MCF10A	FESOTERODINE FUMARATE	48	1	3264	345.643	3201.56
MCF10A	BUCETIN	48	1000	2956	345.643	3201.56
MCF10A	MOXALACTAM DISODIUM	48	10	3396	345.643	3201.56
MCF10A	RASAGILINE	48	1	3499	345.643	3201.56
MCF10A	PROCODAZOLE	48	10	2730	345.643	3201.56
MCF10A	DIHYDROSTREPTOMYCIN [5mM]	48	1	3937	345.643	3201.56
MCF10A	QUEBRACHITOL	48	5000	3379	345.643	3201.56
MCF10A	DIOSGENIN	48	10	3556	345.643	3201.56
MCF10A	DIOSGENIN	48	100	3562	345.643	3201.56
MCF10A	LEVONORGESTREL	48	5000	3652	345.643	3201.56
MCF10A	GUAIACOL	48	10	3146	345.643	3201.56
MCF10A	'N-METHYL (-)EPHEDRINE [1R,2S]'	48	1000	3551	345.643	3201.56
MCF10A	PYRETHRINS	48	100	3421	345.643	3201.56
MCF10A	CAFFEIC ACID	48	5000	3600	345.643	3201.56
MCF10A	TRIFLUPROMAZINE HYDROCHLORIDE	48	5000	3030	345.643	3201.56
MCF10A	3beta-HYDROXYISOALLOSPIROST-9(11)-ENE	48	100	3771	345.643	3201.56
MCF10A	ABIETIC ACID	48	1	3803	345.643	3201.56
MCF10A	DIOSGENIN	48	1	3532	345.643	3201.56
MCF10A	'2,5-DI-t-BUTYL-4-HYDROXYANISOLE'	48	100	3113	345.643	3201.56
MCF10A	CLOPIDOGREL SULFATE	48	5000	3882	345.643	3201.56
MCF10A	MEXAMINE	48	1000	3634	345.643	3201.56
MCF10A	IDOXURIDINE	48	1000	3398	345.643	3201.56
MCF10A	METHOTREXATE(+/-)	48	10	3022	345.643	3201.56
MCF10A	AMOROLFINE HYDROCHLORIDE	48	10	3605	345.643	3201.56
MCF10A	TRIFLUPROMAZINE HYDROCHLORIDE	48	1000	3878	345.643	3201.56
MCF10A	RACTOPAMINE HYDROCHLORIDE	48	1000	3297	345.643	3201.56
MCF10A	'N-METHYL (-)EPHEDRINE [1R,2S]'	48	1	3684	345.643	3201.56
MCF10A	RASAGILINE	48	1000	3988	345.643	3201.56
MCF10A	TIOPRONIN	48	1	3432	345.643	3201.56
MCF10A	'N-METHYL (-)EPHEDRINE [1R,2S]'	48	100	3894	345.643	3201.56
MCF10A	MOXALACTAM DISODIUM	48	1000	3290	345.643	3201.56
MCF10A	NITROFURANTOIN	48	10	3355	345.643	3201.56
MCF10A	PIMETHIXENE MALEATE	48	1	3470	345.643	3201.56
MCF10A	DIHYDROSTREPTOMYCIN [5mM]	48	10	3655	345.643	3201.56
MCF10A	TEMOZOLAMIDE	48	1	3554	345.643	3201.56
MCF10A	IDOXURIDINE	48	100	3693	345.643	3201.56
MCF10A	PROCODAZOLE	48	100	3255	345.643	3201.56
MCF10A	AMOROLFINE HYDROCHLORIDE	48	1000	3392	345.643	3201.56
MCF10A	CLOFIBRATE	48	1000	3532	345.643	3201.56
MCF10A	ESTRIOL TRIACETATE	48	1000	3421	345.643	3201.56
MCF10A	LEVONORGESTREL	48	1	3265	345.643	3201.56
MCF10A	ESTRIOL TRIACETATE	48	100	3341	345.643	3201.56
MCF10A	AMOROLFINE HYDROCHLORIDE	48	1	3343	345.643	3201.56
MCF10A	RACTOPAMINE HYDROCHLORIDE	48	100	3136	345.643	3201.56
MCF10A	CLOPIDOGREL SULFATE	48	10	3522	345.643	3201.56
MCF10A	LEVONORGESTREL	48	10	3403	345.643	3201.56
MCF10A	NIACIN	48	1000	2858	345.643	3201.56
MCF10A	ABIETIC ACID	48	100	3978	345.643	3201.56
MCF10A	METHOTREXATE(+/-)	48	100	3405	345.643	3201.56
MCF10A	'2,5-DI-t-BUTYL-4-HYDROXYANISOLE'	48	10	3490	345.643	3201.56
MCF10A	DIOSGENIN	48	5000	2408	345.643	3201.56
MCF10A	DIALLYL TRISULFIDE	48	100	3625	345.643	3201.56
MCF10A	TEMOZOLAMIDE	48	10	3394	345.643	3201.56
MCF10A	BARBITAL	48	100	3590	345.643	3201.56
MCF10A	DIOSGENIN	48	1000	3541	345.643	3201.56
MCF10A	EPRINOMECTIN	48	100	3705	345.643	3201.56
MCF10A	METHENAMINE	48	100	3317	345.643	3201.56
MCF10A	RASAGILINE	48	10	3553	345.643	3201.56
MCF10A	DIALLYL TRISULFIDE	48	5000	2267	345.643	3201.56
MCF10A	METHENAMINE	48	10	3443	345.643	3201.56
MCF10A	NIACIN	48	1	2757	345.643	3201.56
MCF10A	CAFFEIC ACID	48	1000	3530	345.643	3201.56
MCF10A	PIMETHIXENE MALEATE	48	100	3726	345.643	3201.56
MCF10A	FESOTERODINE FUMARATE	48	5000	3581	345.643	3201.56
MCF10A	ALENDRONATE SODIUM	48	5000	3608	345.643	3201.56
MCF10A	CLOFIBRATE	48	1	3344	345.643	3201.56
MCF10A	3beta-HYDROXYISOALLOSPIROST-9(11)-ENE	48	1	3640	345.643	3201.56
MCF10A	DIALLYL TRISULFIDE	48	10	3557	345.643	3201.56
MCF10A	CLOPIDOGREL SULFATE	48	1	2896	345.643	3201.56
MCF10A	CAFFEIC ACID	48	1	3410	345.643	3201.56
MCF10A	MOXALACTAM DISODIUM	48	1	2917	345.643	3201.56
MCF10A	RACTOPAMINE HYDROCHLORIDE	48	5000	3432	345.643	3201.56
MCF10A	THYMOQUINONE	48	1000	2934	345.643	3201.56
MCF10A	QUEBRACHITOL	48	100	3776	345.643	3201.56
MCF10A	NITROFURANTOIN	48	100	3857	345.643	3201.56
MCF10A	NABUMETONE	48	1	3387	345.643	3201.56
MCF10A	MEXAMINE	48	100	2969	345.643	3201.56
MCF10A	NAPHAZOLINE HYDROCHLORIDE	48	5000	3292	345.643	3201.56
MCF10A	TEMOZOLAMIDE	48	5000	3384	345.643	3201.56
MCF10A	PYRETHRINS	48	5000	2653	345.643	3201.56
MCF10A	EPRINOMECTIN	48	1000	3036	345.643	3201.56
MCF10A	LEVONORGESTREL	48	100	3507	345.643	3201.56
MCF10A	CLOFIBRATE	48	100	3255	345.643	3201.56
MCF10A	TRIFLUPROMAZINE HYDROCHLORIDE	48	10	3823	345.643	3201.56
MCF10A	L-DEOXYALLIIN	48	10	4060	345.643	3201.56
MCF10A	NAPHAZOLINE HYDROCHLORIDE	48	100	3324	345.643	3201.56
MCF10A	3-ACETAMIDOCOUMARIN	48	1	3657	345.643	3201.56
MCF10A	METHENAMINE	48	5000	3476	345.643	3201.56
MCF10A	BUCETIN	48	100	3027	345.643	3201.56
MCF10A	PROCODAZOLE	48	1	3296	345.643	3201.56
MCF10A	3beta-HYDROXYISOALLOSPIROST-9(11)-ENE	48	1000	3376	345.643	3201.56
MCF10A	CAFFEIC ACID	48	100	3121	345.643	3201.56
MCF10A	IRIGENIN TRIMETHYL ETHER	48	10	3124	345.643	3201.56
MCF10A	URSOCHOLANIC ACID	48	1000	3443	345.643	3201.56
MCF10A	IDOXURIDINE	48	10	3415	345.643	3201.56
MCF10A	DIHYDROSTREPTOMYCIN [5mM]	48	5000	3569	345.643	3201.56
MCF10A	PROCODAZOLE	48	5000	3146	345.643	3201.56
MCF10A	BARBITAL	48	5000	2848	345.643	3201.56
MCF10A	DIPERODON HYDROCHLORIDE	48	5000	3405	345.643	3201.56
MCF10A	ESTRIOL TRIACETATE	48	10	3010	345.643	3201.56
MCF10A	BUCETIN	48	5000	2461	345.643	3201.56
MCF10A	NABUMETONE	48	5000	3445	345.643	3201.56
MCF10A	LEVONORGESTREL	48	1000	3387	345.643	3201.56
MCF10A	DICLAZURIL	48	100	3609	345.643	3201.56
MCF10A	ABIETIC ACID	48	5000	3298	345.643	3201.56
MCF10A	MEXENEONE	48	1	3470	345.643	3201.56
MCF10A	MEPARFYLON	48	5000	3371	345.643	3201.56
MCF10A	NIACIN	48	10	3320	345.643	3201.56
MCF10A	3beta-HYDROXYISOALLOSPIROST-9(11)-ENE	48	5000	3805	345.643	3201.56
MCF10A	PYRETHRINS	48	1000	3185	345.643	3201.56
MCF10A	EPRINOMECTIN	48	5000	3705	345.643	3201.56
MCF10A	PYRETHRINS	48	1	2465	345.643	3201.56
MCF10A	URSOCHOLANIC ACID	48	10	3356	345.643	3201.56
MCF10A	TEMOZOLAMIDE	48	100	3061	345.643	3201.56
MCF10A	TRIFLUPROMAZINE HYDROCHLORIDE	48	1	3347	345.643	3201.56
MCF10A	IDOXURIDINE	48	5000	2830	345.643	3201.56
MCF10A	ESTRIOL TRIACETATE	48	5000	3583	345.643	3201.56
MCF10A	THYMOQUINONE	48	10	3519	345.643	3201.56
MCF10A	TIOPRONIN	48	5000	2966	345.643	3201.56
MCF10A	ESTRIOL TRIACETATE	48	1	3274	345.643	3201.56
MCF10A	3beta-HYDROXYISOALLOSPIROST-9(11)-ENE	48	10	3892	345.643	3201.56
MCF10A	'2,5-DI-t-BUTYL-4-HYDROXYANISOLE'	48	1000	3469	345.643	3201.56
MCF10A	DIPERODON HYDROCHLORIDE	48	1000	3484	345.643	3201.56
MCF10A	MEXAMINE	48	1	3100	345.643	3201.56
MCF10A	CLOFIBRATE	48	10	3480	345.643	3201.56
MCF10A	L-DEOXYALLIIN	48	1000	3231	345.643	3201.56
MCF10A	COLFORSIN	48	100	3573	345.643	3201.56
MCF10A	NITROFURANTOIN	48	1000	3431	345.643	3201.56
MCF10A	QUEBRACHITOL	48	1	3071	345.643	3201.56
MCF10A	DIPERODON HYDROCHLORIDE	48	10	3386	345.643	3201.56
MCF10A	AMOROLFINE HYDROCHLORIDE	48	100	3507	345.643	3201.56
MCF10A	MEXENEONE	48	1000	3471	345.643	3201.56
MCF10A	MEPARFYLON	48	1000	3435	345.643	3201.56
MCF10A	THYMOQUINONE	48	5000	3599	345.643	3201.56
MCF10A	IRIGENIN TRIMETHYL ETHER	48	100	3408	345.643	3201.56
MCF10A	TIOPRONIN	48	10	3438	345.643	3201.56
MCF10A	MEXENEONE	48	10	3784	345.643	3201.56
MCF10A	DIHYDROSTREPTOMYCIN [5mM]	48	1000	3553	345.643	3201.56
MCF10A	MEXAMINE	48	5000	3468	345.643	3201.56
MCF10A	NABUMETONE	48	10	3344	345.643	3201.56
MCF10A	NAPHAZOLINE HYDROCHLORIDE	48	1000	3683	345.643	3201.56
MCF10A	GALANGIN 3-O-METHYL ETHER	48	1	3457	345.643	3201.56
MCF10A	AMOROLFINE HYDROCHLORIDE	48	5000	3452	345.643	3201.56
MCF10A	FESOTERODINE FUMARATE	48	100	3627	345.643	3201.56
MCF10A	CAFFEIC ACID	48	10	3231	345.643	3201.56
MCF10A	BUCETIN	48	10	3683	345.643	3201.56
MCF10A	EPRINOMECTIN	48	1	3088	345.643	3201.56
MCF10A	IDOXURIDINE	48	1	4001	345.643	3201.56
MCF10A	QUEBRACHITOL	48	10	3766	345.643	3201.56
MCF10A	NITROFURANTOIN	48	1	3237	345.643	3201.56
MCF10A	'N-METHYL (-)EPHEDRINE [1R,2S]'	48	5000	3426	345.643	3201.56
MCF10A	URSOCHOLANIC ACID	48	1	3097	345.643	3201.56
MCF10A	MEXENEONE	48	100	3173	345.643	3201.56
MCF10A	ALENDRONATE SODIUM	48	10	3448	345.643	3201.56
MCF10A	RACTOPAMINE HYDROCHLORIDE	48	10	2962	345.643	3201.56
MCF10A	'N-METHYL (-)EPHEDRINE [1R,2S]'	48	10	3285	345.643	3201.56
MCF10A	L-DEOXYALLIIN	48	5000	4013	345.643	3201.56
MCF10A	QUINALIZARIN	48	1	3393	345.643	3346
MCF10A	4-METHOXYFLAVONE	48	10	3643	345.643	3346
MCF10A	EPICHOLESTANOL	48	5000	2558	345.643	3346
MCF10A	SPARFLOXACIN	48	10	3389	345.643	3346
MCF10A	DROSPIRENONE	48	1000	3559	345.643	3346
MCF10A	GANCICLOVIR HYDRATE	48	10	3510	345.643	3346
MCF10A	EPICHOLESTANOL	48	1000	3739	345.643	3346
MCF10A	KOPARIN	48	100	3233	345.643	3346
MCF10A	BACLOFEN HYDROCHLORIDE (+/-)	48	100	3259	345.643	3346
MCF10A	DIBENZOYLMETHANE	48	100	3359	345.643	3346
MCF10A	alpha-METHYL-L-TYROSINE	48	1	3541	345.643	3346
MCF10A	HUPERZINE A	48	5000	4002	345.643	3346
MCF10A	CARMOFUR	48	10	3841	345.643	3346
MCF10A	PICEID	48	5000	3844	345.643	3346
MCF10A	MATRINE	48	5000	3499	345.643	3346
MCF10A	RHOIFOLIN	48	5000	3711	345.643	3346
MCF10A	PHENOLSULFONPHTHALEIN	48	100	3844	345.643	3346
MCF10A	PHYSOSTIGMINE SALICYLATE	48	100	3702	345.643	3346
MCF10A	ZALCITABINE	48	1	3428	345.643	3346
MCF10A	PICEID	48	100	3654	345.643	3346
MCF10A	ANTHOTHECOL	48	1	3576	345.643	3346
MCF10A	alpha-METHYL-L-TYROSINE	48	1000	3643	345.643	3346
MCF10A	IMIDAZOL-4-YLACETIC ACID SODIUM SALT	48	1	3563	345.643	3346
MCF10A	alpha-METHYL-L-TYROSINE	48	5000	3419	345.643	3346
MCF10A	TAZOBACTAM	48	100	3424	345.643	3346
MCF10A	MATRINE	48	10	3480	345.643	3346
MCF10A	PRIMULETIN	48	10	3586	345.643	3346
MCF10A	SISOMICIN SULFATE	48	1	2904	345.643	3346
MCF10A	DOXOFYLLINE	48	1000	3778	345.643	3346
MCF10A	PHYSOSTIGMINE SALICYLATE	48	10	3670	345.643	3346
MCF10A	DIBENZOYLMETHANE	48	1	3566	345.643	3346
MCF10A	4-METHOXYFLAVONE	48	100	3509	345.643	3346
MCF10A	MATRINE	48	100	4015	345.643	3346
MCF10A	METHOCARBAMOL	48	1	3522	345.643	3346
MCF10A	CARMOFUR	48	1000	2833	345.643	3346
MCF10A	BACLOFEN HYDROCHLORIDE (+/-)	48	1000	3536	345.643	3346
MCF10A	BACLOFEN HYDROCHLORIDE (+/-)	48	5000	3204	345.643	3346
MCF10A	KOPARIN	48	10	3482	345.643	3346
MCF10A	BALSALAZIDE DISODIUM	48	1	3958	345.643	3346
MCF10A	ROSOLIC ACID	48	1000	3528	345.643	3346
MCF10A	PICROTOXININ	48	100	3777	345.643	3346
MCF10A	LUMIRACOXIB	48	10	3621	345.643	3346
MCF10A	PRENYLETIN	48	10	3204	345.643	3346
MCF10A	LUMIRACOXIB	48	100	3473	345.643	3346
MCF10A	BALSALAZIDE DISODIUM	48	5000	3845	345.643	3346
MCF10A	GANCICLOVIR HYDRATE	48	100	3487	345.643	3346
MCF10A	EPIGALLOCATECHIN	48	100	3634	345.643	3346
MCF10A	TAZOBACTAM	48	5000	3579	345.643	3346
MCF10A	CHOLESTERYL HEMISUCCINATE	48	1000	3189	345.643	3346
MCF10A	EPIGALLOCATECHIN	48	1	3583	345.643	3346
MCF10A	METHIONINE SULFOXIMINE (L)	48	1000	3288	345.643	3346
MCF10A	PHENFORMIN HYDROCHLORIDE	48	10	3660	345.643	3346
MCF10A	PHENOLSULFONPHTHALEIN	48	1000	3928	345.643	3346
MCF10A	IMIDAZOL-4-YLACETIC ACID SODIUM SALT	48	1000	2925	345.643	3346
MCF10A	RESORCINOL MONOACETATE	48	10	3753	345.643	3346
MCF10A	DOXOFYLLINE	48	5000	3624	345.643	3346
MCF10A	NAFCILLIN SODIUM	48	10	3835	345.643	3346
MCF10A	ZALCITABINE	48	100	3652	345.643	3346
MCF10A	ESTRADIOL DIACETATE	48	1000	3432	345.643	3346
MCF10A	ESTRADIOL DIACETATE	48	5000	3275	345.643	3346
MCF10A	PICROTOXININ	48	10	3067	345.643	3346
MCF10A	LUMIRACOXIB	48	1	3118	345.643	3346
MCF10A	RESORCINOL MONOACETATE	48	100	3382	345.643	3346
MCF10A	2-ACETAMIDOFLUORENE	48	100	3557	345.643	3346
MCF10A	p-FLUOROPHENYLALANINE	48	1	3639	345.643	3346
MCF10A	TRICHLOROETHYLENE	48	5000	3099	345.643	3346
MCF10A	'2,6-DIHYDROXY-4-METHOXY-ACETOPHENONE'	48	10	3326	345.643	3346
MCF10A	HUPERZINE A	48	10	3926	345.643	3346
MCF10A	DOXOFYLLINE	48	100	3679	345.643	3346
MCF10A	ZALCITABINE	48	5000	3046	345.643	3346
MCF10A	SISOMICIN SULFATE	48	1000	3176	345.643	3346
MCF10A	SPARFLOXACIN	48	100	3440	345.643	3346
MCF10A	RESORCINOL MONOACETATE	48	1000	3838	345.643	3346
MCF10A	NAFCILLIN SODIUM	48	1000	3658	345.643	3346
MCF10A	CARMOFUR	48	5000	2330	345.643	3346
MCF10A	ESTRADIOL DIACETATE	48	100	3459	345.643	3346
MCF10A	RHOIFOLIN	48	1	3379	345.643	3346
MCF10A	TRICHLOROETHYLENE	48	100	3664	345.643	3346
MCF10A	DIBENZOYLMETHANE	48	10	4027	345.643	3346
MCF10A	PHYSOSTIGMINE SALICYLATE	48	5000	4066	345.643	3346
MCF10A	BENZO[a]PYRENE	48	10	3919	345.643	3346
MCF10A	4-METHOXYFLAVONE	48	1	3765	345.643	3346
MCF10A	'2,6-DIHYDROXY-4-METHOXY-ACETOPHENONE'	48	100	3321	345.643	3346
MCF10A	CORALYNE CHLORIDE	48	1000	3476	345.643	3346
MCF10A	EPICHOLESTANOL	48	10	3559	345.643	3346
MCF10A	ROSOLIC ACID	48	1	3914	345.643	3346
MCF10A	METHIONINE SULFOXIMINE (L)	48	5000	3495	345.643	3346
MCF10A	alpha-CYANO-4-HYDROXYCINNAMIC ACID	48	5000	3396	345.643	3346
MCF10A	PHENFORMIN HYDROCHLORIDE	48	100	2962	345.643	3346
MCF10A	alpha-CYANO-4-HYDROXYCINNAMIC ACID	48	10	3688	345.643	3346
MCF10A	PHENFORMIN HYDROCHLORIDE	48	1000	2928	345.643	3346
MCF10A	METHOCARBAMOL	48	100	3571	345.643	3346
MCF10A	ANTHOTHECOL	48	1000	3247	345.643	3346
MCF10A	ZALCITABINE	48	10	3276	345.643	3346
MCF10A	METHOCARBAMOL	48	5000	2251	345.643	3346
MCF10A	DROSPIRENONE	48	1	3437	345.643	3346
MCF10A	DROSPIRENONE	48	100	3399	345.643	3346
MCF10A	SISOMICIN SULFATE	48	100	3224	345.643	3346
MCF10A	MATRINE	48	1	3448	345.643	3346
MCF10A	BENZO[a]PYRENE	48	1000	3798	345.643	3346
MCF10A	SISOMICIN SULFATE	48	5000	2858	345.643	3346
MCF10A	CORALYNE CHLORIDE	48	10	3423	345.643	3346
MCF10A	PHYSOSTIGMINE SALICYLATE	48	1	3623	345.643	3346
MCF10A	RHOIFOLIN	48	100	3070	345.643	3346
MCF10A	DROSPIRENONE	48	5000	3829	345.643	3346
MCF10A	PICROTOXININ	48	1000	2862	345.643	3346
MCF10A	ROSOLIC ACID	48	10	3665	345.643	3346
MCF10A	'2,6-DIHYDROXY-4-METHOXY-ACETOPHENONE'	48	1000	3878	345.643	3346
MCF10A	alpha-CYANO-4-HYDROXYCINNAMIC ACID	48	1	3734	345.643	3346
MCF10A	PRENYLETIN	48	5000	3114	345.643	3346
MCF10A	CHOLESTERYL HEMISUCCINATE	48	100	3801	345.643	3346
MCF10A	PHYSOSTIGMINE SALICYLATE	48	1000	3809	345.643	3346
MCF10A	p-FLUOROPHENYLALANINE	48	100	3871	345.643	3346
MCF10A	CHRYSIN	48	100	3365	345.643	3346
MCF10A	DOXOFYLLINE	48	10	3874	345.643	3346
MCF10A	BENZO[a]PYRENE	48	5000	3686	345.643	3346
MCF10A	ANTHOTHECOL	48	5000	135	345.643	3346
MCF10A	NAFCILLIN SODIUM	48	100	3866	345.643	3346
MCF10A	QUINALIZARIN	48	1000	3491	345.643	3346
MCF10A	KOPARIN	48	1000	3794	345.643	3346
MCF10A	METHIONINE SULFOXIMINE (L)	48	100	3734	345.643	3346
MCF10A	CARMOFUR	48	100	3484	345.643	3346
MCF10A	IMIDAZOL-4-YLACETIC ACID SODIUM SALT	48	10	3812	345.643	3346
MCF10A	PRENYLETIN	48	1	3365	345.643	3346
MCF10A	RHOIFOLIN	48	1000	3532	345.643	3346
MCF10A	CHRYSIN	48	1000	3481	345.643	3346
MCF10A	alpha-METHYL-L-TYROSINE	48	100	3751	345.643	3346
MCF10A	PHENOLSULFONPHTHALEIN	48	1	3717	345.643	3346
MCF10A	2-ACETAMIDOFLUORENE	48	5000	3526	345.643	3346
MCF10A	PICROTOXININ	48	1	3288	345.643	3346
MCF10A	DROSPIRENONE	48	10	3602	345.643	3346
MCF10A	CYTIDINE	48	1000	3664	345.643	3346
MCF10A	p-FLUOROPHENYLALANINE	48	5000	2877	345.643	3346
MCF10A	TRICHLOROETHYLENE	48	10	3387	345.643	3346
MCF10A	CEFTAZIDIME	48	10	3504	345.643	3346
MCF10A	TAZOBACTAM	48	10	3413	345.643	3346
MCF10A	CHOLESTERYL HEMISUCCINATE	48	10	3858	345.643	3346
MCF10A	ESTRADIOL DIACETATE	48	10	3517	345.643	3346
MCF10A	CORALYNE CHLORIDE	48	5000	3080	345.643	3346
MCF10A	'2,6-DIHYDROXY-4-METHOXY-ACETOPHENONE'	48	5000	3476	345.643	3346
MCF10A	METHIONINE SULFOXIMINE (L)	48	10	3680	345.643	3346
MCF10A	LUMIRACOXIB	48	5000	3429	345.643	3346
MCF10A	GANCICLOVIR HYDRATE	48	5000	3340	345.643	3346
MCF10A	TAZOBACTAM	48	1000	3694	345.643	3346
MCF10A	QUINALIZARIN	48	100	3005	345.643	3346
MCF10A	4-METHOXYFLAVONE	48	1000	3954	345.643	3346
MCF10A	SPARFLOXACIN	48	1	3118	345.643	3346
MCF10A	EPIGALLOCATECHIN	48	5000	3188	345.643	3346
MCF10A	PRIMULETIN	48	1	3693	345.643	3346
MCF10A	GANCICLOVIR HYDRATE	48	1000	3382	345.643	3346
MCF10A	BENZO[a]PYRENE	48	1	3702	345.643	3346
MCF10A	IMIDAZOL-4-YLACETIC ACID SODIUM SALT	48	100	3411	345.643	3346
MCF10A	6-AMINONICOTINAMIDE	48	10	3849	345.643	3346
MCF10A	CHOLESTERYL HEMISUCCINATE	48	5000	2996	345.643	3346
MCF10A	6-AMINONICOTINAMIDE	48	1	3446	345.643	3346
MCF10A	METHOCARBAMOL	48	1000	3072	345.643	3346
MCF10A	PICEID	48	1	3553	345.643	3346
MCF10A	METHIONINE SULFOXIMINE (L)	48	1	3563	345.643	3346
MCF10A	6-AMINONICOTINAMIDE	48	100	3744	345.643	3346
MCF10A	CEFTAZIDIME	48	100	3528	345.643	3346
MCF10A	NAFCILLIN SODIUM	48	1	3190	345.643	3346
MCF10A	p-FLUOROPHENYLALANINE	48	1000	3033	345.643	3346
MCF10A	DOXOFYLLINE	48	1	3604	345.643	3346
MCF10A	HUPERZINE A	48	100	3956	345.643	3346
MCF10A	KOPARIN	48	1	3667	345.643	3346
MCF10A	TAZOBACTAM	48	1	3456	345.643	3346
MCF10A	ROSOLIC ACID	48	100	3693	345.643	3346
MCF10A	PHENOLSULFONPHTHALEIN	48	5000	2606	345.643	3346
MCF10A	CEFTAZIDIME	48	5000	3767	345.643	3346
MCF10A	BACLOFEN HYDROCHLORIDE (+/-)	48	1	3279	345.643	3346
MCF10A	2-ACETAMIDOFLUORENE	48	10	3760	345.643	3346
MCF10A	p-FLUOROPHENYLALANINE	48	10	3442	345.643	3346
MCF10A	CORALYNE CHLORIDE	48	1	3402	345.643	3346
MCF10A	MATRINE	48	1000	3616	345.643	3346
MCF10A	PICROTOXININ	48	5000	3264	345.643	3346
MCF10A	CHRYSIN	48	5000	2963	345.643	3346
MCF10A	PICEID	48	1000	3577	345.643	3346
MCF10A	QUINALIZARIN	48	10	3293	345.643	3346
MCF10A	EPIGALLOCATECHIN	48	1000	3537	345.643	3346
MCF10A	RESORCINOL MONOACETATE	48	5000	3507	345.643	3346
MCF10A	SPARFLOXACIN	48	1000	3479	345.643	3346
MCF10A	'2,6-DIHYDROXY-4-METHOXY-ACETOPHENONE'	48	1	3519	345.643	3346
MCF10A	IMIDAZOL-4-YLACETIC ACID SODIUM SALT	48	5000	3473	345.643	3346
MCF10A	PHENFORMIN HYDROCHLORIDE	48	1	3306	345.643	3346
MCF10A	SISOMICIN SULFATE	48	10	3492	345.643	3346
MCF10A	METHOCARBAMOL	48	10	4023	345.643	3346
MCF10A	CHOLESTERYL HEMISUCCINATE	48	1	3691	345.643	3346
MCF10A	CYTIDINE	48	100	3787	345.643	3346
MCF10A	HUPERZINE A	48	1000	4025	345.643	3346
MCF10A	6-AMINONICOTINAMIDE	48	5000	1734	345.643	3346
MCF10A	PHENOLSULFONPHTHALEIN	48	10	3275	345.643	3346
MCF10A	2-ACETAMIDOFLUORENE	48	1000	3537	345.643	3346
MCF10A	PRENYLETIN	48	100	3220	345.643	3346
MCF10A	ROSOLIC ACID	48	5000	3396	345.643	3346
MCF10A	CORALYNE CHLORIDE	48	100	3618	345.643	3346
MCF10A	LUMIRACOXIB	48	1000	3054	345.643	3346
MCF10A	RHOIFOLIN	48	10	3555	345.643	3346
MCF10A	BALSALAZIDE DISODIUM	48	1000	3741	345.643	3346
MCF10A	ANTHOTHECOL	48	10	2762	345.643	3346
MCF10A	CARMOFUR	48	1	3558	345.643	3346
MCF10A	CHRYSIN	48	1	3388	345.643	3346
MCF10A	PRIMULETIN	48	5000	4238	345.643	3346
MCF10A	CYTIDINE	48	1	3568	345.643	3346
MCF10A	alpha-CYANO-4-HYDROXYCINNAMIC ACID	48	1000	3442	345.643	3346
MCF10A	BALSALAZIDE DISODIUM	48	100	3781	345.643	3346
MCF10A	CYTIDINE	48	5000	3538	345.643	3346
MCF10A	EPICHOLESTANOL	48	1	3366	345.643	3346
MCF10A	CYTIDINE	48	10	3831	345.643	3346
MCF10A	PRENYLETIN	48	1000	3227	345.643	3346
MCF10A	PRIMULETIN	48	1000	4256	345.643	3346
MCF10A	ANTHOTHECOL	48	100	3510	345.643	3346
MCF10A	alpha-METHYL-L-TYROSINE	48	10	3635	345.643	3346
MCF10A	DIBENZOYLMETHANE	48	1000	3786	345.643	3346
MCF10A	QUINALIZARIN	48	5000	3642	345.643	3346
MCF10A	DIBENZOYLMETHANE	48	5000	2991	345.643	3346
MCF10A	PICEID	48	10	3437	345.643	3346
MCF10A	6-AMINONICOTINAMIDE	48	1000	3617	345.643	3346
MCF10A	CEFTAZIDIME	48	1000	3375	345.643	3346
MCF10A	BENZO[a]PYRENE	48	100	3382	345.643	3346
MCF10A	ZALCITABINE	48	1000	3510	345.643	3346
MCF10A	CHRYSIN	48	10	3108	345.643	3346
MCF10A	2-ACETAMIDOFLUORENE	48	1	3425	345.643	3346
MCF10A	EPIGALLOCATECHIN	48	10	3508	345.643	3346
MCF10A	TRICHLOROETHYLENE	48	1000	3400	345.643	3346
MCF10A	HUPERZINE A	48	1	3052	345.643	3346
MCF10A	PHENFORMIN HYDROCHLORIDE	48	5000	3270	345.643	3346
MCF10A	EPICHOLESTANOL	48	100	3412	345.643	3346
MCF10A	RESORCINOL MONOACETATE	48	1	3414	345.643	3346
MCF10A	BALSALAZIDE DISODIUM	48	10	3624	345.643	3346
MCF10A	KOPARIN	48	5000	3592	345.643	3346
MCF10A	BACLOFEN HYDROCHLORIDE (+/-)	48	10	3761	345.643	3346
MCF10A	4-METHOXYFLAVONE	48	5000	3630	345.643	3346
MCF10A	CEFTAZIDIME	48	1	3626	345.643	3346
MCF10A	PRIMULETIN	48	100	4032	345.643	3346
MCF10A	TRICHLOROETHYLENE	48	1	3807	345.643	3346
MCF10A	GANCICLOVIR HYDRATE	48	1	3225	345.643	3346
MCF10A	NAFCILLIN SODIUM	48	5000	3118	345.643	3346
MCF10A	SPARFLOXACIN	48	5000	3266	345.643	3346
MCF10A	alpha-CYANO-4-HYDROXYCINNAMIC ACID	48	100	3911	345.643	3346
MCF10A	ESTRADIOL DIACETATE	48	1	3794	345.643	3346
MCF10A	PALIPERIDONE	48	1000	3851	345.643	3394.64
MCF10A	ANABASINE HYDROCHLORIDE	48	10	3686	345.643	3394.64
MCF10A	'3,6-DIMETHOXYFLAVONE'	48	100	3313	345.643	3394.64
MCF10A	ANABASINE HYDROCHLORIDE	48	5000	3173	345.643	3394.64
MCF10A	VIOLASTYRENE	48	1000	3966	345.643	3394.64
MCF10A	CULMORIN	48	100	3687	345.643	3394.64
MCF10A	CALCEIN	48	1000	3482	345.643	3394.64
MCF10A	DUARTIN (-)	48	1000	4045	345.643	3394.64
MCF10A	d-LIMONENE	48	1000	3745	345.643	3394.64
MCF10A	NARINGENIN	48	5000	3667	345.643	3394.64
MCF10A	SELAMECTIN	48	10	4013	345.643	3394.64
MCF10A	IZALPININ	48	5000	4100	345.643	3394.64
MCF10A	OFLOXACIN	48	10	3598	345.643	3394.64
MCF10A	BRAZILIN	48	5000	3355	345.643	3394.64
MCF10A	FURALTADONE	48	100	3529	345.643	3394.64
MCF10A	ANDIROBIN	48	100	4094	345.643	3394.64
MCF10A	STROPHANTHIDIN	48	100	3885	345.643	3394.64
MCF10A	THEAFLAVIN	48	5000	3598	345.643	3394.64
MCF10A	OLSALAZINE SODIUM	48	5000	3544	345.643	3394.64
MCF10A	2-ACETYLPYRROLE	48	5000	3444	345.643	3394.64
MCF10A	SELAMECTIN	48	100	4325	345.643	3394.64
MCF10A	ADAPALENE	48	10	3630	345.643	3394.64
MCF10A	ANDIROBIN	48	10	3619	345.643	3394.64
MCF10A	ADELMIDROL	48	100	3936	345.643	3394.64
MCF10A	LEVOSIMENDAN	48	1	3843	345.643	3394.64
MCF10A	'3,6-DIHYDROXYFLAVONE'	48	100	3930	345.643	3394.64
MCF10A	alpha-TOCHOPHERYL ACETATE [4mM]	48	5000	3100	345.643	3394.64
MCF10A	'2,5-DIHYDROXY-4-METHOXYCHALCONE'	48	10	3907	345.643	3394.64
MCF10A	d-LIMONENE	48	5000	3733	345.643	3394.64
MCF10A	ADAPALENE	48	1000	3903	345.643	3394.64
MCF10A	DOCONEXENT	48	10	3796	345.643	3394.64
MCF10A	PARAXANTHINE	48	1000	3848	345.643	3394.64
MCF10A	SELAMECTIN	48	5000	3657	345.643	3394.64
MCF10A	THEAFLAVIN	48	10	3629	345.643	3394.64
MCF10A	SELAMECTIN	48	1	3976	345.643	3394.64
MCF10A	THEAFLAVIN	48	1000	3480	345.643	3394.64
MCF10A	FUMARPROTOCETRARIC ACID	48	1000	3708	345.643	3394.64
MCF10A	CINOCTRAMIDE	48	1	3646	345.643	3394.64
MCF10A	INOSINE	48	10	3893	345.643	3394.64
MCF10A	VIOLASTYRENE	48	1	3910	345.643	3394.64
MCF10A	MEROPENEM	48	10	3763	345.643	3394.64
MCF10A	d-LIMONENE	48	100	3685	345.643	3394.64
MCF10A	CAPECITABINE	48	1000	3673	345.643	3394.64
MCF10A	FUMARPROTOCETRARIC ACID	48	1	3650	345.643	3394.64
MCF10A	ADELMIDROL	48	1	3906	345.643	3394.64
MCF10A	CAPECITABINE	48	10	3571	345.643	3394.64
MCF10A	ANDIROBIN	48	1000	3664	345.643	3394.64
MCF10A	ANABASINE HYDROCHLORIDE	48	100	3706	345.643	3394.64
MCF10A	NARINGENIN	48	100	3743	345.643	3394.64
MCF10A	DIFUCOL HEXAMETHYL ETHER	48	5000	3777	345.643	3394.64
MCF10A	BUPIVACAINE HYDROCHLORIDE	48	1	3377	345.643	3394.64
MCF10A	NARINGENIN	48	1000	3405	345.643	3394.64
MCF10A	IZALPININ	48	1000	3841	345.643	3394.64
MCF10A	'2,5-DIHYDROXY-4-METHOXYCHALCONE'	48	1	3822	345.643	3394.64
MCF10A	7-DESHYDROXYPYROGALLIN-4-CARBOXYLIC ACID	48	100	3547	345.643	3394.64
MCF10A	LINEZOLID	48	1000	3934	345.643	3394.64
MCF10A	STROPHANTHIDIN	48	1000	635	345.643	3394.64
MCF10A	PALIPERIDONE	48	5000	3010	345.643	3394.64
MCF10A	DUARTIN (-)	48	5000	3316	345.643	3394.64
MCF10A	COTARNINE CHLORIDE	48	10	4261	345.643	3394.64
MCF10A	'3,6-DIMETHOXYFLAVONE'	48	5000	2965	345.643	3394.64
MCF10A	CINOCTRAMIDE	48	10	3480	345.643	3394.64
MCF10A	LOFEXIDINE HYDROCHLORIDE	48	5000	3740	345.643	3394.64
MCF10A	GEDUNIN	48	10	3550	345.643	3394.64
MCF10A	CHOLEST-5-EN-3-ONE	48	1000	3565	345.643	3394.64
MCF10A	BENZOCLIDINE	48	1000	3591	345.643	3394.64
MCF10A	INOSINE	48	1000	3725	345.643	3394.64
MCF10A	BENZOCLIDINE	48	100	3505	345.643	3394.64
MCF10A	CULMORIN	48	1	3534	345.643	3394.64
MCF10A	LOMEFLOXACIN	48	1	3639	345.643	3394.64
MCF10A	HYDROQUINIDINE	48	10	3764	345.643	3394.64
MCF10A	CALCEIN	48	5000	3839	345.643	3394.64
MCF10A	GEDUNIN	48	1	3288	345.643	3394.64
MCF10A	BENZOCLIDINE	48	5000	3410	345.643	3394.64
MCF10A	alpha-TOCHOPHERYL ACETATE [4mM]	48	100	3301	345.643	3394.64
MCF10A	NITROFURAZONE	48	5000	3850	345.643	3394.64
MCF10A	IZALPININ	48	100	3753	345.643	3394.64
MCF10A	VIOLASTYRENE	48	100	4305	345.643	3394.64
MCF10A	BUPIVACAINE HYDROCHLORIDE	48	1000	3509	345.643	3394.64
MCF10A	NITROFURAZONE	48	100	3050	345.643	3394.64
MCF10A	INOSINE	48	100	4011	345.643	3394.64
MCF10A	'2,5-DIHYDROXY-4-METHOXYCHALCONE'	48	5000	3820	345.643	3394.64
MCF10A	ADELMIDROL	48	10	3900	345.643	3394.64
MCF10A	FLECAINIDE ACETATE	48	5000	3721	345.643	3394.64
MCF10A	FURALTADONE	48	1000	3916	345.643	3394.64
MCF10A	ANDIROBIN	48	1	3390	345.643	3394.64
MCF10A	CULMORIN	48	5000	3534	345.643	3394.64
MCF10A	NARINGENIN	48	1	3898	345.643	3394.64
MCF10A	DIFUCOL HEXAMETHYL ETHER	48	100	3365	345.643	3394.64
MCF10A	DOCONEXENT	48	1000	3528	345.643	3394.64
MCF10A	PALIPERIDONE	48	1	3810	345.643	3394.64
MCF10A	LINEZOLID	48	5000	3662	345.643	3394.64
MCF10A	2-ACETYLPYRROLE	48	1000	3557	345.643	3394.64
MCF10A	'3,6-DIMETHOXYFLAVONE'	48	10	3558	345.643	3394.64
MCF10A	ADAPALENE	48	5000	3668	345.643	3394.64
MCF10A	GEDUNIN	48	1000	3791	345.643	3394.64
MCF10A	IZALPININ	48	10	3702	345.643	3394.64
MCF10A	FLECAINIDE ACETATE	48	100	3244	345.643	3394.64
MCF10A	LINEZOLID	48	100	3628	345.643	3394.64
MCF10A	PARAXANTHINE	48	1	3764	345.643	3394.64
MCF10A	BUPIVACAINE HYDROCHLORIDE	48	10	3847	345.643	3394.64
MCF10A	BRAZILIN	48	10	3540	345.643	3394.64
MCF10A	LINEZOLID	48	1	3956	345.643	3394.64
MCF10A	METOPROLOL TARTRATE	48	1	3924	345.643	3394.64
MCF10A	'3,6-DIHYDROXYFLAVONE'	48	5000	3976	345.643	3394.64
MCF10A	LOMEFLOXACIN	48	1000	3434	345.643	3394.64
MCF10A	ADELMIDROL	48	5000	3275	345.643	3394.64
MCF10A	FLECAINIDE ACETATE	48	1000	3672	345.643	3394.64
MCF10A	CAPECITABINE	48	1	3552	345.643	3394.64
MCF10A	NITROFURAZONE	48	1000	3738	345.643	3394.64
MCF10A	NITROFURAZONE	48	10	3523	345.643	3394.64
MCF10A	LOFEXIDINE HYDROCHLORIDE	48	1000	3601	345.643	3394.64
MCF10A	BENZOCLIDINE	48	1	3611	345.643	3394.64
MCF10A	FERULIC ACID	48	1000	3935	345.643	3394.64
MCF10A	LINEZOLID	48	10	3771	345.643	3394.64
MCF10A	FERULIC ACID	48	1	3574	345.643	3394.64
MCF10A	LOFEXIDINE HYDROCHLORIDE	48	100	3725	345.643	3394.64
MCF10A	PROCARBAZINE HYDROCHLORIDE	48	100	3717	345.643	3394.64
MCF10A	COTARNINE CHLORIDE	48	1	4261	345.643	3394.64
MCF10A	STROPHANTHIDIN	48	1	3261	345.643	3394.64
MCF10A	FURALTADONE	48	5000	4110	345.643	3394.64
MCF10A	CHOLEST-5-EN-3-ONE	48	10	3578	345.643	3394.64
MCF10A	FLECAINIDE ACETATE	48	10	3366	345.643	3394.64
MCF10A	CULMORIN	48	1000	3823	345.643	3394.64
MCF10A	DOCONEXENT	48	100	3239	345.643	3394.64
MCF10A	2-ACETYLPYRROLE	48	10	3585	345.643	3394.64
MCF10A	7-DESHYDROXYPYROGALLIN-4-CARBOXYLIC ACID	48	1	3644	345.643	3394.64
MCF10A	CINOCTRAMIDE	48	5000	2927	345.643	3394.64
MCF10A	CULMORIN	48	10	4307	345.643	3394.64
MCF10A	CALCEIN	48	1	3848	345.643	3394.64
MCF10A	PARAXANTHINE	48	10	3426	345.643	3394.64
MCF10A	OLSALAZINE SODIUM	48	1	3718	345.643	3394.64
MCF10A	OFLOXACIN	48	1	3597	345.643	3394.64
MCF10A	FUMARPROTOCETRARIC ACID	48	100	3733	345.643	3394.64
MCF10A	7-DESHYDROXYPYROGALLIN-4-CARBOXYLIC ACID	48	10	3428	345.643	3394.64
MCF10A	CHOLEST-5-EN-3-ONE	48	5000	3819	345.643	3394.64
MCF10A	'3,6-DIMETHOXYFLAVONE'	48	1	3221	345.643	3394.64
MCF10A	METOPROLOL TARTRATE	48	100	4080	345.643	3394.64
MCF10A	CHOLEST-5-EN-3-ONE	48	1	3877	345.643	3394.64
MCF10A	CHOLEST-5-EN-3-ONE	48	100	3429	345.643	3394.64
MCF10A	STROPHANTHIDIN	48	5000	332	345.643	3394.64
MCF10A	BRAZILIN	48	1000	3592	345.643	3394.64
MCF10A	DUARTIN (-)	48	1	3668	345.643	3394.64
MCF10A	MEROPENEM	48	1000	3601	345.643	3394.64
MCF10A	alpha-TOCHOPHERYL ACETATE [4mM]	48	1000	3363	345.643	3394.64
MCF10A	HYDROQUINIDINE	48	1000	3956	345.643	3394.64
MCF10A	LOMEFLOXACIN	48	5000	3361	345.643	3394.64
MCF10A	DUARTIN (-)	48	100	3705	345.643	3394.64
MCF10A	BUPIVACAINE HYDROCHLORIDE	48	5000	3358	345.643	3394.64
MCF10A	HYDROQUINIDINE	48	5000	3854	345.643	3394.64
MCF10A	OLSALAZINE SODIUM	48	10	3642	345.643	3394.64
MCF10A	DOCONEXENT	48	5000	2870	345.643	3394.64
MCF10A	d-LIMONENE	48	10	3856	345.643	3394.64
MCF10A	CAPECITABINE	48	100	3675	345.643	3394.64
MCF10A	COTARNINE CHLORIDE	48	5000	3454	345.643	3394.64
MCF10A	2-ACETYLPYRROLE	48	100	3440	345.643	3394.64
MCF10A	DIFUCOL HEXAMETHYL ETHER	48	10	3820	345.643	3394.64
MCF10A	FLECAINIDE ACETATE	48	1	3824	345.643	3394.64
MCF10A	LEVOSIMENDAN	48	1000	4247	345.643	3394.64
MCF10A	'3,6-DIHYDROXYFLAVONE'	48	10	3927	345.643	3394.64
MCF10A	PALIPERIDONE	48	10	3362	345.643	3394.64
MCF10A	LEVOSIMENDAN	48	5000	3930	345.643	3394.64
MCF10A	ANABASINE HYDROCHLORIDE	48	1	3443	345.643	3394.64
MCF10A	STROPHANTHIDIN	48	10	3724	345.643	3394.64
MCF10A	LEVOSIMENDAN	48	100	4252	345.643	3394.64
MCF10A	OLSALAZINE SODIUM	48	100	3599	345.643	3394.64
MCF10A	CAPECITABINE	48	5000	2537	345.643	3394.64
MCF10A	NITROFURAZONE	48	1	3817	345.643	3394.64
MCF10A	GEDUNIN	48	100	3769	345.643	3394.64
MCF10A	FERULIC ACID	48	100	3562	345.643	3394.64
MCF10A	FURALTADONE	48	10	3296	345.643	3394.64
MCF10A	FUMARPROTOCETRARIC ACID	48	5000	4080	345.643	3394.64
MCF10A	METOPROLOL TARTRATE	48	1000	3789	345.643	3394.64
MCF10A	CALCEIN	48	10	3871	345.643	3394.64
MCF10A	d-LIMONENE	48	1	3788	345.643	3394.64
MCF10A	ANABASINE HYDROCHLORIDE	48	1000	3767	345.643	3394.64
MCF10A	DUARTIN (-)	48	10	4212	345.643	3394.64
MCF10A	GEDUNIN	48	5000	2558	345.643	3394.64
MCF10A	LOFEXIDINE HYDROCHLORIDE	48	1	3547	345.643	3394.64
MCF10A	INOSINE	48	5000	3517	345.643	3394.64
MCF10A	DIFUCOL HEXAMETHYL ETHER	48	1	3641	345.643	3394.64
MCF10A	VIOLASTYRENE	48	5000	3963	345.643	3394.64
MCF10A	FERULIC ACID	48	10	3691	345.643	3394.64
MCF10A	LEVOSIMENDAN	48	10	4054	345.643	3394.64
MCF10A	ADAPALENE	48	1	4069	345.643	3394.64
MCF10A	BENZOCLIDINE	48	10	3833	345.643	3394.64
MCF10A	'2,5-DIHYDROXY-4-METHOXYCHALCONE'	48	100	3704	345.643	3394.64
MCF10A	PALIPERIDONE	48	100	3554	345.643	3394.64
MCF10A	OFLOXACIN	48	1000	3996	345.643	3394.64
MCF10A	7-DESHYDROXYPYROGALLIN-4-CARBOXYLIC ACID	48	1000	3465	345.643	3394.64
MCF10A	FERULIC ACID	48	5000	3454	345.643	3394.64
MCF10A	2-ACETYLPYRROLE	48	1	3774	345.643	3394.64
MCF10A	OFLOXACIN	48	5000	3619	345.643	3394.64
MCF10A	THEAFLAVIN	48	100	3224	345.643	3394.64
MCF10A	'3,6-DIHYDROXYFLAVONE'	48	1000	3547	345.643	3394.64
MCF10A	HYDROQUINIDINE	48	100	3964	345.643	3394.64
MCF10A	CINOCTRAMIDE	48	1000	3203	345.643	3394.64
MCF10A	PROCARBAZINE HYDROCHLORIDE	48	5000	4024	345.643	3394.64
MCF10A	DIFUCOL HEXAMETHYL ETHER	48	1000	3512	345.643	3394.64
MCF10A	THEAFLAVIN	48	1	3556	345.643	3394.64
MCF10A	MEROPENEM	48	5000	2696	345.643	3394.64
MCF10A	BRAZILIN	48	100	3927	345.643	3394.64
MCF10A	SELAMECTIN	48	1000	3767	345.643	3394.64
MCF10A	BUPIVACAINE HYDROCHLORIDE	48	100	3456	345.643	3394.64
MCF10A	ANDIROBIN	48	5000	3998	345.643	3394.64
MCF10A	LOMEFLOXACIN	48	10	4099	345.643	3394.64
MCF10A	OLSALAZINE SODIUM	48	1000	3280	345.643	3394.64
MCF10A	IZALPININ	48	1	3424	345.643	3394.64
MCF10A	NARINGENIN	48	10	3409	345.643	3394.64
MCF10A	CALCEIN	48	100	3775	345.643	3394.64
MCF10A	PARAXANTHINE	48	5000	3729	345.643	3394.64
MCF10A	PROCARBAZINE HYDROCHLORIDE	48	10	3442	345.643	3394.64
MCF10A	alpha-TOCHOPHERYL ACETATE [4mM]	48	1	3422	345.643	3394.64
MCF10A	BRAZILIN	48	1	3645	345.643	3394.64
MCF10A	ADELMIDROL	48	1000	3362	345.643	3394.64
MCF10A	FUMARPROTOCETRARIC ACID	48	10	3676	345.643	3394.64
MCF10A	'2,5-DIHYDROXY-4-METHOXYCHALCONE'	48	1000	3897	345.643	3394.64
MCF10A	PROCARBAZINE HYDROCHLORIDE	48	1	3905	345.643	3394.64
MCF10A	LOFEXIDINE HYDROCHLORIDE	48	10	3712	345.643	3394.64
MCF10A	LOMEFLOXACIN	48	100	4512	345.643	3394.64
MCF10A	alpha-TOCHOPHERYL ACETATE [4mM]	48	10	4085	345.643	3394.64
MCF10A	METOPROLOL TARTRATE	48	10	3732	345.643	3394.64
MCF10A	VIOLASTYRENE	48	10	3816	345.643	3394.64
MCF10A	CINOCTRAMIDE	48	100	3719	345.643	3394.64
MCF10A	DOCONEXENT	48	1	3391	345.643	3394.64
MCF10A	MEROPENEM	48	100	4334	345.643	3394.64
MCF10A	COTARNINE CHLORIDE	48	1000	3733	345.643	3394.64
MCF10A	COTARNINE CHLORIDE	48	100	4245	345.643	3394.64
MCF10A	FURALTADONE	48	1	3385	345.643	3394.64
MCF10A	METOPROLOL TARTRATE	48	5000	3552	345.643	3394.64
MCF10A	'3,6-DIMETHOXYFLAVONE'	48	1000	3503	345.643	3394.64
MCF10A	PROCARBAZINE HYDROCHLORIDE	48	1000	3692	345.643	3394.64
MCF10A	MEROPENEM	48	1	3180	345.643	3394.64
MCF10A	OFLOXACIN	48	100	3426	345.643	3394.64
MCF10A	INOSINE	48	1	3505	345.643	3394.64
MCF10A	7-DESHYDROXYPYROGALLIN-4-CARBOXYLIC ACID	48	5000	3221	345.643	3394.64
MCF10A	PARAXANTHINE	48	100	4221	345.643	3394.64
MCF10A	HYDROQUINIDINE	48	1	3775	345.643	3394.64
MCF10A	ADAPALENE	48	100	3373	345.643	3394.64
MCF10A	'3,6-DIHYDROXYFLAVONE'	48	1	4036	345.643	3394.64
MCF10A	NADIDE	48	1	3039	345.643	2997.69
MCF10A	LORNOXICAM	48	1	3478	345.643	2997.69
MCF10A	MICONAZOLE NITRATE	48	1000	3351	345.643	2997.69
MCF10A	GADOTERIDOL	48	5000	3407	345.643	2997.69
MCF10A	'5,7-DIHYDROXY-4-METHYLCOUMARIN'	48	10	3031	345.643	2997.69
MCF10A	TETRAC	48	5000	3523	345.643	2997.69
MCF10A	2-THIOURACIL	48	10	3354	345.643	2997.69
MCF10A	CHOLINE CHLORIDE	48	1000	3383	345.643	2997.69
MCF10A	METACETAMOL	48	1	3308	345.643	2997.69
MCF10A	7-HYDROXY-2-METHOXYISOFLAVONE	48	1000	3490	345.643	2997.69
MCF10A	LORNOXICAM	48	10	3067	345.643	2997.69
MCF10A	ISORESERPINE	48	1	3824	345.643	2997.69
MCF10A	ARISTOLOCHIC ACID	48	5000	2460	345.643	2997.69
MCF10A	LORNOXICAM	48	100	3189	345.643	2997.69
MCF10A	NADIDE	48	5000	1943	345.643	2997.69
MCF10A	ALLOXAN	48	100	3760	345.643	2997.69
MCF10A	FENCLONINE (+/-)	48	10	3383	345.643	2997.69
MCF10A	O-BENZYL-l-SERINE	48	10	3526	345.643	2997.69
MCF10A	MEXICANOLIDE	48	100	4091	345.643	2997.69
MCF10A	2-THIOURACIL	48	1	2933	345.643	2997.69
MCF10A	ESOMEPRAZOLE POTASSIUM	48	1	3337	345.643	2997.69
MCF10A	L-BUTHIONINE SULFOXIMINE	48	100	3095	345.643	2997.69
MCF10A	PENFLURIDOL	48	1	3782	345.643	2997.69
MCF10A	METHYLPREDNISOLONE	48	1000	2881	345.643	2997.69
MCF10A	CHLORINDANOL	48	1000	3082	345.643	2997.69
MCF10A	7-HYDROXY-2-METHOXYISOFLAVONE	48	5000	3182	345.643	2997.69
MCF10A	FISETIN	48	1	3331	345.643	2997.69
MCF10A	TERFENADINE	48	100	3090	345.643	2997.69
MCF10A	'4,6-DIMETHOXYTOLUQUINONE'	48	1	3065	345.643	2997.69
MCF10A	MESTRANOL	48	1000	2928	345.643	2997.69
MCF10A	CHLORINDANOL	48	1	3409	345.643	2997.69
MCF10A	ARTENIMOL	48	1000	2903	345.643	2997.69
MCF10A	NADIDE	48	100	2807	345.643	2997.69
MCF10A	NIMODIPINE	48	10	3283	345.643	2997.69
MCF10A	ABACAVIR SULFATE	48	100	3423	345.643	2997.69
MCF10A	ENALAPRILAT	48	1	3153	345.643	2997.69
MCF10A	PICONOL	48	100	3460	345.643	2997.69
MCF10A	MESTRANOL	48	1	2877	345.643	2997.69
MCF10A	ENALAPRILAT	48	5000	3999	345.643	2997.69
MCF10A	GADOTERIDOL	48	10	3245	345.643	2997.69
MCF10A	LECANORIC ACID	48	100	3379	345.643	2997.69
MCF10A	'1-HYDROXY-3,6,7-TRIMETHOXY-2,8-DIPRENYLXANTHONE'	48	5000	2139	345.643	2997.69
MCF10A	2-THIOURACIL	48	1000	3663	345.643	2997.69
MCF10A	PICONOL	48	1000	2721	345.643	2997.69
MCF10A	ANISODAMINE HYDROBROMIDE	48	100	3290	345.643	2997.69
MCF10A	O-BENZYL-l-SERINE	48	5000	3574	345.643	2997.69
MCF10A	ENALAPRILAT	48	10	3432	345.643	2997.69
MCF10A	METHYLPREDNISOLONE	48	100	3184	345.643	2997.69
MCF10A	FISETIN	48	5000	2810	345.643	2997.69
MCF10A	MEPHENYTOIN	48	1	3199	345.643	2997.69
MCF10A	NIMODIPINE	48	1	3393	345.643	2997.69
MCF10A	MEPHENYTOIN	48	10	3161	345.643	2997.69
MCF10A	PICONOL	48	1	3202	345.643	2997.69
MCF10A	LECANORIC ACID	48	10	3103	345.643	2997.69
MCF10A	MICONAZOLE NITRATE	48	100	3515	345.643	2997.69
MCF10A	ARISTOLOCHIC ACID	48	100	2930	345.643	2997.69
MCF10A	MEXICANOLIDE	48	5000	3314	345.643	2997.69
MCF10A	2-THIOURACIL	48	5000	3368	345.643	2997.69
MCF10A	TETRAC	48	10	3383	345.643	2997.69
MCF10A	CHOLINE CHLORIDE	48	1	3582	345.643	2997.69
MCF10A	METHACHOLINE CHLORIDE	48	1000	3489	345.643	2997.69
MCF10A	ACACETIN	48	5000	3493	345.643	2997.69
MCF10A	'4,6-DIMETHOXYTOLUQUINONE'	48	1000	3463	345.643	2997.69
MCF10A	AGMATINE SULFATE	48	10	3183	345.643	2997.69
MCF10A	TERFENADINE	48	5000	3128	345.643	2997.69
MCF10A	8-CYCLOPENTYLTHEOPHYLLINE	48	5000	2632	345.643	2997.69
MCF10A	LORATADINE	48	100	3917	345.643	2997.69
MCF10A	O-BENZYL-l-SERINE	48	1	3979	345.643	2997.69
MCF10A	'5,7-DIHYDROXY-4-METHYLCOUMARIN'	48	5000	3163	345.643	2997.69
MCF10A	O-BENZYL-l-SERINE	48	1000	3152	345.643	2997.69
MCF10A	METHACHOLINE CHLORIDE	48	1	3295	345.643	2997.69
MCF10A	FISETIN	48	100	3716	345.643	2997.69
MCF10A	8-CYCLOPENTYLTHEOPHYLLINE	48	1000	2944	345.643	2997.69
MCF10A	HECOGENIN	48	1	3355	345.643	2997.69
MCF10A	8-CYCLOPENTYLTHEOPHYLLINE	48	100	3253	345.643	2997.69
MCF10A	FENCLONINE (+/-)	48	1000	3260	345.643	2997.69
MCF10A	METHACHOLINE CHLORIDE	48	100	3439	345.643	2997.69
MCF10A	PICONOL	48	10	3302	345.643	2997.69
MCF10A	ESTRONE ACETATE	48	5000	3259	345.643	2997.69
MCF10A	HECOGENIN	48	100	3266	345.643	2997.69
MCF10A	8-CYCLOPENTYLTHEOPHYLLINE	48	10	3651	345.643	2997.69
MCF10A	'5,7-DIHYDROXY-4-METHYLCOUMARIN'	48	1	3421	345.643	2997.69
MCF10A	'4,6-DIMETHOXYTOLUQUINONE'	48	5000	2186	345.643	2997.69
MCF10A	ISORESERPINE	48	100	3213	345.643	2997.69
MCF10A	3beta-ACETOXY-23-BROMO-ISOALLOSPIROST-9 (11)-ENE-12-ONE	48	10	3254	345.643	2997.69
MCF10A	ESTRONE ACETATE	48	100	3483	345.643	2997.69
MCF10A	VINDOLINE	48	10	3010	345.643	2997.69
MCF10A	ESTRONE ACETATE	48	1000	3255	345.643	2997.69
MCF10A	MEXICANOLIDE	48	10	3261	345.643	2997.69
MCF10A	FISETIN	48	1000	3362	345.643	2997.69
MCF10A	MEXICANOLIDE	48	1	3911	345.643	2997.69
MCF10A	PICONOL	48	5000	2915	345.643	2997.69
MCF10A	8-CYCLOPENTYLTHEOPHYLLINE	48	1	3585	345.643	2997.69
MCF10A	MEPHENYTOIN	48	5000	3412	345.643	2997.69
MCF10A	ACACETIN	48	1	3755	345.643	2997.69
MCF10A	5-AMINOPENTANOIC ACID HYDROCHLORIDE	48	10	2776	345.643	2997.69
MCF10A	AVERMECTIN A1a	48	10	3772	345.643	2997.69
MCF10A	METACETAMOL	48	5000	3184	345.643	2997.69
MCF10A	LORNOXICAM	48	1000	3526	345.643	2997.69
MCF10A	MICONAZOLE NITRATE	48	5000	3105	345.643	2997.69
MCF10A	LECANORIC ACID	48	1	3172	345.643	2997.69
MCF10A	HOMOSALATE	48	1	3177	345.643	2997.69
MCF10A	AGMATINE SULFATE	48	1000	3520	345.643	2997.69
MCF10A	L-BUTHIONINE SULFOXIMINE	48	1	3378	345.643	2997.69
MCF10A	ISORESERPINE	48	10	3323	345.643	2997.69
MCF10A	ESOMEPRAZOLE POTASSIUM	48	1000	3043	345.643	2997.69
MCF10A	L-BUTHIONINE SULFOXIMINE	48	1000	3643	345.643	2997.69
MCF10A	ENALAPRILAT	48	1000	3163	345.643	2997.69
MCF10A	5-AMINOPENTANOIC ACID HYDROCHLORIDE	48	1000	3155	345.643	2997.69
MCF10A	METACETAMOL	48	100	3561	345.643	2997.69
MCF10A	ESOMEPRAZOLE POTASSIUM	48	5000	3414	345.643	2997.69
MCF10A	ESOMEPRAZOLE POTASSIUM	48	10	3430	345.643	2997.69
MCF10A	'1-HYDROXY-3,6,7-TRIMETHOXY-2,8-DIPRENYLXANTHONE'	48	1000	3374	345.643	2997.69
MCF10A	LORATADINE	48	1000	3303	345.643	2997.69
MCF10A	ALLYLTHIOUREA	48	10	3420	345.643	2997.69
MCF10A	NIMODIPINE	48	100	3287	345.643	2997.69
MCF10A	ABACAVIR SULFATE	48	1	3343	345.643	2997.69
MCF10A	AGMATINE SULFATE	48	1	3165	345.643	2997.69
MCF10A	L-BUTHIONINE SULFOXIMINE	48	10	3094	345.643	2997.69
MCF10A	ISORESERPINE	48	1000	3627	345.643	2997.69
MCF10A	TETRAC	48	100	3419	345.643	2997.69
MCF10A	MICONAZOLE NITRATE	48	10	3675	345.643	2997.69
MCF10A	ACACETIN	48	100	2938	345.643	2997.69
MCF10A	ARTENIMOL	48	10	3417	345.643	2997.69
MCF10A	METHYLPREDNISOLONE	48	5000	2978	345.643	2997.69
MCF10A	MEXICANOLIDE	48	1000	3846	345.643	2997.69
MCF10A	HOMOSALATE	48	5000	3208	345.643	2997.69
MCF10A	PENFLURIDOL	48	100	3375	345.643	2997.69
MCF10A	METHACHOLINE CHLORIDE	48	5000	3137	345.643	2997.69
MCF10A	FISETIN	48	10	3614	345.643	2997.69
MCF10A	PENFLURIDOL	48	10	3201	345.643	2997.69
MCF10A	AVERMECTIN A1a	48	5000	3100	345.643	2997.69
MCF10A	ISOPILOCARPINE NITRATE	48	5000	2539	345.643	2997.69
MCF10A	HOMOSALATE	48	1000	3340	345.643	2997.69
MCF10A	ACACETIN	48	10	4074	345.643	2997.69
MCF10A	AGMATINE SULFATE	48	100	3424	345.643	2997.69
MCF10A	2-THIOURACIL	48	100	3503	345.643	2997.69
MCF10A	5-AMINOPENTANOIC ACID HYDROCHLORIDE	48	5000	2670	345.643	2997.69
MCF10A	ISOPILOCARPINE NITRATE	48	1000	3241	345.643	2997.69
MCF10A	LORATADINE	48	1	3267	345.643	2997.69
MCF10A	CHLORINDANOL	48	100	3396	345.643	2997.69
MCF10A	HECOGENIN	48	10	3604	345.643	2997.69
MCF10A	LECANORIC ACID	48	1000	3167	345.643	2997.69
MCF10A	ALLOXAN	48	10	3144	345.643	2997.69
MCF10A	MESTRANOL	48	100	3176	345.643	2997.69
MCF10A	TETRAC	48	1	3312	345.643	2997.69
MCF10A	ALLYLTHIOUREA	48	1000	3262	345.643	2997.69
MCF10A	ALLYLTHIOUREA	48	100	2741	345.643	2997.69
MCF10A	ESTRONE ACETATE	48	1	3259	345.643	2997.69
MCF10A	ANISODAMINE HYDROBROMIDE	48	1	3011	345.643	2997.69
MCF10A	HOMOSALATE	48	10	3418	345.643	2997.69
MCF10A	ARTENIMOL	48	100	3253	345.643	2997.69
MCF10A	ISOPILOCARPINE NITRATE	48	1	3357	345.643	2997.69
MCF10A	L-BUTHIONINE SULFOXIMINE	48	5000	3375	345.643	2997.69
MCF10A	'5,7-DIHYDROXY-4-METHYLCOUMARIN'	48	100	3504	345.643	2997.69
MCF10A	ENALAPRILAT	48	100	3230	345.643	2997.69
MCF10A	VINDOLINE	48	1000	3015	345.643	2997.69
MCF10A	ANISODAMINE HYDROBROMIDE	48	5000	3377	345.643	2997.69
MCF10A	ISORESERPINE	48	5000	3001	345.643	2997.69
MCF10A	3beta-ACETOXY-23-BROMO-ISOALLOSPIROST-9 (11)-ENE-12-ONE	48	100	3101	345.643	2997.69
MCF10A	LORNOXICAM	48	5000	3574	345.643	2997.69
MCF10A	ALLYLTHIOUREA	48	1	3568	345.643	2997.69
MCF10A	'1-HYDROXY-3,6,7-TRIMETHOXY-2,8-DIPRENYLXANTHONE'	48	1	3346	345.643	2997.69
MCF10A	AGMATINE SULFATE	48	5000	3253	345.643	2997.69
MCF10A	AVERMECTIN A1a	48	1	3549	345.643	2997.69
MCF10A	MICONAZOLE NITRATE	48	1	3493	345.643	2997.69
MCF10A	MEPHENYTOIN	48	100	3599	345.643	2997.69
MCF10A	ACACETIN	48	1000	3422	345.643	2997.69
MCF10A	HOMOSALATE	48	100	3431	345.643	2997.69
MCF10A	O-BENZYL-l-SERINE	48	100	4247	345.643	2997.69
MCF10A	ISOPILOCARPINE NITRATE	48	100	3575	345.643	2997.69
MCF10A	7-HYDROXY-2-METHOXYISOFLAVONE	48	100	3142	345.643	2997.69
MCF10A	NIMODIPINE	48	5000	3249	345.643	2997.69
MCF10A	ARTENIMOL	48	1	2946	345.643	2997.69
MCF10A	CHOLINE CHLORIDE	48	100	3598	345.643	2997.69
MCF10A	CHOLINE CHLORIDE	48	10	2913	345.643	2997.69
MCF10A	ARISTOLOCHIC ACID	48	1	2991	345.643	2997.69
MCF10A	TERFENADINE	48	10	3349	345.643	2997.69
MCF10A	ALLOXAN	48	1000	3674	345.643	2997.69
MCF10A	TERFENADINE	48	1	3221	345.643	2997.69
MCF10A	PENFLURIDOL	48	1000	3162	345.643	2997.69
MCF10A	NADIDE	48	10	3702	345.643	2997.69
MCF10A	'1-HYDROXY-3,6,7-TRIMETHOXY-2,8-DIPRENYLXANTHONE'	48	100	2790	345.643	2997.69
MCF10A	FENCLONINE (+/-)	48	1	3468	345.643	2997.69
MCF10A	'4,6-DIMETHOXYTOLUQUINONE'	48	10	3444	345.643	2997.69
MCF10A	MESTRANOL	48	10	3351	345.643	2997.69
MCF10A	MEPHENYTOIN	48	1000	3006	345.643	2997.69
MCF10A	3beta-ACETOXY-23-BROMO-ISOALLOSPIROST-9 (11)-ENE-12-ONE	48	1	3298	345.643	2997.69
MCF10A	HECOGENIN	48	1000	3323	345.643	2997.69
MCF10A	METHYLPREDNISOLONE	48	1	3401	345.643	2997.69
MCF10A	'1-HYDROXY-3,6,7-TRIMETHOXY-2,8-DIPRENYLXANTHONE'	48	10	3278	345.643	2997.69
MCF10A	3beta-ACETOXY-23-BROMO-ISOALLOSPIROST-9 (11)-ENE-12-ONE	48	1000	3610	345.643	2997.69
MCF10A	CHLORINDANOL	48	5000	3449	345.643	2997.69
MCF10A	ANISODAMINE HYDROBROMIDE	48	10	3261	345.643	2997.69
MCF10A	5-AMINOPENTANOIC ACID HYDROCHLORIDE	48	1	3257	345.643	2997.69
MCF10A	METHYLPREDNISOLONE	48	10	3075	345.643	2997.69
MCF10A	ABACAVIR SULFATE	48	10	3405	345.643	2997.69
MCF10A	'4,6-DIMETHOXYTOLUQUINONE'	48	100	2890	345.643	2997.69
MCF10A	FENCLONINE (+/-)	48	100	3313	345.643	2997.69
MCF10A	METACETAMOL	48	10	3388	345.643	2997.69
MCF10A	ESTRONE ACETATE	48	10	3718	345.643	2997.69
MCF10A	ISOPILOCARPINE NITRATE	48	10	3652	345.643	2997.69
MCF10A	ALLOXAN	48	1	3908	345.643	2997.69
MCF10A	7-HYDROXY-2-METHOXYISOFLAVONE	48	10	3406	345.643	2997.69
MCF10A	CHLORINDANOL	48	10	3538	345.643	2997.69
MCF10A	'5,7-DIHYDROXY-4-METHYLCOUMARIN'	48	1000	3311	345.643	2997.69
MCF10A	FENCLONINE (+/-)	48	5000	3526	345.643	2997.69
MCF10A	ANISODAMINE HYDROBROMIDE	48	1000	3414	345.643	2997.69
MCF10A	ESOMEPRAZOLE POTASSIUM	48	100	3516	345.643	2997.69
MCF10A	ALLYLTHIOUREA	48	5000	2819	345.643	2997.69
MCF10A	ALLOXAN	48	5000	3209	345.643	2997.69
MCF10A	METHACHOLINE CHLORIDE	48	10	3244	345.643	2997.69
MCF10A	PENFLURIDOL	48	5000	2529	345.643	2997.69
MCF10A	NADIDE	48	1000	3085	345.643	2997.69
MCF10A	GADOTERIDOL	48	100	3104	345.643	2997.69
MCF10A	AVERMECTIN A1a	48	100	3967	345.643	2997.69
MCF10A	GADOTERIDOL	48	1000	3327	345.643	2997.69
MCF10A	LORATADINE	48	10	3857	345.643	2997.69
MCF10A	CHOLINE CHLORIDE	48	5000	3716	345.643	2997.69
MCF10A	TERFENADINE	48	1000	3585	345.643	2997.69
MCF10A	3beta-ACETOXY-23-BROMO-ISOALLOSPIROST-9 (11)-ENE-12-ONE	48	5000	3002	345.643	2997.69
MCF10A	VINDOLINE	48	5000	3048	345.643	2997.69
MCF10A	ARISTOLOCHIC ACID	48	1000	3012	345.643	2997.69
MCF10A	ARTENIMOL	48	5000	1079	345.643	2997.69
MCF10A	TETRAC	48	1000	3278	345.643	2997.69
MCF10A	ABACAVIR SULFATE	48	1000	3749	345.643	2997.69
MCF10A	AVERMECTIN A1a	48	1000	3411	345.643	2997.69
MCF10A	VINDOLINE	48	100	3035	345.643	2997.69
MCF10A	ARISTOLOCHIC ACID	48	10	3058	345.643	2997.69
MCF10A	LORATADINE	48	5000	3531	345.643	2997.69
MCF10A	NIMODIPINE	48	1000	3041	345.643	2997.69
MCF10A	LECANORIC ACID	48	5000	3392	345.643	2997.69
MCF10A	5-AMINOPENTANOIC ACID HYDROCHLORIDE	48	100	3177	345.643	2997.69
MCF10A	7-HYDROXY-2-METHOXYISOFLAVONE	48	1	3457	345.643	2997.69
MCF10A	MESTRANOL	48	5000	2685	345.643	2997.69
MCF10A	METACETAMOL	48	1000	3075	345.643	2997.69
MCF10A	GADOTERIDOL	48	1	3048	345.643	2997.69
MCF10A	ABACAVIR SULFATE	48	5000	3347	345.643	2997.69
MCF10A	HECOGENIN	48	5000	2892	345.643	2997.69
MCF10A	VINDOLINE	48	1	3161	345.643	2997.69
MCF10A	VORICONAZOLE	48	10	3445	345.643	3200.35
MCF10A	CRESOPIRINE	48	10	3736	345.643	3200.35
MCF10A	DIHYDROROTENONE	48	10	3779	345.643	3200.35
MCF10A	SERATRODAST	48	5000	3341	345.643	3200.35
MCF10A	SERATRODAST	48	10	3249	345.643	3200.35
MCF10A	AMPROLIUM	48	1000	3850	345.643	3200.35
MCF10A	HYDROXYPROGESTERONE	48	1000	3380	345.643	3200.35
MCF10A	SERATRODAST	48	1000	3625	345.643	3200.35
MCF10A	VORICONAZOLE	48	100	3469	345.643	3200.35
MCF10A	TIRATRICOL	48	10	3382	345.643	3200.35
MCF10A	CRESOPIRINE	48	5000	3688	345.643	3200.35
MCF10A	'2,2-AZO-bis-2-AMINOPROPANE'	48	5000	3603	345.643	3200.35
MCF10A	ROXATIDINE ACETATE HYDROCHLORIDE	48	1	3335	345.643	3200.35
MCF10A	AMLEXANOX	48	1	3779	345.643	3200.35
MCF10A	'2,2-AZO-bis-2-AMINOPROPANE'	48	100	3245	345.643	3200.35
MCF10A	AMPROLIUM	48	10	3657	345.643	3200.35
MCF10A	LOMUSTINE	48	1	3110	345.643	3200.35
MCF10A	DIHYDROROTENONE	48	100	3245	345.643	3200.35
MCF10A	HARMOL	48	5000	3336	345.643	3200.35
MCF10A	OXINIACIC ACID	48	100	3685	345.643	3200.35
MCF10A	NEFAZODONE HYDROCHLORIDE	48	1000	3447	345.643	3200.35
MCF10A	HYDROXYPROGESTERONE	48	100	3575	345.643	3200.35
MCF10A	CEPHARANTHINE	48	1	3279	345.643	3200.35
MCF10A	HARMOL	48	100	3159	345.643	3200.35
MCF10A	NEFAZODONE HYDROCHLORIDE	48	1	3805	345.643	3200.35
MCF10A	QUINESTROL	48	1000	3122	345.643	3200.35
MCF10A	TIRATRICOL	48	100	3407	345.643	3200.35
MCF10A	HARMOL	48	1000	3447	345.643	3200.35
MCF10A	LOMUSTINE	48	5000	3102	345.643	3200.35
MCF10A	TIRATRICOL	48	5000	3168	345.643	3200.35
MCF10A	DIHYDROROTENONE	48	1000	3069	345.643	3200.35
MCF10A	CRESOPIRINE	48	1000	3273	345.643	3200.35
MCF10A	HYDROXYPROGESTERONE	48	5000	2479	345.643	3200.35
MCF10A	NEFAZODONE HYDROCHLORIDE	48	5000	3248	345.643	3200.35
MCF10A	DIHYDROROTENONE	48	5000	3077	345.643	3200.35
MCF10A	OXINIACIC ACID	48	5000	2357	345.643	3200.35
MCF10A	LOMUSTINE	48	1000	2852	345.643	3200.35
MCF10A	HYDROXYPROGESTERONE	48	1	3272	345.643	3200.35
MCF10A	NEFAZODONE HYDROCHLORIDE	48	100	3439	345.643	3200.35
MCF10A	AMPROLIUM	48	5000	3430	345.643	3200.35
MCF10A	DIHYDROROTENONE	48	1	3350	345.643	3200.35
MCF10A	'2,2-AZO-bis-2-AMINOPROPANE'	48	10	3954	345.643	3200.35
MCF10A	CEPHARANTHINE	48	1000	3279	345.643	3200.35
MCF10A	CEPHARANTHINE	48	10	3609	345.643	3200.35
MCF10A	QUINESTROL	48	5000	2841	345.643	3200.35
MCF10A	OXINIACIC ACID	48	10	3729	345.643	3200.35
MCF10A	ROXATIDINE ACETATE HYDROCHLORIDE	48	5000	3345	345.643	3200.35
MCF10A	VORICONAZOLE	48	5000	3743	345.643	3200.35
MCF10A	AMLEXANOX	48	10	3776	345.643	3200.35
MCF10A	HYDROXYPROGESTERONE	48	10	3665	345.643	3200.35
MCF10A	VORICONAZOLE	48	1000	3285	345.643	3200.35
MCF10A	OXINIACIC ACID	48	1	3292	345.643	3200.35
MCF10A	VORICONAZOLE	48	1	3350	345.643	3200.35
MCF10A	TIRATRICOL	48	1	3245	345.643	3200.35
MCF10A	HARMOL	48	10	3808	345.643	3200.35
MCF10A	AMLEXANOX	48	5000	3435	345.643	3200.35
MCF10A	QUINESTROL	48	10	3235	345.643	3200.35
MCF10A	TIRATRICOL	48	1000	3621	345.643	3200.35
MCF10A	NEFAZODONE HYDROCHLORIDE	48	10	3436	345.643	3200.35
MCF10A	CRESOPIRINE	48	100	3228	345.643	3200.35
MCF10A	AMPROLIUM	48	100	3641	345.643	3200.35
MCF10A	AMPROLIUM	48	1	3808	345.643	3200.35
MCF10A	ROXATIDINE ACETATE HYDROCHLORIDE	48	100	3200	345.643	3200.35
MCF10A	'2,2-AZO-bis-2-AMINOPROPANE'	48	1000	3412	345.643	3200.35
MCF10A	'2,2-AZO-bis-2-AMINOPROPANE'	48	1	3636	345.643	3200.35
MCF10A	CRESOPIRINE	48	1	3745	345.643	3200.35
MCF10A	QUINESTROL	48	100	3777	345.643	3200.35
MCF10A	ROXATIDINE ACETATE HYDROCHLORIDE	48	10	3235	345.643	3200.35
MCF10A	ROXATIDINE ACETATE HYDROCHLORIDE	48	1000	3072	345.643	3200.35
MCF10A	SERATRODAST	48	100	3963	345.643	3200.35
MCF10A	AMLEXANOX	48	100	3604	345.643	3200.35
MCF10A	CEPHARANTHINE	48	5000	2848	345.643	3200.35
MCF10A	LOMUSTINE	48	10	3157	345.643	3200.35
MCF10A	OXINIACIC ACID	48	1000	3283	345.643	3200.35
MCF10A	QUINESTROL	48	1	3638	345.643	3200.35
MCF10A	LOMUSTINE	48	100	3276	345.643	3200.35
MCF10A	SERATRODAST	48	1	3502	345.643	3200.35
MCF10A	CEPHARANTHINE	48	100	3392	345.643	3200.35
MCF10A	HARMOL	48	1	3492	345.643	3200.35
MCF10A	AMLEXANOX	48	1000	3738	345.643	3200.35
MCF10A	ISOKOBUSONE	48	1000	3386	345.643	3225.58
MCF10A	ROCCELLIC ACID	48	1	3313	345.643	3225.58
MCF10A	CAPSANTHIN	48	5000	3410	345.643	3225.58
MCF10A	BIPERIDEN	48	1000	3462	345.643	3225.58
MCF10A	DEOXYKHIVORIN	48	1	2938	345.643	3225.58
MCF10A	ROCCELLIC ACID	48	10	3471	345.643	3225.58
MCF10A	DISOPYRAMIDE PHOSPHATE	48	1000	2989	345.643	3225.58
MCF10A	ROCCELLIC ACID	48	5000	3877	345.643	3225.58
MCF10A	ACECAINIDE HYDROCHLORIDE	48	1	2862	345.643	3225.58
MCF10A	CARAPIN-8(9)-ENE	48	100	3670	345.643	3225.58
MCF10A	MANGIFERIN	48	100	3326	345.643	3225.58
MCF10A	THEANINE POTASSIUM	48	1	3530	345.643	3225.58
MCF10A	RHODOCLADONIC ACID	48	1000	3782	345.643	3225.58
MCF10A	PURPURIN	48	1000	3712	345.643	3225.58
MCF10A	'DEOXYSAPPANONE B 7,4-DIMETHYL ETHER'	48	1	3251	345.643	3225.58
MCF10A	SODIUM MONOFLUOROPHOSPHATE	48	100	3718	345.643	3225.58
MCF10A	LIOTHYRONINE (L- isomer) SODIUM	48	1000	3578	345.643	3225.58
MCF10A	IFOSFAMIDE	48	100	3472	345.643	3225.58
MCF10A	CITRULLINE	48	100	3418	345.643	3225.58
MCF10A	ORSELLINIC ACID	48	5000	3718	345.643	3225.58
MCF10A	THEANINE POTASSIUM	48	1000	3262	345.643	3225.58
MCF10A	SOLASODINE	48	10	3187	345.643	3225.58
MCF10A	IFOSFAMIDE	48	10	3456	345.643	3225.58
MCF10A	DIMETHYL GAMBOGINATE	48	1000	3556	345.643	3225.58
MCF10A	HYMECHROME	48	1000	3402	345.643	3225.58
MCF10A	BIOCHANIN A DIACETATE	48	10	3287	345.643	3225.58
MCF10A	IVERMECTIN	48	100	3062	345.643	3225.58
MCF10A	MANGIFERIN	48	1000	3299	345.643	3225.58
MCF10A	TAPENTADOL HYDROCHLORIDE	48	5000	3047	345.643	3225.58
MCF10A	TAPENTADOL HYDROCHLORIDE	48	1	3281	345.643	3225.58
MCF10A	'12-HYDROXY-4,4-BISNOR-4,8,11,13-PODOCARPATETRAEN-3-ONE'	48	100	3234	345.643	3225.58
MCF10A	DISOPYRAMIDE PHOSPHATE	48	1	3605	345.643	3225.58
MCF10A	DISOPYRAMIDE PHOSPHATE	48	100	3121	345.643	3225.58
MCF10A	SOLASODINE	48	1	3580	345.643	3225.58
MCF10A	SULISOBENZONE	48	1	3301	345.643	3225.58
MCF10A	ACRIFLAVINIUM HYDROCHLORIDE	48	1000	2017	345.643	3225.58
MCF10A	HYMECHROME	48	10	3429	345.643	3225.58
MCF10A	BIOCHANIN A DIACETATE	48	1000	3249	345.643	3225.58
MCF10A	TAPENTADOL HYDROCHLORIDE	48	100	3436	345.643	3225.58
MCF10A	HYMECHROME	48	100	3678	345.643	3225.58
MCF10A	CARAPIN-8(9)-ENE	48	10	3121	345.643	3225.58
MCF10A	SOLASODINE	48	5000	3174	345.643	3225.58
MCF10A	ACECAINIDE HYDROCHLORIDE	48	100	3298	345.643	3225.58
MCF10A	CAPTAMINE	48	1	3536	345.643	3225.58
MCF10A	ISOKOBUSONE	48	1	3557	345.643	3225.58
MCF10A	PHLORETIN	48	100	3759	345.643	3225.58
MCF10A	PURPURIN	48	100	3345	345.643	3225.58
MCF10A	DEOXYKHIVORIN	48	1000	3315	345.643	3225.58
MCF10A	'ISOTECTORIGENIN, 7-METHYL ETHER'	48	1000	3424	345.643	3225.58
MCF10A	ACECAINIDE HYDROCHLORIDE	48	10	3338	345.643	3225.58
MCF10A	BAICALEIN	48	1	3266	345.643	3225.58
MCF10A	ROCCELLIC ACID	48	100	3274	345.643	3225.58
MCF10A	BIPERIDEN	48	10	3946	345.643	3225.58
MCF10A	CITRULLINE	48	10	3626	345.643	3225.58
MCF10A	DIHYDROGAMBOGIC ACID	48	5000	3788	345.643	3225.58
MCF10A	IVERMECTIN	48	10	3582	345.643	3225.58
MCF10A	'DEOXYSAPPANONE B 7,4-DIMETHYL ETHER'	48	5000	177	345.643	3225.58
MCF10A	BAICALEIN	48	5000	2802	345.643	3225.58
MCF10A	TILORONE	48	10	3343	345.643	3225.58
MCF10A	IVERMECTIN	48	5000	3163	345.643	3225.58
MCF10A	TRICLOSAN	48	10	3592	345.643	3225.58
MCF10A	ERGOSTEROL	48	100	3193	345.643	3225.58
MCF10A	'12-HYDROXY-4,4-BISNOR-4,8,11,13-PODOCARPATETRAEN-3-ONE'	48	1000	3424	345.643	3225.58
MCF10A	SOLIFENACIN SUCCINATE	48	5000	3263	345.643	3225.58
MCF10A	MUNDULONE	48	10	3787	345.643	3225.58
MCF10A	CAPTAMINE	48	5000	3631	345.643	3225.58
MCF10A	IFOSFAMIDE	48	1	3387	345.643	3225.58
MCF10A	CHLORANIL	48	10	3666	345.643	3225.58
MCF10A	THEOBROMINE	48	1	3448	345.643	3225.58
MCF10A	MUNDULONE	48	100	3729	345.643	3225.58
MCF10A	SOLIFENACIN SUCCINATE	48	100	3951	345.643	3225.58
MCF10A	LIOTHYRONINE (L- isomer) SODIUM	48	1	3474	345.643	3225.58
MCF10A	TILORONE	48	100	3472	345.643	3225.58
MCF10A	ACRIFLAVINIUM HYDROCHLORIDE	48	1	3524	345.643	3225.58
MCF10A	THEOBROMINE	48	5000	2832	345.643	3225.58
MCF10A	SODIUM MONOFLUOROPHOSPHATE	48	1000	3599	345.643	3225.58
MCF10A	ACECAINIDE HYDROCHLORIDE	48	5000	2667	345.643	3225.58
MCF10A	RHODOCLADONIC ACID	48	5000	3909	345.643	3225.58
MCF10A	ORSELLINIC ACID	48	1000	3628	345.643	3225.58
MCF10A	MUNDULONE	48	5000	3418	345.643	3225.58
MCF10A	IFOSFAMIDE	48	5000	3249	345.643	3225.58
MCF10A	RHODOCLADONIC ACID	48	100	3968	345.643	3225.58
MCF10A	'12-HYDROXY-4,4-BISNOR-4,8,11,13-PODOCARPATETRAEN-3-ONE'	48	5000	3593	345.643	3225.58
MCF10A	SODIUM MONOFLUOROPHOSPHATE	48	1	2781	345.643	3225.58
MCF10A	HOMOPTEROCARPIN	48	5000	2258	345.643	3225.58
MCF10A	ISOKOBUSONE	48	100	3893	345.643	3225.58
MCF10A	DEOXYKHIVORIN	48	10	3381	345.643	3225.58
MCF10A	ROCCELLIC ACID	48	1000	3891	345.643	3225.58
MCF10A	SULISOBENZONE	48	5000	3017	345.643	3225.58
MCF10A	TRICHLORMETHINE HYDROCHLORIDE	48	100	3621	345.643	3225.58
MCF10A	TRICHLORMETHINE HYDROCHLORIDE	48	10	3690	345.643	3225.58
MCF10A	'12-HYDROXY-4,4-BISNOR-4,8,11,13-PODOCARPATETRAEN-3-ONE'	48	1	3797	345.643	3225.58
MCF10A	HYMECHROME	48	1	3483	345.643	3225.58
MCF10A	DEOXYKHIVORIN	48	5000	3536	345.643	3225.58
MCF10A	BUSSEIN	48	100	3285	345.643	3225.58
MCF10A	TILORONE	48	1000	3077	345.643	3225.58
MCF10A	CHLORANIL	48	1	3626	345.643	3225.58
MCF10A	MEGLUTOL	48	1000	3369	345.643	3225.58
MCF10A	ISOPOMIFERIN	48	1	3931	345.643	3225.58
MCF10A	CARAPIN-8(9)-ENE	48	1000	3328	345.643	3225.58
MCF10A	SULISOBENZONE	48	1000	3839	345.643	3225.58
MCF10A	CARAPIN-8(9)-ENE	48	5000	3591	345.643	3225.58
MCF10A	THEANINE POTASSIUM	48	10	3458	345.643	3225.58
MCF10A	CAPTAMINE	48	10	3352	345.643	3225.58
MCF10A	HOMOPTEROCARPIN	48	100	3292	345.643	3225.58
MCF10A	GLYBURIDE	48	100	3291	345.643	3225.58
MCF10A	MANGIFERIN	48	5000	3643	345.643	3225.58
MCF10A	CHLORMEZANONE	48	1000	3873	345.643	3225.58
MCF10A	MEGLUTOL	48	1	3326	345.643	3225.58
MCF10A	ORSELLINIC ACID	48	10	3564	345.643	3225.58
MCF10A	TRICLOSAN	48	1	3239	345.643	3225.58
MCF10A	ACECAINIDE HYDROCHLORIDE	48	1000	3116	345.643	3225.58
MCF10A	GLYBURIDE	48	5000	2569	345.643	3225.58
MCF10A	GLYBURIDE	48	10	3445	345.643	3225.58
MCF10A	TRICLOSAN	48	100	3701	345.643	3225.58
MCF10A	CHLORMEZANONE	48	10	3773	345.643	3225.58
MCF10A	MEGLUTOL	48	10	3768	345.643	3225.58
MCF10A	PHLORETIN	48	5000	3260	345.643	3225.58
MCF10A	ERGOSTEROL	48	5000	3383	345.643	3225.58
MCF10A	ACRIFLAVINIUM HYDROCHLORIDE	48	100	3432	345.643	3225.58
MCF10A	DIHYDROGAMBOGIC ACID	48	1000	3815	345.643	3225.58
MCF10A	SOLASODINE	48	1000	3446	345.643	3225.58
MCF10A	MERCAPTOPURINE	48	1000	3071	345.643	3225.58
MCF10A	GLYBURIDE	48	1000	3632	345.643	3225.58
MCF10A	ORSELLINIC ACID	48	100	3014	345.643	3225.58
MCF10A	'DEOXYSAPPANONE B 7,4-DIMETHYL ETHER'	48	1000	361	345.643	3225.58
MCF10A	PHLORETIN	48	1	3436	345.643	3225.58
MCF10A	CITRULLINE	48	1	3822	345.643	3225.58
MCF10A	DIHYDROGAMBOGIC ACID	48	100	3371	345.643	3225.58
MCF10A	ISOPOMIFERIN	48	10	3487	345.643	3225.58
MCF10A	OXTRIPHYLLINE	48	1	3551	345.643	3225.58
MCF10A	LIOTHYRONINE (L- isomer) SODIUM	48	5000	3146	345.643	3225.58
MCF10A	IVERMECTIN	48	1000	3236	345.643	3225.58
MCF10A	CARAPIN-8(9)-ENE	48	1	3448	345.643	3225.58
MCF10A	TRICLOSAN	48	1000	3456	345.643	3225.58
MCF10A	CAPSANTHIN	48	100	3455	345.643	3225.58
MCF10A	CAPSANTHIN	48	1	3114	345.643	3225.58
MCF10A	THEANINE POTASSIUM	48	5000	3349	345.643	3225.58
MCF10A	ERGOSTEROL	48	1000	3831	345.643	3225.58
MCF10A	TRICLOSAN	48	5000	3856	345.643	3225.58
MCF10A	LIOTHYRONINE (L- isomer) SODIUM	48	100	3172	345.643	3225.58
MCF10A	IFOSFAMIDE	48	1000	3190	345.643	3225.58
MCF10A	TILORONE	48	5000	2858	345.643	3225.58
MCF10A	CITRULLINE	48	5000	4044	345.643	3225.58
MCF10A	DISOPYRAMIDE PHOSPHATE	48	10	3621	345.643	3225.58
MCF10A	ISOKOBUSONE	48	10	3421	345.643	3225.58
MCF10A	TAPENTADOL HYDROCHLORIDE	48	10	3941	345.643	3225.58
MCF10A	LIOTHYRONINE (L- isomer) SODIUM	48	10	3416	345.643	3225.58
MCF10A	CAPTAMINE	48	1000	4159	345.643	3225.58
MCF10A	PURPURIN	48	1	3695	345.643	3225.58
MCF10A	CHLORANIL	48	100	3672	345.643	3225.58
MCF10A	GLYBURIDE	48	1	3274	345.643	3225.58
MCF10A	MUNDULONE	48	1000	2836	345.643	3225.58
MCF10A	PHLORETIN	48	1000	3090	345.643	3225.58
MCF10A	BIOCHANIN A DIACETATE	48	1	3973	345.643	3225.58
MCF10A	BIOCHANIN A DIACETATE	48	100	3851	345.643	3225.58
MCF10A	SOLIFENACIN SUCCINATE	48	1000	3745	345.643	3225.58
MCF10A	BAICALEIN	48	1000	3420	345.643	3225.58
MCF10A	BUSSEIN	48	1000	3484	345.643	3225.58
MCF10A	'ISOTECTORIGENIN, 7-METHYL ETHER'	48	100	3075	345.643	3225.58
MCF10A	CHLORMEZANONE	48	1	3565	345.643	3225.58
MCF10A	RHODOCLADONIC ACID	48	10	3631	345.643	3225.58
MCF10A	ACRIFLAVINIUM HYDROCHLORIDE	48	5000	484	345.643	3225.58
MCF10A	'ISOTECTORIGENIN, 7-METHYL ETHER'	48	1	3189	345.643	3225.58
MCF10A	'DEOXYSAPPANONE B 7,4-DIMETHYL ETHER'	48	10	3198	345.643	3225.58
MCF10A	MERCAPTOPURINE	48	100	3195	345.643	3225.58
MCF10A	OXTRIPHYLLINE	48	5000	3749	345.643	3225.58
MCF10A	ORSELLINIC ACID	48	1	3519	345.643	3225.58
MCF10A	HYMECHROME	48	5000	3348	345.643	3225.58
MCF10A	CAPSANTHIN	48	10	3404	345.643	3225.58
MCF10A	DEOXYKHIVORIN	48	100	3714	345.643	3225.58
MCF10A	MANGIFERIN	48	10	3405	345.643	3225.58
MCF10A	THEANINE POTASSIUM	48	100	3406	345.643	3225.58
MCF10A	BIOCHANIN A DIACETATE	48	5000	2851	345.643	3225.58
MCF10A	PURPURIN	48	10	3411	345.643	3225.58
MCF10A	SULISOBENZONE	48	100	3384	345.643	3225.58
MCF10A	ISOPOMIFERIN	48	100	3921	345.643	3225.58
MCF10A	MANGIFERIN	48	1	3328	345.643	3225.58
MCF10A	ERGOSTEROL	48	10	3610	345.643	3225.58
MCF10A	THEOBROMINE	48	10	3679	345.643	3225.58
MCF10A	THEOBROMINE	48	1000	3311	345.643	3225.58
MCF10A	CITRULLINE	48	1000	3638	345.643	3225.58
MCF10A	SULISOBENZONE	48	10	3442	345.643	3225.58
MCF10A	MERCAPTOPURINE	48	5000	2340	345.643	3225.58
MCF10A	CHLORANIL	48	5000	3331	345.643	3225.58
MCF10A	BAICALEIN	48	100	2808	345.643	3225.58
MCF10A	DISOPYRAMIDE PHOSPHATE	48	5000	3076	345.643	3225.58
MCF10A	TAPENTADOL HYDROCHLORIDE	48	1000	3185	345.643	3225.58
MCF10A	ISOPOMIFERIN	48	5000	2211	345.643	3225.58
MCF10A	ISOKOBUSONE	48	5000	3372	345.643	3225.58
MCF10A	TILORONE	48	1	3621	345.643	3225.58
MCF10A	ACRIFLAVINIUM HYDROCHLORIDE	48	10	3589	345.643	3225.58
MCF10A	MEGLUTOL	48	100	3378	345.643	3225.58
MCF10A	BUSSEIN	48	5000	3728	345.643	3225.58
MCF10A	DIMETHYL GAMBOGINATE	48	10	3690	345.643	3225.58
MCF10A	HOMOPTEROCARPIN	48	10	3509	345.643	3225.58
MCF10A	DIHYDROGAMBOGIC ACID	48	1	3030	345.643	3225.58
MCF10A	DIMETHYL GAMBOGINATE	48	1	3613	345.643	3225.58
MCF10A	CAPTAMINE	48	100	3444	345.643	3225.58
MCF10A	CHLORANIL	48	1000	3488	345.643	3225.58
MCF10A	IVERMECTIN	48	1	3231	345.643	3225.58
MCF10A	SOLIFENACIN SUCCINATE	48	10	3234	345.643	3225.58
MCF10A	BIPERIDEN	48	5000	3387	345.643	3225.58
MCF10A	'ISOTECTORIGENIN, 7-METHYL ETHER'	48	5000	2996	345.643	3225.58
MCF10A	BUSSEIN	48	1	3247	345.643	3225.58
MCF10A	MUNDULONE	48	1	3716	345.643	3225.58
MCF10A	'12-HYDROXY-4,4-BISNOR-4,8,11,13-PODOCARPATETRAEN-3-ONE'	48	10	3290	345.643	3225.58
MCF10A	SOLASODINE	48	100	3645	345.643	3225.58
MCF10A	BIPERIDEN	48	100	3389	345.643	3225.58
MCF10A	ERGOSTEROL	48	1	3352	345.643	3225.58
MCF10A	MERCAPTOPURINE	48	1	3000	345.643	3225.58
MCF10A	PURPURIN	48	5000	3500	345.643	3225.58
MCF10A	SODIUM MONOFLUOROPHOSPHATE	48	5000	2929	345.643	3225.58
MCF10A	DIHYDROGAMBOGIC ACID	48	10	3205	345.643	3225.58
MCF10A	PHLORETIN	48	10	3536	345.643	3225.58
MCF10A	THEOBROMINE	48	100	3989	345.643	3225.58
MCF10A	DIMETHYL GAMBOGINATE	48	100	3748	345.643	3225.58
MCF10A	SOLIFENACIN SUCCINATE	48	1	3565	345.643	3225.58
MCF10A	CHLORMEZANONE	48	5000	4160	345.643	3225.58
MCF10A	MEGLUTOL	48	5000	2782	345.643	3225.58
MCF10A	OXTRIPHYLLINE	48	1000	3710	345.643	3225.58
MCF10A	BUSSEIN	48	10	3215	345.643	3225.58
MCF10A	CHLORMEZANONE	48	100	3684	345.643	3225.58
MCF10A	OXTRIPHYLLINE	48	10	3376	345.643	3225.58
MCF10A	ISOPOMIFERIN	48	1000	3085	345.643	3225.58
MCF10A	OXTRIPHYLLINE	48	100	3735	345.643	3225.58
MCF10A	'ISOTECTORIGENIN, 7-METHYL ETHER'	48	10	3299	345.643	3225.58
MCF10A	CAPSANTHIN	48	1000	3639	345.643	3225.58
MCF10A	HOMOPTEROCARPIN	48	1	3182	345.643	3225.58
MCF10A	TRICHLORMETHINE HYDROCHLORIDE	48	1000	3467	345.643	3225.58
MCF10A	BAICALEIN	48	10	3228	345.643	3225.58
MCF10A	HOMOPTEROCARPIN	48	1000	3436	345.643	3225.58
MCF10A	BIPERIDEN	48	1	3449	345.643	3225.58
MCF10A	DIMETHYL GAMBOGINATE	48	5000	3719	345.643	3225.58
MCF10A	SODIUM MONOFLUOROPHOSPHATE	48	10	3958	345.643	3225.58
MCF10A	MERCAPTOPURINE	48	10	3585	345.643	3225.58
MCF10A	TRICHLORMETHINE HYDROCHLORIDE	48	1	3243	345.643	3225.58
MCF10A	TRICHLORMETHINE HYDROCHLORIDE	48	5000	3680	345.643	3225.58
MCF10A	'DEOXYSAPPANONE B 7,4-DIMETHYL ETHER'	48	100	3384	345.643	3225.58
[truncated: 7,921 more rows]
