# Supplementary material for: Cohesin mutations are synthetic lethal with stimulation of WNT signaling
Source: eLife. 2020 Dec 7;9:e61405. doi: 10.7554/eLife.61405 (PMC7746233; doi:10.7554/eLife.61405)
Supplement: Figure 5—source data 2. [file elife-61405-fig5-data2.xlsx]

## Sheet: Fig5c
Total beta-catenin
Normalized signal	WT			RAD21+/-			SMC3+/-			STAG2-/-
LY100 nM	1.2	0.9873	1.21	1.79189	1.43336	1.612	2.43	1.4298	1.903	1.64634	1.483	2.143
beta-catenin (Ser675)
Normalized signal	WT			RAD21+/-			SMC3+/-			STAG2-/-
LY100 nM	1.00339	1.20054	0.800058	1.2	1.78592	1.49009	2.33511	1.78671	1.51113	2.1	1.70939	1.68
