# Supplementary material for: Cohesin mutations are synthetic lethal with stimulation of WNT signaling
Source: eLife. 2020 Dec 7;9:e61405. doi: 10.7554/eLife.61405 (PMC7746233; doi:10.7554/eLife.61405)
Supplement: Figure 6—source data 1. [file elife-61405-fig6-data1.xlsx]

## Sheet: CMK_WT_4hr_vs_0hr_DESEQ
Ensemble ID	BaseMean	log2FoldChange	lfcSE	stat	pvalue	padj	hgnc_symbol
ENSG00000157933	4872.68	0.835498	0.146656	5.69699	1.21939e-08	2.37717e-06	SKI
ENSG00000157870	1087.88	-0.479512	0.119973	-3.99685	6.41917e-05	0.00385433	FAM213B
ENSG00000054523	303.384	-0.636864	0.1793	-3.55195	0.000382393	0.0151454	KIF1B
ENSG00000271895	118.997	0.951758	0.257772	3.69224	0.000222285	0.010142
ENSG00000162496	201.354	-1.13712	0.222523	-5.11012	3.21952e-07	4.23931e-05	DHRS3
ENSG00000117298	4074.35	0.366968	0.109302	3.35736	0.000786906	0.0261333	ECE1
ENSG00000261326	379.252	0.743567	0.216479	3.43482	0.000592942	0.0212426
ENSG00000117308	1305.77	-0.376482	0.119536	-3.14953	0.00163531	0.0432914	GALE
ENSG00000187010	617.423	-0.913	0.192789	-4.73575	2.18247e-06	0.000230712	RHD
ENSG00000188672	1318.22	-0.699503	0.183914	-3.80341	0.000142716	0.00716492	RHCE
ENSG00000204178	3565.43	-0.376483	0.104129	-3.61552	0.00029974	0.0127101	TMEM57
ENSG00000204138	4347.67	-0.364532	0.0877655	-4.15348	3.2746e-05	0.00232962	PHACTR4
ENSG00000187513	2541.96	-0.804687	0.131512	-6.11874	9.43203e-10	2.32105e-07	GJA4
ENSG00000241014	64.4337	1.10379	0.335584	3.28916	0.00100488	0.0308472
ENSG00000117400	1825.1	-0.453271	0.118132	-3.83697	0.00012456	0.00646979	MPL
ENSG00000066322	3692.68	-0.400947	0.0987491	-4.06027	4.9017e-05	0.00316545	ELOVL1
ENSG00000058799	703.445	-0.391503	0.119187	-3.28479	0.00102058	0.0311158	YIPF1
ENSG00000116212	1041.14	-0.587266	0.133508	-4.39875	1.08877e-05	0.000954541	LRRC42
ENSG00000116133	11719.6	-0.491165	0.156182	-3.14483	0.00166185	0.0436308	DHCR24
ENSG00000177606	24.8812	1.50155	0.459125	3.27046	0.00107374	0.0324304	JUN
ENSG00000162599	1127.15	0.736777	0.158496	4.64855	3.3428e-06	0.000334525	NFIA
ENSG00000118454	1213.2	0.404505	0.11532	3.50768	0.00045203	0.0171783	ANKRD13C
ENSG00000050628	2485.8	0.551647	0.157677	3.49859	0.000467721	0.017685	PTGER3
ENSG00000077254	5305.91	0.368216	0.109793	3.35374	0.000797259	0.0262449	USP33
ENSG00000203914	208.533	-0.614758	0.174723	-3.51848	0.000434019	0.0165778	HSP90B3P
ENSG00000069712	90.7401	1.19874	0.292633	4.09641	4.19607e-05	0.00282454	KIAA1107
ENSG00000122484	1195.76	0.515568	0.117662	4.38179	1.17709e-05	0.000992658	RPAP2
ENSG00000023909	1407.34	0.415553	0.108908	3.81563	0.000135839	0.00694751	GCLM
ENSG00000117620	1016.89	0.352837	0.109607	3.21909	0.00128597	0.0365599	SLC35A3
ENSG00000170989	194.076	2.0997	0.252701	8.30902	9.64965e-17	5.79404e-14	S1PR1
ENSG00000143093	2372.61	0.506986	0.114074	4.44438	8.81471e-06	0.000797094	STRIP1
ENSG00000258634	466.365	1.04966	0.142165	7.38342	1.54279e-13	6.09441e-11
ENSG00000156150	19.689	5.27011	0.950271	5.5459	2.92438e-08	5.16446e-06	ALX3
ENSG00000197323	5724.66	0.280813	0.0849572	3.30535	0.000948586	0.0300399	TRIM33
ENSG00000143061	2217.55	0.353111	0.111302	3.17255	0.00151107	0.0407088	IGSF3
ENSG00000116824	5985.65	0.953393	0.121482	7.84804	4.22584e-15	2.18738e-12	CD2
ENSG00000143418	9044.14	0.342794	0.0899518	3.81086	0.000138484	0.00697577	CERS2
ENSG00000203783	10.1283	6.8006	1.37372	4.95049	7.40283e-07	8.68155e-05	PRR9
ENSG00000143554	259.129	0.712519	0.195072	3.6526	0.000259599	0.0112625	SLC27A3
ENSG00000160712	396.332	0.718036	0.229493	3.1288	0.00175524	0.0452712	IL6R
ENSG00000163346	411.843	-0.488824	0.152601	-3.20328	0.0013587	0.0378394	PBXIP1
ENSG00000187800	2383.78	-0.567258	0.126708	-4.47688	7.57434e-06	0.000697536	PEAR1
ENSG00000271736	257.976	1.22636	0.198674	6.1727	6.71336e-10	1.76797e-07
ENSG00000237189	18.1098	3.35601	0.656192	5.11437	3.14785e-07	4.18163e-05
ENSG00000198929	306.75	-1.09156	0.187739	-5.81426	6.09036e-09	1.28764e-06	NOS1AP
ENSG00000239887	903.388	-1.30236	0.146624	-8.88232	6.54806e-19	5.17331e-16	C1orf226
ENSG00000185630	266.618	-0.848899	0.200117	-4.24202	2.21521e-05	0.00168795	PBX1
ENSG00000198842	33.0816	2.23596	0.556542	4.01759	5.87954e-05	0.00361712	DUSP27
ENSG00000143147	1350.29	1.01734	0.147802	6.88315	5.85445e-12	1.95291e-09	GPR161
ENSG00000143153	3164.12	0.760749	0.125205	6.07604	1.23185e-09	2.98247e-07	ATP1B1
ENSG00000075945	11458.7	-0.423173	0.133462	-3.17074	0.00152051	0.0408306	KIFAP3
ENSG00000135821	22830.7	-0.457618	0.0899632	-5.08673	3.64293e-07	4.71415e-05	GLUL
ENSG00000143333	741.911	1.10028	0.204897	5.36994	7.8765e-08	1.27133e-05	RGS16
ENSG00000198756	1014.55	0.580726	0.162414	3.5756	0.000349427	0.0142534	COLGALT2
ENSG00000116679	9416.21	-0.558284	0.0964708	-5.78708	7.16211e-09	1.45284e-06	IVNS1ABP
ENSG00000150681	4291.41	0.805801	0.136466	5.90476	3.53153e-09	7.68288e-07	RGS18
ENSG00000118200	119.253	1.22188	0.304104	4.01798	5.86999e-05	0.00361712	CAMSAP2
ENSG00000116852	11487.5	0.975594	0.175279	5.56596	2.60717e-08	4.65908e-06	KIF21B
ENSG00000229191	137.5	1.45137	0.357017	4.06526	4.79791e-05	0.00314348
ENSG00000136634	16.2187	7.48522	1.2713	5.88785	3.9126e-09	8.39029e-07	IL10
ENSG00000143507	1107.24	0.870833	0.138832	6.27258	3.55106e-10	9.6918e-08	DUSP10
ENSG00000177614	850.229	-0.678786	0.202905	-3.34534	0.000821816	0.0269351	PGBD5
ENSG00000162946	384.998	-0.4822	0.154431	-3.12243	0.00179362	0.0459455	DISC1
ENSG00000054282	806.069	-0.369598	0.119563	-3.09124	0.00199322	0.0497149	SDCCAG8
ENSG00000171161	2539.83	-0.464985	0.127554	-3.6454	0.000266972	0.0114635	ZNF672
ENSG00000134452	1623.66	-0.316989	0.101923	-3.11008	0.00187039	0.0472667	FBXO18
ENSG00000048740	14416.5	0.967804	0.190794	5.0725	3.92624e-07	5.03734e-05	CELF2
ENSG00000181192	944.091	-0.394723	0.115501	-3.41747	0.000632049	0.0222194	DHTKD1
ENSG00000233968	1803.07	0.526624	0.151902	3.46688	0.000526539	0.0192778
ENSG00000254635	319.199	0.600293	0.165034	3.63739	0.000275416	0.0117451	WAC-AS1
ENSG00000095739	761.159	0.809082	0.197478	4.09707	4.18414e-05	0.00282454	BAMBI
ENSG00000165406	1825.1	-0.59459	0.17677	-3.36364	0.000769225	0.0257065	2008-03-01
ENSG00000198964	928.497	-0.415638	0.126054	-3.29729	0.000976211	0.0304408	SGMS1
ENSG00000198682	1743.48	1.02213	0.192926	5.29806	1.17041e-07	1.75691e-05	PAPSS2
ENSG00000152782	542.298	0.412199	0.120412	3.42324	0.000618792	0.0218557	PANK1
ENSG00000180628	1892.07	0.335996	0.0960333	3.49875	0.000467449	0.017685	PCGF5
ENSG00000095564	2823.38	0.378786	0.114526	3.30741	0.000941616	0.0298829	BTAF1
ENSG00000095637	151.86	-1.19107	0.216649	-5.49769	3.84788e-08	6.34731e-06	SORBS1
ENSG00000196233	1226.41	0.378213	0.117318	3.22384	0.00126484	0.0363616	LCOR
ENSG00000138166	338.785	-0.810231	0.16891	-4.79681	1.6121e-06	0.000177935	DUSP5
ENSG00000151553	404.452	0.70576	0.163542	4.31547	1.59263e-05	0.00129929	FAM160B1
ENSG00000165832	862.643	0.437436	0.112515	3.88781	0.000101152	0.00550141	TRUB1
ENSG00000165650	13279.5	-0.342329	0.104985	-3.26074	0.00111121	0.033228	PDZD8
ENSG00000110665	1411.72	-0.52596	0.159784	-3.29168	0.000995895	0.030634	C11orf21
ENSG00000269821	529.128	0.812381	0.189278	4.29199	1.77076e-05	0.00141388	KCNQ1OT1
ENSG00000129757	291.378	1.05705	0.184407	5.73213	9.9175e-09	1.95884e-06	CDKN1C
ENSG00000121236	1683.09	-0.70126	0.172748	-4.05943	4.91922e-05	0.00316545	TRIM6
ENSG00000132256	1643.19	-0.441015	0.10357	-4.25812	2.06152e-05	0.00158695	TRIM5
ENSG00000166333	4048.91	-0.320192	0.10203	-3.13821	0.00169984	0.0442992	ILK
ENSG00000133805	1773.14	1.44009	0.163989	8.78162	1.61134e-18	1.20939e-15	AMPD3
ENSG00000110315	1182.54	0.471412	0.109288	4.31347	1.60713e-05	0.00130404	RNF141
ENSG00000198730	5229.15	0.750739	0.140579	5.34034	9.27699e-08	1.45059e-05	CTR9
ENSG00000205213	1377.52	-0.708097	0.12849	-5.51091	3.56976e-08	6.02086e-06	LGR4
ENSG00000066382	640.115	-0.503905	0.159703	-3.15527	0.00160348	0.042677	MPPED2
ENSG00000109911	551.516	-0.506562	0.143675	-3.52574	0.000422298	0.0162959	ELP4
ENSG00000026508	5497.32	0.609793	0.182141	3.34792	0.000814201	0.0267439	CD44
ENSG00000165912	361.775	-0.576328	0.15748	-3.6597	0.000252512	0.0111484	PACSIN3
ENSG00000166902	3288.71	-0.382741	0.107082	-3.57427	0.0003512	0.0142869	MRPL16
ENSG00000168569	692.306	0.4166	0.126199	3.30114	0.00096293	0.0302671	TMEM223
ENSG00000245532	8398.15	0.51376	0.16217	3.16803	0.00153477	0.0411401	NEAT1
ENSG00000167797	1830.92	-0.590898	0.122524	-4.82272	1.41611e-06	0.000159829	CDK2AP2
ENSG00000085733	110.958	0.944486	0.284822	3.31606	0.000912961	0.029283	CTTN
ENSG00000137478	4043.82	0.652199	0.137037	4.7593	1.94269e-06	0.000209797	FCHSD2
ENSG00000062282	635.98	-0.588769	0.129195	-4.5572	5.18409e-06	0.000502054	DGAT2
ENSG00000254810	24.3735	1.66152	0.467928	3.5508	0.000384062	0.0151715
ENSG00000137507	724.215	2.48663	0.487292	5.10294	3.34409e-07	4.36506e-05	LRRC32
ENSG00000149269	2115.9	-0.472623	0.0976809	-4.83844	1.30863e-06	0.000148817	PAK1
ENSG00000137494	161.447	0.578772	0.181872	3.1823	0.0014611	0.039447	ANKRD42
ENSG00000166012	5195.95	0.35577	0.110475	3.22036	0.00128031	0.0365376	TAF1D
ENSG00000149218	1364.79	-0.919799	0.117632	-7.81931	5.31152e-15	2.65771e-12	ENDOD1
ENSG00000149212	6908.91	-0.666755	0.199678	-3.33915	0.000840365	0.0274253	SESN3
ENSG00000110330	2097.44	0.442888	0.121973	3.63103	0.000282289	0.0120041	BIRC2
ENSG00000260966	188.082	1.06157	0.190335	5.57738	2.44164e-08	4.46969e-06
ENSG00000150764	112.991	-0.769656	0.216467	-3.55554	0.000377202	0.0149793	DIXDC1
ENSG00000160588	493.95	0.776106	0.203558	3.81269	0.00013746	0.00694751	MPZL3
ENSG00000186174	1770.89	0.846565	0.191275	4.4259	9.60409e-06	0.000858136	BCL9L
ENSG00000196914	7650.68	0.359274	0.0983156	3.65429	0.000257891	0.0112535	ARHGEF12
ENSG00000109971	114209	-0.540258	0.146512	-3.68746	0.000226504	0.0103032	HSPA8
ENSG00000255455	282.965	0.60939	0.175189	3.47847	0.000504286	0.0187372
ENSG00000177406	127.961	0.793747	0.240369	3.3022	0.000959281	0.0302516
ENSG00000111186	188.563	-0.873307	0.193466	-4.514	6.36153e-06	0.000604386	WNT5B
ENSG00000004478	5051.82	-0.462325	0.140345	-3.29421	0.000986974	0.0304501	FKBP4
ENSG00000059804	3111.18	-0.52372	0.158131	-3.31194	0.000926507	0.0294657	SLC2A3
ENSG00000065970	1483.2	0.408613	0.126476	3.23075	0.00123467	0.0358484	FOXJ2
ENSG00000111728	51.9088	1.92481	0.404815	4.75478	1.9866e-06	0.000213006	ST8SIA1
ENSG00000139174	2505.02	-0.582113	0.150032	-3.87994	0.000104484	0.00564173	PRICKLE1
ENSG00000211584	1612.6	-0.429031	0.131343	-3.2665	0.00108886	0.0326897	SLC48A1
ENSG00000111424	563.738	2.90622	0.472332	6.15293	7.60662e-10	1.96867e-07	VDR
ENSG00000134291	3414.38	-0.385378	0.0972312	-3.96352	7.3852e-05	0.00429687	TMEM106C
ENSG00000167550	67.5535	-1.17476	0.287438	-4.08701	4.36977e-05	0.00290242	RHEBL1
ENSG00000110911	1731.94	-0.415441	0.122836	-3.38209	0.000719372	0.0243758	SLC11A2
ENSG00000123405	14307.8	-0.51927	0.0975041	-5.32562	1.00608e-07	1.55553e-05	NFE2
ENSG00000139531	890.785	-0.346915	0.10759	-3.22442	0.00126229	0.0363616	SUOX
ENSG00000111110	1467.51	-0.63103	0.131011	-4.81661	1.46018e-06	0.000163573	PPM1H
ENSG00000111605	8311.98	0.351311	0.0961112	3.65526	0.000256923	0.0112439	CPSF6
ENSG00000257815	127.589	0.801014	0.210052	3.8134	0.000137069	0.00694751
ENSG00000127329	250.608	1.76911	0.208084	8.50188	1.86552e-17	1.33349e-14	PTPRB
ENSG00000091039	12306.8	0.608151	0.102275	5.94625	2.74349e-09	6.23978e-07	OSBPL8
ENSG00000059758	2037.16	0.551067	0.117273	4.69899	2.61447e-06	0.000270661	CDK17
ENSG00000136051	3176.62	0.581009	0.116797	4.97451	6.5413e-07	7.85532e-05	KIAA1033
ENSG00000076555	303.144	-1.00412	0.201704	-4.97822	6.41717e-07	7.7684e-05	ACACB
ENSG00000110921	678.691	-0.578128	0.137114	-4.21641	2.48223e-05	0.00185377	MVK
ENSG00000186815	921.895	0.731563	0.162123	4.51238	6.41031e-06	0.00060519	TPCN1
ENSG00000121743	19.1855	1.74951	0.547498	3.19547	0.00139604	0.0385929	GJA3
ENSG00000165474	361.649	2.04424	0.4571	4.47218	7.74266e-06	0.00070869	GJB2
ENSG00000120694	4709.19	-0.490704	0.153071	-3.20573	0.0013472	0.0375888	HSPH1
ENSG00000133121	238.244	0.651399	0.158247	4.11633	3.84946e-05	0.00263855	STARD13
ENSG00000120690	5405.53	0.346394	0.106621	3.24883	0.00115879	0.0340403	ELF1
ENSG00000102804	3524.99	0.549227	0.147324	3.72802	0.00019299	0.00908174	TSC22D1
ENSG00000139668	1858.49	-0.380257	0.0973583	-3.90575	9.39332e-05	0.00516916	WDFY2
ENSG00000136114	105.113	-1.39544	0.351097	-3.97452	7.05219e-05	0.00418421	THSD1
ENSG00000197991	189.763	-0.627223	0.182495	-3.43693	0.000588357	0.0211288	PCDH20
ENSG00000136153	3914.37	1.21733	0.33785	3.60317	0.000314354	0.0132178	LMO7
ENSG00000227354	72.3552	1.28599	0.319724	4.02219	5.76599e-05	0.00359142	RBM26-AS1
ENSG00000102471	46.3272	1.79713	0.456367	3.93791	8.21953e-05	0.00467361	NDFIP2
ENSG00000184564	1205.02	-0.778296	0.179087	-4.34592	1.38695e-05	0.00114393	SLITRK6
ENSG00000125266	2132.25	0.800971	0.122759	6.52475	6.81168e-11	2.08674e-08	EFNB2
ENSG00000185989	6728.63	0.608935	0.117787	5.16978	2.3437e-07	3.25591e-05	RASA3
ENSG00000258441	908.736	0.607725	0.124725	4.87251	1.10189e-06	0.000126263	LINC00641
ENSG00000251002	409.799	1.72528	0.172227	10.0175	1.27693e-23	2.73828e-20
ENSG00000211829	309.985	1.08837	0.2452	4.43872	9.04972e-06	0.000813445	TRDC
ENSG00000139880	259.436	0.670635	0.188031	3.56661	0.000361622	0.0145922	CDH24
ENSG00000213903	186.752	0.912359	0.216967	4.20505	2.61027e-05	0.00192072	LTB4R
ENSG00000257621	1041.62	0.342492	0.108926	3.14426	0.00166505	0.0436308
ENSG00000100592	1194.92	0.589811	0.125199	4.71098	2.4653e-06	0.000258787	DAAM1
ENSG00000089775	660.11	0.443081	0.129112	3.43176	0.000599678	0.0213217	ZBTB25
ENSG00000126804	2490.96	0.348606	0.0978186	3.5638	0.000365525	0.0146708	ZBTB1
ENSG00000081181	277.926	-0.713622	0.188445	-3.7869	0.000152537	0.00758188	ARG2
ENSG00000119608	83.3931	1.51442	0.3666	4.13099	3.61212e-05	0.00251026	PROX2
ENSG00000100629	365.017	-0.60211	0.161536	-3.7274	0.000193467	0.00908174	CEP128
ENSG00000119714	12.9905	7.17577	1.39597	5.14034	2.74245e-07	3.70874e-05	GPR68
ENSG00000229645	131.193	1.04094	0.259024	4.01869	5.85228e-05	0.00361712	LINC00341
ENSG00000176438	239.382	0.553896	0.163171	3.39457	0.000687361	0.0236827	SYNE3
ENSG00000156381	185.282	-0.718703	0.184489	-3.89564	9.7938e-05	0.00534599	ANKRD9
ENSG00000188626	132.079	0.653902	0.204675	3.19483	0.00139912	0.038607	GOLGA8M
ENSG00000261559	244.865	0.602827	0.161954	3.72222	0.000197478	0.00923472
ENSG00000137801	9598.58	1.31191	0.193088	6.79435	1.08803e-11	3.47499e-09	THBS1
ENSG00000150667	63.2791	1.66324	0.328347	5.06551	4.07319e-07	5.13804e-05	FSIP1
ENSG00000261136	111.371	2.78213	0.294724	9.43978	3.73564e-21	4.67297e-18
ENSG00000092445	684.143	-0.528093	0.131188	-4.02547	5.68607e-05	0.0035564	TYRO3
ENSG00000166947	620.959	-0.896569	0.239925	-3.73687	0.000186328	0.00890754	EPB42
ENSG00000244879	254.047	0.641391	0.16113	3.98058	6.87468e-05	0.00411139	GABPB1-AS1
ENSG00000137869	9.63908	4.2036	1.02792	4.08942	4.32462e-05	0.0028852	CYP19A1
ENSG00000140280	379.958	0.581429	0.158519	3.66788	0.000244567	0.0108856	LYSMD2
ENSG00000137871	2030.5	0.367046	0.111426	3.29407	0.00098748	0.0304501	ZNF280D
ENSG00000171914	283.151	-0.632198	0.159197	-3.97117	7.15204e-05	0.00419372	TLN2
ENSG00000241839	1160.7	-0.352588	0.107855	-3.2691	0.0010789	0.0325207	PLEKHO2
ENSG00000138623	2971.67	-0.45985	0.141226	-3.25612	0.00112945	0.0335064	SEMA7A
ENSG00000140386	387.251	-0.440884	0.13422	-3.28478	0.0010206	0.0311158	SCAPER
ENSG00000225193	356.138	0.517073	0.161916	3.19347	0.00140576	0.0386979	RPS12P26
ENSG00000140553	3924.62	-0.319454	0.102048	-3.13043	0.00174549	0.0450972	UNC45A
ENSG00000068305	3920.95	0.524952	0.148563	3.53353	0.000410057	0.0159375	MEF2A
ENSG00000131873	3943.03	0.426451	0.115027	3.70742	0.000209383	0.00967092	CHSY1
ENSG00000198736	579.2	-0.522556	0.130662	-3.99929	6.35331e-05	0.00384554	MSRB1
ENSG00000184207	1251.79	-0.34765	0.107778	-3.22563	0.00125697	0.0363616	PGP
ENSG00000260565	192.585	0.70354	0.218176	3.22465	0.00126128	0.0363616	ERVK13-1
ENSG00000167977	2556.51	0.342801	0.10101	3.39374	0.000689452	0.0236827	KCTD5
ENSG00000167984	3593.35	1.15802	0.167756	6.90301	5.09111e-12	1.73688e-09	NLRC3
ENSG00000187555	10656.7	0.602143	0.131036	4.59523	4.32263e-06	0.000426888	USP7
ENSG00000166669	974.504	0.683318	0.117936	5.79399	6.87337e-09	1.41337e-06	ATF7IP2
ENSG00000085721	6281.41	0.932792	0.0972445	9.59224	8.61968e-22	1.17627e-18	RRN3
ENSG00000188599	232.9	0.784696	0.191694	4.09347	4.24958e-05	0.00284779	NPIPP1
ENSG00000250251	266.8	0.827363	0.221126	3.74158	0.000182866	0.00879807	PKD1P6
ENSG00000103489	869.987	-0.481456	0.134907	-3.56878	0.000358643	0.0145503	XYLT1
ENSG00000103365	5220.35	0.357305	0.0947268	3.77195	0.00016198	0.00797205	GGA2
ENSG00000090905	4665.77	0.315157	0.0894814	3.52204	0.000428247	0.016441	TNRC6A
ENSG00000184730	1426.81	0.620916	0.19748	3.14419	0.00166548	0.0436308	APOBR
ENSG00000174943	391.224	0.679675	0.192379	3.53299	0.000410886	0.0159375	KCTD13
ENSG00000140807	835.637	5.02071	0.630671	7.96091	1.70783e-15	9.15578e-13	NKD1
ENSG00000261685	21.7063	3.92581	0.708462	5.54132	3.00206e-08	5.17975e-06
ENSG00000140853	2321.77	-0.440001	0.109001	-4.03666	5.42164e-05	0.00341951	NLRC5
ENSG00000125170	1360.88	1.35102	0.161257	8.3781	5.37905e-17	3.51065e-14	DOK4
ENSG00000103066	423.95	-0.541279	0.169764	-3.18843	0.00143049	0.0389991	PLA2G15
ENSG00000157350	3009.66	-0.454785	0.108075	-4.20806	2.5757e-05	0.0019115	ST3GAL2
ENSG00000102984	202.314	0.736652	0.201386	3.65792	0.000254271	0.0111931	ZNF821
ENSG00000140948	899.488	0.355694	0.110954	3.20578	0.00134699	0.0375888	ZCCHC14
ENSG00000225614	126.434	0.84959	0.21878	3.88331	0.000103043	0.00558404	ZNF469
ENSG00000108523	2146.47	-0.365087	0.104423	-3.49624	0.000471862	0.0177968	RNF167
ENSG00000129250	731.405	-0.397591	0.11763	-3.38002	0.000724805	0.0245046	KIF1C
ENSG00000141506	599.614	1.043	0.188137	5.54384	2.95911e-08	5.16502e-06	PIK3R5
ENSG00000273290	574.269	0.584186	0.125272	4.66333	3.11137e-06	0.000315573
ENSG00000170425	1330.19	-0.58884	0.134163	-4.38899	1.13876e-05	0.000982408	ADORA2B
ENSG00000181350	80.5231	3.42491	0.323159	10.5982	3.03676e-26	7.59747e-23	FAM211A
ENSG00000179598	855.835	-0.530555	0.151171	-3.50963	0.000448734	0.0170963	PLD6
ENSG00000108557	3009.83	0.395847	0.125704	3.14904	0.0016381	0.0432914	RAI1
ENSG00000128487	1121.09	-0.479715	0.114605	-4.18582	2.84138e-05	0.00205058	SPECC1
ENSG00000160606	130.009	-0.747107	0.218595	-3.41778	0.00063135	0.0222194	TLCD1
ENSG00000076604	1521.91	-0.466962	0.121512	-3.84294	0.00012157	0.00633641	TRAF4
ENSG00000167536	1066.28	-0.565199	0.131339	-4.30335	1.68231e-05	0.0013577	DHRS13
ENSG00000092871	1189.33	0.445329	0.12925	3.44547	0.00057006	0.0206617	RFFL
ENSG00000172716	2838.97	-0.353062	0.0898095	-3.93123	8.45115e-05	0.00475132	SLFN11
ENSG00000126351	464.75	-0.590212	0.149062	-3.95952	7.51012e-05	0.00433594	THRA
ENSG00000126353	30.8747	5.11339	1.33019	3.84411	0.000120989	0.00633641	CCR7
ENSG00000068137	180.295	-0.943915	0.220114	-4.2883	1.80046e-05	0.00142998	PLEKHH3
ENSG00000180336	503.136	-0.593043	0.135499	-4.37672	1.20478e-05	0.00100472	C17orf104
ENSG00000108379	161.871	0.894239	0.222132	4.0257	5.68054e-05	0.0035564	WNT3
ENSG00000121104	4074.84	-1.00174	0.120409	-8.31952	8.83203e-17	5.52407e-14	FAM117A
ENSG00000005882	696.891	-0.436261	0.113512	-3.84329	0.000121396	0.00633641	PDK2
ENSG00000136444	2266.48	-0.326446	0.0934108	-3.49474	0.000474528	0.0178525	RSAD1
ENSG00000108960	1120.42	0.827123	0.134949	6.12914	8.83559e-10	2.21052e-07	MMD
ENSG00000264112	485.052	0.997071	0.224162	4.448	8.66742e-06	0.000788525
ENSG00000108375	51.3937	1.5943	0.363774	4.38266	1.17238e-05	0.000992658	RNF43
ENSG00000108389	2696.11	-0.363762	0.114144	-3.18688	0.00143819	0.0391098	MTMR4
ENSG00000008283	294.331	1.28488	0.269693	4.76422	1.89582e-06	0.000206219	CYB561
ENSG00000178607	862.073	1.13726	0.127914	8.89081	6.0667e-19	5.05929e-16	ERN1
ENSG00000108654	19833.7	0.343922	0.103753	3.3148	0.000917099	0.029353	DDX5
ENSG00000108854	2000.07	1.77496	0.15544	11.419	3.36256e-30	1.00951e-26	SMURF2
ENSG00000170412	39.1718	1.85116	0.432203	4.28308	1.84324e-05	0.00145626	GPRC5C
ENSG00000183077	1201.81	-0.332869	0.104027	-3.19983	0.00137509	0.0381543	AFMID
ENSG00000184557	326.62	-1.30356	0.180889	-7.20637	5.74616e-13	2.1038e-10	SOCS3
ENSG00000167363	161.725	-0.650326	0.199537	-3.25918	0.00111734	0.0332847	FN3K
ENSG00000141380	4623.31	0.326041	0.0958689	3.4009	0.000671637	0.0232303	SS18
ENSG00000153391	1560.43	-0.378476	0.117599	-3.21835	0.0012893	0.0365855	INO80C
ENSG00000134030	601.179	-0.452939	0.141023	-3.2118	0.00131907	0.0371492	CTIF
ENSG00000101665	186.099	2.27795	0.643851	3.53801	0.000403149	0.0157186	SMAD7
ENSG00000141627	1315.78	-0.327464	0.104144	-3.14434	0.00166463	0.0436308	DYM
ENSG00000049759	1162.84	-0.515771	0.151505	-3.40431	0.000663307	0.0229952	NEDD4L
ENSG00000172175	654.681	1.15881	0.156783	7.39113	1.4559e-13	5.90664e-11	MALT1
ENSG00000267010	43.1755	1.44341	0.35332	4.08528	4.40236e-05	0.00291118
ENSG00000141682	1765.52	0.411847	0.112749	3.65278	0.000259419	0.0112625	PMAIP1
ENSG00000141655	52.2642	4.33394	0.468013	9.26031	2.03841e-20	2.18562e-17	TNFRSF11A
ENSG00000081913	875.394	-0.483192	0.138709	-3.48349	0.000494918	0.0184806	PHLPP1
ENSG00000150637	885.014	-0.618147	0.164455	-3.75875	0.000170761	0.00835909	CD226
ENSG00000060558	1376.67	-0.465788	0.124158	-3.75158	0.000175725	0.00853662	GNA15
ENSG00000185361	1847.04	0.801448	0.104694	7.65514	1.93097e-14	8.78357e-12	TNFAIP8L1
ENSG00000087903	375.356	0.819547	0.243096	3.37129	0.000748162	0.0251245	RFX2
ENSG00000130382	2462.94	0.455538	0.144347	3.15585	0.00160029	0.042677	MLLT1
ENSG00000125735	259.453	0.971353	0.18402	5.27853	1.30224e-07	1.91647e-05	TNFSF14
ENSG00000099785	495.651	-0.670274	0.192949	-3.47385	0.00051305	0.0189689	2002-03-01
ENSG00000130164	1634.93	-0.835849	0.151842	-5.50471	3.69767e-08	6.1673e-06	LDLR
ENSG00000179218	57339.1	-0.276088	0.0837555	-3.29636	0.000979475	0.0304408	CALR
ENSG00000105011	1544.6	-0.360526	0.109788	-3.28385	0.001024	0.0311158	ASF1B
ENSG00000196684	578.926	-0.796712	0.202232	-3.9396	8.16171e-05	0.00465838	HSH2D
ENSG00000197013	338.207	0.532198	0.156877	3.39245	0.000692693	0.0237398	ZNF429
ENSG00000105738	939.751	-0.474372	0.152321	-3.11428	0.00184395	0.0469401	SIPA1L3
ENSG00000167645	3170.72	-0.424784	0.133057	-3.1925	0.00141045	0.038706	YIF1B
ENSG00000099337	667.036	-0.499947	0.150911	-3.31286	0.000923473	0.0294315	KCNK6
ENSG00000262484	15.6586	1.80965	0.579973	3.12023	0.00180708	0.0461328	CCER2
ENSG00000104783	2184.72	-0.534966	0.105943	-5.04958	4.4278e-07	5.5388e-05	KCNN4
ENSG00000104856	308.295	0.711087	0.161437	4.40473	1.05915e-05	0.000935232	RELB
ENSG00000267045	313.754	1.04667	0.272331	3.84337	0.000121357	0.00633641
ENSG00000125740	23.313	2.0254	0.50123	4.04086	5.32558e-05	0.00337309	FOSB
ENSG00000197380	59.6554	1.91358	0.444984	4.30032	1.7055e-05	0.00136905	DACT3
ENSG00000130749	4274.41	0.439164	0.113978	3.85307	0.000116645	0.00620906	ZC3H4
ENSG00000126453	1164.57	-0.48195	0.125024	-3.85486	0.000115796	0.00618581	BCL2L12
ENSG00000169136	2495.44	0.638732	0.11464	5.57161	2.52393e-08	4.56466e-06	ATF5
ENSG00000268336	43.5889	1.63472	0.388548	4.20725	2.585e-05	0.0019115	SIGLEC20P
ENSG00000125505	4274.91	-0.425632	0.136756	-3.11236	0.001856	0.0471412	MBOAT7
ENSG00000170892	848.141	-0.440883	0.13281	-3.31965	0.000901293	0.0289707	TSEN34
ENSG00000267265	86.0093	0.873845	0.268919	3.24947	0.00115618	0.0340303
ENSG00000268593	11.6793	2.29327	0.693929	3.30476	0.000950568	0.0300399
ENSG00000176593	427.5	0.613431	0.19615	3.12736	0.00176386	0.0454157
ENSG00000134326	2528.77	0.769994	0.163852	4.69933	2.61021e-06	0.000270661	CMPK2
ENSG00000134318	5326.4	0.308955	0.0925418	3.33855	0.00084217	0.0274253	ROCK2
ENSG00000151779	3649.1	-0.390316	0.104627	-3.73053	0.000191074	0.00907664	NBAS
ENSG00000183891	253.875	0.561415	0.162969	3.44492	0.000571221	0.0206617	TTC32
ENSG00000143878	849.549	1.0504	0.125114	8.39556	4.6366e-17	3.16364e-14	RHOB
ENSG00000163171	3537.56	0.316729	0.0986026	3.21218	0.00131734	0.0371492	CDC42EP3
ENSG00000229692	772.655	-0.385566	0.119702	-3.22104	0.00127724	0.0365376	SOS1-IT1
ENSG00000115970	1338.96	-0.439044	0.110856	-3.96048	7.47978e-05	0.0043351	THADA
ENSG00000152518	3998.2	-0.816541	0.182048	-4.48529	7.28141e-06	0.000677467	ZFP36L2
ENSG00000116016	9200.88	2.52554	0.152288	16.584	9.0961e-62	1.36542e-57	EPAS1
ENSG00000119844	1911.89	0.422507	0.0988781	4.27301	1.92854e-05	0.00149971	AFTPH
ENSG00000115956	20375.4	-0.335898	0.092215	-3.64256	0.000269941	0.0115444	PLEK
ENSG00000144036	1264.51	-0.512644	0.123695	-4.14441	3.40696e-05	0.00240103	EXOC6B
ENSG00000116096	611.172	-0.536813	0.136777	-3.92474	8.68238e-05	0.00484503	SPR
ENSG00000114993	1522.35	0.473037	0.136311	3.47028	0.000519924	0.0191031	RTKN
ENSG00000159399	3905.38	0.329118	0.104747	3.14204	0.00167776	0.0438761	HK2
ENSG00000172086	784.19	1.14596	0.155746	7.35786	1.86878e-13	7.1929e-11	KRCC1
ENSG00000158050	283.003	-0.62152	0.183505	-3.38694	0.000706756	0.0241116	DUSP2
ENSG00000071073	93.7074	1.67578	0.259609	6.45501	1.08213e-10	3.24877e-08	MGAT4A
ENSG00000135953	562.324	0.431713	0.135515	3.18571	0.00144399	0.0391367	MFSD9
ENSG00000272994	178.987	0.870785	0.204696	4.25403	2.09957e-05	0.00160799
ENSG00000172965	5679.99	0.352089	0.0978519	3.59818	0.000320446	0.013387	MIR4435-1HG
ENSG00000227992	748.939	0.563684	0.153979	3.66079	0.000251434	0.0111336
ENSG00000271590	130.083	1.03787	0.265141	3.9144	9.06292e-05	0.00503865
ENSG00000153214	1832.86	0.445668	0.143263	3.11085	0.00186551	0.0472394	TMEM87B
ENSG00000144136	4208.09	-0.436699	0.107922	-4.04643	5.20056e-05	0.00330787	SLC20A1
ENSG00000125538	3251.17	-1.12139	0.12013	-9.33477	1.01209e-20	1.16865e-17	IL1B
ENSG00000169967	1759.21	0.342217	0.10629	3.21967	0.0012834	0.0365561	MAP3K2
ENSG00000136720	1767.86	-0.768189	0.108682	-7.06822	1.56933e-12	5.56462e-10	HS6ST1
ENSG00000144228	1455.02	1.30917	0.107612	12.1657	4.73601e-34	1.77731e-30	SPOPL
ENSG00000204406	535.148	-0.430741	0.13066	-3.29665	0.000978467	0.0304408	MBD5
ENSG00000073737	671.785	-1.20461	0.14595	-8.25358	1.5372e-16	8.54626e-14	DHRS9
ENSG00000081479	872.525	-0.394985	0.121552	-3.2495	0.00115608	0.0340303	LRP2
ENSG00000071909	422.76	-0.589563	0.163913	-3.59679	0.000322164	0.0133962	MYO3B
ENSG00000170178	46.0345	1.23869	0.336804	3.67777	0.000235286	0.0106372	HOXD12
ENSG00000079156	2318.07	-0.834534	0.13268	-6.28982	3.17843e-10	8.83544e-08	OSBPL6
ENSG00000115232	38995.9	-0.259911	0.0826212	-3.14581	0.00165627	0.0436308	ITGA4
ENSG00000061676	3369.23	0.511421	0.128626	3.97604	7.00729e-05	0.00417406	NCKAP1
ENSG00000198130	1040.85	-0.527355	0.141487	-3.72722	0.000193602	0.00908174	HIBCH
ENSG00000173559	981.564	0.397653	0.112813	3.5249	0.000423646	0.016306	NABP1
ENSG00000229056	721.821	0.927312	0.154999	5.98268	2.19496e-09	5.1482e-07
ENSG00000155729	475.155	0.439411	0.13632	3.22338	0.00126688	0.0363616	KCTD18
ENSG00000013441	2806.25	0.544453	0.108451	5.02025	5.16037e-07	6.40184e-05	CLK1
ENSG00000155760	815.227	-0.558429	0.1532	-3.6451	0.000267287	0.0114635	FZD7
ENSG00000204217	1492.51	0.483227	0.142507	3.39089	0.000696652	0.023821	BMPR2
ENSG00000138413	2475.21	-0.396157	0.118114	-3.35402	0.000796453	0.0262449	IDH1
ENSG00000144407	592.607	-0.37471	0.117695	-3.18374	0.00145384	0.0393217	PTH2R
ENSG00000021826	992.91	-0.389764	0.114226	-3.41222	0.000644354	0.022494	CPS1
ENSG00000030419	3308.64	1.53955	0.15856	9.70957	2.7448e-22	5.15028e-19	IKZF2
ENSG00000138375	1264.25	-0.449033	0.130805	-3.43283	0.000597321	0.0213217	SMARCAL1
ENSG00000079308	372.004	-0.760005	0.147055	-5.16815	2.36423e-07	3.25591e-05	TNS1
ENSG00000135926	9350.12	0.56469	0.106067	5.32392	1.01553e-07	1.55553e-05	TMBIM1
ENSG00000261428	86.4424	0.835553	0.266783	3.13196	0.00173642	0.0449404
ENSG00000157985	2123.72	-0.392164	0.124231	-3.15673	0.00159551	0.042677	AGAP1
ENSG00000088888	1848.25	-0.350004	0.108874	-3.21477	0.00130549	0.0369748	MAVS
ENSG00000101236	3201.23	-0.363279	0.0893996	-4.06354	4.83339e-05	0.00314348	RNF24
ENSG00000125772	2336.84	0.393676	0.10159	3.87513	0.000106567	0.00573363	GPCPD1
ENSG00000088766	7707.6	0.760122	0.127383	5.96723	2.4132e-09	5.57301e-07	CRLS1
ENSG00000101311	2760.72	0.572215	0.124932	4.58021	4.64519e-06	0.000452786	FERMT1
ENSG00000125814	457.498	0.836786	0.175138	4.77786	1.77171e-06	0.000194126	NAPB
ENSG00000125968	578.639	-1.30279	0.224687	-5.79822	6.70231e-09	1.39734e-06	ID1
ENSG00000198959	2724.44	-0.401076	0.116309	-3.44837	0.000563975	0.0204984	TGM2
ENSG00000101445	76.9918	2.56287	0.398782	6.42674	1.30371e-10	3.76347e-08	PPP1R16B
ENSG00000101447	960.031	-0.618186	0.165146	-3.74326	0.000181647	0.00876752	FAM83D
ENSG00000172315	1976.82	-0.520847	0.145991	-3.56766	0.000360179	0.0145732	TP53RK
ENSG00000124126	8690.34	0.556945	0.0938884	5.93199	2.99282e-09	6.60666e-07	PREX1
ENSG00000087589	1268.95	1.82348	0.119684	15.2358	2.04721e-52	1.53653e-48	CASS4
ENSG00000101162	2680.59	-0.54528	0.142435	-3.82827	0.000129047	0.00667973	TUBB1
ENSG00000176659	250.348	0.706374	0.176395	4.00451	6.21463e-05	0.00378636	C20orf197
ENSG00000149679	804.103	-0.484462	0.123864	-3.91124	9.18235e-05	0.00508621	CABLES2
ENSG00000196421	19.8623	2.23962	0.551806	4.05871	4.93449e-05	0.00316545	LINC00176
ENSG00000171700	3193.73	0.627324	0.118771	5.28178	1.27933e-07	1.90139e-05	RGS19
ENSG00000125510	105.667	1.24676	0.245928	5.06963	3.98581e-07	5.07042e-05	OPRL1
ENSG00000155307	19580	1.02463	0.141354	7.24866	4.2092e-13	1.57961e-10	SAMSN1
ENSG00000180530	10136.8	0.523486	0.11618	4.5058	6.61221e-06	0.00062035	NRIP1
ENSG00000154734	1755.18	-0.723593	0.112434	-6.43571	1.22898e-10	3.6173e-08	ADAMTS1
ENSG00000273271	46.8906	1.16807	0.324673	3.59769	0.000321051	0.013387
ENSG00000256073	117.219	0.709552	0.22114	3.20861	0.00133378	0.0374387	C21orf119
ENSG00000205726	1511.97	-0.383126	0.102791	-3.72724	0.00019359	0.00908174	ITSN1
ENSG00000159200	748.599	-0.490221	0.133518	-3.67158	0.00024106	0.0107695	RCAN1
ENSG00000159216	9911.98	0.539805	0.14149	3.81515	0.000136099	0.00694751	RUNX1
ENSG00000159256	3339.11	0.374746	0.108128	3.46576	0.000528733	0.019311	MORC3
ENSG00000173276	782.676	0.458504	0.110877	4.13526	3.54553e-05	0.00248701	ZBTB21
ENSG00000160185	570.128	0.656421	0.163945	4.00391	6.2303e-05	0.00378636	UBASH3A
ENSG00000070413	1886.57	-0.353478	0.10756	-3.28634	0.001015	0.0310941	DGCR2
ENSG00000128228	449.222	-0.688674	0.145049	-4.74787	2.0557e-06	0.000218852	SDF2L1
ENSG00000261188	92.375	0.827696	0.245126	3.37661	0.000733844	0.024699
ENSG00000100219	5408.39	-0.540431	0.137307	-3.93594	8.28722e-05	0.0046853	XBP1
ENSG00000099985	244.409	-0.874628	0.167022	-5.23659	1.6357e-07	2.31636e-05	OSM
ENSG00000100003	58.8227	1.26686	0.38871	3.25913	0.00111755	0.0332847	SEC14L2
ENSG00000253352	9161.49	0.332977	0.106662	3.12178	0.00179759	0.0459688	TUG1
ENSG00000100234	29920.8	0.382507	0.106204	3.60162	0.000316243	0.0132601	TIMP3
ENSG00000100368	28834.1	-0.632609	0.160532	-3.94069	8.12471e-05	0.00465496	CSF2RB
ENSG00000128309	1749.29	-0.546827	0.140044	-3.90467	9.4354e-05	0.00516916	MPST
ENSG00000100379	220.697	-0.5239	0.163833	-3.19778	0.0013849	0.0383556	KCTD17
ENSG00000100055	174.687	1.32003	0.322047	4.09888	4.15153e-05	0.00281985	CYTH4
ENSG00000100417	99.3321	-0.753222	0.223964	-3.36313	0.000770629	0.0257065	PMM1
ENSG00000186951	947.916	-0.404843	0.13033	-3.1063	0.00189446	0.0477722	PPARA
ENSG00000180385	456.222	0.567545	0.157247	3.60927	0.000307066	0.0129841	EMC3-AS1
ENSG00000224660	204.386	1.01213	0.238976	4.23527	2.28273e-05	0.00173061	SH3BP5-AS1
ENSG00000131374	2700.69	-0.370078	0.104451	-3.54308	0.000395485	0.0155817	TBC1D5
ENSG00000160746	1119.56	-0.412784	0.115347	-3.57863	0.000345399	0.0141661	ANO10
ENSG00000011198	1013.99	-0.377601	0.118397	-3.18928	0.00142626	0.0389975	ABHD5
ENSG00000272077	99.2745	0.77713	0.222433	3.49378	0.000476241	0.0178722
ENSG00000114388	901.479	-0.369044	0.112467	-3.28136	0.00103308	0.0313283	NPRL2
ENSG00000114737	1785.43	-0.381313	0.103103	-3.69836	0.000217001	0.00996148	CISH
ENSG00000145050	4113.01	-0.427292	0.111887	-3.81897	0.00013401	0.00688913	MANF
ENSG00000164087	795.237	-0.507461	0.141849	-3.57746	0.000346943	0.0141906	POC1A
ENSG00000157445	618.618	-0.593557	0.176383	-3.36517	0.000764976	0.0256318	CACNA2D3
ENSG00000163947	336.346	1.00502	0.190868	5.26555	1.39767e-07	2.03693e-05	ARHGEF3
ENSG00000144724	1562.79	-0.365649	0.10774	-3.3938	0.000689293	0.0236827	PTPRG
ENSG00000227124	259.1	0.501226	0.159561	3.14128	0.00168211	0.0439134	ZNF717
ENSG00000064225	21.9132	2.09635	0.544688	3.84872	0.000118738	0.00627596	ST3GAL6
ENSG00000144824	19.2832	3.79686	0.771275	4.92283	8.53019e-07	9.9261e-05	PHLDB2
ENSG00000144827	1338.72	0.562485	0.113281	4.9654	6.85588e-07	8.10343e-05	ABHD10
ENSG00000031081	1104.01	1.52338	0.184501	8.25679	1.49648e-16	8.54626e-14	ARHGAP31
ENSG00000272758	35.1284	1.31442	0.388416	3.38407	0.000714207	0.0242556
ENSG00000271270	401.111	0.625904	0.149154	4.19636	2.71238e-05	0.00198612	TMCC1-AS1
ENSG00000144868	176.661	-0.772922	0.203891	-3.79087	0.000150123	0.00751163	TMEM108
ENSG00000114098	2647.46	-0.482127	0.109842	-4.38928	1.13726e-05	0.000982408	ARMC8
ENSG00000177311	379.549	0.474298	0.137955	3.43807	0.000585883	0.0210904	ZBTB38
ENSG00000114126	3215.79	-0.546929	0.130786	-4.18186	2.89131e-05	0.00207663	TFDP2
ENSG00000175040	10737.7	0.799777	0.189015	4.2313	2.32347e-05	0.00175265	CHST2
ENSG00000181804	174.798	-0.659477	0.197536	-3.33852	0.000842255	0.0274253	SLC9A9
ENSG00000181788	1895.23	-0.391153	0.105819	-3.69643	0.000218655	0.0100068	SIAH2
ENSG00000173905	3404.65	0.330421	0.106219	3.11074	0.00186616	0.0472394	GOLIM4
ENSG00000085276	2358.59	0.355523	0.0999082	3.55849	0.000372988	0.0148513	MECOM
ENSG00000078070	857.522	-0.382916	0.114864	-3.33364	0.000857168	0.0277904	MCCC1
ENSG00000073282	19.3701	2.54152	0.602672	4.2171	2.47469e-05	0.00185377	TP63
ENSG00000180611	230.281	-0.540519	0.163779	-3.3003	0.00096582	0.0302671	MB21D2
ENSG00000127249	51.1389	-0.992943	0.316874	-3.13356	0.00172698	0.0447818	ATP13A4
ENSG00000185112	560.089	0.823379	0.153913	5.34963	8.81337e-08	1.39261e-05	FAM43A
ENSG00000242086	360.767	0.581115	0.176419	3.29395	0.000987888	0.0304501	LINC00969
ENSG00000163961	1786.61	-0.400416	0.0985435	-4.06335	4.83742e-05	0.00314348	RNF168
ENSG00000174004	2246.45	-0.50656	0.143119	-3.53943	0.000400996	0.0157163	NRROS
ENSG00000161267	704.656	-0.761874	0.135023	-5.64256	1.67543e-08	3.22434e-06	BDH1
ENSG00000248302	34.1072	1.48606	0.406427	3.6564	0.000255778	0.0112266
ENSG00000068078	1992.72	0.956963	0.17153	5.57897	2.41948e-08	4.46969e-06	FGFR3
ENSG00000196526	238.415	1.19947	0.21697	5.52828	3.23378e-08	5.51616e-06	AFAP1
ENSG00000237765	364.974	0.517736	0.148983	3.47514	0.00051059	0.0189246	FAM200B
ENSG00000163257	2166.66	0.535935	0.125456	4.27189	1.9382e-05	0.00149971	DCAF16
ENSG00000174799	660.807	0.4009	0.119498	3.35488	0.000794002	0.0262449	CEP135
ENSG00000250775	84.5552	1.80646	0.291825	6.19022	6.00818e-10	1.61052e-07
ENSG00000163738	527.159	0.625402	0.168458	3.7125	0.000205221	0.00951678	MTHFD2L
ENSG00000138669	874.616	-0.543542	0.13211	-4.11432	3.88315e-05	0.00264955	PRKG2
ENSG00000138678	555.345	-0.55079	0.17788	-3.09641	0.0019588	0.0490058	AGPAT9
ENSG00000163629	2534.3	-0.423313	0.105437	-4.01483	5.94876e-05	0.00364477	PTPN13
ENSG00000172493	6078.85	-0.326139	0.104422	-3.12327	0.00178853	0.0458933	AFF1
ENSG00000163110	7322.39	0.670557	0.10259	6.53629	6.30649e-11	1.97222e-08	PDLIM5
ENSG00000168785	997.662	-0.4926	0.11932	-4.12839	3.65313e-05	0.00252705	TSPAN5
ENSG00000145348	677.304	-0.471103	0.13216	-3.56465	0.000364338	0.0146624	TBCK
ENSG00000138796	2611.3	-0.381732	0.0987861	-3.86423	0.000111442	0.00597446	HADH
ENSG00000174599	93.4012	0.842106	0.229333	3.67197	0.000240685	0.0107695	TRAM1L1
ENSG00000138738	761.662	0.644614	0.142767	4.51515	6.32711e-06	0.000604386	PRDM5
ENSG00000164056	1133.92	1.52737	0.158214	9.65385	4.73455e-22	7.89671e-19	SPRY1
ENSG00000151458	3111.78	0.50789	0.0968022	5.24668	1.54866e-07	2.23505e-05	ANKRD50
ENSG00000109452	817.129	-0.395954	0.122132	-3.24202	0.00118684	0.0347963	INPP4B
ENSG00000137460	79.0673	0.969363	0.284196	3.4109	0.000647494	0.0225511	FHDC1
ENSG00000273449	57.6139	1.06038	0.308164	3.44097	0.00057963	0.0209154
ENSG00000052802	1381.64	-0.963726	0.172124	-5.59901	2.15575e-08	4.045e-06	MSMO1
ENSG00000154447	1114.56	0.388514	0.113202	3.43204	0.000599052	0.0213217	SH3RF1
ENSG00000151718	2163.64	0.469639	0.122875	3.8221	0.000132321	0.00682565	WWC2
ENSG00000164306	511.01	-0.545839	0.130238	-4.1911	2.7761e-05	0.00201314	PRIMPOL
ENSG00000151726	742.438	0.645138	0.129565	4.97926	6.38277e-07	7.7684e-05	ACSL1
ENSG00000188242	1523.38	0.50066	0.106896	4.68361	2.81862e-06	0.000287826
ENSG00000066230	876.498	0.524916	0.166562	3.15147	0.0016245	0.0430836	SLC9A3
ENSG00000153395	1963.88	-0.38887	0.115904	-3.35511	0.000793337	0.0262449	LPCAT1
ENSG00000154122	1587.38	0.448586	0.140486	3.19309	0.00140757	0.0386979	ANKH
ENSG00000145555	523.853	1.47285	0.164891	8.93226	4.17388e-19	3.68553e-16	MYO10
ENSG00000170571	2388.85	0.386534	0.125045	3.09116	0.00199376	0.0497149	EMB
ENSG00000151883	267.362	1.06416	0.207378	5.1315	2.87448e-07	3.85258e-05	PARP8
ENSG00000134363	1303.12	-0.597828	0.1639	-3.64753	0.000264778	0.0114212	FST
ENSG00000095015	2360.29	1.54012	0.116778	13.1884	1.02376e-39	5.12257e-36	MAP3K1
ENSG00000175857	4669.34	0.567083	0.105806	5.35967	8.33727e-08	1.33139e-05	GAPT
ENSG00000145740	3298.6	0.486709	0.155324	3.13351	0.00172731	0.0447818	SLC30A5
ENSG00000171617	956.321	1.55045	0.170381	9.09989	9.04233e-20	9.04896e-17	ENC1
ENSG00000245526	174.601	0.827023	0.211787	3.90498	9.42332e-05	0.00516916	LINC00461
ENSG00000176055	749.344	0.476098	0.127137	3.74477	0.000180562	0.00874326	MBLAC2
ENSG00000113532	286.756	0.6663	0.151896	4.38656	1.15158e-05	0.00098779	ST8SIA4
ENSG00000181751	2271.84	0.329595	0.0960571	3.43124	0.00060083	0.0213217	C5orf30
ENSG00000134982	2492.24	0.424237	0.106105	3.99826	6.38103e-05	0.00384681	APC
ENSG00000172869	2771.93	0.414372	0.128228	3.23153	0.00123128	0.0358431	DMXL1
ENSG00000145779	2979.78	0.461972	0.111788	4.13256	3.58749e-05	0.00250474	TNFAIP8
ENSG00000064651	1204.52	0.601503	0.110984	5.41973	5.96906e-08	9.7393e-06	SLC12A2
ENSG00000249421	16.5305	1.75593	0.559774	3.13685	0.00170775	0.0444281	ADAMTS19-AS1
ENSG00000145808	74.1964	1.52677	0.317784	4.80443	1.55195e-06	0.000172565	ADAMTS19
ENSG00000198108	83.6491	1.27205	0.28829	4.41241	1.02227e-05	0.000908007	CHSY3
ENSG00000131437	282.335	0.59128	0.176102	3.3576	0.000786218	0.0261333	KIF3A
ENSG00000113583	1249	0.354021	0.110357	3.20795	0.00133683	0.0374387	C5orf15
ENSG00000170464	250.366	0.640597	0.206593	3.10076	0.00193025	0.0485344	DNAJC18
ENSG00000171604	3172.27	0.474065	0.128003	3.70353	0.000212616	0.00979013	CXXC5
ENSG00000230551	334.777	0.485048	0.153702	3.15576	0.00160078	0.042677
ENSG00000164574	4536.14	-0.492261	0.120547	-4.08355	4.43524e-05	0.00292006	GALNT10
ENSG00000135077	888.133	1.71983	0.433596	3.96643	7.29568e-05	0.0042613	HAVCR2
ENSG00000253522	175.631	1.04017	0.209178	4.97264	6.60479e-07	7.86861e-05	MIR146A
ENSG00000113742	701.854	0.465647	0.125421	3.71267	0.000205083	0.00951678	CPEB4
ENSG00000161021	4013.25	0.55926	0.168776	3.31364	0.000920916	0.0294125	MAML1
ENSG00000245317	22.8218	1.58538	0.456884	3.46998	0.000520497	0.0191031
ENSG00000131446	3240.8	-0.336999	0.10874	-3.09913	0.00194091	0.0487208	MGAT1
ENSG00000145982	714.625	-0.562569	0.136606	-4.1182	3.81851e-05	0.00262935	FARS2
ENSG00000153162	808.318	0.551296	0.154787	3.56165	0.00036853	0.0147507	BMP6
ENSG00000272379	31.1388	1.31173	0.403246	3.25293	0.00114223	0.033752
ENSG00000124766	3330.69	0.359032	0.10603	3.38613	0.00070887	0.0241289	SOX4
ENSG00000111913	1730.56	0.606795	0.115692	5.24493	1.56339e-07	2.23505e-05	FAM65B
ENSG00000204569	4284.81	0.494163	0.106949	4.62055	3.8272e-06	0.000380464	PPP1R10
ENSG00000137404	987.05	-0.491648	0.132439	-3.71227	0.000205412	0.00951678	NRM
ENSG00000137331	22.8151	1.75317	0.533866	3.28392	0.00102373	0.0311158	IER3
ENSG00000137193	13162.1	-1.18026	0.167032	-7.06605	1.59402e-12	5.56462e-10	PIM1
ENSG00000065491	985.821	-0.395166	0.110361	-3.58067	0.000342714	0.0140945	TBC1D22B
ENSG00000001167	3982.52	-0.293055	0.0906913	-3.23134	0.0012321	0.0358431	NFYA
ENSG00000112655	143.67	-0.705334	0.196357	-3.59209	0.000328035	0.0136026	PTK7
ENSG00000112715	4121.35	0.944814	0.164762	5.73443	9.78423e-09	1.95828e-06	VEGFA
ENSG00000146085	976.714	-0.362193	0.112461	-3.22059	0.00127925	0.0365376	MUT
ENSG00000112118	24096.9	-0.268905	0.0837133	-3.21222	0.00131714	0.0371492	MCM3
ENSG00000170915	1950.71	-0.603834	0.123261	-4.89881	9.64164e-07	0.000111331	PAQR8
ENSG00000146143	1247.67	-0.336557	0.101233	-3.32459	0.000885497	0.0285854	PRIM2
ENSG00000080007	442.176	0.475372	0.140743	3.37758	0.000731261	0.0246673	DDX43
ENSG00000118432	70.7815	1.31345	0.292893	4.48442	7.31129e-06	0.000677467	CNR1
ENSG00000132424	7354.23	0.395193	0.118591	3.33241	0.000860963	0.0278533	PNISR
ENSG00000057657	49.3112	1.25586	0.335749	3.74046	0.000183686	0.00880929	PRDM1
ENSG00000112297	18.5603	2.12516	0.577389	3.68064	0.000232651	0.0105508	AIM1
ENSG00000118689	1531.86	-0.339373	0.103565	-3.27692	0.00104947	0.0317612	FOXO3
ENSG00000080546	1827.83	-0.452443	0.121166	-3.73408	0.0001884	0.00897802	SESN1
ENSG00000135587	493.888	-0.437248	0.13159	-3.32281	0.000891147	0.028706	SMPD2
ENSG00000135547	58.8741	1.87818	0.316476	5.93466	2.94453e-09	6.59707e-07	HEY2
ENSG00000146376	2437.68	0.443502	0.126976	3.4928	0.000477987	0.0178929	ARHGAP18
ENSG00000225135	797.373	0.522569	0.156584	3.33731	0.000845934	0.0274855
ENSG00000120254	4719.54	0.343403	0.100623	3.41276	0.000643091	0.022494	MTHFD1L
ENSG00000153721	718.172	-0.48592	0.155523	-3.12443	0.00178149	0.045791	CNKSR3
ENSG00000175048	593.002	-0.425515	0.128977	-3.29916	0.000969754	0.030327	ZDHHC14
ENSG00000078269	2550.59	0.594246	0.139102	4.27202	1.93713e-05	0.00149971	SYNJ2
ENSG00000112531	9277.03	0.515285	0.103365	4.98511	6.19261e-07	7.61945e-05	QKI
ENSG00000164877	1131.97	-0.660618	0.163133	-4.04957	5.13113e-05	0.00327759	MICALL2
ENSG00000214960	651.404	-0.47115	0.124824	-3.77453	0.000160311	0.00794199	ISPD
ENSG00000106546	688.167	1.29527	0.189794	6.82462	8.81577e-12	2.87682e-09	AHR
ENSG00000233429	203.108	0.594058	0.186329	3.18822	0.00143152	0.0389991	HOTAIRM1
ENSG00000153814	148.272	1.10894	0.25636	4.3257	1.52049e-05	0.00124722	JAZF1
ENSG00000240583	236.833	-1.56494	0.25527	-6.13053	8.75865e-10	2.21052e-07	AQP1
ENSG00000132434	756.623	0.384302	0.119788	3.20819	0.00133573	0.0374387	LANCL2
ENSG00000106665	904.767	-0.40176	0.111914	-3.58991	0.000330789	0.013679	CLIP2
ENSG00000127947	3582.5	0.483012	0.102867	4.69552	2.65934e-06	0.000273421	PTPN12
ENSG00000085563	2414.63	0.694439	0.175758	3.95111	7.7788e-05	0.00447385	ABCB1
ENSG00000001629	1670.81	0.333328	0.107611	3.09754	0.00195136	0.0489013	ANKIB1
ENSG00000157259	1066.73	0.503877	0.115652	4.35685	1.31945e-05	0.00109427	GATAD1
ENSG00000105810	17298	0.296159	0.086883	3.40872	0.000652692	0.0226795	CDK6
ENSG00000166925	2925.99	-0.394196	0.107237	-3.67594	0.000236976	0.0106504	TSC22D4
ENSG00000196411	1455.66	0.356107	0.11288	3.15475	0.00160636	0.0426779	EPHB4
ENSG00000135269	3635.47	0.445554	0.0981533	4.53937	5.64232e-06	0.000542929	TES
ENSG00000077063	6341.52	0.428386	0.138655	3.08958	0.00200437	0.0498964	CTTNBP2
ENSG00000128578	206.594	0.708129	0.203574	3.47849	0.000504246	0.0187372	STRIP2
ENSG00000231721	75.5339	0.873307	0.265102	3.29422	0.00098694	0.0304501	LINC-PINT
ENSG00000146904	263.246	1.78868	0.185716	9.63129	5.8983e-22	8.85394e-19	EPHA1
ENSG00000172748	80.0608	0.906318	0.277377	3.26746	0.00108515	0.0326438	ZNF596
ENSG00000255310	408.615	0.470766	0.147534	3.19091	0.00141827	0.0388498
ENSG00000164741	5297.58	0.597408	0.106396	5.61496	1.96602e-08	3.73569e-06	DLC1
ENSG00000104765	2214.2	-0.621832	0.19067	-3.26131	0.001109	0.0332279	BNIP3L
ENSG00000092964	982.529	-0.43065	0.135761	-3.17213	0.00151326	0.0407088	DPYSL2
ENSG00000120915	168.472	-0.595475	0.186925	-3.18563	0.00144439	0.0391367	EPHX2
ENSG00000104299	1101.33	-0.49158	0.130793	-3.75847	0.000170957	0.00835909	INTS9
ENSG00000133863	7062.66	-0.359418	0.102088	-3.52068	0.000430439	0.016483	TEX15
ENSG00000147465	226.118	-0.886362	0.250519	-3.53811	0.000403003	0.0157186	STAR
ENSG00000171316	4818.96	0.506688	0.115215	4.39776	1.09374e-05	0.000954541	CHD7
ENSG00000104490	293.901	-0.722739	0.201779	-3.58183	0.00034119	0.0140703	NCALD
ENSG00000154188	609.671	0.877352	0.24041	3.6494	0.000262858	0.0113711	ANGPT1
ENSG00000177570	181.295	-0.970328	0.221541	-4.3799	1.18736e-05	0.000995725	SAMD12
ENSG00000147689	20.2422	2.21277	0.557079	3.9721	7.12414e-05	0.00419372	FAM83A
ENSG00000164983	853.802	0.463453	0.111023	4.17439	2.98782e-05	0.00213572	TMEM65
ENSG00000178209	3839.58	1.15612	0.192553	6.00418	1.92302e-09	4.58197e-07	PLEC
ENSG00000153714	187.604	1.70765	0.266413	6.4098	1.45713e-10	4.12698e-08	LURAP1L
ENSG00000214121	28.314	1.45763	0.450951	3.23235	0.00122776	0.0358431	TDPX2
ENSG00000155158	93.7704	1.04974	0.245249	4.28031	1.86632e-05	0.00146677	TTC39B
ENSG00000120156	363.494	-0.490448	0.150521	-3.25834	0.00112065	0.0333109	TEK
ENSG00000137124	1774.81	-0.463066	0.105641	-4.38339	1.16848e-05	0.000992658	ALDH1B1
ENSG00000135048	4891.7	0.382638	0.101951	3.75315	0.000174628	0.00851084	TMEM2
ENSG00000187210	980.271	-1.01697	0.137222	-7.4111	1.25256e-13	5.37206e-11	GCNT1
ENSG00000196730	2945.79	-0.462963	0.110406	-4.19329	2.74942e-05	0.00200347	DAPK1
ENSG00000106799	1949.74	-0.503458	0.145776	-3.45364	0.000553078	0.0201511	TGFBR1
ENSG00000165152	3868.41	-0.360023	0.10368	-3.47244	0.000515745	0.0190217	TMEM246
ENSG00000259953	521.14	0.602621	0.159094	3.78782	0.000151977	0.00757914
ENSG00000136848	10.1921	4.89382	1.23177	3.97299	7.09763e-05	0.00419372	DAB2IP
ENSG00000148204	14.6994	3.34671	0.719526	4.65128	3.29888e-06	0.000332345	CRB2
ENSG00000044574	21275.1	-0.366642	0.0951953	-3.85147	0.000117409	0.00622763	HSPA5
ENSG00000234771	213.07	0.78744	0.222432	3.54013	0.000399925	0.0157154
ENSG00000119333	1092.12	-0.450659	0.126555	-3.56098	0.00036948	0.0147507	WDR34
ENSG00000165702	1511.15	-1.41467	0.156932	-9.01455	1.97688e-19	1.85468e-16	GFI1B
ENSG00000148288	765.81	0.600443	0.152571	3.9355	8.3025e-05	0.0046853	GBGT1
ENSG00000148400	3878.3	0.644259	0.195206	3.30041	0.000965438	0.0302671	NOTCH1
ENSG00000165802	4409.51	0.963427	0.128043	7.52424	5.30285e-14	2.34121e-11	NSMF
ENSG00000228253	22953.4	0.559047	0.155152	3.60322	0.000314299	0.0132178	MT-ATP8
ENSG00000198899	128643	0.418232	0.128543	3.25363	0.00113939	0.0337344	MT-ATP6
ENSG00000087842	410.382	-0.500195	0.155127	-3.22443	0.00126223	0.0363616	PIR
ENSG00000102230	234.675	-0.594456	0.161668	-3.67702	0.000235973	0.0106372	PCYT1B
ENSG00000165175	1698.84	-0.645798	0.140579	-4.59383	4.35184e-06	0.000426964	MID1IP1
ENSG00000183690	193.487	-0.657537	0.172397	-3.81409	0.000136687	0.00694751	EFHC2
ENSG00000065923	393.971	-0.467526	0.13637	-3.42837	0.00060722	0.0214976	SLC9A7
ENSG00000126767	2030.79	-0.35706	0.110362	-3.23536	0.00121491	0.0355497	ELK1
ENSG00000102145	26810.3	-0.391403	0.0943645	-4.14777	3.35727e-05	0.00237717	GATA1
ENSG00000102096	3085.65	-1.24644	0.168389	-7.40215	1.33998e-13	5.58733e-11	PIM2
ENSG00000184083	387.157	0.489194	0.138739	3.52599	0.0004219	0.0162959	FAM120C
ENSG00000090776	353.351	1.28934	0.168303	7.66084	1.84714e-14	8.66481e-12	EFNB1
ENSG00000184481	671.48	-0.678621	0.131897	-5.14509	2.67397e-07	3.649e-05	FOXO4
ENSG00000147130	5476.72	-0.422795	0.107664	-3.92698	8.60176e-05	0.00481795	ZMYM3
ENSG00000102362	941.309	-0.79283	0.149259	-5.31177	1.08568e-07	1.64618e-05	SYTL4
ENSG00000147206	7161.04	0.536065	0.172593	3.10594	0.00189676	0.0477722	NXF3
ENSG00000171388	68.12	1.39499	0.36975	3.77279	0.000161435	0.00797137	APLN
ENSG00000122122	4657.99	0.899544	0.116771	7.70348	1.32406e-14	6.41142e-12	SASH3
ENSG00000123728	1865.13	0.518697	0.0995907	5.20829	1.90594e-07	2.67384e-05	RAP2C
ENSG00000102181	710.848	-0.479918	0.15411	-3.11412	0.00184496	0.0469401	CD99L2
ENSG00000147383	1606.38	-0.485773	0.142266	-3.41453	0.000638928	0.0224087	NSDHL
ENSG00000155962	1780.93	-0.502453	0.157006	-3.2002	0.0013733	0.0381543	CLIC2
ENSG00000124334	1027.2	-0.585915	0.159767	-3.66732	0.000245108	0.0108856	IL9R

## Sheet: CMK_STAG2mt_4hr_vs_0hr_DESEQ
Ensemble ID	BaseMean	log2FoldChange	lfcSE	stat	pvalue	padj	hgnc_symbol
ENSG00000157933	5016.47	1.70683	0.162506	10.5032	8.35161e-26	8.25617e-23	SKI
ENSG00000177000	1550.32	-0.468385	0.121381	-3.85881	0.000113939	0.00382746	MTHFR
ENSG00000162496	298.311	-1.2644	0.194735	-6.49291	8.41954e-11	1.51333e-08	DHRS3
ENSG00000065526	8278.82	0.277769	0.0871175	3.18845	0.00143039	0.0284026	SPEN
ENSG00000157191	2279.18	-0.30267	0.0972145	-3.11343	0.00184929	0.0343672	NECAP2
ENSG00000219481	1581.25	-0.365861	0.108228	-3.38048	0.000723596	0.0170606	NBPF1
ENSG00000169991	21.6801	1.62766	0.505923	3.21721	0.00129442	0.0267063	IFFO2
ENSG00000169914	1191.75	0.437216	0.12831	3.40749	0.000655622	0.015919	OTUD3
ENSG00000117298	2812.03	0.835536	0.146038	5.72136	1.05673e-08	1.26079e-06	ECE1
ENSG00000088280	177.764	-0.692167	0.191991	-3.6052	0.00031191	0.00872089	ASAP3
ENSG00000117308	1189.93	-0.363375	0.123038	-2.95335	0.00314344	0.0493816	GALE
ENSG00000117305	606.492	-0.431887	0.125689	-3.43617	0.000589999	0.0145295	HMGCL
ENSG00000000938	81.6424	1.47153	0.324702	4.53194	5.84443e-06	0.000316763	FGR
ENSG00000242125	3500.88	0.40274	0.136082	2.95954	0.00308101	0.0486771	SNHG3
ENSG00000162522	183.971	0.675393	0.183246	3.68571	0.000228067	0.00676781	KIAA1522
ENSG00000163866	3025.17	-0.387431	0.11893	-3.25765	0.0011234	0.0242935	SMIM12
ENSG00000116560	26151.9	0.370204	0.103978	3.56039	0.000370306	0.0100688	SFPQ
ENSG00000142687	1857.93	-0.374514	0.119112	-3.14422	0.0016653	0.0317462	KIAA0319L
ENSG00000126070	1669.95	0.399857	0.124858	3.20248	0.00136248	0.0275393	AGO3
ENSG00000183386	1635.46	0.555735	0.154742	3.59136	0.00032896	0.00910561	FHL3
ENSG00000127603	7477.71	0.3227	0.107125	3.01236	0.00259222	0.0429143	MACF1
ENSG00000085832	5143.35	0.309533	0.0932315	3.32005	0.000900026	0.0202872	EPS15
ENSG00000116212	729.648	-0.678604	0.127958	-5.30332	1.13715e-07	1.07062e-05	LRRC42
ENSG00000215883	599.293	-0.374658	0.124279	-3.01465	0.00257279	0.0428488	CYB5RL
ENSG00000162599	323.727	0.710906	0.162309	4.37994	1.18709e-05	0.000584675	NFIA
ENSG00000152760	248.691	1.02919	0.229329	4.48781	7.19581e-06	0.000377235	TCTEX1D1
ENSG00000118454	1158.83	0.504667	0.107444	4.697	2.64004e-06	0.000168156	ANKRD13C
ENSG00000077254	5394.27	0.710069	0.110587	6.42091	1.3546e-10	2.37313e-08	USP33
ENSG00000162613	9941.1	0.434186	0.0860661	5.0448	4.54002e-07	3.53e-05	FUBP1
ENSG00000137944	624.079	-0.387631	0.126553	-3.06299	0.00219137	0.0385615	CCBL2
ENSG00000023909	951.562	0.437985	0.110806	3.95271	7.72711e-05	0.00279956	GCLM
ENSG00000117528	1926.52	0.322274	0.103728	3.10692	0.00189048	0.0348857	ABCD3
ENSG00000162695	1146.68	0.456907	0.107056	4.26794	1.97287e-05	0.000886509	SLC30A7
ENSG00000170989	169.627	2.33139	0.251366	9.27489	1.77794e-20	1.06986e-17	S1PR1
ENSG00000162636	997.04	0.673178	0.131725	5.11049	3.21325e-07	2.679e-05	FAM102B
ENSG00000116337	3614.44	0.330167	0.109496	3.01532	0.00256705	0.0428388	AMPD2
ENSG00000143093	1945.41	0.550678	0.119618	4.60362	4.15203e-06	0.000237455	STRIP1
ENSG00000258634	438.493	1.15895	0.144547	8.01782	1.07641e-15	3.54702e-13
ENSG00000116793	3087.24	0.372675	0.113534	3.28251	0.00102889	0.0227111	PHTF1
ENSG00000197323	3992.94	0.383749	0.0960634	3.99474	6.47642e-05	0.00243882	TRIM33
ENSG00000116815	561.2	0.633585	0.140428	4.51181	6.42756e-06	0.000340833	CD58
ENSG00000143061	2067.83	1.10303	0.108589	10.1578	3.05847e-24	2.48995e-21	IGSF3
ENSG00000116824	4605.77	1.40343	0.105437	13.3106	2.0096e-40	5.56258e-37	CD2
ENSG00000143418	7455.43	0.503754	0.0932453	5.40246	6.57337e-08	6.59243e-06	CERS2
ENSG00000143409	836.93	0.578853	0.172895	3.348	0.00081398	0.0187134	FAM63A
ENSG00000163154	443.077	-0.466801	0.156775	-2.97751	0.00290596	0.0465492	TNFAIP8L2
ENSG00000182134	395.493	-0.463187	0.136092	-3.40347	0.000665358	0.0160708	TDRKH
ENSG00000203783	62.5184	5.57954	1.37308	4.06354	4.8335e-05	0.00188971	PRR9
ENSG00000143614	2483.35	0.463446	0.115516	4.01197	6.02142e-05	0.00228319	GATAD2B
ENSG00000160712	60.7916	1.10797	0.295871	3.74477	0.00018056	0.00559051	IL6R
ENSG00000116539	2169.12	0.407286	0.110005	3.70242	0.000213552	0.00643914	ASH1L
ENSG00000117036	1149.7	0.412886	0.117907	3.5018	0.000462126	0.0118881	ETV3
ENSG00000162739	2635.71	-0.808032	0.172948	-4.67212	2.9811e-06	0.000181755	SLAMF6
ENSG00000117091	462.869	-0.630381	0.196189	-3.21312	0.001313	0.0268815	CD48
ENSG00000158793	388.907	-0.443977	0.140644	-3.15676	0.00159535	0.0309672	NIT1
ENSG00000198929	183.144	-1.63018	0.201524	-8.08927	6.00222e-16	2.02612e-13	NOS1AP
ENSG00000239887	493.686	-1.80643	0.206258	-8.75809	1.98591e-18	9.16169e-16	C1orf226
ENSG00000198574	397.973	-1.33544	0.19994	-6.67918	2.40279e-11	4.68375e-09	SH2D1B
ENSG00000143149	3147.23	0.307315	0.101245	3.03537	0.00240245	0.0410492	ALDH9A1
ENSG00000143167	20.1852	2.26123	0.707947	3.19406	0.00140286	0.0280978	GPA33
ENSG00000198842	152.076	1.75504	0.297755	5.89424	3.76399e-09	4.82349e-07	DUSP27
ENSG00000143147	1277.75	1.65488	0.173533	9.53641	1.47862e-21	1.02321e-18	GPR161
ENSG00000143153	695.426	0.741859	0.239727	3.0946	0.00197078	0.0360788	ATP1B1
ENSG00000117523	23792.2	0.373943	0.0867451	4.31082	1.62649e-05	0.000764748	PRRC2C
ENSG00000162783	1408.7	0.386546	0.122803	3.1477	0.00164563	0.0314622	IER5
ENSG00000143333	467.769	1.37197	0.42898	3.19823	0.00138276	0.027816	RGS16
ENSG00000116668	466.951	-0.550781	0.142842	-3.85587	0.000115316	0.00385502	SWT1
ENSG00000116679	10693.4	-0.756236	0.0872999	-8.66251	4.61478e-18	2.06028e-15	IVNS1ABP
ENSG00000073756	157.133	0.72691	0.221076	3.28805	0.00100882	0.0223037	PTGS2
ENSG00000116711	1417.51	-0.334312	0.09908	-3.37416	0.000740406	0.0173095	PLA2G4A
ENSG00000150681	5849.27	0.595814	0.194608	3.06162	0.00220146	0.0385674	RGS18
ENSG00000213047	1449.77	0.62494	0.135272	4.61986	3.83996e-06	0.000221438	DENND1B
ENSG00000118200	93.2908	2.57407	0.353223	7.28738	3.16037e-13	8.41144e-11	CAMSAP2
ENSG00000116852	9019.07	1.14038	0.192333	5.9292	3.04407e-09	4.01238e-07	KIF21B
ENSG00000117139	5102.78	-0.407048	0.117797	-3.45551	0.000549251	0.0137462	KDM5B
ENSG00000159348	928.885	-0.339362	0.109696	-3.09365	0.00197713	0.036131	CYB5R1
ENSG00000133069	1242.54	-0.685157	0.143892	-4.76161	1.92055e-06	0.000131586	TMCC2
ENSG00000158711	2687.05	0.493211	0.100884	4.88888	1.01413e-06	7.31017e-05	ELK4
ENSG00000158715	492.493	0.811917	0.187174	4.33777	1.43936e-05	0.000689299	SLC45A3
ENSG00000196550	479.748	0.4047	0.135479	2.98718	0.00281567	0.0457382	FAM72A
ENSG00000163486	2806.89	0.34814	0.108397	3.21173	0.00131939	0.0269355	SRGAP2
ENSG00000136653	2714.92	0.780714	0.113561	6.87486	6.20497e-12	1.45554e-09	RASSF5
ENSG00000162889	5865.25	0.307821	0.0867904	3.54672	0.000390062	0.0105028	MAPKAPK2
ENSG00000136634	21.5371	7.92514	1.25775	6.30104	2.95652e-10	4.87122e-08	IL10
ENSG00000182795	5172.03	-0.573051	0.182658	-3.13729	0.00170517	0.0323281	C1orf116
ENSG00000076356	141.999	1.00845	0.326768	3.08614	0.00202776	0.0367813	PLXNA2
ENSG00000117724	16853.1	0.462544	0.12913	3.58201	0.000340963	0.00940024	CENPF
ENSG00000143507	676.438	0.773805	0.183487	4.21722	2.47333e-05	0.00108326	DUSP10
ENSG00000143751	3394.06	-0.412488	0.10703	-3.85396	0.000116225	0.00387602	SDE2
ENSG00000203685	95.4364	-0.768555	0.249776	-3.07698	0.00209111	0.0374883	C1orf95
ENSG00000143772	1271.3	0.543728	0.129946	4.18425	2.86113e-05	0.00122595	ITPKB
ENSG00000143776	4854.14	0.385712	0.0909835	4.23936	2.24156e-05	0.000991155	CDC42BPA
ENSG00000231663	79.7096	0.795895	0.26739	2.97653	0.00291527	0.0465905
ENSG00000162711	134.157	0.725322	0.244381	2.96799	0.00299753	0.0476848	NLRP3
ENSG00000015171	3198.62	0.270201	0.0892705	3.02677	0.00247183	0.0418729	ZMYND11
ENSG00000178462	239.302	1.07647	0.203562	5.28815	1.23558e-07	1.15543e-05	TUBAL3
ENSG00000108021	4551.03	0.272083	0.0904976	3.00652	0.00264254	0.0436428	FAM208B
ENSG00000134452	1714.75	-0.356149	0.0986867	-3.60889	0.00030751	0.00865027	FBXO18
ENSG00000181192	679.327	-0.465699	0.157878	-2.94973	0.00318048	0.0496815	DHTKD1
ENSG00000152465	1202.84	-0.455183	0.123354	-3.69005	0.000224212	0.00670215	NMT2
ENSG00000107863	2118.32	0.578167	0.149897	3.85709	0.000114747	0.00384526	ARHGAP21
ENSG00000095787	7645.03	0.270479	0.0868782	3.11332	0.00184997	0.0343672	WAC
ENSG00000095739	349.551	0.818563	0.250365	3.26949	0.00107743	0.0235944	BAMBI
ENSG00000107968	230.702	0.696146	0.187487	3.71304	0.000204787	0.00624286	MAP3K8
ENSG00000099250	293.966	1.24791	0.261795	4.76675	1.87217e-06	0.000129554	NRP1
ENSG00000165406	1484.6	-0.456192	0.144733	-3.15196	0.0016218	0.0313158	2008-03-01
ENSG00000204176	41.4614	2.32943	0.46	5.06397	4.10617e-07	3.2474e-05	SYT15
ENSG00000171988	3145	0.584964	0.107213	5.4561	4.86693e-08	5.06453e-06	JMJD1C
ENSG00000172731	90.5572	-1.37067	0.265551	-5.16163	2.44809e-07	2.1176e-05	LRRC20
ENSG00000108219	6607.77	0.360785	0.0950634	3.79521	0.000147521	0.00472612	TSPAN14
ENSG00000198682	1007.9	1.14769	0.18979	6.04718	1.47402e-09	2.10314e-07	PAPSS2
ENSG00000152782	499.446	1.05459	0.16074	6.56088	5.34925e-11	9.87115e-09	PANK1
ENSG00000138182	2498.82	0.349519	0.0919956	3.79931	0.000145102	0.00467027	KIF20B
ENSG00000180628	2112.68	0.358734	0.0968342	3.70462	0.000211704	0.00639735	PCGF5
ENSG00000095564	2963.88	0.409083	0.104989	3.89645	9.76141e-05	0.00334401	BTAF1
ENSG00000107864	223.718	0.785011	0.217893	3.60273	0.000314888	0.00878638	CPEB3
ENSG00000119977	731.417	-0.359635	0.116318	-3.09182	0.00198935	0.0361795	TCTN3
ENSG00000196233	1343.64	0.518084	0.118702	4.36457	1.27372e-05	0.00062291	LCOR
ENSG00000165886	419.589	0.525428	0.176077	2.98408	0.00284432	0.0459339	UBTD1
ENSG00000107821	66.9897	1.18388	0.388617	3.0464	0.002316	0.040117	KAZALD1
ENSG00000166167	1804.2	0.39919	0.131154	3.04367	0.00233712	0.0403313	BTRC
ENSG00000166272	1984.82	0.387134	0.0913692	4.23703	2.26498e-05	0.000998322	WBP1L
ENSG00000151553	745.35	0.595632	0.140272	4.24627	2.17357e-05	0.000967274	FAM160B1
ENSG00000151893	2386.8	0.384447	0.101245	3.79719	0.000146345	0.00469935	CACUL1
ENSG00000198873	58.454	2.19628	0.48555	4.5233	6.08837e-06	0.000327872	GRK5
ENSG00000198825	547.382	0.475904	0.156162	3.0475	0.00230756	0.0400208	INPP5F
ENSG00000176171	278.181	-0.845631	0.180507	-4.68475	2.80299e-06	0.000173185	BNIP3
ENSG00000110665	2203.77	-0.548464	0.0998919	-5.49057	4.00636e-08	4.23267e-06	C11orf21
ENSG00000269821	626.193	0.983192	0.180865	5.43605	5.4476e-08	5.62648e-06	KCNQ1OT1
ENSG00000129757	39.5922	1.97821	0.37904	5.219	1.79896e-07	1.6063e-05	CDKN1C
ENSG00000260629	78.1059	-0.937686	0.269166	-3.48367	0.000494585	0.0126293
ENSG00000121236	1505.24	-0.879265	0.113341	-7.75772	8.64717e-15	2.65948e-12	TRIM6
ENSG00000132256	2186.15	-0.572005	0.164908	-3.46862	0.000523131	0.0131639	TRIM5
ENSG00000132254	709.374	0.334591	0.111873	2.99081	0.00278239	0.0454644	ARFIP2
ENSG00000166333	4968.52	-0.343649	0.0876614	-3.92018	8.84818e-05	0.0031403	ILK
ENSG00000184014	1773.46	0.446628	0.127283	3.50893	0.000449914	0.0116483	DENND5A
ENSG00000133789	2737.78	0.317317	0.100325	3.16289	0.00156212	0.0306137	SWAP70
ENSG00000133805	1355.02	1.95335	0.390545	5.0016	5.68557e-07	4.32353e-05	AMPD3
ENSG00000198730	5310.97	1.11627	0.131534	8.48654	2.12879e-17	8.72202e-15	CTR9
ENSG00000133816	491.357	0.599457	0.185428	3.23283	0.00122568	0.025791	MICAL2
ENSG00000166689	885.096	0.714977	0.224452	3.18544	0.00144536	0.0286177	PLEKHA7
ENSG00000109881	1845.86	-0.564988	0.138219	-4.08763	4.358e-05	0.0017432	CCDC34
ENSG00000205213	2021.94	-1.04275	0.16621	-6.27369	3.52587e-10	5.60897e-08	LGR4
ENSG00000060749	3350.94	0.387098	0.0987764	3.91893	8.89439e-05	0.00314829	QSER1
ENSG00000110422	2698.63	0.310362	0.0967938	3.20643	0.00134394	0.0272729	HIPK3
ENSG00000026508	6089.28	0.780318	0.191392	4.07708	4.56055e-05	0.00179823	CD44
ENSG00000085117	3646.97	0.507646	0.143683	3.53309	0.00041073	0.0108899	CD82
ENSG00000157570	623.35	0.747794	0.244116	3.06327	0.00218934	0.0385615	TSPAN18
ENSG00000166900	1462.08	-0.361889	0.106584	-3.39534	0.000685439	0.0164116	STX3
ENSG00000149516	15804.6	-0.417741	0.125545	-3.32744	0.000876493	0.019919	MS4A3
ENSG00000124942	100.446	0.944794	0.300841	3.14051	0.00168654	0.0321069	AHNAK
ENSG00000168569	779.32	0.524018	0.131325	3.99023	6.6009e-05	0.00246909	TMEM223
ENSG00000168003	4178.31	0.379683	0.0974328	3.89687	9.7442e-05	0.00334401	SLC3A2
ENSG00000068831	2912.32	0.6836	0.138745	4.92704	8.34852e-07	6.14593e-05	RASGRP2
ENSG00000110047	1885.23	0.435519	0.139971	3.11148	0.00186151	0.0345352	EHD1
ENSG00000014138	1473.12	-0.373028	0.112192	-3.32491	0.000884465	0.0200672	POLA2
ENSG00000149798	136.577	-0.948173	0.244317	-3.88091	0.000104065	0.00352141	CDC42EP2
ENSG00000251562	3951.11	0.583803	0.189637	3.07853	0.00208023	0.0374528	MALAT1
ENSG00000254470	602.849	0.494392	0.165869	2.98062	0.00287662	0.0462277	AP5B1
ENSG00000174669	1570.3	-0.415985	0.117058	-3.55367	0.000379891	0.0102659	SLC29A2
ENSG00000172932	1749.17	0.440305	0.139291	3.16104	0.00157209	0.0306446	ANKRD13D
ENSG00000167797	1539.42	-0.469175	0.103778	-4.52094	6.15669e-06	0.000330266	CDK2AP2
ENSG00000110721	2530.93	0.540422	0.0997023	5.42036	5.94798e-08	6.05185e-06	CHKA
ENSG00000162337	1352.98	0.626718	0.158413	3.95624	7.61402e-05	0.00277103	LRP5
ENSG00000110075	10618.1	0.344559	0.0911656	3.77949	0.000157152	0.00497062	PPP6R3
ENSG00000132749	874.401	-0.457917	0.13277	-3.44895	0.000562776	0.0140087	MTL5
ENSG00000149716	727.489	0.374715	0.115345	3.24866	0.00115951	0.0247871	ORAOV1
ENSG00000085733	302.964	0.952631	0.203874	4.67265	2.97335e-06	0.000181755	CTTN
ENSG00000158483	222.622	-0.558581	0.160569	-3.47876	0.000503732	0.012792	FAM86C1
ENSG00000165458	6734.16	0.619931	0.185518	3.34162	0.000832901	0.019085	INPPL1
ENSG00000137478	5701.23	1.16334	0.129515	8.98232	2.65116e-19	1.46768e-16	FCHSD2
ENSG00000175567	3462.7	-0.606113	0.149412	-4.05666	4.97785e-05	0.00194066	UCP2
ENSG00000062282	500.605	-0.587152	0.132713	-4.42424	9.67845e-06	0.000492462	DGAT2
ENSG00000085741	203.879	1.12262	0.240349	4.67077	3.00066e-06	0.000182145	WNT11
ENSG00000137507	867.637	2.46035	0.224474	10.9605	5.91771e-28	7.44555e-25	LRRC32
ENSG00000078124	2080.59	0.454442	0.114295	3.97605	7.00705e-05	0.00259298	ACER3
ENSG00000149269	1398.54	-0.416248	0.103486	-4.02225	5.76446e-05	0.00220582	PAK1
ENSG00000137504	4174.59	0.320688	0.103174	3.10823	0.0018821	0.0347817	CREBZF
ENSG00000166025	5974.04	0.508376	0.123727	4.10884	3.97654e-05	0.00161394	AMOTL1
ENSG00000149218	2005.52	-1.06594	0.158009	-6.74607	1.51907e-11	3.1379e-09	ENDOD1
ENSG00000149212	6383.53	-0.612463	0.161417	-3.7943	0.000148061	0.00473249	SESN3
ENSG00000110330	2667.35	0.566846	0.120758	4.69406	2.67839e-06	0.000168156	BIRC2
ENSG00000110660	4294.67	0.33132	0.102555	3.23064	0.00123515	0.0258224	SLC35F2
ENSG00000186174	1284.44	1.10837	0.184043	6.02234	1.7191e-09	2.39487e-07	BCL9L
ENSG00000110395	4021.9	0.73354	0.152936	4.79638	1.61561e-06	0.00011293	CBL
ENSG00000196914	8314.44	0.587994	0.0967572	6.07701	1.22448e-09	1.78387e-07	ARHGEF12
ENSG00000109971	105711	-0.571361	0.137378	-4.15906	3.19566e-05	0.00133619	HSPA8
ENSG00000004478	5173.04	-0.407239	0.129746	-3.13875	0.0016967	0.0322117	FKBP4
ENSG00000111652	1386.23	-0.320269	0.103102	-3.10633	0.00189426	0.0349088	COPS7A
ENSG00000065970	1346.05	0.49721	0.134787	3.68887	0.000225254	0.00671878	FOXJ2
ENSG00000139187	1546.25	-0.519745	0.106061	-4.90044	9.56244e-07	6.96548e-05	KLRG1
ENSG00000060140	49.1138	1.80006	0.437443	4.11495	3.87264e-05	0.00158572	STYK1
ENSG00000172572	465.375	-0.646876	0.169497	-3.81643	0.000135395	0.00439873	PDE3A
ENSG00000111726	5147.31	-0.349928	0.0936778	-3.73544	0.000187386	0.005776	CMAS
ENSG00000133703	3413.86	0.320863	0.0911461	3.52031	0.000431035	0.0112134	KRAS
ENSG00000174718	4607.46	0.726058	0.135159	5.37187	7.7925e-08	7.6488e-06	KIAA1551
ENSG00000139174	1608.02	-0.931103	0.210627	-4.42063	9.84125e-06	0.000498912	PRICKLE1
ENSG00000189079	3756.69	0.478164	0.10759	4.44433	8.81645e-06	0.000453605	ARID2
ENSG00000139218	7469.32	0.255059	0.0831154	3.06873	0.00214968	0.0381387	SCAF11
ENSG00000111371	1102.64	0.501616	0.151082	3.32015	0.000899701	0.0202872	SLC38A1
ENSG00000079337	265.765	0.713884	0.196249	3.63764	0.00027515	0.00788421	RAPGEF3
ENSG00000211584	1618.09	-0.616966	0.170617	-3.61609	0.000299088	0.00844771	SLC48A1
ENSG00000111424	580.101	3.15362	0.47332	6.66276	2.68736e-11	5.09493e-09	VDR
ENSG00000167528	685.849	0.587225	0.181737	3.23118	0.00123281	0.0258125	ZNF641
ENSG00000167548	9070.69	0.384	0.115862	3.31428	0.000918778	0.0206092	KMT2D
ENSG00000161791	2683.06	1.28067	0.188763	6.78454	1.16455e-11	2.59959e-09	FMNL3
ENSG00000170374	136.756	2.19092	0.245042	8.941	3.85656e-19	2.05288e-16	SP7
ENSG00000123405	11955.3	-0.557918	0.102005	-5.46952	4.51256e-08	4.73135e-06	NFE2
ENSG00000161638	4205.7	0.81106	0.186739	4.34329	1.40366e-05	0.000676888	ITGA5
ENSG00000139531	655.316	-0.456528	0.129315	-3.53036	0.00041499	0.0109399	SUOX
ENSG00000111110	1961.8	-0.634684	0.114863	-5.52557	3.28416e-08	3.55099e-06	PPM1H
ENSG00000153179	1984.37	0.503871	0.156942	3.21055	0.00132482	0.0269544	RASSF3
ENSG00000174106	2032.8	0.303515	0.0943307	3.21756	0.00129287	0.0267063	LEMD3
ENSG00000111605	8418.32	0.466059	0.10348	4.50385	6.67349e-06	0.000352523	CPSF6
ENSG00000127329	26.8455	1.82179	0.592674	3.07385	0.00211313	0.0376393	PTPRB
ENSG00000091039	15964.7	0.969191	0.141151	6.86633	6.58767e-12	1.51956e-09	OSBPL8
ENSG00000111145	2612.53	0.60242	0.13329	4.51962	6.19517e-06	0.000331047	ELK3
ENSG00000059758	2606	0.8803	0.104409	8.43124	3.42014e-17	1.35242e-14	CDK17
ENSG00000198431	9453.55	0.336232	0.0851749	3.94755	7.89549e-05	0.00284567	TXNRD1
ENSG00000136051	4190.84	0.75883	0.114569	6.62333	3.51202e-11	6.56842e-09	KIAA1033
ENSG00000120832	1104.97	0.340124	0.107615	3.16057	0.00157461	0.0306507	MTERFD3
ENSG00000110876	5861.46	-0.408897	0.0926236	-4.41461	1.01194e-05	0.000508762	SELPLG
ENSG00000110921	569.771	-0.583357	0.157393	-3.70636	0.000210258	0.00636756	MVK
ENSG00000123066	6045.39	0.408861	0.103839	3.93746	8.23476e-05	0.00296024	MED13L
ENSG00000089094	3407.92	0.344452	0.10156	3.39163	0.000694785	0.016579	KDM2B
ENSG00000139725	1947.79	0.484281	0.157315	3.07842	0.00208101	0.0374528	RHOF
ENSG00000130787	58.0262	1.66719	0.435835	3.82527	0.000130628	0.00429429	HIP1R
ENSG00000196498	6978.21	0.561771	0.147111	3.81869	0.000134161	0.00438213	NCOR2
ENSG00000150991	5380.65	-0.624945	0.119794	-5.21684	1.82002e-07	1.61468e-05	UBC
ENSG00000183495	6582.53	0.409256	0.114504	3.57415	0.000351372	0.00961065	EP400
ENSG00000165474	18.7483	2.03161	0.631865	3.21526	0.00130325	0.0268009	GJB2
ENSG00000151835	4022.97	0.307022	0.0905541	3.39048	0.000697691	0.0166087	SACS
ENSG00000151849	928.689	0.38293	0.117766	3.25163	0.00114746	0.0246216	CENPJ
ENSG00000139517	667.594	0.476539	0.132846	3.58717	0.000334291	0.0092347	LNX2
ENSG00000152520	1494.29	0.479833	0.131386	3.65208	0.000260124	0.00753163	PAN3
ENSG00000133103	662.845	-0.428636	0.116866	-3.66777	0.00024468	0.00715934	COG6
ENSG00000120690	5180.45	0.378753	0.108021	3.50629	0.000454397	0.0117111	ELF1
ENSG00000102780	752.884	0.693649	0.152198	4.55754	5.17573e-06	0.000285387	DGKH
ENSG00000102804	4660.84	0.571348	0.15665	3.6473	0.000265013	0.00762533	TSC22D1
ENSG00000136141	578.441	0.641134	0.153213	4.18459	2.85683e-05	0.00122595	LRCH1
ENSG00000139679	387.11	0.554746	0.172585	3.21434	0.00130746	0.0268475	LPAR6
ENSG00000139668	1631.57	-0.32205	0.106622	-3.02048	0.00252375	0.0422866	WDFY2
ENSG00000123191	2697.3	-0.450944	0.148342	-3.03989	0.00236661	0.0406535	ATP7B
ENSG00000136153	3585.94	2.44443	0.508679	4.80545	1.54407e-06	0.000108477	LMO7
ENSG00000152193	8040.86	-0.392775	0.131782	-2.98048	0.00287796	0.0462277	RNF219
ENSG00000102471	34.2021	1.74179	0.48492	3.59192	0.000328256	0.00910433	NDFIP2
ENSG00000139793	1147.49	0.645611	0.136963	4.71376	2.43188e-06	0.000156821	MBNL2
ENSG00000102572	14384.9	0.305988	0.103583	2.95402	0.00313663	0.0493306	STK24
ENSG00000102524	727.482	-0.568867	0.172012	-3.30714	0.000942527	0.0210058	TNFSF13B
ENSG00000088448	4711.57	0.286846	0.0962411	2.98049	0.00287789	0.0462277	ANKRD10
ENSG00000185989	6236.39	1.23652	0.117281	10.5432	5.46231e-26	5.81526e-23	RASA3
ENSG00000136319	1604.98	-0.370526	0.10502	-3.52816	0.000418466	0.0109689	TTC5
ENSG00000258441	912.359	0.603544	0.123894	4.87144	1.10788e-06	7.94462e-05	LINC00641
ENSG00000157227	187.019	1.48593	0.330117	4.5012	6.75697e-06	0.000355576	MMP14
ENSG00000100804	2760.12	-0.308314	0.104409	-2.95295	0.00314752	0.0493896	PSMB5
ENSG00000213903	239.08	0.679876	0.201158	3.37981	0.000725358	0.0170731	LTB4R
ENSG00000092148	6844.63	0.327609	0.0858057	3.81803	0.000134523	0.00438213	HECTD1
ENSG00000198604	4942.13	0.445502	0.11893	3.74591	0.000179738	0.00557753	BAZ1A
ENSG00000129534	4183.11	0.333471	0.10923	3.05292	0.00226626	0.0396182	MIS18BP1
ENSG00000258486	33.7137	-1.78581	0.4552	-3.92314	8.74006e-05	0.00312565	RN7SL1
ENSG00000265150	84.0704	-1.60268	0.338681	-4.73211	2.22196e-06	0.000147846	RN7SL2
ENSG00000100485	1550.86	0.480715	0.139424	3.44788	0.000565009	0.014039	SOS2
ENSG00000100523	951.287	0.532455	0.125361	4.24738	2.16286e-05	0.000965611	DDHD1
ENSG00000180008	1925.87	0.425218	0.108886	3.90518	9.4156e-05	0.00327417	SOCS4
ENSG00000257621	1140.34	0.351289	0.102211	3.43691	0.000588383	0.0145155
ENSG00000081181	811.968	-0.570973	0.181034	-3.15396	0.00161074	0.0312221	ARG2
ENSG00000185650	3200.4	0.434373	0.11162	3.89151	9.96205e-05	0.00338759	ZFP36L1
ENSG00000100678	92.6403	0.956171	0.30236	3.16236	0.00156497	0.0306137	SLC8A3
ENSG00000156030	3702.94	0.383763	0.102794	3.73331	0.000188976	0.00579918	ELMSAN1
ENSG00000119608	35.6524	2.0657	0.44704	4.62084	3.82197e-06	0.000221322	PROX2
ENSG00000151445	823.238	-0.392606	0.11043	-3.55526	0.000377603	0.0102271	VIPAS39
ENSG00000185070	221.537	-1.36828	0.288314	-4.74578	2.07709e-06	0.000139958	FLRT2
ENSG00000011114	1579.93	0.359063	0.10036	3.57774	0.000346574	0.00951703	BTBD7
ENSG00000197119	572.352	-0.405769	0.13184	-3.07774	0.00208576	0.0374883	SLC25A29
ENSG00000197102	5772.98	0.549923	0.131572	4.17963	2.91989e-05	0.00124726	DYNC1H1
ENSG00000156381	318.409	-0.843587	0.165617	-5.0936	3.51323e-07	2.82693e-05	ANKRD9
ENSG00000183484	81.1746	1.61953	0.394692	4.10328	4.07333e-05	0.00164358	GPR132
ENSG00000184916	84.3911	4.28852	1.06654	4.02098	5.7957e-05	0.00220971	JAG2
ENSG00000183828	324.76	0.924879	0.23744	3.89521	9.81148e-05	0.00335286	NUDT14
ENSG00000187951	474.048	0.481581	0.145475	3.31042	0.000931575	0.0208014	ARHGAP11B
ENSG00000169926	1930.82	0.60756	0.102578	5.92288	3.16354e-09	4.1305e-07	KLF13
ENSG00000198826	3653.5	0.325567	0.105246	3.09339	0.00197885	0.036131	ARHGAP11A
ENSG00000261559	223.615	1.01423	0.199901	5.07365	3.90259e-07	3.12207e-05
ENSG00000166068	633.895	0.545033	0.17576	3.10101	0.00192859	0.0354001	SPRED1
ENSG00000150667	44.1867	1.63592	0.35321	4.63157	3.62907e-06	0.000213675	FSIP1
ENSG00000261136	137.644	1.86929	0.280009	6.67583	2.45844e-11	4.72568e-09
ENSG00000259330	491.675	0.691993	0.187074	3.69903	0.000216427	0.00651163	LINC00984
ENSG00000137869	27.82	2.44467	0.541505	4.51458	6.3441e-06	0.000337702	CYP19A1
ENSG00000140280	325.584	0.483609	0.156372	3.09267	0.00198364	0.0361707	LYSMD2
ENSG00000103657	6357.72	0.347588	0.106038	3.27796	0.00104558	0.0230062	HERC1
ENSG00000166949	3428.53	0.426403	0.138846	3.07105	0.00213306	0.0379454	SMAD3
ENSG00000198794	264.751	-0.496721	0.15466	-3.2117	0.00131953	0.0269355	SCAMP5
ENSG00000169330	128.276	0.987197	0.212031	4.65591	3.22547e-06	0.000194089	KIAA1024
ENSG00000156206	384.042	0.698013	0.192274	3.63031	0.000283084	0.00807811	C15orf26
ENSG00000172349	742.83	0.446185	0.126359	3.53108	0.000413859	0.0109309	IL16
ENSG00000182511	1250.34	-0.352732	0.114731	-3.07443	0.00210907	0.0376227	FES
ENSG00000184508	885.115	-0.536723	0.131362	-4.08584	4.39181e-05	0.00174663	HDDC3
ENSG00000173575	4614.41	0.329324	0.108576	3.03312	0.00242041	0.0412543	CHD2
ENSG00000068305	4520.29	0.83952	0.138923	6.04308	1.512e-09	2.13532e-07	MEF2A
ENSG00000154237	769.608	0.454368	0.117981	3.85121	0.000117537	0.00391036	LRRK1
ENSG00000131873	3426.07	0.401368	0.118815	3.37809	0.000729905	0.0171509	CHSY1
ENSG00000198736	537.191	-0.648578	0.14014	-4.62808	3.69066e-06	0.000215522	MSRB1
ENSG00000184207	844.212	-0.436705	0.124028	-3.52103	0.00042988	0.0112044	PGP
ENSG00000167977	1904.98	0.404921	0.117209	3.45469	0.000550928	0.0137632	KCTD5
ENSG00000167984	3919.71	1.82385	0.169873	10.7366	6.85481e-27	7.90588e-24	NLRC3
ENSG00000188827	927.812	0.490381	0.155629	3.15097	0.00162727	0.0313158	SLX4
ENSG00000005339	4567.04	0.348789	0.113879	3.0628	0.00219276	0.0385615	CREBBP
ENSG00000118894	440.049	-0.462801	0.141365	-3.2738	0.00106111	0.0232737	FAM86A
ENSG00000187555	11165.4	1.06923	0.102163	10.4659	1.23852e-25	1.14274e-22	USP7
ENSG00000166669	502.344	0.575377	0.134276	4.28502	1.82724e-05	0.000837383	ATF7IP2
ENSG00000085721	3335.19	0.524557	0.0953465	5.50159	3.76389e-08	4.03816e-06	RRN3
ENSG00000188599	128.967	0.666118	0.21266	3.13231	0.00173436	0.0327917	NPIPP1
ENSG00000250251	148.928	0.645655	0.21347	3.02457	0.00248987	0.0420242	PKD1P6
ENSG00000157106	5360.32	0.271186	0.0834828	3.2484	0.00116055	0.0247871	SMG1
ENSG00000066654	2788.56	0.291519	0.0987514	2.95205	0.0031567	0.0494776	THUMPD1
ENSG00000103319	1180.18	-0.439296	0.106959	-4.10713	4.00611e-05	0.00162119	EEF2K
ENSG00000103365	4090.58	0.453268	0.108652	4.17174	3.02282e-05	0.00128331	GGA2
ENSG00000122257	4403.88	0.351957	0.0984134	3.57631	0.00034848	0.00955043	RBBP6
ENSG00000090905	3515.97	0.481398	0.0967927	4.97349	6.57573e-07	4.94609e-05	TNRC6A
ENSG00000103502	997.473	-0.342305	0.1127	-3.03732	0.00238689	0.0408795	CDIPT
ENSG00000140807	781.719	6.08978	0.47287	12.8784	5.95896e-38	1.37453e-34	NKD1
ENSG00000261685	21.7629	3.51218	0.672515	5.22246	1.76561e-07	1.58676e-05
ENSG00000177200	3414.6	0.319149	0.0940089	3.39488	0.000686583	0.0164116	CHD9
ENSG00000087253	909.882	0.720862	0.203833	3.53654	0.000405407	0.0108088	LPCAT2
ENSG00000140853	1721.89	-0.351892	0.107745	-3.26597	0.0010909	0.0238516	NLRC5
ENSG00000125170	966.29	1.62639	0.159961	10.1674	2.77172e-24	2.39754e-21	DOK4
ENSG00000135736	78.4484	1.07057	0.35434	3.02132	0.00251678	0.0422208	CCDC102A
ENSG00000205336	328.605	1.12458	0.160896	6.98948	2.75909e-12	6.58377e-10	GPR56
ENSG00000140859	214.716	1.74097	0.245228	7.0994	1.25301e-12	3.0424e-10	KIFC3
ENSG00000140931	631.19	0.383793	0.116094	3.30588	0.000946771	0.0210326	CMTM3
ENSG00000067955	4890.95	0.599819	0.0988912	6.06545	1.31588e-09	1.89706e-07	CBFB
ENSG00000205250	4127.62	0.340375	0.0944109	3.60525	0.000311847	0.00872089	E2F4
ENSG00000135723	6308.15	0.807574	0.18281	4.41757	9.9818e-06	0.00050419	FHOD1
ENSG00000159792	1088.76	-0.422787	0.106878	-3.95579	7.62834e-05	0.00277103	PSKH1
ENSG00000102908	1818.53	0.368923	0.120258	3.06775	0.00215673	0.0381703	NFAT5
ENSG00000157350	2996.31	-0.409029	0.0954745	-4.28417	1.83425e-05	0.000837792	ST3GAL2
ENSG00000102984	170.765	0.995028	0.20949	4.74976	2.03656e-06	0.000138167	ZNF821
ENSG00000153815	3386.89	0.482048	0.109208	4.41404	1.01458e-05	0.000508762	CMIP
ENSG00000140948	848.347	0.522796	0.154566	3.38235	0.000718687	0.0170028	ZCCHC14
ENSG00000205047	212.146	0.588592	0.177776	3.31087	0.000930067	0.0208014
ENSG00000103257	11267.9	0.8229	0.0910336	9.03952	1.57362e-19	9.07456e-17	SLC7A5
ENSG00000225614	83.579	1.22676	0.259545	4.72656	2.2835e-06	0.000150493	ZNF469
ENSG00000158717	2033.04	0.780012	0.187085	4.16929	3.05546e-05	0.00128925	RNF166
ENSG00000167522	6563.32	0.491829	0.0933964	5.26604	1.39398e-07	1.29481e-05	ANKRD11
ENSG00000158805	1222.7	0.479641	0.14267	3.36189	0.000774097	0.0179156	ZNF276
ENSG00000197879	1011.13	0.697518	0.142103	4.90855	9.17538e-07	6.7189e-05	MYO1C
ENSG00000007168	4485.76	0.296484	0.0853063	3.47553	0.000509853	0.0129237	PAFAH1B1
ENSG00000083454	202.576	0.900877	0.238237	3.78143	0.000155929	0.00496106	P2RX5
ENSG00000108528	1328.53	-0.372081	0.10606	-3.50822	0.00045112	0.0116483	SLC25A11
ENSG00000108523	1645.42	-0.293308	0.0969546	-3.02521	0.00248457	0.0419858	RNF167
ENSG00000180626	172.09	0.581155	0.193469	3.00386	0.00266576	0.0439215	ZNF594
ENSG00000091592	1133.92	0.657704	0.177432	3.70679	0.000209905	0.00636756	NLRP1
ENSG00000132530	33.0546	1.28218	0.420151	3.05172	0.00227536	0.0396612	XAF1
ENSG00000174282	994.216	0.395279	0.133942	2.95112	0.0031662	0.0495144	ZBTB4
ENSG00000262251	155.695	1.03027	0.200461	5.1395	2.75464e-07	2.33288e-05
ENSG00000273290	692.979	0.363874	0.112564	3.23261	0.00122666	0.025791
ENSG00000170425	1562.93	-0.676353	0.148602	-4.55143	5.32836e-06	0.00029148	ADORA2B
ENSG00000181350	22.0578	3.52708	0.603803	5.84145	5.17482e-09	6.3946e-07	FAM211A
ENSG00000179598	1102.58	-0.484726	0.128896	-3.76059	0.00016951	0.00528382	PLD6
ENSG00000108557	2135.11	0.484102	0.123302	3.92614	8.63201e-05	0.003095	RAI1
ENSG00000176974	670.673	-0.423088	0.127306	-3.3234	0.000889281	0.0201435	SHMT1
ENSG00000154016	596.447	0.511184	0.138852	3.6815	0.000231862	0.00684217	GRAP
ENSG00000128487	552.607	-0.634098	0.125114	-5.06815	4.01692e-07	3.19507e-05	SPECC1
ENSG00000109046	5877.9	0.425464	0.140922	3.01914	0.00253497	0.0424232	WSB1
ENSG00000160606	85.4419	-0.8796	0.26806	-3.28136	0.00103308	0.0227673	TLCD1
ENSG00000076604	1787.8	-0.524911	0.122472	-4.28597	1.81945e-05	0.000837383	TRAF4
ENSG00000167536	731.668	-0.651106	0.117106	-5.55997	2.69819e-08	3.03601e-06	DHRS13
ENSG00000092871	1225.36	0.889288	0.117717	7.55446	4.20611e-14	1.21276e-11	RFFL
ENSG00000172716	2071.55	-0.351313	0.0992149	-3.54093	0.000398718	0.0106736	SLFN11
ENSG00000185128	19.145	2.59568	0.585021	4.4369	9.12629e-06	0.000466081	TBC1D3F
ENSG00000264198	922.825	0.455683	0.110505	4.12364	3.72928e-05	0.00153155
ENSG00000161405	332.005	0.446065	0.138003	3.23228	0.00122806	0.025791	IKZF3
ENSG00000126353	42.6792	5.71025	0.723252	7.89524	2.89761e-15	9.32626e-13	CCR7
ENSG00000068137	180.436	-0.699325	0.190412	-3.67269	0.000240008	0.00705247	PLEKHH3
ENSG00000183978	892.807	-0.353116	0.117177	-3.01351	0.00258243	0.0428546	COA3
ENSG00000091947	923.226	-0.345658	0.114822	-3.01039	0.0026091	0.0431421	TMEM101
ENSG00000180336	1285.45	-0.463476	0.147629	-3.13947	0.00169255	0.032177	C17orf104
ENSG00000159314	1896.88	0.537809	0.134639	3.99444	6.48472e-05	0.00243882	ARHGAP27
ENSG00000108379	111.758	1.33363	0.284086	4.69446	2.67315e-06	0.000168156	WNT3
ENSG00000198933	1636.63	0.462622	0.130034	3.55771	0.000374101	0.0101521	TBKBP1
ENSG00000167182	1004.18	0.442198	0.128939	3.4295	0.000604692	0.0148385	SP2
ENSG00000108439	957.89	-0.348451	0.110208	-3.16174	0.00156829	0.0306137	PNPO
ENSG00000121104	5195.48	-0.811798	0.157924	-5.14042	2.74128e-07	2.33288e-05	FAM117A
ENSG00000136444	2510.24	-0.407157	0.0938467	-4.33853	1.43439e-05	0.000689299	RSAD1
ENSG00000108848	7993.69	0.290448	0.0906613	3.20366	0.00135691	0.0274959	LUC7L3
ENSG00000108960	1170.79	0.721093	0.190535	3.78457	0.000153976	0.00491021	MMD
ENSG00000264112	368.965	0.900795	0.193598	4.65292	3.27268e-06	0.000196077
ENSG00000005379	899.336	0.826753	0.202709	4.07852	4.53235e-05	0.00179222	BZRAP1
ENSG00000108375	21.5424	1.62231	0.484893	3.34571	0.000820707	0.0188368	RNF43
ENSG00000108389	2361.59	-0.565946	0.0960148	-5.89436	3.76135e-09	4.82349e-07	MTMR4
ENSG00000008283	749.591	1.45091	0.234338	6.19151	5.95916e-10	9.26683e-08	CYB561
ENSG00000007312	243.749	-0.643879	0.178316	-3.61089	0.000305144	0.00860122	CD79B
ENSG00000178607	776.659	1.33358	0.17255	7.72864	1.08699e-14	3.27044e-12	ERN1
ENSG00000256525	592.206	0.429242	0.126021	3.4061	0.000658969	0.0159443	POLG2
ENSG00000108654	20588.4	0.689235	0.102029	6.75528	1.42556e-11	2.98936e-09	DDX5
ENSG00000108854	2272.49	2.11587	0.138065	15.3252	5.19302e-53	3.59357e-49	SMURF2
ENSG00000265982	35.9009	1.62062	0.442749	3.66036	0.000251863	0.00730772
ENSG00000214176	433.727	0.818497	0.215364	3.80052	0.000144391	0.0046582	PLEKHM1P
ENSG00000171634	7422.72	0.326187	0.0938955	3.47394	0.000512884	0.0129653	BPTF
ENSG00000237854	121.833	0.858931	0.282417	3.04136	0.00235515	0.0405414	LINC00674
ENSG00000172794	2066.85	-0.43797	0.129382	-3.38508	0.00071157	0.0168632	RAB37
ENSG00000170190	308.314	0.985398	0.26366	3.73739	0.000185943	0.00574432	SLC16A5
ENSG00000182173	2013.39	0.350456	0.105153	3.33281	0.000859728	0.0196024	TSEN54
ENSG00000184640	4097.76	0.35827	0.113821	3.14766	0.00164586	0.0314622	2009-09-01
ENSG00000173894	2991.79	-0.337164	0.113688	-2.9657	0.00301995	0.0479314	CBX2
ENSG00000167291	36.0448	1.63658	0.453557	3.60832	0.000308189	0.00865178	TBC1D16
ENSG00000141577	1452.46	-0.433783	0.145329	-2.98483	0.00283733	0.0458747	AZI1
ENSG00000262877	76.9058	0.910123	0.282651	3.21995	0.00128212	0.0265637
ENSG00000185504	1237.22	-0.524923	0.114786	-4.57305	4.80682e-06	0.000270432	C17orf70
ENSG00000262814	773.85	-0.447548	0.142062	-3.15037	0.00163062	0.0313158	MRPL12
ENSG00000185813	1321.38	-0.517479	0.118631	-4.36207	1.28836e-05	0.00062785	PCYT2
ENSG00000260563	216.125	0.692297	0.221723	3.12235	0.00179411	0.0336457
ENSG00000141562	2861.8	0.877935	0.171943	5.10596	3.29117e-07	2.72753e-05	NARF
ENSG00000154845	3469.95	0.281481	0.0947846	2.96969	0.00298102	0.0475315	PPP4R1
ENSG00000141380	5292.62	0.365885	0.10182	3.59345	0.000326327	0.00907115	SS18
ENSG00000153391	1828.98	-0.41189	0.114624	-3.59339	0.000326404	0.00907115	INO80C
ENSG00000078043	2196.46	0.401376	0.0917864	4.37294	1.22587e-05	0.000601632	PIAS2
ENSG00000101665	353.379	2.32066	0.500392	4.63768	3.52337e-06	0.000208391	SMAD7
ENSG00000172175	909.875	1.32707	0.150919	8.79326	1.4528e-18	7.18097e-16	MALT1
ENSG00000267010	41.586	1.31635	0.371723	3.54121	0.000398299	0.0106736
ENSG00000141682	3883.14	1.06016	0.157648	6.72484	1.75791e-11	3.47565e-09	PMAIP1
ENSG00000150637	857.109	-0.82522	0.179296	-4.60256	4.17335e-06	0.000237692	CD226
ENSG00000215421	971.797	0.460449	0.109524	4.20408	2.62146e-05	0.00114091	ZNF407
ENSG00000197971	267.906	1.05374	0.257897	4.08589	4.39076e-05	0.00174663	MBP
ENSG00000131196	862.569	0.804406	0.185729	4.33106	1.4839e-05	0.000705746	NFATC1
ENSG00000133275	3585.27	0.330535	0.111837	2.95551	0.00312152	0.0491489	CSNK1G2
ENSG00000099875	1522.47	-0.298578	0.0987859	-3.02248	0.00250715	0.0421104	MKNK2
ENSG00000186111	2710.89	0.938798	0.170788	5.49688	3.8658e-08	4.11559e-06	PIP5K1C
ENSG00000141985	1646.42	0.396504	0.132791	2.98593	0.00282714	0.0458117	SH3GL1
ENSG00000185361	2806.04	1.20449	0.146431	8.22567	1.94105e-16	7.06952e-14	TNFAIP8L1
ENSG00000130254	2894.82	0.306041	0.100338	3.05011	0.00228756	0.0397737	SAFB2
ENSG00000087903	376.105	1.57183	0.249719	6.2944	3.0859e-10	4.96614e-08	RFX2
ENSG00000267427	3508.09	0.50344	0.131264	3.83532	0.0001254	0.00416196
ENSG00000130382	2830.35	0.456433	0.134163	3.40207	0.000668769	0.016125	MLLT1
ENSG00000141968	2031.38	0.59013	0.158713	3.71821	0.000200641	0.00612996	VAV1
ENSG00000099785	1508.74	-0.437171	0.10185	-4.29229	1.76837e-05	0.000818537	2002-03-01
ENSG00000142303	60.0834	2.21548	0.485471	4.56357	5.02906e-06	0.000280654	ADAMTS10
ENSG00000197961	1384.26	0.435565	0.137711	3.16289	0.00156212	0.0306137	ZNF121
ENSG00000105088	64.7279	1.56018	0.478619	3.25975	0.00111511	0.0241897	OLFM2
ENSG00000244165	213.591	0.653505	0.168018	3.88949	0.000100457	0.00340766	P2RY11
ENSG00000105376	482.585	-0.506917	0.16461	-3.07951	0.00207342	0.0374135	ICAM5
ENSG00000065989	1053.58	0.536973	0.117552	4.56795	4.92515e-06	0.000275968	PDE4A
ENSG00000130164	1437.89	-0.669191	0.12938	-5.17228	2.31261e-07	2.01299e-05	LDLR
ENSG00000161914	81.0599	0.796189	0.25274	3.15023	0.00163141	0.0313158	ZNF653
ENSG00000105612	279.969	0.713636	0.235722	3.02745	0.00246627	0.0418299	DNASE2
ENSG00000267519	158.876	0.822101	0.277563	2.96186	0.00305789	0.048367	MIR24-2
ENSG00000132005	592.561	0.697063	0.174839	3.98689	6.69464e-05	0.00249741	RFX1
ENSG00000132002	1709.7	-0.431166	0.106876	-4.03429	5.47685e-05	0.00211731	DNAJB1
ENSG00000160113	1290.53	-0.479977	0.119099	-4.03007	5.57596e-05	0.00214364	NR2F6
ENSG00000130479	2834.74	0.590753	0.117278	5.03721	4.72357e-07	3.6319e-05	MAP1S
ENSG00000254858	932.788	-0.353617	0.118371	-2.98737	0.00281389	0.0457382	MPV17L2
ENSG00000130517	2282.36	-0.543091	0.115052	-4.72039	2.35396e-06	0.000153674	PGPEP1
ENSG00000064490	2922.94	-0.281847	0.0929053	-3.03371	0.00241571	0.0412249	RFXANK
ENSG00000064547	373.666	0.80328	0.22897	3.50823	0.000451094	0.0116483	LPAR2
ENSG00000161277	105.602	-0.77204	0.228685	-3.376	0.000735474	0.0172233	THAP8
ENSG00000105738	667.295	-0.555842	0.12054	-4.61127	4.00224e-06	0.000229838	SIPA1L3
ENSG00000187994	485.495	-0.487068	0.1611	-3.0234	0.00249955	0.0420849	RINL
ENSG00000123815	714.433	-0.437591	0.134544	-3.2524	0.00114434	0.0245926	ADCK4
ENSG00000142046	483.679	0.669099	0.162638	4.11404	3.88792e-05	0.00158728	TMEM91
ENSG00000105722	3930.52	0.50301	0.121435	4.14223	3.43946e-05	0.00142949	ERF
ENSG00000079435	66.6788	-1.10261	0.2791	-3.9506	7.79548e-05	0.00281696	LIPE
ENSG00000104783	1131.56	-0.670462	0.143692	-4.66598	3.07147e-06	0.00018563	KCNN4
ENSG00000130202	2497.94	0.939408	0.129111	7.27599	3.43881e-13	8.97983e-11	PVRL2
ENSG00000104856	735.778	0.682174	0.145372	4.69262	2.6973e-06	0.000168156	RELB
ENSG00000170684	362.702	-0.602451	0.139858	-4.3076	1.65034e-05	0.000767053	ZNF296
ENSG00000130201	2011.83	2.18498	0.384097	5.68861	1.28075e-08	1.50216e-06	EXOC3L2
ENSG00000267045	399.041	2.17231	0.435653	4.98633	6.15376e-07	4.65399e-05
ENSG00000125740	30.4782	2.10646	0.458596	4.59327	4.36355e-06	0.000246999	FOSB
ENSG00000104936	184.298	0.897707	0.234626	3.82611	0.000130182	0.0042898	DMPK
ENSG00000104983	570.968	-0.532944	0.130053	-4.09788	4.16947e-05	0.00167748	CCDC61
ENSG00000197380	112.07	2.79302	0.907964	3.07613	0.00209707	0.0375464	DACT3
ENSG00000130748	366.506	-0.591899	0.198251	-2.98561	0.00283013	0.0458117	TMEM160
ENSG00000130749	3389.96	0.290053	0.0861987	3.36494	0.000765601	0.0177784	ZC3H4
ENSG00000063176	807.15	-0.424078	0.117211	-3.61806	0.00029682	0.00841801	SPHK2
ENSG00000126453	1162.3	-0.370996	0.116347	-3.18871	0.0014291	0.0284026	BCL2L12
ENSG00000010361	586.261	-0.413357	0.119025	-3.47286	0.000514942	0.0129814	FUZ
ENSG00000169136	2625.14	0.451412	0.138682	3.25501	0.00113387	0.0244816	ATF5
ENSG00000105497	947.002	0.394077	0.123213	3.19833	0.00138226	0.027816	ZNF175
ENSG00000088053	605.481	0.911719	0.200097	4.55638	5.20418e-06	0.000285817	GP6
ENSG00000160469	157.186	-0.922801	0.24412	-3.78011	0.00015676	0.00497062	BRSK1
ENSG00000134326	1868.78	0.713506	0.175486	4.0659	4.78481e-05	0.00187597	CMPK2
ENSG00000134318	4162.42	0.374937	0.0932857	4.01923	5.83891e-05	0.00222007	ROCK2
ENSG00000151779	3309.87	-0.362561	0.0990416	-3.66069	0.000251534	0.00730772	NBAS
ENSG00000183891	281.623	0.755075	0.163057	4.63074	3.64358e-06	0.000213675	TTC32
ENSG00000055917	8105.86	0.315755	0.0893846	3.53255	0.000411576	0.0108914	PUM2
ENSG00000143878	696.775	1.84377	0.15379	11.9889	4.06206e-33	7.02737e-30	RHOB
ENSG00000118961	1774.84	-0.35362	0.1193	-2.96412	0.00303546	0.0481223	C2orf43
ENSG00000119778	1756.38	0.334172	0.109478	3.05242	0.00227003	0.0396182	ATAD2B
ENSG00000198399	3519.78	0.380271	0.0971097	3.9159	9.00694e-05	0.00315864	ITSN2
ENSG00000138073	1777.16	-0.381645	0.0953774	-4.00142	6.29633e-05	0.00238091	PREB
ENSG00000115970	1083.75	-0.395946	0.11799	-3.35576	0.000791462	0.0182564	THADA
ENSG00000152518	2125.78	-0.607196	0.180551	-3.36302	0.000770954	0.0178727	ZFP36L2
ENSG00000068784	1036.23	-0.320394	0.101861	-3.14539	0.00165863	0.0316627	SRBD1
ENSG00000116016	6517.87	2.3464	0.492696	4.76237	1.91334e-06	0.000131586	EPAS1
ENSG00000068912	1578.53	0.29392	0.0956027	3.07439	0.00210936	0.0376227	ERLEC1
ENSG00000119737	94.6902	1.20996	0.255929	4.72774	2.27037e-06	0.000150344	GPR75
ENSG00000198369	683.491	0.519759	0.147381	3.52664	0.000420861	0.0109965	SPRED2
ENSG00000115956	35184.2	-0.817991	0.153674	-5.32291	1.0212e-07	9.74722e-06	PLEK
ENSG00000187605	4450.9	0.542441	0.107651	5.03886	4.68302e-07	3.62084e-05	TET3
ENSG00000114993	1381.47	0.387473	0.130171	2.97665	0.00291413	0.0465905	RTKN
ENSG00000159399	5036.36	0.389377	0.122698	3.17345	0.00150637	0.0297406	HK2
ENSG00000176407	2246.3	0.318005	0.0975375	3.26034	0.0011128	0.0241777	KCMF1
ENSG00000239305	631.114	0.471675	0.130011	3.62797	0.000285657	0.00813475	RNF103
ENSG00000172086	589.379	0.523851	0.142064	3.68743	0.000226528	0.00674227	KRCC1
ENSG00000158050	224.916	-0.658419	0.174623	-3.77052	0.000162909	0.00510104	DUSP2
ENSG00000196843	680.398	1.19056	0.142913	8.33064	8.04097e-17	3.00776e-14	ARID5A
ENSG00000071054	9164.86	0.307473	0.0871274	3.529	0.000417134	0.0109685	MAP4K4
ENSG00000115607	87.231	1.37593	0.266793	5.1573	2.5053e-07	2.15362e-05	IL18RAP
ENSG00000135953	532.733	0.56141	0.148715	3.77507	0.000159961	0.00504296	MFSD9
ENSG00000115641	1039.14	-0.516388	0.160135	-3.22472	0.00126098	0.0262042	FHL2
ENSG00000153094	1830.68	0.749573	0.0970654	7.72235	1.14203e-14	3.3629e-12	BCL2L11
ENSG00000271590	85.6648	0.959198	0.289343	3.31509	0.000916139	0.0206092
ENSG00000153214	2396.17	0.463656	0.143557	3.22977	0.00123889	0.0258519	TMEM87B
ENSG00000144136	6498.97	-0.873712	0.145104	-6.02128	1.7304e-09	2.39487e-07	SLC20A1
ENSG00000125538	5934.74	-1.633	0.129322	-12.6274	1.49183e-36	2.94955e-33	IL1B
ENSG00000125637	2581.57	0.356955	0.0972185	3.67167	0.000240966	0.00706563	PSD4
ENSG00000125633	2866.34	0.471318	0.0993257	4.74518	2.08319e-06	0.000139958	CCDC93
ENSG00000169967	1815.91	0.390796	0.0998015	3.91573	9.01318e-05	0.00315864	MAP3K2
ENSG00000144228	1092.15	1.42435	0.159995	8.90245	5.46288e-19	2.80023e-16	SPOPL
ENSG00000153250	2448.55	0.576352	0.133804	4.30743	1.6516e-05	0.000767053	RBMS1
ENSG00000163092	385.462	0.6753	0.16549	4.08061	4.49169e-05	0.00178123	XIRP2
ENSG00000163072	1377.08	-0.47996	0.113495	-4.22891	2.34827e-05	0.00103175	NOSTRIN
ENSG00000152253	1957.36	-0.394682	0.130902	-3.01508	0.00256909	0.0428388	SPC25
ENSG00000144357	5348.3	-0.433637	0.11881	-3.64982	0.000262424	0.00758234	UBR3
ENSG00000071909	2098.36	-0.502529	0.126365	-3.97681	6.98466e-05	0.00259163	MYO3B
ENSG00000198586	3022.03	0.320588	0.0946802	3.38601	0.000709172	0.0168352	TLK1
ENSG00000079156	2182.04	-0.836129	0.168875	-4.95116	7.37714e-07	5.45987e-05	OSBPL6
ENSG00000115232	30046.7	-0.39764	0.13141	-3.02596	0.00247846	0.0419338	ITGA4
ENSG00000260742	77.644	0.901964	0.298274	3.02394	0.00249502	0.0420598
ENSG00000061676	3270.71	0.885257	0.104322	8.48578	2.14269e-17	8.72202e-15	NCKAP1
ENSG00000138448	3215.85	0.443782	0.108473	4.09119	4.2917e-05	0.00172166	ITGAV
ENSG00000064933	1443.45	-0.360864	0.1096	-3.29255	0.000992823	0.0219851	PMS1
ENSG00000229056	1813.82	0.737394	0.189131	3.89885	9.66496e-05	0.00332744
ENSG00000013441	2492.06	0.382709	0.117334	3.2617	0.00110744	0.0240991	CLK1
ENSG00000003402	1480.87	0.579336	0.194861	2.97307	0.00294837	0.0470651	CFLAR
ENSG00000003393	3459.05	-0.452594	0.131541	-3.44071	0.000580192	0.014339	ALS2
ENSG00000204217	2432.72	1.28493	0.137524	9.34329	9.33885e-21	5.87498e-18	BMPR2
ENSG00000114933	1329.47	0.351175	0.119127	2.9479	0.00319942	0.0498088	INO80D
ENSG00000021826	851.785	-0.434478	0.121336	-3.5808	0.000342547	0.00942515	CPS1
ENSG00000030419	1516.1	1.10938	0.181915	6.09834	1.07173e-09	1.59492e-07	IKZF2
ENSG00000270659	28.5594	1.2738	0.425548	2.99332	0.00275962	0.0451589
ENSG00000138375	1133.62	-0.505879	0.111191	-4.54966	5.3732e-06	0.000292776	SMARCAL1
ENSG00000135926	7244.17	0.753941	0.117882	6.39571	1.59807e-10	2.73053e-08	TMBIM1
ENSG00000144591	1252.86	-0.309835	0.10078	-3.07437	0.00210948	0.0376227	GMPPA
ENSG00000116106	65.6906	1.73511	0.330741	5.24611	1.5534e-07	1.42378e-05	EPHA4
ENSG00000132323	1486.92	0.360251	0.0987439	3.64834	0.000263945	0.00761041	ILKAP
ENSG00000144504	942.13	0.4904	0.115569	4.24333	2.20223e-05	0.000976888	ANKMY1
ENSG00000178623	485.694	1.87217	0.25338	7.3888	1.48156e-13	4.02055e-11	GPR35
ENSG00000146205	65.9708	-0.94277	0.301486	-3.12708	0.00176552	0.0332446	ANO7
ENSG00000125898	637.062	0.41454	0.129495	3.20119	0.00136859	0.0276112	FAM110A
ENSG00000088888	2109.14	-0.516856	0.119932	-4.30959	1.63559e-05	0.000764748	MAVS
ENSG00000125827	1671.36	0.391626	0.12119	3.23149	0.00123145	0.0258125	TMX4
ENSG00000125814	910.601	0.915152	0.134843	6.7868	1.14644e-11	2.59959e-09	NAPB
ENSG00000125968	620.297	-1.12466	0.187697	-5.9919	2.074e-09	2.78681e-07	ID1
ENSG00000078747	3500.48	0.305937	0.0997836	3.06601	0.00216937	0.038345	ITCH
ENSG00000101445	467.575	1.47328	0.434571	3.3902	0.000698428	0.0166087	PPP1R16B
ENSG00000124145	565.276	0.467766	0.140846	3.32113	0.000896544	0.0202748	SDC4
ENSG00000062598	1432	-0.345535	0.108213	-3.19309	0.0014076	0.0281251	ELMO2
ENSG00000124126	1974.34	0.978009	0.162703	6.01102	1.84357e-09	2.52624e-07	PREX1
ENSG00000101096	1763.67	0.669907	0.205265	3.26361	0.00110001	0.0240128	NFATC2
ENSG00000087586	3070.75	0.387885	0.128331	3.02254	0.00250666	0.0421104	AURKA
ENSG00000087589	1212.83	2.21225	0.151601	14.5925	3.133e-48	1.44536e-44	CASS4
ENSG00000101162	4386.41	-0.522069	0.175999	-2.96632	0.0030139	0.0478903	TUBB1
ENSG00000124215	673.746	0.789502	0.173046	4.56239	5.05752e-06	0.000281109	CDH26
ENSG00000125508	41.1704	1.78657	0.416883	4.28554	1.823e-05	0.000837383	SRMS
ENSG00000130589	460.013	1.15904	0.233483	4.96413	6.9008e-07	5.16254e-05	HELZ2
ENSG00000130584	235.019	0.906826	0.198894	4.55934	5.13158e-06	0.000284084	ZBTB46
ENSG00000171700	2610.5	1.13864	0.11369	10.0153	1.30539e-23	1.0037e-20	RGS19
ENSG00000125510	131.508	1.70376	0.290374	5.86747	4.42499e-09	5.56744e-07	OPRL1
ENSG00000155307	13823.4	0.594868	0.159551	3.72838	0.000192715	0.00590084	SAMSN1
ENSG00000180530	12617.4	0.570685	0.0990501	5.76157	8.33327e-09	1.02064e-06	NRIP1
ENSG00000154734	2211.93	-1.10901	0.200014	-5.54464	2.94567e-08	3.28775e-06	ADAMTS1
ENSG00000156253	1379.01	-0.478027	0.111884	-4.27252	1.93278e-05	0.000872608	RWDD2B
ENSG00000159128	2003.82	0.40257	0.113846	3.53608	0.000406113	0.0108088	IFNGR2
ENSG00000205726	1193.28	-0.36292	0.118427	-3.0645	0.00218034	0.0384897	ITSN1
ENSG00000159228	229.196	-0.617228	0.190882	-3.23356	0.00122258	0.025791	CBR1
ENSG00000159256	3821.23	0.403231	0.121129	3.32893	0.000871807	0.0198451	MORC3
ENSG00000185808	726.947	-0.361187	0.113135	-3.19253	0.00141032	0.0281251	PIGP
ENSG00000160185	643.653	0.733731	0.145207	5.05299	4.34953e-07	3.40099e-05	UBASH3A
ENSG00000160209	1644.82	0.420083	0.116135	3.61719	0.000297822	0.00842916	PDXK
ENSG00000184441	149.302	1.10456	0.234273	4.71484	2.41901e-06	0.000156821
ENSG00000183250	69.0667	-0.798766	0.26716	-2.98984	0.00279123	0.0455013	C21orf67
ENSG00000243156	1466.9	0.340438	0.110362	3.08473	0.00203737	0.0368592	MICAL3
ENSG00000273311	139.42	-0.739559	0.237189	-3.11802	0.00182071	0.0339147	DGCR11
ENSG00000186716	2680.95	0.346606	0.101259	3.42298	0.000619389	0.0151455	BCR
ENSG00000100104	1757.32	-0.349941	0.117171	-2.98659	0.00282112	0.0457729	SRRD
ENSG00000180957	5430.55	0.34557	0.0916506	3.77052	0.000162906	0.00510104	PITPNB
ENSG00000100219	5074.65	-0.413728	0.124981	-3.31033	0.000931853	0.0208014	XBP1
ENSG00000182944	18447.3	0.270674	0.0889813	3.04192	0.00235071	0.0405153	EWSR1
ENSG00000100276	130.036	0.771165	0.244977	3.14791	0.00164442	0.0314622	RASL10A
ENSG00000099985	139.99	-0.987751	0.24746	-3.99155	6.56418e-05	0.00246201	OSM
ENSG00000100003	68.9065	2.50874	0.353295	7.10097	1.23886e-12	3.0424e-10	SEC14L2
ENSG00000182541	998.349	0.35616	0.119597	2.97801	0.00290128	0.0465281	LIMK2
ENSG00000100368	11455.2	-0.521866	0.177	-2.94839	0.00319429	0.0497849	CSF2RB
ENSG00000128309	1496.36	-0.5171	0.159964	-3.23259	0.00122672	0.025791	MPST
ENSG00000128340	2943.65	-0.310601	0.100843	-3.08005	0.00206964	0.037394	RAC2
ENSG00000100055	169.549	1.08718	0.210134	5.17372	2.29481e-07	2.01014e-05	CYTH4
ENSG00000100092	2397.98	0.617288	0.204879	3.01295	0.00258725	0.0428833	SH3BP1
ENSG00000100393	6063.59	0.323302	0.104174	3.10349	0.00191255	0.0351991	EP300
ENSG00000167074	310.609	-0.559451	0.161054	-3.47368	0.000513366	0.0129653	TEF
ENSG00000260708	395.31	0.62598	0.159588	3.92248	8.76414e-05	0.00312618
ENSG00000100426	4805.64	0.359533	0.111012	3.23869	0.00120078	0.0254493	ZBED4
ENSG00000073146	43.159	1.43652	0.423016	3.39591	0.000684012	0.0164068	MOV10L1
ENSG00000251322	8570.66	0.513823	0.14929	3.44179	0.000577876	0.0143073	SHANK3
ENSG00000134107	892.538	0.55474	0.141671	3.91568	9.01489e-05	0.00315864	BHLHE40
ENSG00000114026	464.022	-0.560801	0.16093	-3.48476	0.000492581	0.0126013	OGG1
ENSG00000156990	1444.77	-0.396521	0.101864	-3.89264	9.91573e-05	0.00338014	RPUSD3
ENSG00000180385	436.395	0.434699	0.143003	3.03978	0.00236754	0.0406535	EMC3-AS1
ENSG00000088726	238.945	2.05165	0.264175	7.76625	8.08421e-15	2.54285e-12	TMEM40
ENSG00000154767	811.905	0.39418	0.12682	3.1082	0.00188234	0.0347817	XPC
ENSG00000224660	141.122	1.07071	0.211869	5.05363	4.33488e-07	3.40099e-05	SH3BP5-AS1
ENSG00000172936	2043.61	0.292786	0.0978162	2.99323	0.00276044	0.0451589	MYD88
ENSG00000272077	108.056	1.11006	0.234192	4.73997	2.13752e-06	0.000142914
ENSG00000177479	6354.32	0.401042	0.0855018	4.69045	2.72605e-06	0.000169186	ARIH2
ENSG00000185614	1383.84	-0.312822	0.104507	-2.99332	0.00275959	0.0451589	FAM212A
ENSG00000010319	140.222	1.62494	0.263824	6.15917	7.31256e-10	1.11215e-07	SEMA3G
ENSG00000163935	519.19	0.536361	0.167062	3.21055	0.0013248	0.0269544	SFMBT1
ENSG00000162290	2222.4	0.327478	0.10249	3.19522	0.00139723	0.0280467	DCP1A
ENSG00000168374	7373.89	0.31909	0.0943604	3.38161	0.000720617	0.0170193	ARF4
ENSG00000271856	312.73	0.755367	0.246697	3.06193	0.00219917	0.0385674
ENSG00000031081	841.501	2.59279	0.150732	17.2013	2.59694e-66	3.59417e-62	ARHGAP31
ENSG00000082701	3478.84	0.303639	0.095649	3.17451	0.00150089	0.0296748	GSK3B
ENSG00000145088	150.165	-0.643401	0.191455	-3.36059	0.000777753	0.0179701	EAF2
ENSG00000132394	783.618	-0.330995	0.108515	-3.05022	0.00228676	0.0397737	EEFSEC
ENSG00000179348	21047.2	-0.564437	0.0924513	-6.10524	1.02646e-09	1.54415e-07	GATA2
ENSG00000198585	625.07	-0.454854	0.131602	-3.45628	0.000547691	0.013732	NUDT16
ENSG00000081307	2480.68	0.344819	0.106483	3.23827	0.00120259	0.0254493	UBA5
ENSG00000114098	4370.9	-0.680062	0.10662	-6.37839	1.78956e-10	3.02042e-08	ARMC8
ENSG00000114107	1681.92	-0.388524	0.103191	-3.76508	0.000166493	0.00520151	CEP70
ENSG00000181744	1936.59	0.353548	0.110834	3.18989	0.00142329	0.0283429	C3orf58
ENSG00000173905	3085.12	0.338207	0.109472	3.08942	0.00200546	0.0364247	GOLIM4
ENSG00000085276	2339.05	0.45491	0.116635	3.90028	9.60803e-05	0.00331609	MECOM
ENSG00000136603	1921.37	1.63488	0.545713	2.99587	0.00273662	0.0449286	SKIL
ENSG00000075651	103.902	-0.660463	0.220238	-2.99886	0.00270988	0.0445425	PLD1
ENSG00000075420	988.335	1.09655	0.227609	4.8177	1.45224e-06	0.000103072	FNDC3B
ENSG00000177565	5430.19	0.365321	0.114341	3.19501	0.00139828	0.0280467	TBL1XR1
ENSG00000078070	929.692	-0.433339	0.112098	-3.8657	0.000110772	0.00373922	MCCC1
ENSG00000161202	4661.92	0.854329	0.126918	6.73137	1.68078e-11	3.37131e-09	DVL3
ENSG00000113790	471.653	-0.480085	0.136137	-3.52649	0.00042111	0.0109965	EHHADH
ENSG00000163898	200.631	-0.732468	0.247222	-2.96279	0.00304863	0.0482758	LIPH
ENSG00000073282	117.985	2.04625	0.274227	7.46188	8.52959e-14	2.40917e-11	TP63
ENSG00000178732	649.27	0.515923	0.141608	3.64332	0.000269141	0.00772804	GP5
ENSG00000133657	3934.61	0.342881	0.103455	3.31431	0.000918712	0.0206092	ATP13A3
ENSG00000041802	2307.08	0.413992	0.0926996	4.46595	7.9714e-06	0.000413199	LSG1
ENSG00000185112	800.779	1.20569	0.20316	5.93468	2.94424e-09	3.91811e-07	FAM43A
ENSG00000174004	2701.91	-0.474834	0.108153	-4.39039	1.13149e-05	0.00055928	NRROS
ENSG00000161267	636.45	-0.954118	0.165913	-5.7507	8.88747e-09	1.07897e-06	BDH1
ENSG00000122068	4217.7	0.35713	0.113088	3.15798	0.00158867	0.030881	FYTTD1
ENSG00000168936	1560.85	-0.333737	0.111059	-3.00504	0.00265546	0.043804	TMEM129
ENSG00000068078	1319.32	1.02244	0.203283	5.02965	4.91377e-07	3.75727e-05	FGFR3
ENSG00000170846	1330.98	-0.32555	0.101296	-3.21386	0.00130964	0.0268525
ENSG00000196526	366.306	1.16296	0.227841	5.10424	3.32128e-07	2.7361e-05	AFAP1
ENSG00000125089	115.095	1.10998	0.301669	3.67948	0.000233712	0.00688207	SH3TC1
ENSG00000038219	3823.77	0.38897	0.111115	3.50062	0.00046418	0.0119188	BOD1L1
ENSG00000163257	2546.53	0.382733	0.0980703	3.90264	9.51499e-05	0.00329219	DCAF16
ENSG00000109787	2117.72	0.5658	0.105071	5.38495	7.24629e-08	7.21501e-06	KLF3
ENSG00000109814	295.519	-0.515611	0.148095	-3.48161	0.000498403	0.01268	UGDH
ENSG00000168421	858.82	0.706526	0.131344	5.3792	7.48174e-08	7.39624e-06	RHOH
ENSG00000090989	1802.12	-0.307064	0.0943795	-3.2535	0.00113993	0.0245725	EXOC1
ENSG00000084093	3468.81	0.306024	0.100245	3.05277	0.00226742	0.0396182	REST
ENSG00000250775	164.308	2.17455	0.344593	6.31048	2.78171e-10	4.63842e-08
ENSG00000173597	207.739	-0.641741	0.197928	-3.2423	0.00118569	0.0252074	SULT1B1
ENSG00000173542	5666.95	0.386873	0.124366	3.11075	0.00186612	0.0345744	MOB1B
ENSG00000138669	1127.14	-0.545863	0.160227	-3.4068	0.000657298	0.0159317	PRKG2
ENSG00000189308	1674.93	0.373826	0.109933	3.40049	0.000672641	0.0161902	LIN54
ENSG00000164056	2084.97	1.70487	0.12171	14.0077	1.39939e-44	4.84189e-41	SPRY1
ENSG00000151458	3229.85	0.528155	0.114191	4.62518	3.74273e-06	0.000217644	ANKRD50
ENSG00000138650	255.05	-0.89862	0.239792	-3.74751	0.000178602	0.00555472	PCDH10
ENSG00000151012	1271.99	0.610537	0.159912	3.81795	0.000134567	0.00438213	SLC7A11
ENSG00000197465	5678.2	-0.409924	0.126412	-3.24276	0.00118377	0.0252053	GYPE
ENSG00000250361	5437.53	-0.450714	0.146476	-3.07705	0.00209057	0.0374883	GYPB
ENSG00000151623	315.855	-1.43524	0.222741	-6.44354	1.16718e-10	2.071e-08	NR3C2
ENSG00000052802	1074.12	-0.807589	0.15344	-5.26322	1.41555e-07	1.30608e-05	MSMO1
ENSG00000154447	1117.11	0.541785	0.113041	4.79282	1.64455e-06	0.000114375	SH3RF1
ENSG00000151718	4017.33	0.855625	0.142441	6.00686	1.89151e-09	2.56652e-07	WWC2
ENSG00000164306	424.561	-0.482859	0.162008	-2.98047	0.00287809	0.0462277	PRIMPOL
ENSG00000151726	321.306	1.33509	0.249184	5.35785	8.42201e-08	8.15109e-06	ACSL1
ENSG00000151729	1004.9	-0.382699	0.129412	-2.95722	0.00310423	0.0489323	SLC25A4
ENSG00000188242	2647.22	0.564849	0.104233	5.41908	5.99063e-08	6.05185e-06
ENSG00000066230	1883.98	0.761727	0.146938	5.18399	2.17189e-07	1.91458e-05	SLC9A3
ENSG00000153395	2076.46	-0.499712	0.106019	-4.7134	2.43616e-06	0.000156821	LPCAT1
ENSG00000150756	472.625	-0.534786	0.137018	-3.90303	9.49975e-05	0.00329219	FAM173B
ENSG00000154122	2544.1	0.817188	0.10997	7.431	1.07781e-13	2.98337e-11	ANKH
ENSG00000145555	252.269	2.03283	0.49177	4.13369	3.56983e-05	0.00147482	MYO10
ENSG00000164190	8012.98	0.303262	0.0935014	3.2434	0.00118113	0.0251878	NIPBL
ENSG00000164327	2197.12	0.309883	0.101808	3.0438	0.00233612	0.0403313	RICTOR
ENSG00000170571	2225.78	0.425719	0.120646	3.52867	0.000417659	0.0109685	EMB
ENSG00000151883	184.347	0.97908	0.174104	5.62353	1.87091e-08	2.13995e-06	PARP8
ENSG00000134363	1842.61	-0.756204	0.170401	-4.4378	9.08844e-06	0.000465867	FST
ENSG00000134352	1583.87	0.299594	0.101292	2.95774	0.00309908	0.0489067	IL6ST
ENSG00000095015	1029.29	0.986872	0.117183	8.42163	3.71297e-17	1.42743e-14	MAP3K1
ENSG00000175857	3354.64	0.781561	0.115291	6.77902	1.20993e-11	2.658e-09	GAPT
ENSG00000130449	631.786	0.560205	0.146869	3.81431	0.000136563	0.00442632	ZSWIM6
ENSG00000145740	4438.77	0.624687	0.197555	3.16209	0.00156644	0.0306137	SLC30A5
ENSG00000083312	9932.31	0.439627	0.0862102	5.09947	3.40599e-07	2.78928e-05	TNPO1
ENSG00000171617	1315.55	2.16164	0.183852	11.7575	6.46382e-32	9.93991e-29	ENC1
ENSG00000164347	2171.48	-0.455462	0.131468	-3.46444	0.000531346	0.0133463	GFM2
ENSG00000152348	302.015	-0.455484	0.153433	-2.96861	0.00299145	0.0476429	ATG10
ENSG00000081189	6378.16	-0.507339	0.120776	-4.20067	2.66128e-05	0.001151	MEF2C
ENSG00000113532	476.744	1.33626	0.162946	8.20062	2.39146e-16	8.48662e-14	ST8SIA4
ENSG00000173930	457.92	0.87227	0.246607	3.53709	0.000404562	0.0108088	SLCO4C1
ENSG00000184349	444.738	-0.684504	0.162865	-4.20289	2.63534e-05	0.00114336	EFNA5
ENSG00000164211	1635.55	0.608886	0.142156	4.28322	1.84204e-05	0.000837792	STARD4
ENSG00000129595	286.177	1.04976	0.23837	4.4039	1.06324e-05	0.000529325	EPB41L4A
ENSG00000134982	2215.73	0.510005	0.105306	4.8431	1.27828e-06	9.11928e-05	APC
ENSG00000129625	1549.48	0.368945	0.115561	3.19266	0.0014097	0.0281251	REEP5
ENSG00000113396	224.272	0.993176	0.169912	5.84522	5.0589e-09	6.30767e-07	SLC27A6
ENSG00000198108	254.675	1.52582	0.226539	6.73536	1.6352e-11	3.32812e-09	CHSY3
ENSG00000217128	1502.57	0.340248	0.0991652	3.43112	0.000601085	0.0147762	FNIP1
ENSG00000171604	2930.81	0.980957	0.144858	6.77186	1.2714e-11	2.70711e-09	CXXC5
ENSG00000113649	5940.21	0.344161	0.0880365	3.9093	9.25657e-05	0.00322698	TCERG1
ENSG00000230551	395.949	0.487853	0.146269	3.3353	0.000852062	0.0194866
ENSG00000155846	1967.65	0.690478	0.105608	6.53809	6.23085e-11	1.13467e-08	PPARGC1B
ENSG00000164574	3928.49	-0.524705	0.0941964	-5.57033	2.5426e-08	2.88439e-06	GALNT10
ENSG00000170271	161.605	-0.713676	0.228193	-3.12751	0.00176295	0.0332446	FAXDC2
ENSG00000135077	964.814	2.42896	0.212554	11.4275	3.04784e-30	4.21822e-27	HAVCR2
ENSG00000253522	403.984	0.668577	0.210759	3.17224	0.00151269	0.0298228	MIR146A
ENSG00000113742	1098.57	0.413883	0.136227	3.03819	0.00238005	0.0408177	CPEB4
ENSG00000146083	4329.54	0.422881	0.116458	3.63118	0.000282124	0.00806734	RNF44
ENSG00000146094	2572.02	0.402364	0.125646	3.20237	0.00136303	0.0275393	DOK3
ENSG00000161021	3664.18	0.708852	0.15084	4.69936	2.60977e-06	0.000167219	MAML1
ENSG00000124535	2916.64	-0.354974	0.110576	-3.21023	0.0013263	0.0269544	WRNIP1
ENSG00000180822	937.756	0.415913	0.117442	3.54144	0.000397952	0.0106736	PSMG4
ENSG00000145982	615.302	-0.516816	0.129755	-3.98301	6.80481e-05	0.00253168	FARS2
ENSG00000153162	1094.43	1.09099	0.174929	6.23676	4.46741e-10	7.02601e-08	BMP6
ENSG00000205269	1486.61	0.650443	0.139205	4.67254	2.97495e-06	0.000181755	TMEM170B
ENSG00000137198	754.045	0.478646	0.136075	3.51751	0.000435615	0.0113113	GMPR
ENSG00000272341	37.6212	1.36012	0.41743	3.25831	0.00112077	0.0242746
ENSG00000112304	1917.88	-0.357743	0.108624	-3.29339	0.000989872	0.0219549	ACOT13
ENSG00000111913	1036.8	0.796067	0.138716	5.73883	9.53332e-09	1.14731e-06	FAM65B
ENSG00000220517	51.4523	1.09572	0.356915	3.06997	0.00214077	0.0380338	ASS1P1
ENSG00000112343	761.808	0.48422	0.152934	3.1662	0.00154446	0.0303627	TRIM38
ENSG00000026950	484.738	-0.626575	0.132603	-4.72521	2.2988e-06	0.000150784	BTN3A1
ENSG00000204569	3129.33	0.387891	0.107161	3.61968	0.000294964	0.00838255	PPP1R10
ENSG00000137331	31.4431	1.92324	0.521902	3.68506	0.00022865	0.00676781	IER3
ENSG00000204386	1884.62	-0.284527	0.0939409	-3.02878	0.0024554	0.0417479	NEU1
ENSG00000204371	3386.25	-0.364922	0.106574	-3.42411	0.000616813	0.0151092	EHMT2
ENSG00000112039	732.296	-0.376071	0.120588	-3.11864	0.00181687	0.0338888	FANCE
ENSG00000137193	4081.2	-1.43184	0.456465	-3.1368	0.00170801	0.0323376	PIM1
ENSG00000112195	1289.39	-0.428534	0.125598	-3.41196	0.000644974	0.0156908	TREML2
ENSG00000124574	486.361	-0.430572	0.132358	-3.25308	0.00114163	0.0245725	ABCC10
ENSG00000112715	3056.77	0.74926	0.127388	5.88171	4.06048e-09	5.1557e-07	VEGFA
ENSG00000137216	1029.3	-0.436286	0.129358	-3.37271	0.000744326	0.0173718	TMEM63B
ENSG00000146085	1063.61	-0.441141	0.11688	-3.77432	0.000160444	0.00504669	MUT
ENSG00000096006	170.59	1.24375	0.197497	6.29759	3.02317e-10	4.92244e-08	CRISP3
ENSG00000170915	436.974	-0.844161	0.149819	-5.63453	1.75539e-08	2.02963e-06	PAQR8
ENSG00000216775	594.003	-0.606791	0.137763	-4.40459	1.05983e-05	0.000529325
ENSG00000118432	104.345	1.72008	0.351481	4.8938	9.89075e-07	7.16691e-05	CNR1
ENSG00000132424	7847.41	0.395433	0.115898	3.41191	0.00064509	0.0156908	PNISR
ENSG00000118689	3072.03	-0.415523	0.108445	-3.83166	0.000127284	0.00420432	FOXO3
ENSG00000080546	1469.16	-0.56692	0.102518	-5.52994	3.20338e-08	3.51864e-06	SESN1
ENSG00000183137	1004.04	-0.396485	0.103463	-3.83214	0.000127034	0.00420432	CEP57L1
ENSG00000260273	73.1647	-1.16649	0.288394	-4.04478	5.23728e-05	0.00203606
ENSG00000112367	477.411	-0.457838	0.145264	-3.15176	0.0016229	0.0313158	FIG4
ENSG00000178425	758.514	-0.353825	0.115313	-3.06838	0.00215219	0.0381387	NT5DC1
ENSG00000111885	2681.4	0.4002	0.0983239	4.07022	4.69683e-05	0.00184671	MAN1A1
ENSG00000135547	203.005	1.69359	0.192734	8.78714	1.53414e-18	7.32153e-16	HEY2
ENSG00000112379	341.569	0.871238	0.210617	4.13659	3.52499e-05	0.00146066	KIAA1244
ENSG00000135540	186.064	0.835398	0.195543	4.27219	1.93563e-05	0.000872608	NHSL1
ENSG00000112419	4593.25	0.306626	0.0982442	3.12106	0.00180201	0.0337024	PHACTR2
ENSG00000055208	5063.25	0.316968	0.102365	3.09644	0.00195858	0.0359029	TAB2
ENSG00000120254	4612.87	0.477735	0.0893459	5.34703	8.94095e-08	8.59324e-06	MTHFD1L
ENSG00000078269	1388.49	1.03744	0.121411	8.54484	1.28713e-17	5.56682e-15	SYNJ2
ENSG00000130338	1412.94	0.392994	0.0972521	4.04098	5.32279e-05	0.00206351	TULP4
ENSG00000112531	15120.4	0.43166	0.109001	3.96015	7.49013e-05	0.00274856	QKI
ENSG00000164818	1715.64	-0.32681	0.109299	-2.99005	0.00278933	0.0455013	HEATR2
ENSG00000164877	1001.3	-0.776112	0.192498	-4.03178	5.53554e-05	0.00213404	MICALL2
ENSG00000182095	4801.11	0.430143	0.137548	3.12723	0.00176462	0.0332446	TNRC18
ENSG00000075618	7220.65	0.593551	0.142122	4.17634	2.96231e-05	0.00126149	FSCN1
ENSG00000236609	195.065	0.636398	0.208675	3.04971	0.00229061	0.0397767	ZNF853
ENSG00000273477	210.376	-0.589233	0.186889	-3.15286	0.0016168	0.0312958
ENSG00000214960	546.195	-0.444122	0.129811	-3.42129	0.000623246	0.0152129	ISPD
ENSG00000106546	675.372	0.698957	0.161424	4.32994	1.4915e-05	0.000706337	AHR
ENSG00000228649	218.62	0.513164	0.162844	3.15126	0.00162568	0.0313158
ENSG00000153814	213.346	2.71009	0.274004	9.8907	4.56821e-23	3.32758e-20	JAZF1
ENSG00000146592	2838.73	0.296313	0.0896265	3.30608	0.0009461	0.0210326	CREB5
ENSG00000273014	94.9169	1.15967	0.293003	3.95789	7.56152e-05	0.00276125
ENSG00000086289	1666.86	-0.380219	0.102852	-3.69676	0.000218367	0.0065469	EPDR1
ENSG00000106070	4015	0.618655	0.120388	5.13884	2.7644e-07	2.33288e-05	GRB10
ENSG00000132434	689.22	0.474628	0.124226	3.82067	0.000133092	0.0043649	LANCL2
ENSG00000106609	4339.24	0.400419	0.102412	3.90987	9.23444e-05	0.00322698	TMEM248
ENSG00000106089	57.895	1.28544	0.33271	3.86354	0.000111755	0.00376322	STX1A
ENSG00000106665	285.67	0.724547	0.203912	3.55324	0.000380519	0.0102659	CLIP2
ENSG00000127947	3730.86	0.695308	0.125535	5.53877	3.04605e-08	3.37259e-06	PTPN12
ENSG00000006576	1357.32	0.706495	0.158041	4.47034	7.8095e-06	0.000406329	PHTF2
ENSG00000164659	431.035	0.52164	0.176747	2.95133	0.00316409	0.0495144	KIAA1324L
ENSG00000085563	5257.73	0.786613	0.15042	5.22943	1.7003e-07	1.53805e-05	ABCB1
ENSG00000008277	1389.97	-0.400328	0.108642	-3.68483	0.000228854	0.00676781	ADAM22
ENSG00000105810	13395.4	0.512005	0.0895529	5.71735	1.08198e-08	1.27988e-06	CDK6
ENSG00000177409	302.512	-0.742801	0.210236	-3.53319	0.000410584	0.0108899	SAMD9L
ENSG00000158528	1586.65	0.379276	0.101584	3.73363	0.000188743	0.00579918	PPP1R9A
ENSG00000197093	32.6702	1.90843	0.457688	4.16971	3.04981e-05	0.00128925	GAL3ST4
ENSG00000196411	1840.48	0.745628	0.176892	4.21516	2.49597e-05	0.00108972	EPHB4
ENSG00000135269	4702.59	0.657875	0.0906491	7.25738	3.94663e-13	1.01151e-10	TES
ENSG00000106034	671.074	-0.544879	0.139141	-3.91601	9.00249e-05	0.00315864	CPED1
ENSG00000128578	185.138	0.899956	0.198604	4.53141	5.85919e-06	0.000316763	STRIP2
ENSG00000231721	154.592	1.05705	0.262813	4.02204	5.76957e-05	0.00220582	LINC-PINT
ENSG00000128567	2658.38	0.386139	0.111957	3.44901	0.000562649	0.0140087	PODXL
ENSG00000221866	605.004	0.575154	0.166995	3.44414	0.000572881	0.0142091	PLXNA4
ENSG00000105939	8810.87	0.53791	0.095474	5.6341	1.7598e-08	2.02963e-06	ZC3HAV1
ENSG00000146904	67.5014	2.37826	0.371168	6.40752	1.4791e-10	2.55885e-08	EPHA1
ENSG00000164867	125.955	1.08878	0.25129	4.33277	1.47247e-05	0.000702725	NOS3
ENSG00000055609	4177.76	0.352395	0.108401	3.25086	0.00115058	0.0246501	KMT2C
ENSG00000186480	5440.65	0.790262	0.189712	4.16559	3.10553e-05	0.00130244	INSIG1
ENSG00000184863	2714.04	0.460959	0.116049	3.97211	7.12374e-05	0.00262214	RBM33
ENSG00000105983	3674.91	0.465029	0.109264	4.25603	2.08091e-05	0.000932034	LMBR1
ENSG00000146909	2199.82	0.400667	0.109273	3.66665	0.000245751	0.00717551	NOM1
ENSG00000078674	7619.03	0.260834	0.0843608	3.09188	0.00198891	0.0361795	PCM1
ENSG00000158941	6966.23	0.309415	0.102621	3.01512	0.00256877	0.0428388	CCAR2
ENSG00000165392	2630.46	0.308931	0.101993	3.02896	0.00245399	0.0417479	WRN
ENSG00000254087	6854.95	0.315891	0.0906979	3.48289	0.000496027	0.0126427	LYN
ENSG00000104388	3622.7	0.511402	0.0976393	5.23766	1.62626e-07	1.48075e-05	RAB2A
ENSG00000171316	4694.52	0.473879	0.114893	4.12452	3.71503e-05	0.00153024	CHD7
ENSG00000205268	4071.53	0.371833	0.104052	3.57354	0.000352182	0.00961379	PDE7A
ENSG00000066777	4692.77	0.309405	0.0958319	3.22863	0.00124387	0.0258874	ARFGEF1
ENSG00000121039	992.063	-0.705212	0.219205	-3.21713	0.00129479	0.0267063	RDH10
ENSG00000164684	1892.73	0.73099	0.143408	5.09729	3.44555e-07	2.80508e-05	ZNF704
ENSG00000164924	8398.05	0.26112	0.0852855	3.06172	0.00220068	0.0385674	YWHAZ
ENSG00000048392	1073.11	0.489527	0.12866	3.8048	0.000141916	0.00458906	RRM2B
ENSG00000155090	657.823	0.411997	0.13354	3.08521	0.00203412	0.0368484	KLF10
ENSG00000177570	43.6471	-1.11693	0.341077	-3.27472	0.00105768	0.0232355	SAMD12
ENSG00000147689	32.7239	1.81882	0.40556	4.48472	7.30084e-06	0.000381297	FAM83A
ENSG00000164983	302.167	0.75688	0.174825	4.32937	1.49535e-05	0.000706337	TMEM65
ENSG00000155926	127.663	-1.26685	0.284444	-4.45378	8.43713e-06	0.000435709	SLA
ENSG00000259758	1953.57	0.41611	0.105088	3.95962	7.50691e-05	0.00274856	CASC7
ENSG00000104524	124.732	-0.68489	0.212568	-3.22198	0.00127309	0.0264161	PYCRL
ENSG00000178209	3894	1.62527	0.199209	8.15865	3.38794e-16	1.17223e-13	PLEC
ENSG00000167700	278.752	-0.660888	0.157443	-4.19765	2.69704e-05	0.00116284	MFSD3
ENSG00000153714	281.313	1.81053	0.253331	7.14688	8.87694e-13	2.23376e-10	LURAP1L
ENSG00000214121	45.3398	1.60952	0.391514	4.11102	3.93919e-05	0.00160348	TDPX2
ENSG00000164946	5025.68	-0.529164	0.111211	-4.75821	1.95317e-06	0.000133162	FREM1
ENSG00000188352	320.022	-0.527974	0.173848	-3.03699	0.00238956	0.0408795	FOCAD
ENSG00000164978	583.285	-0.395099	0.124743	-3.16731	0.00153855	0.0302896	NUDT2
ENSG00000164967	614.765	-0.380018	0.122467	-3.10301	0.00191562	0.0352087	RPP25L
ENSG00000137124	1416.74	-0.510641	0.135117	-3.77924	0.000157307	0.00497062	ALDH1B1
ENSG00000198887	1724.31	0.319478	0.10601	3.01366	0.00258114	0.0428546	SMC5
ENSG00000187210	179.21	-1.16552	0.3153	-3.69655	0.000218545	0.0065469	GCNT1
ENSG00000148019	736.785	-0.361063	0.120313	-3.00103	0.00269072	0.0442802	CEP78
ENSG00000196730	3485.72	-0.386743	0.121386	-3.18605	0.00144229	0.0285979	DAPK1
ENSG00000187764	1064.38	0.644437	0.213841	3.01362	0.00258147	0.0428546	SEMA4D
ENSG00000165025	1967.07	0.439609	0.102647	4.28271	1.84629e-05	0.000837792	SYK
ENSG00000131669	93.3598	1.13237	0.383982	2.94903	0.00318774	0.0497388	NINJ1
ENSG00000148110	1836.03	0.381379	0.112929	3.37714	0.000732429	0.0171811	HIATL1
ENSG00000136813	7045.83	0.288882	0.0924061	3.12622	0.00177067	0.0332963	KIAA0368
ENSG00000259953	523.227	1.12097	0.165532	6.77191	1.27097e-11	2.70711e-09
ENSG00000106868	2828.15	0.665965	0.1602	4.15708	3.22339e-05	0.00134373	SUSD1
ENSG00000119314	8932.64	0.574114	0.111918	5.12978	2.90079e-07	2.43315e-05	PTBP3
ENSG00000165185	1236.49	0.3385	0.108444	3.12144	0.00179967	0.0337024	KIAA1958
ENSG00000148158	495.307	0.461973	0.138526	3.33492	0.000853244	0.0194866	SNX30
ENSG00000148219	51.6036	-0.94505	0.302347	-3.12571	0.00177375	0.033309	ASTN2
ENSG00000136848	26.3207	4.11578	0.675804	6.09019	1.12774e-09	1.66042e-07	DAB2IP
ENSG00000119421	2181.44	-0.326903	0.101643	-3.21619	0.00129903	0.0267538	NDUFA8
ENSG00000261094	158.728	0.655572	0.215329	3.04451	0.0023306	0.0403193
ENSG00000119408	3147.27	1.7202	0.432713	3.97538	7.02675e-05	0.00259334	NEK6
ENSG00000095370	588.625	0.587154	0.158169	3.71219	0.000205478	0.00625013	SH2D3C
ENSG00000136840	312.769	-0.602964	0.199164	-3.02747	0.00246613	0.0418299	ST6GALNAC4
ENSG00000234771	277.324	0.795913	0.180982	4.39776	1.09376e-05	0.000542568
ENSG00000198917	2346.31	-0.360268	0.100895	-3.57071	0.000356013	0.00969925	C9orf114
ENSG00000130723	6814.57	0.2803	0.0940494	2.98035	0.00287921	0.0462277	PRRC2B
ENSG00000165702	665.193	-1.14592	0.231207	-4.95623	7.18725e-07	5.34793e-05	GFI1B
ENSG00000160271	1275.53	0.638056	0.204476	3.12044	0.00180583	0.0337284	RALGDS
ENSG00000148288	510.192	1.2606	0.237573	5.30614	1.11969e-07	1.0614e-05	GBGT1
ENSG00000148400	3825.73	0.857443	0.155129	5.52727	3.25243e-08	3.54438e-06	NOTCH1
ENSG00000198113	4106.29	0.295659	0.0877213	3.37043	0.0007505	0.0174864	TOR4A
ENSG00000198435	408.798	0.485494	0.149882	3.23918	0.00119875	0.0254458	NRARP
ENSG00000165802	2995.77	1.05957	0.171324	6.1846	6.22621e-10	9.57453e-08	NSMF
ENSG00000180182	5473.07	0.477147	0.110701	4.31023	1.63085e-05	0.000764748	MED14
ENSG00000124486	7187.05	0.32173	0.0878273	3.66321	0.000249076	0.00725728	USP9X
ENSG00000102221	1968.43	0.494432	0.106533	4.64113	3.46506e-06	0.000205821	JADE3
ENSG00000102057	249.098	1.00423	0.216286	4.64309	3.4324e-06	0.000204761	KCND1
ENSG00000186767	3821.42	0.379346	0.108734	3.48875	0.000485287	0.0124377	SPIN4
ENSG00000090776	206.629	1.0325	0.219936	4.69452	2.67232e-06	0.000168156	EFNB1
ENSG00000196338	81.7299	1.11188	0.255434	4.35293	1.34333e-05	0.000652339	NLGN3
ENSG00000147130	5020.69	-0.491089	0.0904286	-5.43069	5.61371e-08	5.75509e-06	ZMYM3
ENSG00000131263	4879.46	0.377649	0.126371	2.98842	0.00280421	0.0456591	RLIM
ENSG00000102362	1298.53	-0.601762	0.11222	-5.36235	8.21475e-08	8.00649e-06	SYTL4
ENSG00000147206	9001.82	0.558151	0.133982	4.16586	3.1018e-05	0.00130244	NXF3
ENSG00000157514	43.394	1.97372	0.387401	5.09477	3.49168e-07	2.82601e-05	TSC22D3
ENSG00000122122	5950.87	1.10806	0.117313	9.44528	3.54441e-21	2.33594e-18	SASH3
ENSG00000240143	28.1934	2.11729	0.451115	4.69347	2.68614e-06	0.000168156
ENSG00000123728	2184.43	0.550901	0.114626	4.8061	1.53906e-06	0.000108477	RAP2C
ENSG00000165359	2756.59	0.575744	0.132435	4.34738	1.37772e-05	0.000666703	DDX26B
ENSG00000147274	13039.5	0.38778	0.115756	3.34998	0.000808175	0.0186109	RBMX
ENSG00000102081	4113.44	0.312029	0.0926841	3.36658	0.000761056	0.0177026	FMR1
ENSG00000010404	2875.84	0.563261	0.172665	3.26215	0.00110569	0.0240988	IDS
ENSG00000101986	1017.63	0.719231	0.18347	3.92016	8.8491e-05	0.0031403	ABCD1
ENSG00000155962	2494.78	-0.487946	0.151093	-3.22945	0.00124029	0.0258519	CLIC2
ENSG00000124334	3982.94	-0.596177	0.129806	-4.59284	4.37246e-06	0.000246999	IL9R
ENSG00000185275	287.252	-0.837896	0.246687	-3.3966	0.00068229	0.0163939	CD24P4

## Sheet: Fig6D_unique_up
rowname	cluster_str	hgnc_symbol	hgnc_symbol
1	ENSG00000065526	C1	SPEN
2	ENSG00000169991	C1	IFFO2
3	ENSG00000169914	C1	OTUD3
4	ENSG00000000938	C1	FGR
5	ENSG00000126070	C1	AGO3
6	ENSG00000183386	C1	FHL3
7	ENSG00000085832	C1	EPS15
8	ENSG00000152760	C1	TCTEX1D1
9	ENSG00000117528	C1	ABCD3
10	ENSG00000116793	C1	PHTF1
11	ENSG00000143409	C1	FAM63A
12	ENSG00000143614	C1	GATAD2B
13	ENSG00000116539	C1	ASH1L
14	ENSG00000117036	C1	ETV3
15	ENSG00000117523	C1	PRRC2C
16	ENSG00000163486	C1	SRGAP2
17	ENSG00000143772	C1	ITPKB
18	ENSG00000162711	C1	NLRP3
19	ENSG00000099250	C1	NRP1
20	ENSG00000133789	C1	SWAP70
21	ENSG00000078124	C1	ACER3
22	ENSG00000167528	C1	ZNF641
23	ENSG00000161638	C1	ITGA5
24	ENSG00000089094	C1	KDM2B
25	ENSG00000139725	C1	RHOF
26	ENSG00000183495	C1	EP400
27	ENSG00000169926	C1	KLF13
28	ENSG00000173575	C1	CHD2
29	ENSG00000154237	C1	LRRK1
30	ENSG00000188827	C1	SLX4
31	ENSG00000005339	C1	CREBBP
32	ENSG00000157106	C1	SMG1
33	ENSG00000177200	C1	CHD9
34	ENSG00000087253	C1	LPCAT2
35	ENSG00000091592	C1	NLRP1
36	ENSG00000264198	C1
37	ENSG00000161405	C1	IKZF3
38	ENSG00000184640	C1	2009-09-01
39	ENSG00000131196	C1	NFATC1
40	ENSG00000141985	C1	SH3GL1
41	ENSG00000141968	C1	VAV1
42	ENSG00000142303	C1	ADAMTS10
43	ENSG00000105088	C1	OLFM2
44	ENSG00000130479	C1	MAP1S
45	ENSG00000130202	C1	PVRL2
46	ENSG00000105497	C1	ZNF175
47	ENSG00000119778	C1	ATAD2B
48	ENSG00000198399	C1	ITSN2
49	ENSG00000187605	C1	TET3
50	ENSG00000176407	C1	KCMF1
51	ENSG00000196843	C1	ARID5A
52	ENSG00000125633	C1	CCDC93
53	ENSG00000114933	C1	INO80D
54	ENSG00000159128	C1	IFNGR2
55	ENSG00000186716	C1	BCR
56	ENSG00000182944	C1	EWSR1
57	ENSG00000182541	C1	LIMK2
58	ENSG00000100092	C1	SH3BP1
59	ENSG00000172936	C1	MYD88
60	ENSG00000181744	C1	C3orf58
61	ENSG00000189308	C1	LIN54
62	ENSG00000113649	C1	TCERG1
63	ENSG00000146094	C1	DOK3
64	ENSG00000112343	C1	TRIM38
65	ENSG00000164659	C1	KIAA1324L
66	ENSG00000164867	C1	NOS3
67	ENSG00000205268	C1	PDE7A
68	ENSG00000187764	C1	SEMA4D
69	ENSG00000095370	C1	SH2D3C
70	ENSG00000198113	C1	TOR4A
71	ENSG00000157514	C1	TSC22D3
72	ENSG00000242125	C2	SNHG3
73	ENSG00000143167	C2	GPA33
74	ENSG00000231663	C2
75	ENSG00000108021	C2	FAM208B
76	ENSG00000107864	C2	CPEB3
77	ENSG00000132254	C2	ARFIP2
78	ENSG00000068831	C2	RASGRP2
79	ENSG00000110047	C2	EHD1
80	ENSG00000149716	C2	ORAOV1
81	ENSG00000161791	C2	FMNL3
82	ENSG00000170374	C2	SP7
83	ENSG00000130787	C2	HIP1R
84	ENSG00000196498	C2	NCOR2
85	ENSG00000139517	C2	LNX2
86	ENSG00000157227	C2	MMP14
87	ENSG00000197102	C2	DYNC1H1
88	ENSG00000183484	C2	GPR132
89	ENSG00000184916	C2	JAG2
90	ENSG00000259330	C2	LINC00984
91	ENSG00000135723	C2	FHOD1
92	ENSG00000158717	C2	RNF166
93	ENSG00000167522	C2	ANKRD11
94	ENSG00000154016	C2	GRAP
95	ENSG00000108848	C2	LUC7L3
96	ENSG00000265982	C2
97	ENSG00000214176	C2	PLEKHM1P
98	ENSG00000237854	C2	LINC00674
99	ENSG00000170190	C2	SLC16A5
100	ENSG00000167291	C2	TBC1D16
101	ENSG00000262877	C2
102	ENSG00000215421	C2	ZNF407
103	ENSG00000133275	C2	CSNK1G2
104	ENSG00000186111	C2	PIP5K1C
105	ENSG00000267427	C2
106	ENSG00000244165	C2	P2RY11
107	ENSG00000088053	C2	GP6
108	ENSG00000239305	C2	RNF103
109	ENSG00000260742	C2
110	ENSG00000138448	C2	ITGAV
111	ENSG00000144504	C2	ANKMY1
112	ENSG00000124215	C2	CDH26
113	ENSG00000125508	C2	SRMS
114	ENSG00000130589	C2	HELZ2
115	ENSG00000073146	C2	MOV10L1
116	ENSG00000134107	C2	BHLHE40
117	ENSG00000177479	C2	ARIH2
118	ENSG00000010319	C2	SEMA3G
119	ENSG00000163935	C2	SFMBT1
120	ENSG00000136603	C2	SKIL
121	ENSG00000075420	C2	FNDC3B
122	ENSG00000129595	C2	EPB41L4A
123	ENSG00000106089	C2	STX1A
124	ENSG00000221866	C2	PLXNA4
125	ENSG00000048392	C2	RRM2B
126	ENSG00000131669	C2	NINJ1
127	ENSG00000165185	C2	KIAA1958
128	ENSG00000160271	C2	RALGDS
129	ENSG00000180182	C2	MED14
130	ENSG00000240143	C2
131	ENSG00000010404	C2	IDS
132	ENSG00000162522	C1	KIAA1522
133	ENSG00000127603	C1	MACF1
134	ENSG00000133816	C1	MICAL2
135	ENSG00000124942	C1	AHNAK
136	ENSG00000135736	C1	CCDC102A
137	ENSG00000205336	C1	GPR56
138	ENSG00000140931	C1	CMTM3
139	ENSG00000071054	C1	MAP4K4
140	ENSG00000160209	C1	PDXK
141	ENSG00000137198	C1	GMPR
142	ENSG00000111885	C1	MAN1A1
143	ENSG00000106665	C1	CLIP2
144	ENSG00000165025	C1	SYK
145	ENSG00000116560	C1	SFPQ
146	ENSG00000162613	C1	FUBP1
147	ENSG00000162636	C1	FAM102B
148	ENSG00000116815	C1	CD58
149	ENSG00000143149	C1	ALDH9A1
150	ENSG00000162783	C1	IER5
151	ENSG00000136653	C1	RASSF5
152	ENSG00000162889	C1	MAPKAPK2
153	ENSG00000143776	C1	CDC42BPA
154	ENSG00000138182	C1	KIF20B
155	ENSG00000162337	C1	LRP5
156	ENSG00000133703	C1	KRAS
157	ENSG00000174718	C1	KIAA1551
158	ENSG00000111371	C1	SLC38A1
159	ENSG00000187951	C1	ARHGAP11B
160	ENSG00000198826	C1	ARHGAP11A
161	ENSG00000166068	C1	SPRED1
162	ENSG00000103657	C1	HERC1
163	ENSG00000172349	C1	IL16
164	ENSG00000066654	C1	THUMPD1
165	ENSG00000122257	C1	RBBP6
166	ENSG00000153815	C1	CMIP
167	ENSG00000083454	C1	P2RX5
168	ENSG00000132530	C1	XAF1
169	ENSG00000159314	C1	ARHGAP27
170	ENSG00000197971	C1	MBP
171	ENSG00000130254	C1	SAFB2
172	ENSG00000125637	C1	PSD4
173	ENSG00000198586	C1	TLK1
174	ENSG00000132323	C1	ILKAP
175	ENSG00000113396	C1	SLC27A6
176	ENSG00000217128	C1	FNIP1
177	ENSG00000096006	C1	CRISP3
178	ENSG00000146592	C1	CREB5
179	ENSG00000254087	C1	LYN
180	ENSG00000259758	C1	CASC7
181	ENSG00000119314	C1	PTBP3
182	ENSG00000147274	C1	RBMX
183	ENSG00000162695	C2	SLC30A7
184	ENSG00000158715	C2	SLC45A3
185	ENSG00000015171	C2	ZMYND11
186	ENSG00000107863	C2	ARHGAP21
187	ENSG00000166025	C2	AMOTL1
188	ENSG00000110660	C2	SLC35F2
189	ENSG00000060140	C2	STYK1
190	ENSG00000198431	C2	TXNRD1
191	ENSG00000120832	C2	MTERFD3
192	ENSG00000151849	C2	CENPJ
193	ENSG00000136141	C2	LRCH1
194	ENSG00000198604	C2	BAZ1A
195	ENSG00000156206	C2	C15orf26
196	ENSG00000067955	C2	CBFB
197	ENSG00000167182	C2	SP2
198	ENSG00000198369	C2	SPRED2
199	ENSG00000270659	C2
200	ENSG00000130584	C2	ZBTB46
201	ENSG00000100426	C2	ZBED4
202	ENSG00000168374	C2	ARF4
203	ENSG00000081307	C2	UBA5
204	ENSG00000041802	C2	LSG1
205	ENSG00000083312	C2	TNPO1
206	ENSG00000106070	C2	GRB10
207	ENSG00000078674	C2	PCM1
208	ENSG00000165392	C2	WRN
209	ENSG00000198887	C2	SMC5
210	ENSG00000148110	C2	HIATL1
211	ENSG00000198435	C2	NRARP
212	ENSG00000116337	C2	AMPD2
213	ENSG00000073756	C2	PTGS2
214	ENSG00000076356	C2	PLXNA2
215	ENSG00000107968	C2	MAP3K8
216	ENSG00000204176	C2	SYT15
217	ENSG00000107821	C2	KAZALD1
218	ENSG00000166167	C2	BTRC
219	ENSG00000198825	C2	INPP5F
220	ENSG00000184014	C2	DENND5A
221	ENSG00000157570	C2	TSPAN18
222	ENSG00000251562	C2	MALAT1
223	ENSG00000254470	C2	AP5B1
224	ENSG00000172932	C2	ANKRD13D
225	ENSG00000110075	C2	PPP6R3
226	ENSG00000189079	C2	ARID2
227	ENSG00000139218	C2	SCAF11
228	ENSG00000111145	C2	ELK3
229	ENSG00000123066	C2	MED13L
230	ENSG00000152520	C2	PAN3
231	ENSG00000102780	C2	DGKH
232	ENSG00000139679	C2	LPAR6
233	ENSG00000088448	C2	ANKRD10
234	ENSG00000100485	C2	SOS2
235	ENSG00000180008	C2	SOCS4
236	ENSG00000100678	C2	SLC8A3
237	ENSG00000156030	C2	ELMSAN1
238	ENSG00000011114	C2	BTBD7
239	ENSG00000166949	C2	SMAD3
240	ENSG00000102908	C2	NFAT5
241	ENSG00000205047	C2
242	ENSG00000007168	C2	PAFAH1B1
243	ENSG00000174282	C2	ZBTB4
244	ENSG00000262251	C2
245	ENSG00000109046	C2	WSB1
246	ENSG00000185128	C2	TBC1D3F
247	ENSG00000198933	C2	TBKBP1
248	ENSG00000005379	C2	BZRAP1
249	ENSG00000182173	C2	TSEN54
250	ENSG00000260563	C2
251	ENSG00000141562	C2	NARF
252	ENSG00000197961	C2	ZNF121
253	ENSG00000161914	C2	ZNF653
254	ENSG00000267519	C2	MIR24-2
255	ENSG00000142046	C2	TMEM91
256	ENSG00000105722	C2	ERF
257	ENSG00000104936	C2	DMPK
258	ENSG00000068912	C2	ERLEC1
259	ENSG00000153094	C2	BCL2L11
260	ENSG00000153250	C2	RBMS1
261	ENSG00000163092	C2	XIRP2
262	ENSG00000178623	C2	GPR35
263	ENSG00000101096	C2	NFATC2
264	ENSG00000184441	C2
265	ENSG00000180957	C2	PITPNB
266	ENSG00000100276	C2	RASL10A
267	ENSG00000100393	C2	EP300
268	ENSG00000251322	C2	SHANK3
269	ENSG00000162290	C2	DCP1A
270	ENSG00000271856	C2
271	ENSG00000177565	C2	TBL1XR1
272	ENSG00000161202	C2	DVL3
273	ENSG00000122068	C2	FYTTD1
274	ENSG00000125089	C2	SH3TC1
275	ENSG00000038219	C2	BOD1L1
276	ENSG00000084093	C2	REST
277	ENSG00000173542	C2	MOB1B
278	ENSG00000151012	C2	SLC7A11
279	ENSG00000164190	C2	NIPBL
280	ENSG00000155846	C2	PPARGC1B
281	ENSG00000135540	C2	NHSL1
282	ENSG00000112419	C2	PHACTR2
283	ENSG00000130338	C2	TULP4
284	ENSG00000182095	C2	TNRC18
285	ENSG00000236609	C2	ZNF853
286	ENSG00000273014	C2
287	ENSG00000106609	C2	TMEM248
288	ENSG00000055609	C2	KMT2C
289	ENSG00000184863	C2	RBM33
290	ENSG00000105983	C2	LMBR1
291	ENSG00000146909	C2	NOM1
292	ENSG00000104388	C2	RAB2A
293	ENSG00000136813	C2	KIAA0368
294	ENSG00000261094	C2
295	ENSG00000130723	C2	PRRC2B
296	ENSG00000102057	C2	KCND1
297	ENSG00000186767	C2	SPIN4
298	ENSG00000196338	C2	NLGN3
299	ENSG00000131263	C2	RLIM
300	ENSG00000165359	C2	DDX26B
301	ENSG00000102081	C2	FMR1
302	ENSG00000213047	C2	DENND1B
303	ENSG00000178462	C2	TUBAL3
304	ENSG00000171988	C2	JMJD1C
305	ENSG00000108219	C2	TSPAN14
306	ENSG00000165886	C2	UBTD1
307	ENSG00000151893	C2	CACUL1
308	ENSG00000166689	C2	PLEKHA7
309	ENSG00000110422	C2	HIPK3
310	ENSG00000085117	C2	CD82
311	ENSG00000085741	C2	WNT11
312	ENSG00000110395	C2	CBL
313	ENSG00000079337	C2	RAPGEF3
314	ENSG00000151835	C2	SACS
315	ENSG00000102572	C2	STK24
316	ENSG00000100523	C2	DDHD1
317	ENSG00000185650	C2	ZFP36L1
318	ENSG00000197879	C2	MYO1C
319	ENSG00000180626	C2	ZNF594
320	ENSG00000065989	C2	PDE4A
321	ENSG00000115607	C2	IL18RAP
322	ENSG00000116106	C2	EPHA4
323	ENSG00000125827	C2	TMX4
324	ENSG00000078747	C2	ITCH
325	ENSG00000124145	C2	SDC4
326	ENSG00000260708	C2
327	ENSG00000088726	C2	TMEM40
328	ENSG00000082701	C2	GSK3B
329	ENSG00000109787	C2	KLF3
330	ENSG00000134352	C2	IL6ST
331	ENSG00000130449	C2	ZSWIM6
332	ENSG00000173930	C2	SLCO4C1
333	ENSG00000164211	C2	STARD4
334	ENSG00000129625	C2	REEP5
335	ENSG00000146083	C2	RNF44
336	ENSG00000180822	C2	PSMG4
337	ENSG00000205269	C2	TMEM170B
338	ENSG00000112379	C2	KIAA1244
339	ENSG00000228649	C2
340	ENSG00000006576	C2	PHTF2
341	ENSG00000158528	C2	PPP1R9A
342	ENSG00000197093	C2	GAL3ST4
343	ENSG00000128567	C2	PODXL
344	ENSG00000186480	C2	INSIG1
345	ENSG00000066777	C2	ARFGEF1
346	ENSG00000164684	C2	ZNF704
347	ENSG00000164924	C2	YWHAZ
348	ENSG00000148158	C2	SNX30
349	ENSG00000124486	C2	USP9X
350	ENSG00000102221	C2	JADE3
351	ENSG00000101986	C2	ABCD1
352	ENSG00000158711	C1	ELK4
353	ENSG00000095787	C1	WAC
354	ENSG00000166272	C1	WBP1L
355	ENSG00000198873	C1	GRK5
356	ENSG00000060749	C1	QSER1
357	ENSG00000168003	C1	SLC3A2
358	ENSG00000110721	C1	CHKA
359	ENSG00000165458	C1	INPPL1
360	ENSG00000137504	C1	CREBZF
361	ENSG00000167548	C1	KMT2D
362	ENSG00000092148	C1	HECTD1
363	ENSG00000183828	C1	NUDT14
364	ENSG00000169330	C1	KIAA1024
365	ENSG00000140859	C1	KIFC3
366	ENSG00000205250	C1	E2F4
367	ENSG00000103257	C1	SLC7A5
368	ENSG00000158805	C1	ZNF276
369	ENSG00000256525	C1	POLG2
370	ENSG00000171634	C1	BPTF
371	ENSG00000078043	C1	PIAS2
372	ENSG00000132005	C1	RFX1
373	ENSG00000064547	C1	LPAR2
374	ENSG00000130201	C1	EXOC3L2
375	ENSG00000055917	C1	PUM2
376	ENSG00000119737	C1	GPR75
377	ENSG00000243156	C1	MICAL3
378	ENSG00000154767	C1	XPC
379	ENSG00000178732	C1	GP5
380	ENSG00000164327	C1	RICTOR
381	ENSG00000272341	C1
382	ENSG00000055208	C1	TAB2
383	ENSG00000105939	C1	ZC3HAV1
384	ENSG00000158941	C1	CCAR2
385	ENSG00000155090	C1	KLF10
386	ENSG00000106868	C1	SUSD1
387	ENSG00000119408	C1	NEK6
388	ENSG00000196550	C2	FAM72A
389	ENSG00000117724	C2	CENPF
390	ENSG00000129534	C2	MIS18BP1
391	ENSG00000087586	C2	AURKA
392	ENSG00000153179	C2	RASSF3
393	ENSG00000174106	C2	LEMD3
394	ENSG00000139793	C2	MBNL2
395	ENSG00000154845	C2	PPP4R1
396	ENSG00000105612	C2	DNASE2
397	ENSG00000003402	C2	CFLAR
398	ENSG00000125898	C2	FAM110A
399	ENSG00000133657	C2	ATP13A3
400	ENSG00000168421	C2	RHOH
401	ENSG00000220517	C2	ASS1P1
402	ENSG00000075618	C2	FSCN1

## Sheet: Fig6D_unique_down
rowname	cluster_str	hgnc_symbol
1	ENSG00000177000	C1	MTHFR
2	ENSG00000219481	C1	NBPF1
3	ENSG00000142687	C1	KIAA0319L
4	ENSG00000215883	C1	CYB5RL
5	ENSG00000137944	C1	CCBL2
6	ENSG00000158793	C1	NIT1
7	ENSG00000116711	C1	PLA2G4A
8	ENSG00000159348	C1	CYB5R1
9	ENSG00000133069	C1	TMCC2
10	ENSG00000203685	C1	C1orf95
11	ENSG00000166900	C1	STX3
12	ENSG00000014138	C1	POLA2
13	ENSG00000158483	C1	FAM86C1
14	ENSG00000175567	C1	UCP2
15	ENSG00000172572	C1	PDE3A
16	ENSG00000111726	C1	CMAS
17	ENSG00000123191	C1	ATP7B
18	ENSG00000182511	C1	FES
19	ENSG00000118894	C1	FAM86A
20	ENSG00000103319	C1	EEF2K
21	ENSG00000103502	C1	CDIPT
22	ENSG00000159792	C1	PSKH1
23	ENSG00000108528	C1	SLC25A11
24	ENSG00000176974	C1	SHMT1
25	ENSG00000108439	C1	PNPO
26	ENSG00000173894	C1	CBX2
27	ENSG00000099875	C1	MKNK2
28	ENSG00000187994	C1	RINL
29	ENSG00000170684	C1	ZNF296
30	ENSG00000160469	C1	BRSK1
31	ENSG00000138073	C1	PREB
32	ENSG00000068784	C1	SRBD1
33	ENSG00000115641	C1	FHL2
34	ENSG00000064933	C1	PMS1
35	ENSG00000003393	C1	ALS2
36	ENSG00000144591	C1	GMPPA
37	ENSG00000146205	C1	ANO7
38	ENSG00000062598	C1	ELMO2
39	ENSG00000114026	C1	OGG1
40	ENSG00000156990	C1	RPUSD3
41	ENSG00000145088	C1	EAF2
42	ENSG00000179348	C1	GATA2
43	ENSG00000109814	C1	UGDH
44	ENSG00000150756	C1	FAM173B
45	ENSG00000081189	C1	MEF2C
46	ENSG00000026950	C1	BTN3A1
47	ENSG00000204371	C1	EHMT2
48	ENSG00000112039	C1	FANCE
49	ENSG00000086289	C1	EPDR1
50	ENSG00000106034	C1	CPED1
51	ENSG00000155926	C1	SLA
52	ENSG00000148019	C1	CEP78
53	ENSG00000136840	C1	ST6GALNAC4
54	ENSG00000185275	C1	CD24P4
55	ENSG00000157191	C2	NECAP2
56	ENSG00000198574	C2	SH2D1B
57	ENSG00000117139	C2	KDM5B
58	ENSG00000119977	C2	TCTN3
59	ENSG00000176171	C2	BNIP3
60	ENSG00000260629	C2
61	ENSG00000149798	C2	CDC42EP2
62	ENSG00000132749	C2	MTL5
63	ENSG00000139187	C2	KLRG1
64	ENSG00000133103	C2	COG6
65	ENSG00000152193	C2	RNF219
66	ENSG00000102524	C2	TNFSF13B
67	ENSG00000136319	C2	TTC5
68	ENSG00000185070	C2	FLRT2
69	ENSG00000198794	C2	SCAMP5
70	ENSG00000183978	C2	COA3
71	ENSG00000091947	C2	TMEM101
72	ENSG00000132002	C2	DNAJB1
73	ENSG00000160113	C2	NR2F6
74	ENSG00000254858	C2	MPV17L2
75	ENSG00000130517	C2	PGPEP1
76	ENSG00000079435	C2	LIPE
77	ENSG00000152253	C2	SPC25
78	ENSG00000185808	C2	PIGP
79	ENSG00000273311	C2	DGCR11
80	ENSG00000100104	C2	SRRD
81	ENSG00000167074	C2	TEF
82	ENSG00000198585	C2	NUDT16
83	ENSG00000113790	C2	EHHADH
84	ENSG00000173597	C2	SULT1B1
85	ENSG00000197465	C2	GYPE
86	ENSG00000151729	C2	SLC25A4
87	ENSG00000164347	C2	GFM2
88	ENSG00000152348	C2	ATG10
89	ENSG00000112195	C2	TREML2
90	ENSG00000216775	C2
91	ENSG00000164818	C2	HEATR2
92	ENSG00000188352	C2	FOCAD
93	ENSG00000164978	C2	NUDT2
94	ENSG00000164967	C2	RPP25L
95	ENSG00000148219	C2	ASTN2
96	ENSG00000119421	C2	NDUFA8
97	ENSG00000088280	C2	ASAP3
98	ENSG00000162739	C2	SLAMF6
99	ENSG00000117091	C2	CD48
100	ENSG00000182795	C2	C1orf116
101	ENSG00000143751	C2	SDE2
102	ENSG00000152465	C2	NMT2
103	ENSG00000109881	C2	CCDC34
104	ENSG00000111652	C2	COPS7A
105	ENSG00000110876	C2	SELPLG
106	ENSG00000197119	C2	SLC25A29
107	ENSG00000172794	C2	RAB37
108	ENSG00000163072	C2	NOSTRIN
109	ENSG00000144357	C2	UBR3
110	ENSG00000156253	C2	RWDD2B
111	ENSG00000128340	C2	RAC2
112	ENSG00000114107	C2	CEP70
113	ENSG00000163898	C2	LIPH
114	ENSG00000170846	C2
115	ENSG00000090989	C2	EXOC1
116	ENSG00000138650	C2	PCDH10
117	ENSG00000250361	C2	GYPB
118	ENSG00000184349	C2	EFNA5
119	ENSG00000170271	C2	FAXDC2
120	ENSG00000124535	C2	WRNIP1
121	ENSG00000112304	C2	ACOT13
122	ENSG00000204386	C2	NEU1
123	ENSG00000137216	C2	TMEM63B
124	ENSG00000112367	C2	FIG4
125	ENSG00000178425	C2	NT5DC1
126	ENSG00000008277	C2	ADAM22
127	ENSG00000121039	C2	RDH10
128	ENSG00000117305	C1	HMGCL
129	ENSG00000163866	C1	SMIM12
130	ENSG00000163154	C1	TNFAIP8L2
131	ENSG00000182134	C1	TDRKH
132	ENSG00000116668	C1	SWT1
133	ENSG00000184508	C1	HDDC3
134	ENSG00000007312	C1	CD79B
135	ENSG00000118961	C1	C2orf43
136	ENSG00000159228	C1	CBR1
137	ENSG00000183250	C1	C21orf67
138	ENSG00000185614	C1	FAM212A
139	ENSG00000075651	C1	PLD1
140	ENSG00000183137	C1	CEP57L1
141	ENSG00000273477	C1
142	ENSG00000104524	C1	PYCRL
143	ENSG00000164946	C1	FREM1
144	ENSG00000172731	C1	LRRC20
145	ENSG00000149516	C1	MS4A3
146	ENSG00000174669	C1	SLC29A2
147	ENSG00000150991	C1	UBC
148	ENSG00000100804	C1	PSMB5
149	ENSG00000258486	C1	RN7SL1
150	ENSG00000265150	C1	RN7SL2
151	ENSG00000185504	C1	C17orf70
152	ENSG00000262814	C1	MRPL12
153	ENSG00000185813	C1	PCYT2
154	ENSG00000064490	C1	RFXANK
155	ENSG00000161277	C1	THAP8
156	ENSG00000104983	C1	CCDC61
157	ENSG00000130748	C1	TMEM160
158	ENSG00000063176	C1	SPHK2
159	ENSG00000010361	C1	FUZ
160	ENSG00000132394	C1	EEFSEC
161	ENSG00000260273	C1
162	ENSG00000167700	C1	MFSD3
163	ENSG00000151445	C2	VIPAS39
164	ENSG00000141577	C2	AZI1
165	ENSG00000105376	C2	ICAM5
166	ENSG00000123815	C2	ADCK4
167	ENSG00000168936	C2	TMEM129
168	ENSG00000151623	C2	NR3C2
169	ENSG00000124574	C2	ABCC10
170	ENSG00000177409	C2	SAMD9L
171	ENSG00000198917	C2	C9orf114
