# Supplementary material for: Cohesin mutations are synthetic lethal with stimulation of WNT signaling
Source: eLife journal article supplement (doi:10.7554/elife.61405), 2020-12-07

**A***RAD21*<sup>+/-</sup> clone 2

| Primers |           | Clone 1                               |
|---------|-----------|---------------------------------------|
| P1F/P1R | reference | TGCCGATTGAAGCCGAG                     |
|         | Allele 1  | TGCCGATTGAAGC - GAG                   |
|         | Allele 2  | ?                                     |
| P1F/P2R | reference | ATCCTGCCGATTGAA ***** GTTTTCCCGTTTGTA |
|         | Allele 3  | ATCCTGCCGATTGAA GTTTTCCCGTTTGTA       |

*SMC3*<sup>+/-</sup> clone 2

| Primers |           | Clone 1                        |
|---------|-----------|--------------------------------|
| P1F/P1R | reference | AGGGGCCCGGAATCATG              |
|         | Allele 1  | AGGGGCTCGGAATCATG              |
|         | Allele 2  | TTCCAGGCCAGGG ***** CCAGGAACTG |
| P1F/P2R | reference | TTCCAGGCCAGGG CCAGGAACTG       |

**C****mRNA**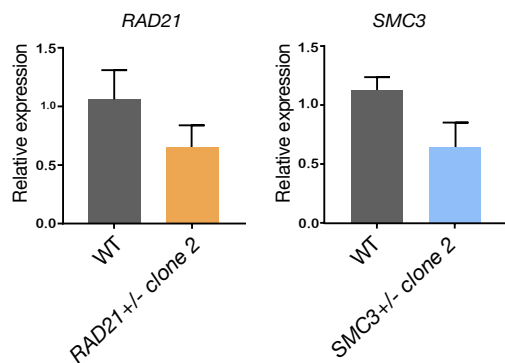**B**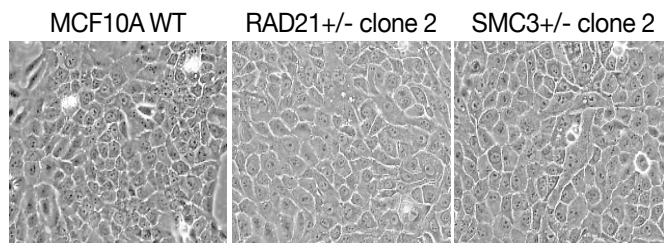**D**

Complete loss  
Partial loss  
Normal

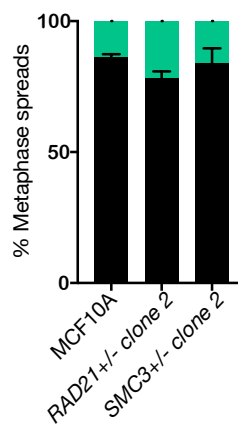**E****Trypan blue**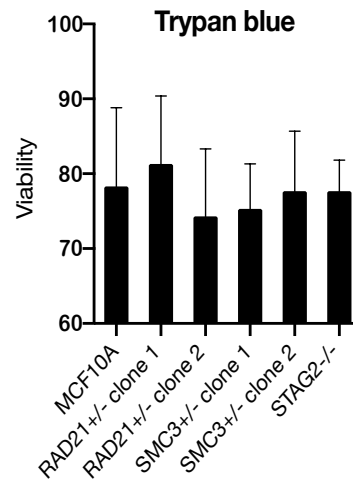**F**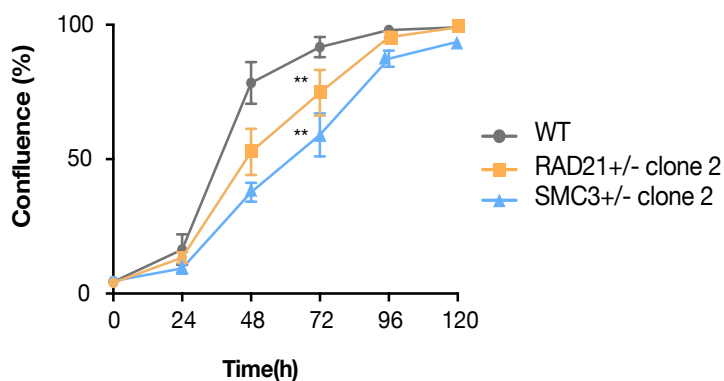**G**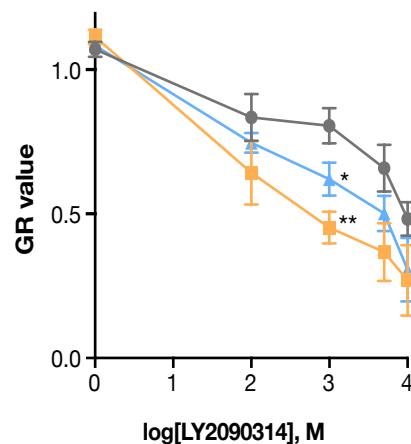

Supplement: supp [file elife_poa_e61405_Figure_3_figure_supplement_3.pdf › elife_poa_e61405_Figure_3_figure_supplement_3.pdf]
