# Supplementary material for: Cohesin mutations are synthetic lethal with stimulation of WNT signaling
Source: eLife journal article supplement (doi:10.7554/elife.61405), 2020-12-07
Supplement: supp [file elife_poa_e61405_Figure_5_source_data_1.pdf › elife_poa_e61405_Figure_5_source_data_1.pdf]

## Figure 4 - Source Data 1

Chameleon Duo Stain

Protein ladder

200 kDa

160 kDa

125 kDa

90 kDa

70 kDa

pbeta-catenin (Ser33/37/Thr41) - 92 kDa

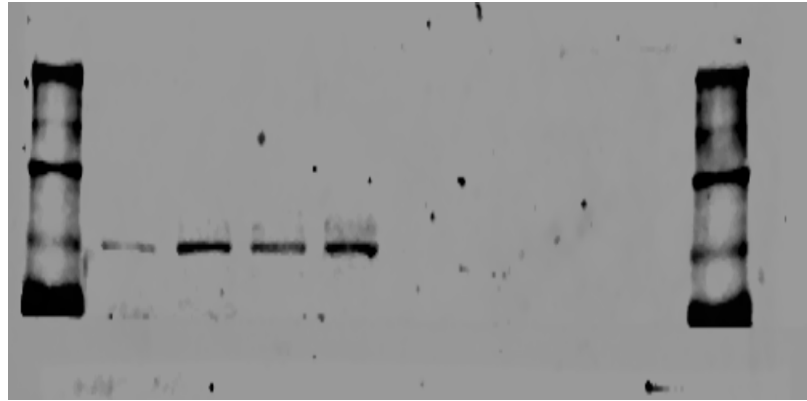

Figure 4A (top)

Total beta-catenin - 92 kDa

90 kDa  
(reprobe)

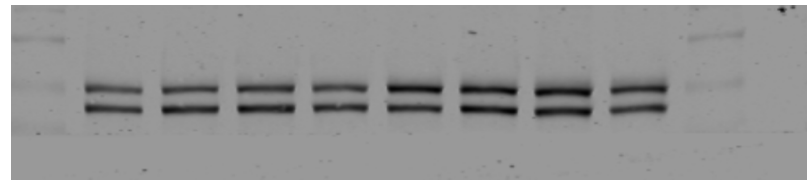

Figure 4A (middle)

Gamma-tubulin - 52 kDa

50 kDa

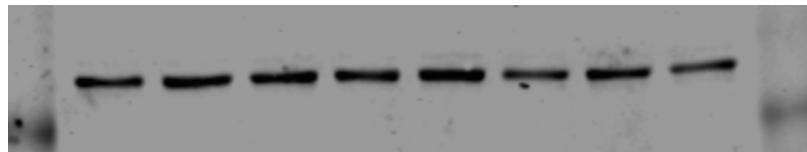

Figure 4A (bottom)

Chameleon Duo Stain

Protein ladder

200 kDa

160 kDa

125 kDa

90 kDa

70 kDa

pbeta-catenin (Ser675) - 92 kDa

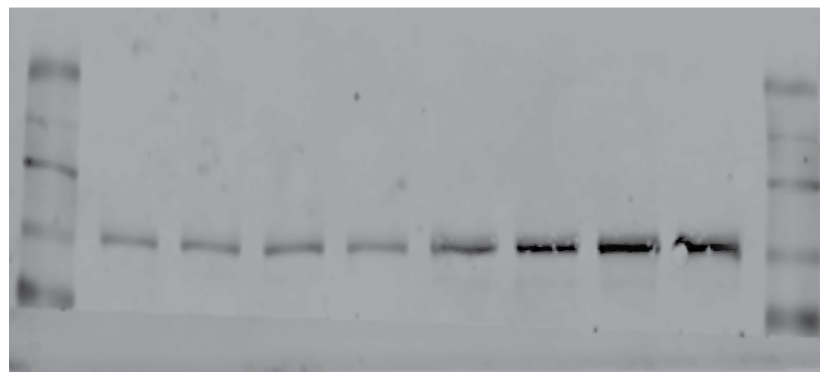

Figure 4B (top)

Total beta-catenin - 92 kDa

90 kDa  
(reprobe)

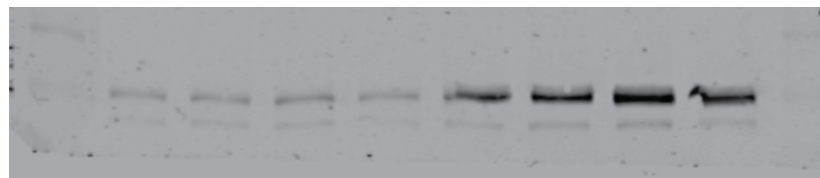

Figure 4B (middle)

Gamma-tubulin - 52 kDa

50 kDa

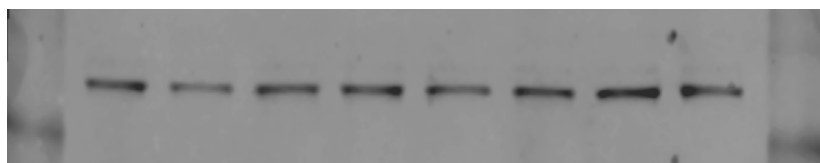

Figure 4B (bottom)
