# Supplementary material for: Cohesin mutations are synthetic lethal with stimulation of WNT signaling
Source: eLife journal article supplement (doi:10.7554/elife.61405), 2020-12-07
Supplement: supp [file elife_poa_e61405_Figure_5_source_data_4.pdf › elife_poa_e61405_Figure_5_source_data_4.pdf]

## Figure 4 - Source Data 4

pβ-catenin (Ser33/37/Thr41) - 92 kDa

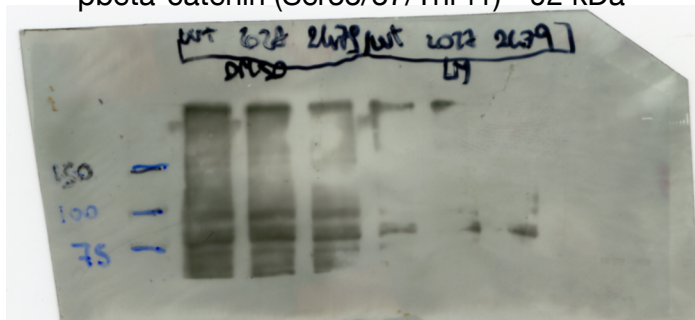

**Figure 4S2A (top)**

Total β-catenin - 92 kDa

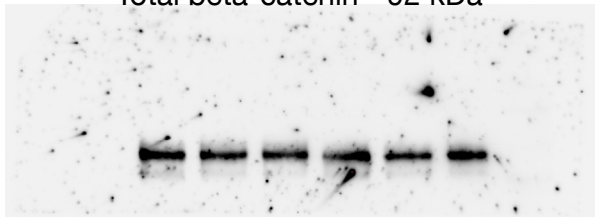

**Figure 4S2A (middle)**

γ-tubulin - 52 kDa

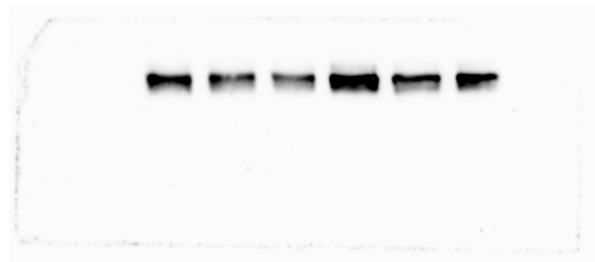

**Figure 4S2A (bottom)**

pβ-catenin (Ser675) - 92 kDa

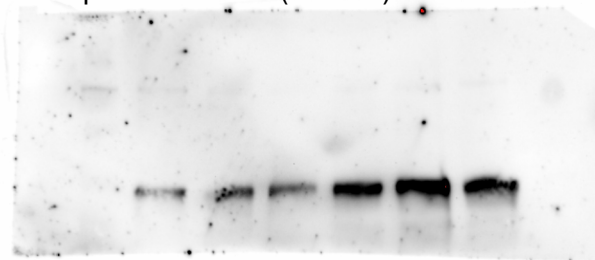

**Figure 4S2B (top)**

Total β-catenin - 92 kDa

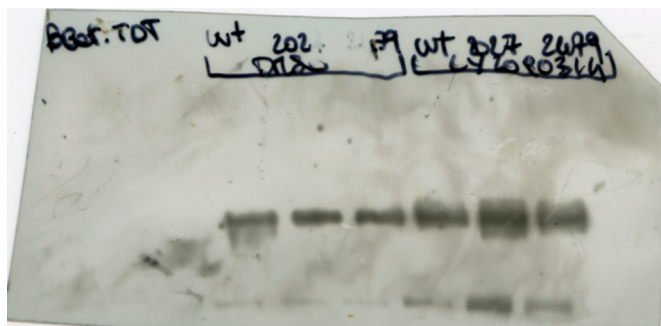

**Figure 4S2B (middle)**

γ-tubulin - 52 kDa

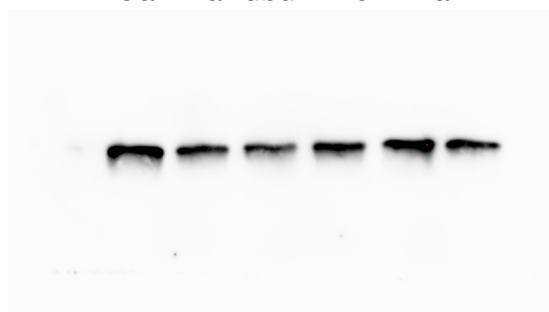

**Figure 4S2B (bottom)**
