# Supplementary material for: Cohesin mutations are synthetic lethal with stimulation of WNT signaling
Source: eLife. 2020 Dec 7;9:e61405. doi: 10.7554/eLife.61405 (PMC7746233; doi:10.7554/eLife.61405)
Supplement: Table 1—source data 1. [file elife-61405-table1-data1.xlsx]

## Sheet: Table1SourceData1
	AOC value
MCF10A '1,7-DIDEACETOXY-1,7-DIOXO-3-DEACETYLKHIVORIN'	-0.102006
MCF10A '18-AMINOABIETA-8,11,13-TRIENE SULFATE'	-0.0546636
MCF10A '1S,2R-PHENYLPROPANOLAMINE HYDROCHLORIDE'	-0.0275237
MCF10A '2,3-DIMERCAPTOSUCCINIC ACID'	-0.0438197
MCF10A '4,6-DIMETHOXY-5-METHYLISOFLAVONE'	0.0638155
MCF10A '5,2-DIMETHOXYFLAVONE'	-0.00759278
MCF10A '6-(3,4-METHYLENEDIOXYSTYRYL)-alpha-PYRONE'	-0.0927163
MCF10A 'ABSCISIC ACID (cis,trans; +/-)'	0.120921
MCF10A 'BETAMETHASONE 17,21-DIPROPIONATE'	0.0801491
MCF10A 'DUARTIN, DIMETHYL ETHER'	-0.0406491
MCF10A 'ESTRADIOL-3-SULFATE, SODIUM SALT'	0.000430648
MCF10A 'HETEROPEUCENIN, METHYL ETHER'	-0.027095
MCF10A 'KOPARIN 2,3-DIMETHYL ETHER'	-0.0642962
MCF10A 1-(2-METHOXYPHENYL)PIERAZINE HYDROCHLORIDE	0.0100176
MCF10A 1-MONOPALMITIN	-0.0691333
MCF10A 2-MERCAPTOETHANOL	0.121676
MCF10A 3-AMINOPROPIONITRILE FUMARATE	-0.0530123
MCF10A 3-HYDROXY-4-(SUCCIN-2-YL)-CARYOLANE delta-LACTONE	-0.00613738
MCF10A 3-HYDROXYBENZYLHYDRAZINE DIHYDROCHLORIDE	0.0222253
MCF10A 3-METHOXYCATECHOL	-0.0540485
MCF10A 3-METHYLORSELLINIC ACID	-0.0372329
MCF10A 3-OXOURSAN(28-13)OLIDE	0.0797891
MCF10A 4-(3-BUTOXY-4-METHOXYBENZYL)IMIDAZOLIDIN-2-ONE	-0.0458313
MCF10A 4-DEMETHYLEPICROPODOPHYLLOTOXIN	0.424187
MCF10A 5-CHLOROINDOLE-2-CARBOXYLIC ACID	-0.0558705
MCF10A 7-DEACETOXY-7-OXOKHIVORIN	-0.0116076
MCF10A 7-DEACETYLKHIVORIN	-0.0188748
MCF10A ACARBOSE	-0.0210575
MCF10A ACEDAPSONE	0.0269069
MCF10A ACEGLUTAMIDE	-0.022055
MCF10A ACEMETACIN	-0.0766972
MCF10A ACEPROMAZINE MALEATE	0.0208221
MCF10A ACETARSOL	-0.100632
MCF10A ACONITIC ACID	-0.063283
MCF10A ACTINOQUINOL SODIUM	-0.0917487
MCF10A ADIPHENINE HYDROCHLORIDE	0.0130702
MCF10A AJMALINE	-0.0508516
MCF10A AKLOMIDE	0.0291835
MCF10A ALFUZOSIN HYDROCHLORIDE	-0.0434508
MCF10A ALMOTRIPTAN	0.0118367
MCF10A alpha-CYANO-3-HYDROXYCINNAMIC ACID	-0.0656374
MCF10A alpha-MANGOSTIN	-0.0254972
MCF10A ALPINETIN METHYL ETHER	0.0826542
MCF10A ALPRENOLOL HYDROCHLORIDE	0.0112174
MCF10A ALRESTATIN	-0.0227077
MCF10A ALTRETAMINE	-0.0365392
MCF10A AMIFOSTINE	0.122799
MCF10A AMIKACIN HYDRATE	-0.0317063
MCF10A AMINOETHYLISOTHIOUREA DIHYDROBROMIDE	-0.0945758
MCF10A AMINOHIPPURIC ACID	-0.0251708
MCF10A AMINOPYRINE	-0.0182137
MCF10A AMIODARONE HYDROCHLORIDE	-0.0585375
MCF10A AMITRAZ	0.0126094
MCF10A AMLODIPINE BESYLATE	-0.00568997
MCF10A AMMONIUM LACTATE	-0.0469849
MCF10A ANGOLENSIN (R)	-0.00313581
MCF10A ANISINDIONE	-0.0444518
MCF10A ANTIAROL	-0.0313372
MCF10A APRAMYCIN SULFATE	0.16862
MCF10A ARACHIDONIC ACID	0.00735951
MCF10A ARTESUNATE	-0.0457398
MCF10A ARTHONIOIC ACID	-0.0277857
MCF10A ASCORBIC ACID	-0.0807228
MCF10A ASPARTAME	-0.00284617
MCF10A ASTEMIZOLE	0.00544376
MCF10A ATOMOXETINE HYDROCHLORIDE	-0.0802806
MCF10A AURIN TRICARBOXYLIC ACID	-0.0575553
MCF10A AVANAFIL	-0.0173146
MCF10A AZACITIDINE	0.284968
MCF10A AZASERINE	-0.0735279
MCF10A AZELASTINE HYDROCHLORIDE	-0.02621
MCF10A AZLOCILLIN SODIUM	0.0142726
MCF10A BACAMPICILLIN HYDROCHLORIDE	-0.0315901
MCF10A BECLAMIDE	-0.00816609
MCF10A BEMOTRIZINOL	-0.0490161
MCF10A BENDROFLUMETHIAZIDE	-0.00210521
MCF10A BENFLUOREX HYDROCHLORIDE	-0.054842
MCF10A BENFOTIAMINE	-0.0801852
MCF10A BENOXINATE HYDROCHLORIDE	-0.12882
MCF10A BENZOIC ACID	-0.0500212
MCF10A BENZOYL PEROXIDE	-0.0648573
MCF10A BENZYL BENZOATE	-0.0129113
MCF10A BEPRIDIL HYDROCHLORIDE	-0.049168
MCF10A BERBERINE CHLORIDE	0.0238797
MCF10A BERGAPTEN	-0.0488679
MCF10A BETAINE HYDROCHLORIDE	0.021671
MCF10A BETAXALOL HYDROCHLORIDE	-0.0399471
MCF10A BEZAFIBRATE	-0.0256586
MCF10A BICUCULLINE (+)	-0.00285121
MCF10A BIFONAZOLE	0.016289
MCF10A BILIRUBIN	0.0165644
MCF10A BIOTIN	-0.0447466
MCF10A BRETYLIUM TOSYLATE	-0.0845913
MCF10A BRINZOLAMIDE	0.0362179
MCF10A BROMHEXINE HYDROCHLORIDE	0.0160548
MCF10A BROXYQUINOLINE	0.112095
MCF10A BRUCINE	-0.0016417
MCF10A BUFLOMEDIL HYDROCHLORIDE	-0.0493967
MCF10A BUMETANIDE	-0.0308943
MCF10A BUTYLATED HYDROXYTOLUENE	0.0243658
MCF10A CADAVERINE TARTRATE	-0.0459484
MCF10A CAMYLOFINE DIHYDROCHLORIDE	-0.00396608
MCF10A CANRENONE	0.0316912
MCF10A CARAPIN	-0.0293729
MCF10A CARBADOX	-0.0229648
MCF10A CARBENOXOLONE SODIUM	-0.0760536
MCF10A CARBIDOPA	-0.0245227
MCF10A CARNITINE (dl) HYDROCHLORIDE	-0.0277309
MCF10A CARPROFEN	-0.0655209
MCF10A CASANTHRANOL [cascaroside A shown]	-0.0387147
MCF10A CATECHIN PENTAACETATE	-0.043073
MCF10A CEFALONIUM	-0.0773475
MCF10A CEFAMANDOLE NAFATE	-0.0821293
MCF10A CEFAMANDOLE SODIUM	-0.0465303
MCF10A CEFDINIR	-0.0732616
MCF10A CEFDITORIN PIVOXIL	0.00350015
MCF10A CEFEPIME HYDROCHLORIDE	-0.0421531
MCF10A CEFMENOXIME HYDROCHLORIDE	-0.0228216
MCF10A CEFMETAZOLE SODIUM	-0.0139157
MCF10A CEFONICID SODIUM	-0.00900806
MCF10A CEFOPERAZONE	-0.0457112
MCF10A CEFORANIDE	-0.0333233
MCF10A CEFOTETAN	-0.0878157
MCF10A CEFOXITIN SODIUM	-0.0465441
MCF10A CEFPROZIL	-0.00322966
MCF10A CEFTIBUTEN	0.024056
MCF10A CEFTRIAXONE SODIUM TRIHYDRATE	-0.0322946
MCF10A CEFUROXIME SODIUM	0.0306246
MCF10A CELLOBIOSE (D[+])	-0.0442918
MCF10A CEPHALEXIN	-0.0625838
MCF10A CEPHALOSPORIN C Zn	-0.0534882
MCF10A CETIRIZINE HYDROCHLORIDE	-0.00436373
MCF10A CHLORMADINONE ACETATE	0.139844
MCF10A CHLOROPYRAMINE HYDROCHLORIDE	-0.0975756
MCF10A CHLOROXINE	-0.00794634
MCF10A CHLORPROTHIXENE HYDROCHLORIDE	0.0203153
MCF10A CHLORPYRIFOS	-0.132893
MCF10A CHLORQUINALDOL	0.0194348
MCF10A CILOSTAZOL	0.0101455
MCF10A CINCHONIDINE	-0.0471073
MCF10A CINCHONINE	-0.0715389
MCF10A CINNARAZINE	0.0143049
MCF10A CINROMIDE	-0.0299176
MCF10A CINTRIAMIDE	-0.0224036
MCF10A CIPROFIBRATE	-0.0592299
MCF10A CLEMIZOLE HYDROCHLORIDE	-0.0206463
MCF10A CLINAFOXACIN HYDROCHLORIDE	-0.0434727
MCF10A CLOFIBRIC ACID	-0.0299541
MCF10A CLONAZEPAM	-0.0217197
MCF10A CLOPIDOL	0.1169
MCF10A COUMOPHOS	-0.0137728
MCF10A CREATININE	-0.0453978
MCF10A CROTAMITON	-0.0285492
MCF10A CUELURE	-0.012879
MCF10A CYCLOBENZAPRINE HYDROCHLORIDE	0.0162899
MCF10A CYCLOHEXIMIDE	0.328176
MCF10A CYCLOSPORINE	-0.0218659
MCF10A CYROMAZINE	-0.0461339
MCF10A CYTIDINE TRIPHOSPHATE DISODIUM	0.120171
MCF10A D-PHENYLALANINE	-0.0396532
MCF10A DACTINOMYCIN	0.786647
MCF10A DANTROLENE SODIUM	-0.0212925
MCF10A DAPAGLIFLOZIN	-0.00745519
MCF10A DEACETOXY-7-OXOGEDUNIN	-0.0951147
MCF10A DEBRISOQUIN SULFATE	-0.0212195
MCF10A DEGUELIN(-)	0.0269329
MCF10A DEHYDROABIETAMIDE	0.0196195
MCF10A DEHYDROACETIC ACID	-0.114454
MCF10A DEHYDRODIHYDROROTENONE	-0.0730412
MCF10A DEHYDROROTENONE	-0.0924049
MCF10A DERACOXIB	-0.00531104
MCF10A DEXTROAMPHETAMINE SULFATE	-0.0346869
MCF10A DIBEKACIN	0.0165864
MCF10A DICHLORISONE ACETATE	-0.0660926
MCF10A DICHLOROPHEN	0.0751515
MCF10A DICLORALUREA	-0.126478
MCF10A DIETHYLTOLUAMIDE	-0.0325311
MCF10A DIFFRACTAIC ACID	-0.0433351
MCF10A DIFLORASONE DIACETATE	0.080632
MCF10A DIFLUBENZURON	-0.00243701
MCF10A DIHYDROCELASTRYL DIACETATE	-0.063929
MCF10A DIHYDROFISSINOLIDE	-0.0511739
MCF10A DIHYDROGEDUNIN	-0.0367103
MCF10A DOXORUBICIN	-0.0558027
MCF10A DROFENINE HYDROCHLORIDE	0.0123853
MCF10A DRONEDARONE HYDROCHLORIDE	0.06405
MCF10A DROPROPIZINE	-0.0445419
MCF10A DULOXETINE HYDROCHLORIDE	-0.0430535
MCF10A ECONAZOLE NITRATE	-0.0392795
MCF10A EDITOL	-0.0540819
MCF10A EDOXUDINE	0.0797283
MCF10A ELETRIPTAN HYDROBROMIDE	-0.0175917
MCF10A ENALAPRIL MALEATE	-0.0270656
MCF10A ENOXACIN	0.00641444
MCF10A ENTANDROPHRAGMIN	0.00417868
MCF10A EPIGALLOCATECHIN-3-MONOGALLATE	0.0559056
MCF10A ERYTHROMYCIN ESTOLATE	-0.0289105
MCF10A ERYTHROMYCIN STEARATE	-0.00345844
MCF10A ESCITALOPRAM OXALATE	0.0688538
MCF10A ESTRADIOL ACETATE	-0.0142761
MCF10A ESTRADIOL BENZOATE	-0.0247356
MCF10A ESTRAMUSTINE	-0.0750754
MCF10A ETHANOLAMINE OLEATE	0.0175274
MCF10A ETHAVERINE HYDROCHLORIDE	-0.0122122
MCF10A ETHISTERONE	-0.00749514
MCF10A ETHOSUXIMIDE	-0.048976
MCF10A ETHYL PARABEN	0.0109637
MCF10A ETHYL VANILLIN	0.00635321
MCF10A ETIDRONATE DISODIUM	-0.134913
MCF10A EZETIMIBE	0.0311646
MCF10A FAMCICLOVIR	-0.0464725
MCF10A FAMPROFAZONE	-0.000315083
MCF10A FENBUTYRAMIDE	-0.0380968
MCF10A FENDILINE HYDROCHLORIDE	0.0103036
MCF10A FENTHION	-0.087851
MCF10A FIROCOXIB	-0.0423899
MCF10A FLOPROPIONE	-0.00596826
MCF10A FLOXURIDINE	0.260061
MCF10A FLUMETHASONE	-0.0188521
MCF10A FLUNISOLIDE	0.0442049
MCF10A FLURANDRENOLIDE	0.00650939
MCF10A FLUROXENE	-0.00901219
MCF10A FLUVASTATIN SODIUM	-0.00191345
MCF10A FOMEPIZOLE	-0.0402714
MCF10A FOSCARNET SODIUM	-0.0572285
MCF10A FOSFOMYCIN CALCIUM	-0.00794022
MCF10A FUCOSTANOL	0.0263198
MCF10A GALANTAMINE	-0.028846
MCF10A gamma-AMINOBUTYRIC ACID HYDROCHLORIDE	-0.0298643
MCF10A GARLICIN	-0.0944917
MCF10A GITOXIGENIN	-0.0448392
MCF10A GITOXIGENIN DIACETATE	0.210356
MCF10A GLAFENINE	-0.140147
MCF10A GLUCONOLACTONE	-0.0814584
MCF10A GLYCYLGLYCINE	-0.0293709
MCF10A HAEMATOXYLIN	-0.0450347
MCF10A HALCINONIDE	-0.0205335
MCF10A HECOGENIN ACETATE	0.0491486
MCF10A HEXESTROL	-0.0488598
MCF10A HEXETIDINE	-0.0400054
MCF10A HIERACIN	-0.00305907
MCF10A HYCANTHONE	0.0784836
MCF10A HYDRASTININE HYDROCHLORIDE	-0.0994922
MCF10A HYDROXYAMPHETAMINE HYDROBROMIDE	0.0130291
MCF10A HYDROXYCHLOROQUINE SULFATE	-0.0234523
MCF10A HYDROXYTOLUIC ACID	-0.0532234
MCF10A IDAZOXAN HYDROCHLORIDE	0.00217661
MCF10A IMEXON	0.0151137
MCF10A IMIQUIMOD HYDROCHLORIDE	0.00518379
MCF10A INAMRINONE	0.107086
MCF10A INDINAVIR SULFATE	-0.0786484
MCF10A IOTHALAMIC ACID	-0.0412423
MCF10A IPRIFLAVONE	-0.0290336
MCF10A IPRONIAZID PHOSPHATE	-0.00721138
MCF10A ISOBUTAMBEN	0.0433633
MCF10A ISOBUTYLMETHYLXANTHINE	-0.0236433
MCF10A ISOCOTOIN	-0.00503263
MCF10A ISOFLAVONE	-0.00512955
MCF10A ISOGUVACINE HYDROCHLORIDE	-0.000386006
MCF10A ISOTRETINON	0.0191811
MCF10A ISOVALERAMIDE	0.0446256
MCF10A ISOXICAM	-0.0310066
MCF10A JUAREZIC ACID	-0.0619949
MCF10A KETANSERIN TARTRATE	-0.0388139
MCF10A KETOPROFEN	-0.0411141
MCF10A KHELLIN	-0.120542
MCF10A LABETALOL HYDROCHLORIDE	0.0296473
MCF10A LACITOL	-0.0643204
MCF10A LACTOBIONIC ACID	-0.0741301
MCF10A LANATOSIDE C	0.354992
MCF10A LARIXOL ACETATE	-0.00665229
MCF10A LASALOCID SODIUM	-0.024809
MCF10A LEOIDIN	-0.0599163
MCF10A LEVAMISOLE HYDROCHLORIDE	-0.00874754
MCF10A LINAGLIPTIN HYDROCHLORIDE	-0.0315472
MCF10A LINAMARIN	-0.0176393
MCF10A LINDANE	-0.117311
MCF10A LISINOPRIL	-0.0543581
MCF10A LITHOCHOLIC ACID	-0.0769181
MCF10A LOBELINE HYDROCHLORIDE	-0.04252
MCF10A LOPERAMIDE HYDROCHLORIDE	0.0362019
MCF10A LORGLUMIDE SODIUM	0.0124649
MCF10A MALATHION	-0.0197667
MCF10A MAPROTILINE HYDROCHLORIDE	-0.0232479
MCF10A MEBHYDROLIN	-0.00563646
MCF10A MECHLORETHAMINE	0.056273
MCF10A MECLIZINE HYDROCHLORIDE	-0.0961856
MCF10A MECYSTEINE HYDROCHLORIDE	-0.0176398
MCF10A MEDRYSONE	-0.0183089
MCF10A MEFLOQUINE	0.0466751
MCF10A MEGESTROL ACETATE	0.0796529
MCF10A MELATONIN	-0.0528406
MCF10A MENADIONE	0.0250401
MCF10A MENTHONE	-0.0853739
MCF10A MENTHYL BENZOATE	-0.00493217
MCF10A MEPRYLCAINE HYDROCHLORIDE	-0.0759407
MCF10A MESNA	-0.0375544
MCF10A meta-CRESYL ACETATE	-0.0293599
MCF10A METARAMINOL BITARTRATE	-0.00677995
MCF10A METHAPYRILENE HYDROCHLORIDE	0.0926226
MCF10A METHAZOLAMIDE	-0.037361
MCF10A METHOXYVONE	-0.0128822
MCF10A METHYL CHOLATE	-0.018734
MCF10A METHYL DEOXYCHOLATE	0.0259389
MCF10A METHYSERGIDE MALEATE	-0.0257375
MCF10A MEVASTATIN	0.000378953
MCF10A MITOTANE	-0.0213672
MCF10A MODAFINIL	-0.103706
MCF10A MOMETASONE FUROATE	0.0111986
MCF10A MONOBENZONE	-0.0716088
MCF10A MONOCROTALINE	0.0166338
MCF10A N-METHYLBENZYLAMINE HYDROCHLORIDE	0.0213806
MCF10A N-PHENYLANTHRANILIC ACID	-0.0270873
MCF10A NANOFIN	-0.0304611
MCF10A NARASIN	-0.0178548
MCF10A NEOSTIGMINE METHYLSULFATE	-0.0540559
MCF10A NIALAMIDE	-0.0238148
MCF10A NICOTINE BITARTRATE	-0.0640623
MCF10A NICOTINYL ALCOHOL TARTRATE	-0.0446061
MCF10A NIFUROXAZIDE	0.0194994
MCF10A NITROXOLINE	0.0106912
MCF10A NOCODAZOLE	0.35653
MCF10A NOMIFENSINE MALEATE	-0.0657336
MCF10A NONOXYNOL-9	-0.00802299
MCF10A NOREPINEPHRINE TARTRATE	-0.0447989
MCF10A NORETHINDRONE	0.0337554
MCF10A NORETHINDRONE ACETATE	-0.120249
MCF10A NORETHYNODREL	-0.00242528
MCF10A NORFLOXACIN	-0.035296
MCF10A NORGESTREL	-0.0988507
MCF10A NORTRIPTYLINE HYDROCHLORIDE	0.000236162
MCF10A NOSCAPINE HYDROCHLORIDE	-0.0134686
MCF10A NOVOBIOCIN SODIUM	-0.0248778
MCF10A NYLIDRIN HYDROCHLORIDE	0.0389227
MCF10A NYSTATIN	-0.0335673
MCF10A OCTOCRYLENE	-0.0628651
MCF10A OCTODRINE	-0.136043
MCF10A OCTOPAMINE HYDROCHLORIDE	-0.0226548
MCF10A OLANZAPINE	-0.0371723
MCF10A OLEANOLIC ACID ACETATE	0.0764039
MCF10A OLMESARTAN	0.00955505
MCF10A OLMESARTAN MEDOXOMIL	-0.0329504
MCF10A OMEGA-3-ACID ESTERS (EPA shown)	-0.0828106
MCF10A ONDANSETRON	-0.00761192
MCF10A ORPHENADRINE CITRATE	-0.056786
MCF10A OXACILLIN SODIUM	-0.0750325
MCF10A OXAPROZIN	-0.0286941
MCF10A OXELAIDIN CITRATE	-0.102783
MCF10A OXFENDAZOLE	0.093341
MCF10A OXICONAZOLE NITRATE	0.0581388
MCF10A OXIDOPAMINE HYDROCHLORIDE	-0.0321017
MCF10A OXOLINIC ACID	-0.0294134
MCF10A OXYBENZONE	-0.111805
MCF10A OXYCLOZANIDE	-0.0471878
MCF10A OXYMETAZOLINE HYDROCHLORIDE	-0.0372676
MCF10A OXYPHENBUTAZONE	-0.0329256
MCF10A OXYPHENONIUM BROMIDE	-0.0372289
MCF10A OXYQUINOLINE HEMISULFATE	0.0185188
MCF10A OXYTETRACYCLINE	-0.04344
MCF10A PACHYRRHIZIN	-0.0181354
MCF10A PANTETHINE	-0.0419251
MCF10A PANTOPRAZOLE	0.0214614
MCF10A PAPAVERINE HYDROCHLORIDE	0.00490816
MCF10A PARACHLOROPHENOL	-0.0489865
MCF10A PARGYLINE HYDROCHLORIDE	-0.0435799
MCF10A PAROXETINE HYDROCHLORIDE	-0.0810488
MCF10A PARTHENOLIDE	0.261444
MCF10A PENICILLAMINE	-0.0851242
MCF10A PENICILLAMINE METHYL ESTER HYDROCHLORIDE	-0.0124212
MCF10A PENICILLIN G POTASSIUM	-0.0460479
MCF10A PENICILLIN V POTASSIUM	-0.123407
MCF10A PENTAMIDINE ISETHIONATE	-0.0141013
MCF10A PENTYLENETETRAZOL	-0.141077
MCF10A PERHEXILINE MALEATE	-0.0256025
MCF10A PERINDOPRIL ERBUMINE	-0.00239663
MCF10A PERMETHRIN	-0.047433
MCF10A PERSEITOL HEPTAACETATE	0.0926715
MCF10A PHENACEMIDE	0.00594858
MCF10A PHENAZOPYRIDINE HYDROCHLORIDE	-0.0406302
MCF10A PHENELZINE SULFATE	-0.0444128
MCF10A PHENINDIONE	-0.0644619
MCF10A PHENIRAMINE MALEATE	0.00501103
MCF10A PHENOLPHTHALEIN	-0.0358181
MCF10A PHENOTHIAZINE	-0.0134803
MCF10A PHENSUCCIMIDE	-0.0309171
MCF10A PHENYLBUTAZONE	-0.0640697
MCF10A PHENYLEPHRINE HYDROCHLORIDE	0.0100409
MCF10A PHTHALYLSULFATHIAZOLE	-0.00602622
MCF10A PICOLAMINE	-0.0186287
MCF10A PIDOLIC ACID	-0.0303003
MCF10A PIMAGEDINE HYDROCHLORIDE	-0.0838414
MCF10A PINACIDIL	-0.0459613
MCF10A PIPEMIDIC ACID	-0.00848343
MCF10A PIPERIDOLATE HYDROCHLORIDE	-0.0202504
MCF10A PIRACETAM	-0.120036
MCF10A PRALIDOXIME MESYLATE	-0.087595
MCF10A PRASTERONE ACETATE	-0.0658261
MCF10A PRASUGREL	-0.0620886
MCF10A PREGNENOLONE	-0.063006
MCF10A PROADIFEN HYDROCHLORIDE	0.0155439
MCF10A PROPOXUR	-0.0494182
MCF10A PROPRANOLOL HYDROCHLORIDE (+/-)	0.063877
MCF10A PROTOPORPHYRIN IX	-0.0951562
MCF10A PROXYPHYLLINE	-0.0675324
MCF10A PTAEROXYLIN	-0.00142881
MCF10A PURPUROGALLIN	-0.0432911
MCF10A PYRIDOSTIGMINE BROMIDE	-0.0560329
MCF10A PYRITINOL	-0.0642255
MCF10A QUETIAPINE	-0.0366342
MCF10A QUINAPRIL HYDROCHLORIDE	-0.0503475
MCF10A QUININE ETHYL CARBONATE	-0.00701339
MCF10A RAMIPRIL	-0.0560859
MCF10A RANITIDINE HYDROCHLORIDE	-0.0903431
MCF10A RANOLAZINE	-0.0344503
MCF10A RAUWOLSCINE HYDROCHLORIDE	0.0439989
MCF10A RETINOL	-0.0716306
MCF10A RHAMNETIN	-0.0884686
MCF10A RIBOFLAVIN	-0.0925446
MCF10A RIBOFLAVIN 5-PHOSPHATE SODIUM	-0.0628986
MCF10A RIFAXIMIN	-0.0298105
MCF10A RIMANTADINE HYDROCHLORIDE	-0.128767
MCF10A RITANSERIN	0.0802459
MCF10A RIZATRIPTAN BENZOATE	-0.00536398
MCF10A RONIDAZOLE	-0.0584158
MCF10A ROSUVASTATIN CALCIUM	-0.113162
MCF10A RUTIN	-0.0977739
MCF10A S-ISOCORYDINE (+)	-0.0439581
MCF10A SACCHARIN	-0.0215522
MCF10A SALICIN	-0.0668407
MCF10A SALSOLIDINE	-0.00637225
MCF10A SARAFLOXACIN HYDROCHLORIDE	-0.0865332
MCF10A SEROTONIN HYDROCHLORIDE	-0.0600108
MCF10A SERTRALINE HYDROCHLORIDE	-0.0495016
MCF10A SIBUTRAMINE HYDROCHLORIDE	-0.0528679
MCF10A SILDENAFIL CITRATE	0.018652
MCF10A SITOSTERYL ACETATE	0.0219131
MCF10A SPIPERONE	-0.0198898
MCF10A STIGMASTEROL	-0.0284029
MCF10A SUBERIC ACID	-0.0145688
MCF10A SUCCINYLSULFATHIAZOLE	-0.0996664
MCF10A SUCRALOSE	-0.0310224
MCF10A SULFAGUANIDINE	-0.0757449
MCF10A SULFAMETER	-0.063397
MCF10A SULFAMETHOXYPYRIDAZINE	0.00157176
MCF10A SULFANILAMIDE	-0.0533556
MCF10A SULFAPHENAZOLE	-0.0506517
MCF10A SULOCTIDIL	-0.00703855
MCF10A SUMATRIPTAN	-0.0277367
MCF10A SURAMIN HEXASODIUM	-0.0690934
MCF10A SYMCLOSENE	-0.105578
MCF10A TANSHINONE IIA SULFONATE SODIUM	-0.0218074
MCF10A TEGASEROD MALEATE	-0.0309568
MCF10A TELITHROMYCIN	0.0129649
MCF10A TELMISARTAN	-0.00480298
MCF10A TEMAZEPAM	-0.0110147
MCF10A TEMEFOS	0.0456675
MCF10A TENOXICAM	-0.0743257
MCF10A THIAMPHENICOL	-0.0244469
MCF10A THONZYLAMINE HYDROCHLORIDE	-0.0136117
MCF10A TIAPRIDE HYDROCHLORIDE	0.0872048
MCF10A TIGECYCLINE	-0.0609656
MCF10A TIGOGENIN	0.0097052
MCF10A TINIDAZOLE	-0.0223273
MCF10A TOLAZAMIDE	0.00598657
MCF10A TOLONIUM CHLORIDE	0.0664976
MCF10A TOREMIFENE CITRATE	-0.0280669
MCF10A TORSEMIDE	-0.0163935
MCF10A TRANDOLAPRIL	-0.0593319
MCF10A TRAZODONE HYDROCHLORIDE	0.38909
MCF10A TRETINOIN	0.0488124
MCF10A TRIACETYLRESVERATROL	-0.0658652
MCF10A TRICLABENDAZOLE	-0.0382405
MCF10A TRIMETHADIONE	-0.0327768
MCF10A TRIMIPRAMINE MALEATE	0.0987462
MCF10A TROCLOSENE SODIUM	-0.0156109
MCF10A TROLEANDOMYCIN	0.00339038
MCF10A TROMETHAMINE	-0.0190344
MCF10A TROSPIUM CHLORIDE	-0.0602533
MCF10A TYLOSIN TARTRATE	-0.0055929
MCF10A TYROSINE HYDROCHLORIDE	-0.0290642
MCF10A UBIDECARENONE [5mM]	0.0645871
MCF10A UNDECYLENIC ACID	0.00885554
MCF10A VALACYCLOVIR HYDROCHLORIDE	0.0486254
MCF10A VALDECOXIB	-0.0232035
MCF10A VALSARTAN	-0.0550094
MCF10A VARDENAFIL HYDROCHLORIDE	-0.0477211
MCF10A VERAPAMIL HYDROCHLORIDE	0.000279013
MCF10A VINCAMINE	-0.0618873
MCF10A VINPOCETINE	-0.0189457
MCF10A VIOMYCIN SULFATE	-0.096017
MCF10A XYLAZINE	-0.0667185
MCF10A XYLOSE	-0.0392106
MCF10A ZIDOVUDINE [AZT]	-0.0808356
MCF10A ZOLMITRIPTAN	-0.0595864
MCF10A ZOLPIDEM	0.106609
Rad21 '1,7-DIDEACETOXY-1,7-DIOXO-3-DEACETYLKHIVORIN'	0.0762452
Rad21 '18-AMINOABIETA-8,11,13-TRIENE SULFATE'	-0.0570505
Rad21 '1S,2R-PHENYLPROPANOLAMINE HYDROCHLORIDE'	-0.127639
Rad21 '2,3-DIMERCAPTOSUCCINIC ACID'	-0.120364
Rad21 '4,6-DIMETHOXY-5-METHYLISOFLAVONE'	0.0657297
Rad21 '5,2-DIMETHOXYFLAVONE'	-0.0924257
Rad21 '6-(3,4-METHYLENEDIOXYSTYRYL)-alpha-PYRONE'	-0.14257
Rad21 'ABSCISIC ACID (cis,trans; +/-)'	0.0385044
Rad21 'BETAMETHASONE 17,21-DIPROPIONATE'	0.154166
Rad21 'DUARTIN, DIMETHYL ETHER'	0.0827206
Rad21 'ESTRADIOL-3-SULFATE, SODIUM SALT'	0.088981
Rad21 'HETEROPEUCENIN, METHYL ETHER'	0.0656794
Rad21 'KOPARIN 2,3-DIMETHYL ETHER'	-0.00228945
Rad21 1-(2-METHOXYPHENYL)PIERAZINE HYDROCHLORIDE	0.0317041
Rad21 1-MONOPALMITIN	-0.0622218
Rad21 2-MERCAPTOETHANOL	0.0688547
Rad21 3-AMINOPROPIONITRILE FUMARATE	-0.0564066
Rad21 3-HYDROXY-4-(SUCCIN-2-YL)-CARYOLANE delta-LACTONE	-0.044538
Rad21 3-HYDROXYBENZYLHYDRAZINE DIHYDROCHLORIDE	0.0777128
Rad21 3-METHOXYCATECHOL	0.0645239
Rad21 3-METHYLORSELLINIC ACID	0.0704648
Rad21 3-OXOURSAN(28-13)OLIDE	0.0328774
Rad21 4-(3-BUTOXY-4-METHOXYBENZYL)IMIDAZOLIDIN-2-ONE	-0.01459
Rad21 4-DEMETHYLEPICROPODOPHYLLOTOXIN	0.433426
Rad21 5-CHLOROINDOLE-2-CARBOXYLIC ACID	-0.113762
Rad21 7-DEACETOXY-7-OXOKHIVORIN	0.0178427
Rad21 7-DEACETYLKHIVORIN	-0.102198
Rad21 ACARBOSE	-0.030955
Rad21 ACEDAPSONE	0.0671872
Rad21 ACEGLUTAMIDE	0.00558771
Rad21 ACEMETACIN	-0.0415661
Rad21 ACEPROMAZINE MALEATE	0.0379036
Rad21 ACETARSOL	-0.115122
Rad21 ACONITIC ACID	-0.135763
Rad21 ACTINOQUINOL SODIUM	-0.0570418
Rad21 ADIPHENINE HYDROCHLORIDE	0.047442
Rad21 AJMALINE	-0.113134
Rad21 AKLOMIDE	0.0991518
Rad21 ALFUZOSIN HYDROCHLORIDE	-0.0852461
Rad21 ALMOTRIPTAN	-0.137433
Rad21 alpha-CYANO-3-HYDROXYCINNAMIC ACID	-0.0399069
Rad21 alpha-MANGOSTIN	-0.0478061
Rad21 ALPINETIN METHYL ETHER	0.0477904
Rad21 ALPRENOLOL HYDROCHLORIDE	0.00362152
Rad21 ALRESTATIN	-0.106632
Rad21 ALTRETAMINE	-0.0894804
Rad21 AMIFOSTINE	0.0546833
Rad21 AMIKACIN HYDRATE	0.018106
Rad21 AMINOETHYLISOTHIOUREA DIHYDROBROMIDE	-0.022027
Rad21 AMINOHIPPURIC ACID	-0.125732
Rad21 AMINOPYRINE	-0.0327786
Rad21 AMIODARONE HYDROCHLORIDE	-0.00524528
Rad21 AMITRAZ	0.00580449
Rad21 AMLODIPINE BESYLATE	0.0912924
Rad21 AMMONIUM LACTATE	-0.101772
Rad21 ANGOLENSIN (R)	0.0611513
Rad21 ANISINDIONE	-0.0704107
Rad21 ANTIAROL	-0.0534066
Rad21 APRAMYCIN SULFATE	0.125392
Rad21 ARACHIDONIC ACID	-0.0601889
Rad21 ARTESUNATE	-0.0430758
Rad21 ARTHONIOIC ACID	-6.89e-05
Rad21 ASCORBIC ACID	-0.0514987
Rad21 ASPARTAME	-0.0480727
Rad21 ASTEMIZOLE	0.0777403
Rad21 ATOMOXETINE HYDROCHLORIDE	-0.0898484
Rad21 AURIN TRICARBOXYLIC ACID	0.164985
Rad21 AVANAFIL	-0.152235
Rad21 AZACITIDINE	0.281689
Rad21 AZASERINE	-0.124323
Rad21 AZELASTINE HYDROCHLORIDE	-0.100884
Rad21 AZLOCILLIN SODIUM	0.167702
Rad21 BACAMPICILLIN HYDROCHLORIDE	0.0560351
Rad21 BECLAMIDE	-0.0851571
Rad21 BEMOTRIZINOL	-0.0973848
Rad21 BENDROFLUMETHIAZIDE	0.053021
Rad21 BENFLUOREX HYDROCHLORIDE	-0.151452
Rad21 BENFOTIAMINE	-0.0248244
Rad21 BENOXINATE HYDROCHLORIDE	-0.0333573
Rad21 BENZOIC ACID	-0.0545636
Rad21 BENZOYL PEROXIDE	-0.111353
Rad21 BENZYL BENZOATE	0.0361973
Rad21 BEPRIDIL HYDROCHLORIDE	0.00241005
Rad21 BERBERINE CHLORIDE	-0.0683926
Rad21 BERGAPTEN	0.110088
Rad21 BETAINE HYDROCHLORIDE	0.0746157
Rad21 BETAXALOL HYDROCHLORIDE	-0.122555
Rad21 BEZAFIBRATE	-0.158497
Rad21 BICUCULLINE (+)	0.0813356
Rad21 BIFONAZOLE	-0.00712148
Rad21 BILIRUBIN	0.111066
Rad21 BIOTIN	-0.0229086
Rad21 BRETYLIUM TOSYLATE	-0.0955016
Rad21 BRINZOLAMIDE	-0.0169723
Rad21 BROMHEXINE HYDROCHLORIDE	0.047458
Rad21 BROXYQUINOLINE	-0.0848386
Rad21 BRUCINE	-0.048197
Rad21 BUFLOMEDIL HYDROCHLORIDE	-0.115426
Rad21 BUMETANIDE	-0.128312
Rad21 BUTYLATED HYDROXYTOLUENE	0.176173
Rad21 CADAVERINE TARTRATE	0.043576
Rad21 CAMYLOFINE DIHYDROCHLORIDE	-0.058504
Rad21 CANRENONE	0.0679027
Rad21 CARAPIN	-0.0568138
Rad21 CARBADOX	-0.0411766
Rad21 CARBENOXOLONE SODIUM	-0.0939076
Rad21 CARBIDOPA	-0.137559
Rad21 CARNITINE (dl) HYDROCHLORIDE	-0.0706606
Rad21 CARPROFEN	-0.117784
Rad21 CASANTHRANOL [cascaroside A shown]	-0.00990896
Rad21 CATECHIN PENTAACETATE	0.0712235
Rad21 CEFALONIUM	-0.0452322
Rad21 CEFAMANDOLE NAFATE	-0.100513
Rad21 CEFAMANDOLE SODIUM	-0.0452564
Rad21 CEFDINIR	-0.0662
Rad21 CEFDITORIN PIVOXIL	-0.0871328
Rad21 CEFEPIME HYDROCHLORIDE	0.00970901
Rad21 CEFMENOXIME HYDROCHLORIDE	-0.0559329
Rad21 CEFMETAZOLE SODIUM	-0.11952
Rad21 CEFONICID SODIUM	0.0715367
Rad21 CEFOPERAZONE	-0.097129
Rad21 CEFORANIDE	-0.121721
Rad21 CEFOTETAN	-0.0757992
Rad21 CEFOXITIN SODIUM	-0.0995895
Rad21 CEFPROZIL	-0.0964538
Rad21 CEFTIBUTEN	0.144379
Rad21 CEFTRIAXONE SODIUM TRIHYDRATE	-0.0371673
Rad21 CEFUROXIME SODIUM	-0.0467058
Rad21 CELLOBIOSE (D[+])	-0.0685121
Rad21 CEPHALEXIN	-0.0359535
Rad21 CEPHALOSPORIN C Zn	-0.0389967
Rad21 CETIRIZINE HYDROCHLORIDE	-0.0876221
Rad21 CHLORMADINONE ACETATE	0.0362991
Rad21 CHLOROPYRAMINE HYDROCHLORIDE	-0.071709
Rad21 CHLOROXINE	-0.0424147
Rad21 CHLORPROTHIXENE HYDROCHLORIDE	-0.0118807
Rad21 CHLORPYRIFOS	-0.0222185
Rad21 CHLORQUINALDOL	0.193715
Rad21 CILOSTAZOL	0.0758461
Rad21 CINCHONIDINE	-0.105148
Rad21 CINCHONINE	-0.0942961
Rad21 CINNARAZINE	-0.0775028
Rad21 CINROMIDE	-0.106311
Rad21 CINTRIAMIDE	-0.116301
Rad21 CIPROFIBRATE	-0.0558011
Rad21 CLEMIZOLE HYDROCHLORIDE	-0.105803
Rad21 CLINAFOXACIN HYDROCHLORIDE	-0.0701459
Rad21 CLOFIBRIC ACID	-0.171393
Rad21 CLONAZEPAM	0.0350354
Rad21 CLOPIDOL	0.00716375
Rad21 COUMOPHOS	-0.0438057
Rad21 CREATININE	0.00566753
Rad21 CROTAMITON	0.0925128
Rad21 CUELURE	0.0492611
Rad21 CYCLOBENZAPRINE HYDROCHLORIDE	-0.0302771
Rad21 CYCLOHEXIMIDE	0.37453
Rad21 CYCLOSPORINE	-0.0492336
Rad21 CYROMAZINE	-0.0931844
Rad21 CYTIDINE TRIPHOSPHATE DISODIUM	0.0531694
Rad21 D-PHENYLALANINE	-0.107704
Rad21 DACTINOMYCIN	0.887188
Rad21 DANTROLENE SODIUM	-5.32e-05
Rad21 DAPAGLIFLOZIN	-0.109136
Rad21 DEACETOXY-7-OXOGEDUNIN	0.03434
Rad21 DEBRISOQUIN SULFATE	0.02389
Rad21 DEGUELIN(-)	-0.0476462
Rad21 DEHYDROABIETAMIDE	0.0280641
Rad21 DEHYDROACETIC ACID	-0.0390157
Rad21 DEHYDRODIHYDROROTENONE	-0.0724681
Rad21 DEHYDROROTENONE	0.0277886
Rad21 DERACOXIB	-0.127425
Rad21 DEXTROAMPHETAMINE SULFATE	-0.0471746
Rad21 DIBEKACIN	-0.127533
Rad21 DICHLORISONE ACETATE	-0.0501602
Rad21 DICHLOROPHEN	-0.0190344
Rad21 DICLORALUREA	-0.0894941
Rad21 DIETHYLTOLUAMIDE	0.0259507
Rad21 DIFFRACTAIC ACID	-0.0732023
Rad21 DIFLORASONE DIACETATE	0.101969
Rad21 DIFLUBENZURON	-0.0716274
Rad21 DIHYDROCELASTRYL DIACETATE	-0.0551413
Rad21 DIHYDROFISSINOLIDE	-0.051989
Rad21 DIHYDROGEDUNIN	-0.0341808
Rad21 DOXORUBICIN	-0.0682293
Rad21 DROFENINE HYDROCHLORIDE	-0.141946
Rad21 DRONEDARONE HYDROCHLORIDE	0.0426449
Rad21 DROPROPIZINE	-0.0822462
Rad21 DULOXETINE HYDROCHLORIDE	-0.016473
Rad21 ECONAZOLE NITRATE	-0.0461774
Rad21 EDITOL	-0.0353634
Rad21 EDOXUDINE	0.0676637
Rad21 ELETRIPTAN HYDROBROMIDE	-0.0171258
Rad21 ENALAPRIL MALEATE	-0.0979841
Rad21 ENOXACIN	-0.0573245
Rad21 ENTANDROPHRAGMIN	-0.0956082
Rad21 EPIGALLOCATECHIN-3-MONOGALLATE	0.0296236
Rad21 ERYTHROMYCIN ESTOLATE	-0.0359576
Rad21 ERYTHROMYCIN STEARATE	-0.0732717
Rad21 ESCITALOPRAM OXALATE	0.121389
Rad21 ESTRADIOL ACETATE	0.033169
Rad21 ESTRADIOL BENZOATE	-0.106258
Rad21 ESTRAMUSTINE	-0.00333851
Rad21 ETHANOLAMINE OLEATE	0.108691
Rad21 ETHAVERINE HYDROCHLORIDE	-0.113344
Rad21 ETHISTERONE	-0.0130848
Rad21 ETHOSUXIMIDE	-0.0876472
Rad21 ETHYL PARABEN	0.025943
Rad21 ETHYL VANILLIN	0.150788
Rad21 ETIDRONATE DISODIUM	-0.0281143
Rad21 EZETIMIBE	0.0558951
Rad21 FAMCICLOVIR	-0.0492195
Rad21 FAMPROFAZONE	-0.0975267
Rad21 FENBUTYRAMIDE	-0.0526017
Rad21 FENDILINE HYDROCHLORIDE	-0.0594331
Rad21 FENTHION	-0.0809967
Rad21 FIROCOXIB	0.0659752
Rad21 FLOPROPIONE	-0.0334268
Rad21 FLOXURIDINE	0.243901
Rad21 FLUMETHASONE	-0.00599209
Rad21 FLUNISOLIDE	0.00908476
Rad21 FLURANDRENOLIDE	-0.108687
Rad21 FLUROXENE	0.0157413
Rad21 FLUVASTATIN SODIUM	0.0656065
Rad21 FOMEPIZOLE	-0.0537154
Rad21 FOSCARNET SODIUM	-0.0490958
Rad21 FOSFOMYCIN CALCIUM	-0.0639756
Rad21 FUCOSTANOL	-0.000429231
Rad21 GALANTAMINE	-0.0370097
Rad21 gamma-AMINOBUTYRIC ACID HYDROCHLORIDE	-0.0968888
Rad21 GARLICIN	-0.105888
Rad21 GITOXIGENIN	-0.0672784
Rad21 GITOXIGENIN DIACETATE	0.392575
Rad21 GLAFENINE	-0.121691
Rad21 GLUCONOLACTONE	-0.107713
Rad21 GLYCYLGLYCINE	-0.0149385
Rad21 HAEMATOXYLIN	-0.0436704
Rad21 HALCINONIDE	0.0667579
Rad21 HECOGENIN ACETATE	-0.00713506
Rad21 HEXESTROL	-0.125751
Rad21 HEXETIDINE	-0.0728529
Rad21 HIERACIN	-0.0529309
Rad21 HYCANTHONE	0.0979025
Rad21 HYDRASTININE HYDROCHLORIDE	-0.130751
Rad21 HYDROXYAMPHETAMINE HYDROBROMIDE	-0.00741542
Rad21 HYDROXYCHLOROQUINE SULFATE	0.0123408
Rad21 HYDROXYTOLUIC ACID	-0.0569923
Rad21 IDAZOXAN HYDROCHLORIDE	-0.0226224
Rad21 IMEXON	0.00500322
Rad21 IMIQUIMOD HYDROCHLORIDE	-0.108263
Rad21 INAMRINONE	0.010263
Rad21 INDINAVIR SULFATE	-0.133941
Rad21 IOTHALAMIC ACID	-0.0462843
Rad21 IPRIFLAVONE	-0.0135895
Rad21 IPRONIAZID PHOSPHATE	-0.00652077
Rad21 ISOBUTAMBEN	0.132726
Rad21 ISOBUTYLMETHYLXANTHINE	-0.127827
Rad21 ISOCOTOIN	0.0972694
Rad21 ISOFLAVONE	-0.0294739
Rad21 ISOGUVACINE HYDROCHLORIDE	0.0740576
Rad21 ISOTRETINON	-0.0239788
Rad21 ISOVALERAMIDE	0.172343
Rad21 ISOXICAM	-0.0359012
Rad21 JUAREZIC ACID	-0.100206
Rad21 KETANSERIN TARTRATE	0.0627299
Rad21 KETOPROFEN	-0.0589168
Rad21 KHELLIN	-0.0119519
Rad21 LABETALOL HYDROCHLORIDE	0.00453164
Rad21 LACITOL	0.0232161
Rad21 LACTOBIONIC ACID	-0.140692
Rad21 LANATOSIDE C	0.421769
Rad21 LARIXOL ACETATE	-0.095773
Rad21 LASALOCID SODIUM	-0.0744998
Rad21 LEOIDIN	-0.0179619
Rad21 LEVAMISOLE HYDROCHLORIDE	-0.0939858
Rad21 LINAGLIPTIN HYDROCHLORIDE	-0.0800245
Rad21 LINAMARIN	-0.0305853
Rad21 LINDANE	-0.0404605
Rad21 LISINOPRIL	-0.0226611
Rad21 LITHOCHOLIC ACID	-0.20647
Rad21 LOBELINE HYDROCHLORIDE	-0.145642
Rad21 LOPERAMIDE HYDROCHLORIDE	0.0977664
Rad21 LORGLUMIDE SODIUM	0.0862352
Rad21 MALATHION	-0.101928
Rad21 MAPROTILINE HYDROCHLORIDE	-0.00318112
Rad21 MEBHYDROLIN	-0.029637
Rad21 MECHLORETHAMINE	-0.0051804
Rad21 MECLIZINE HYDROCHLORIDE	0.00992488
Rad21 MECYSTEINE HYDROCHLORIDE	-0.0364234
Rad21 MEDRYSONE	0.109579
Rad21 MEFLOQUINE	0.0565028
Rad21 MEGESTROL ACETATE	0.186434
Rad21 MELATONIN	-0.079129
Rad21 MENADIONE	-0.0891971
Rad21 MENTHONE	-0.0157927
Rad21 MENTHYL BENZOATE	-0.0358607
Rad21 MEPRYLCAINE HYDROCHLORIDE	-0.0503571
Rad21 MESNA	-0.0549619
Rad21 meta-CRESYL ACETATE	-0.11341
Rad21 METARAMINOL BITARTRATE	0.0297936
Rad21 METHAPYRILENE HYDROCHLORIDE	0.024117
Rad21 METHAZOLAMIDE	-0.158005
Rad21 METHOXYVONE	0.000189263
Rad21 METHYL CHOLATE	0.0278395
Rad21 METHYL DEOXYCHOLATE	0.00792384
Rad21 METHYSERGIDE MALEATE	-0.069811
Rad21 MEVASTATIN	-0.0280439
Rad21 MITOTANE	-0.124446
Rad21 MODAFINIL	-0.133096
Rad21 MOMETASONE FUROATE	-0.0225454
Rad21 MONOBENZONE	-0.106998
Rad21 MONOCROTALINE	0.065633
Rad21 N-METHYLBENZYLAMINE HYDROCHLORIDE	0.0435576
Rad21 N-PHENYLANTHRANILIC ACID	-0.0421587
Rad21 NANOFIN	-0.00489848
Rad21 NARASIN	0.0554716
Rad21 NEOSTIGMINE METHYLSULFATE	-0.0780398
Rad21 NIALAMIDE	-0.135636
Rad21 NICOTINE BITARTRATE	0.0464621
Rad21 NICOTINYL ALCOHOL TARTRATE	-0.140109
Rad21 NIFUROXAZIDE	-0.107908
Rad21 NITROXOLINE	-0.0456768
Rad21 NOCODAZOLE	0.413246
Rad21 NOMIFENSINE MALEATE	-0.0532874
Rad21 NONOXYNOL-9	-0.0912009
Rad21 NOREPINEPHRINE TARTRATE	-0.102331
Rad21 NORETHINDRONE	-0.0628197
Rad21 NORETHINDRONE ACETATE	-0.0509167
Rad21 NORETHYNODREL	-0.0835054
Rad21 NORFLOXACIN	-0.0221376
Rad21 NORGESTREL	-0.14639
Rad21 NORTRIPTYLINE HYDROCHLORIDE	-0.0329963
Rad21 NOSCAPINE HYDROCHLORIDE	-0.0829657
Rad21 NOVOBIOCIN SODIUM	-0.157279
Rad21 NYLIDRIN HYDROCHLORIDE	0.0228652
Rad21 NYSTATIN	-0.0764283
Rad21 OCTOCRYLENE	-0.029975
Rad21 OCTODRINE	0.034795
Rad21 OCTOPAMINE HYDROCHLORIDE	-0.0917067
Rad21 OLANZAPINE	-0.0787576
Rad21 OLEANOLIC ACID ACETATE	0.0824441
Rad21 OLMESARTAN	0.0793477
Rad21 OLMESARTAN MEDOXOMIL	0.00402273
Rad21 OMEGA-3-ACID ESTERS (EPA shown)	-0.0801007
Rad21 ONDANSETRON	-0.031795
Rad21 ORPHENADRINE CITRATE	-0.0824297
Rad21 OXACILLIN SODIUM	-0.0975341
Rad21 OXAPROZIN	-0.0889585
Rad21 OXELAIDIN CITRATE	-0.0921428
Rad21 OXFENDAZOLE	0.0982223
Rad21 OXICONAZOLE NITRATE	0.0917157
Rad21 OXIDOPAMINE HYDROCHLORIDE	-0.067391
Rad21 OXOLINIC ACID	-0.0663208
Rad21 OXYBENZONE	-0.0886772
Rad21 OXYCLOZANIDE	-0.0998092
Rad21 OXYMETAZOLINE HYDROCHLORIDE	-0.0816096
Rad21 OXYPHENBUTAZONE	-0.0102337
Rad21 OXYPHENONIUM BROMIDE	-0.0484215
Rad21 OXYQUINOLINE HEMISULFATE	-0.000906256
Rad21 OXYTETRACYCLINE	-0.0431691
Rad21 PACHYRRHIZIN	0.0338504
Rad21 PANTETHINE	-0.119353
Rad21 PANTOPRAZOLE	-0.0183372
Rad21 PAPAVERINE HYDROCHLORIDE	-0.0825461
Rad21 PARACHLOROPHENOL	-0.0530757
Rad21 PARGYLINE HYDROCHLORIDE	-0.0995421
Rad21 PAROXETINE HYDROCHLORIDE	0.125899
Rad21 PARTHENOLIDE	0.335497
Rad21 PENICILLAMINE	0.105193
Rad21 PENICILLAMINE METHYL ESTER HYDROCHLORIDE	-0.114753
Rad21 PENICILLIN G POTASSIUM	-0.121147
Rad21 PENICILLIN V POTASSIUM	-0.060153
Rad21 PENTAMIDINE ISETHIONATE	-0.048777
Rad21 PENTYLENETETRAZOL	0.00724033
Rad21 PERHEXILINE MALEATE	-0.0956719
Rad21 PERINDOPRIL ERBUMINE	-0.0525821
Rad21 PERMETHRIN	-0.096385
Rad21 PERSEITOL HEPTAACETATE	0.0772934
Rad21 PHENACEMIDE	-0.028468
Rad21 PHENAZOPYRIDINE HYDROCHLORIDE	-0.070587
Rad21 PHENELZINE SULFATE	-0.141985
Rad21 PHENINDIONE	-0.127055
Rad21 PHENIRAMINE MALEATE	-0.149412
Rad21 PHENOLPHTHALEIN	-0.0538414
Rad21 PHENOTHIAZINE	0.00840504
Rad21 PHENSUCCIMIDE	-0.0531024
Rad21 PHENYLBUTAZONE	-0.0630546
Rad21 PHENYLEPHRINE HYDROCHLORIDE	-0.0387419
Rad21 PHTHALYLSULFATHIAZOLE	-0.0607434
Rad21 PICOLAMINE	-0.0809264
Rad21 PIDOLIC ACID	-0.114025
Rad21 PIMAGEDINE HYDROCHLORIDE	-0.0234671
Rad21 PINACIDIL	-0.0543771
Rad21 PIPEMIDIC ACID	-0.114265
Rad21 PIPERIDOLATE HYDROCHLORIDE	-0.136988
Rad21 PIRACETAM	-0.11497
Rad21 PRALIDOXIME MESYLATE	-0.00904259
Rad21 PRASTERONE ACETATE	-0.023839
Rad21 PRASUGREL	-0.025169
Rad21 PREGNENOLONE	-0.0970162
Rad21 PROADIFEN HYDROCHLORIDE	-0.0962035
Rad21 PROPOXUR	-0.0478889
Rad21 PROPRANOLOL HYDROCHLORIDE (+/-)	0.0992769
Rad21 PROTOPORPHYRIN IX	-0.0524853
Rad21 PROXYPHYLLINE	-0.0926016
Rad21 PTAEROXYLIN	-0.0334903
Rad21 PURPUROGALLIN	0.0532134
Rad21 PYRIDOSTIGMINE BROMIDE	-0.0711147
Rad21 PYRITINOL	-0.0504092
Rad21 QUETIAPINE	-0.0796353
Rad21 QUINAPRIL HYDROCHLORIDE	0.0901812
Rad21 QUININE ETHYL CARBONATE	-0.0197155
Rad21 RAMIPRIL	-0.067401
Rad21 RANITIDINE HYDROCHLORIDE	-0.0843674
Rad21 RANOLAZINE	-0.0370485
Rad21 RAUWOLSCINE HYDROCHLORIDE	-0.0870902
Rad21 RETINOL	-0.112482
Rad21 RHAMNETIN	-0.0899964
Rad21 RIBOFLAVIN	-0.0652269
Rad21 RIBOFLAVIN 5-PHOSPHATE SODIUM	-0.0586086
Rad21 RIFAXIMIN	-0.132259
Rad21 RIMANTADINE HYDROCHLORIDE	0.00114261
Rad21 RITANSERIN	0.0112309
Rad21 RIZATRIPTAN BENZOATE	0.0286176
Rad21 RONIDAZOLE	-0.0780064
Rad21 ROSUVASTATIN CALCIUM	-0.0359448
Rad21 RUTIN	-0.096032
Rad21 S-ISOCORYDINE (+)	-0.069184
Rad21 SACCHARIN	-0.0596021
Rad21 SALICIN	-0.0468437
Rad21 SALSOLIDINE	-0.0359587
Rad21 SARAFLOXACIN HYDROCHLORIDE	0.111044
Rad21 SEROTONIN HYDROCHLORIDE	0.0738715
Rad21 SERTRALINE HYDROCHLORIDE	-0.0528047
Rad21 SIBUTRAMINE HYDROCHLORIDE	-0.0863934
Rad21 SILDENAFIL CITRATE	0.0659369
Rad21 SITOSTERYL ACETATE	0.0398105
Rad21 SPIPERONE	-0.114145
Rad21 STIGMASTEROL	-0.0916889
Rad21 SUBERIC ACID	0.0206238
Rad21 SUCCINYLSULFATHIAZOLE	-0.118407
Rad21 SUCRALOSE	-0.00553718
Rad21 SULFAGUANIDINE	-0.110577
Rad21 SULFAMETER	-0.0833994
Rad21 SULFAMETHOXYPYRIDAZINE	-0.0943062
Rad21 SULFANILAMIDE	-0.0764951
Rad21 SULFAPHENAZOLE	-0.0413134
Rad21 SULOCTIDIL	-0.144147
Rad21 SUMATRIPTAN	-0.0848368
Rad21 SURAMIN HEXASODIUM	-0.0384694
Rad21 SYMCLOSENE	-0.0419651
Rad21 TANSHINONE IIA SULFONATE SODIUM	0.000714965
Rad21 TEGASEROD MALEATE	-0.103022
Rad21 TELITHROMYCIN	-0.0232014
Rad21 TELMISARTAN	0.0786643
Rad21 TEMAZEPAM	0.0467416
Rad21 TEMEFOS	0.228667
Rad21 TENOXICAM	-0.130142
Rad21 THIAMPHENICOL	-0.0793184
Rad21 THONZYLAMINE HYDROCHLORIDE	-0.154505
Rad21 TIAPRIDE HYDROCHLORIDE	0.0811669
Rad21 TIGECYCLINE	0.0207224
Rad21 TIGOGENIN	0.045277
Rad21 TINIDAZOLE	-0.0940743
Rad21 TOLAZAMIDE	-0.123617
Rad21 TOLONIUM CHLORIDE	0.139302
Rad21 TOREMIFENE CITRATE	-0.101015
Rad21 TORSEMIDE	0.0459397
Rad21 TRANDOLAPRIL	-0.115568
Rad21 TRAZODONE HYDROCHLORIDE	0.140375
Rad21 TRETINOIN	-0.0479487
Rad21 TRIACETYLRESVERATROL	-0.0535354
Rad21 TRICLABENDAZOLE	-0.0801064
Rad21 TRIMETHADIONE	-0.111985
Rad21 TRIMIPRAMINE MALEATE	0.11617
Rad21 TROCLOSENE SODIUM	-0.0285925
Rad21 TROLEANDOMYCIN	-0.0104835
Rad21 TROMETHAMINE	0.0055909
Rad21 TROSPIUM CHLORIDE	0.0193953
Rad21 TYLOSIN TARTRATE	0.114973
Rad21 TYROSINE HYDROCHLORIDE	0.0502716
Rad21 UBIDECARENONE [5mM]	-0.00817845
Rad21 UNDECYLENIC ACID	0.0414023
Rad21 VALACYCLOVIR HYDROCHLORIDE	0.0486128
Rad21 VALDECOXIB	-0.0549237
Rad21 VALSARTAN	0.0365733
Rad21 VARDENAFIL HYDROCHLORIDE	-0.0584322
Rad21 VERAPAMIL HYDROCHLORIDE	0.0437982
Rad21 VINCAMINE	-0.0999512
Rad21 VINPOCETINE	-0.0624049
Rad21 VIOMYCIN SULFATE	-0.0272764
Rad21 XYLAZINE	-0.114042
Rad21 XYLOSE	-0.063898
Rad21 ZIDOVUDINE [AZT]	-0.0490633
Rad21 ZOLMITRIPTAN	0.0367552
Rad21 ZOLPIDEM	0.147245
Smc3 '1,7-DIDEACETOXY-1,7-DIOXO-3-DEACETYLKHIVORIN'	-0.0888875
Smc3 '18-AMINOABIETA-8,11,13-TRIENE SULFATE'	-0.0358895
Smc3 '1S,2R-PHENYLPROPANOLAMINE HYDROCHLORIDE'	-0.151282
Smc3 '2,3-DIMERCAPTOSUCCINIC ACID'	-0.00204114
Smc3 '4,6-DIMETHOXY-5-METHYLISOFLAVONE'	0.100295
Smc3 '5,2-DIMETHOXYFLAVONE'	-0.0802564
Smc3 '6-(3,4-METHYLENEDIOXYSTYRYL)-alpha-PYRONE'	-0.03754
Smc3 'ABSCISIC ACID (cis,trans; +/-)'	0.105931
Smc3 'BETAMETHASONE 17,21-DIPROPIONATE'	0.273683
Smc3 'DUARTIN, DIMETHYL ETHER'	0.0531127
Smc3 'ESTRADIOL-3-SULFATE, SODIUM SALT'	0.21397
Smc3 'HETEROPEUCENIN, METHYL ETHER'	-0.0564881
Smc3 'KOPARIN 2,3-DIMETHYL ETHER'	0.0258322
Smc3 1-(2-METHOXYPHENYL)PIERAZINE HYDROCHLORIDE	-0.0540786
Smc3 1-MONOPALMITIN	-0.0776611
Smc3 2-MERCAPTOETHANOL	0.135366
Smc3 3-AMINOPROPIONITRILE FUMARATE	-0.068516
Smc3 3-HYDROXY-4-(SUCCIN-2-YL)-CARYOLANE delta-LACTONE	-0.0799133
Smc3 3-HYDROXYBENZYLHYDRAZINE DIHYDROCHLORIDE	0.100796
Smc3 3-METHOXYCATECHOL	-0.111048
Smc3 3-METHYLORSELLINIC ACID	-0.0511049
Smc3 3-OXOURSAN(28-13)OLIDE	0.172961
Smc3 4-(3-BUTOXY-4-METHOXYBENZYL)IMIDAZOLIDIN-2-ONE	-0.0270167
Smc3 4-DEMETHYLEPICROPODOPHYLLOTOXIN	0.436152
Smc3 5-CHLOROINDOLE-2-CARBOXYLIC ACID	-0.0167918
Smc3 7-DEACETOXY-7-OXOKHIVORIN	-0.0646118
Smc3 7-DEACETYLKHIVORIN	-0.118861
Smc3 ACARBOSE	-0.0974224
Smc3 ACEDAPSONE	0.161494
Smc3 ACEGLUTAMIDE	-0.157171
Smc3 ACEMETACIN	-0.0718635
Smc3 ACEPROMAZINE MALEATE	-0.0646086
Smc3 ACETARSOL	-0.00762791
Smc3 ACONITIC ACID	-0.0941127
Smc3 ACTINOQUINOL SODIUM	-0.00681811
Smc3 ADIPHENINE HYDROCHLORIDE	0.160164
Smc3 AJMALINE	-0.0938616
Smc3 AKLOMIDE	0.016474
Smc3 ALFUZOSIN HYDROCHLORIDE	-0.158482
Smc3 ALMOTRIPTAN	-0.164659
Smc3 alpha-CYANO-3-HYDROXYCINNAMIC ACID	-0.101783
Smc3 alpha-MANGOSTIN	-0.0715007
Smc3 ALPINETIN METHYL ETHER	0.104405
Smc3 ALPRENOLOL HYDROCHLORIDE	-0.0783204
Smc3 ALRESTATIN	-0.0442474
Smc3 ALTRETAMINE	-0.144379
Smc3 AMIFOSTINE	0.123095
Smc3 AMIKACIN HYDRATE	-0.0613029
Smc3 AMINOETHYLISOTHIOUREA DIHYDROBROMIDE	0.0272098
Smc3 AMINOHIPPURIC ACID	-0.062021
Smc3 AMINOPYRINE	-0.173352
Smc3 AMIODARONE HYDROCHLORIDE	0.0673626
Smc3 AMITRAZ	0.028878
Smc3 AMLODIPINE BESYLATE	0.0450726
Smc3 AMMONIUM LACTATE	-0.0670393
Smc3 ANGOLENSIN (R)	-0.0962236
Smc3 ANISINDIONE	-0.175095
Smc3 ANTIAROL	-0.0614554
Smc3 APRAMYCIN SULFATE	0.205211
Smc3 ARACHIDONIC ACID	-0.0369986
Smc3 ARTESUNATE	-0.00252961
Smc3 ARTHONIOIC ACID	-0.00645249
Smc3 ASCORBIC ACID	-0.0527332
Smc3 ASPARTAME	-0.159828
Smc3 ASTEMIZOLE	-0.0545086
Smc3 ATOMOXETINE HYDROCHLORIDE	-0.0841711
Smc3 AURIN TRICARBOXYLIC ACID	0.169986
Smc3 AVANAFIL	-0.0339946
Smc3 AZACITIDINE	0.230226
Smc3 AZASERINE	-0.0462757
Smc3 AZELASTINE HYDROCHLORIDE	-0.00580591
Smc3 AZLOCILLIN SODIUM	0.128634
Smc3 BACAMPICILLIN HYDROCHLORIDE	0.102417
Smc3 BECLAMIDE	0.00603416
Smc3 BEMOTRIZINOL	-0.116456
Smc3 BENDROFLUMETHIAZIDE	0.161275
Smc3 BENFLUOREX HYDROCHLORIDE	-0.186836
Smc3 BENFOTIAMINE	-0.0679003
Smc3 BENOXINATE HYDROCHLORIDE	-0.0247172
Smc3 BENZOIC ACID	-0.144816
Smc3 BENZOYL PEROXIDE	-0.123972
Smc3 BENZYL BENZOATE	0.135474
Smc3 BEPRIDIL HYDROCHLORIDE	0.0903879
Smc3 BERBERINE CHLORIDE	-0.107113
Smc3 BERGAPTEN	0.129826
Smc3 BETAINE HYDROCHLORIDE	0.105711
Smc3 BETAXALOL HYDROCHLORIDE	-0.0820198
Smc3 BEZAFIBRATE	-0.114451
Smc3 BICUCULLINE (+)	0.0287075
Smc3 BIFONAZOLE	-0.149308
Smc3 BILIRUBIN	0.100724
Smc3 BIOTIN	0.0854803
Smc3 BRETYLIUM TOSYLATE	-0.0472652
Smc3 BRINZOLAMIDE	0.0202693
Smc3 BROMHEXINE HYDROCHLORIDE	0.0916671
Smc3 BROXYQUINOLINE	-0.0269876
Smc3 BRUCINE	-0.06504
Smc3 BUFLOMEDIL HYDROCHLORIDE	-0.0714156
Smc3 BUMETANIDE	-0.228066
Smc3 BUTYLATED HYDROXYTOLUENE	0.200842
Smc3 CADAVERINE TARTRATE	-0.0277199
Smc3 CAMYLOFINE DIHYDROCHLORIDE	-0.0456481
Smc3 CANRENONE	0.0643719
Smc3 CARAPIN	-0.0265677
Smc3 CARBADOX	0.0057634
Smc3 CARBENOXOLONE SODIUM	0.0194463
Smc3 CARBIDOPA	-0.0201505
Smc3 CARNITINE (dl) HYDROCHLORIDE	-0.035928
Smc3 CARPROFEN	-0.0742324
Smc3 CASANTHRANOL [cascaroside A shown]	0.0245035
Smc3 CATECHIN PENTAACETATE	0.114458
Smc3 CEFALONIUM	-0.0653118
Smc3 CEFAMANDOLE NAFATE	-0.0735776
Smc3 CEFAMANDOLE SODIUM	-0.0469662
Smc3 CEFDINIR	-0.154643
Smc3 CEFDITORIN PIVOXIL	-0.088338
Smc3 CEFEPIME HYDROCHLORIDE	0.0834017
Smc3 CEFMENOXIME HYDROCHLORIDE	-0.0836013
Smc3 CEFMETAZOLE SODIUM	-0.0996844
Smc3 CEFONICID SODIUM	-0.103691
Smc3 CEFOPERAZONE	0.0543874
Smc3 CEFORANIDE	0.00194089
Smc3 CEFOTETAN	-0.0561029
Smc3 CEFOXITIN SODIUM	-0.0588949
Smc3 CEFPROZIL	-0.0916914
Smc3 CEFTIBUTEN	0.2413
Smc3 CEFTRIAXONE SODIUM TRIHYDRATE	-0.044353
Smc3 CEFUROXIME SODIUM	0.0984477
Smc3 CELLOBIOSE (D[+])	-0.0430658
Smc3 CEPHALEXIN	0.0277284
Smc3 CEPHALOSPORIN C Zn	0.00457455
Smc3 CETIRIZINE HYDROCHLORIDE	-0.0687085
Smc3 CHLORMADINONE ACETATE	0.199378
Smc3 CHLOROPYRAMINE HYDROCHLORIDE	-0.048516
Smc3 CHLOROXINE	-0.0717539
Smc3 CHLORPROTHIXENE HYDROCHLORIDE	0.098073
Smc3 CHLORPYRIFOS	-0.00909319
Smc3 CHLORQUINALDOL	0.16565
Smc3 CILOSTAZOL	0.112137
Smc3 CINCHONIDINE	-0.074376
Smc3 CINCHONINE	-0.137621
Smc3 CINNARAZINE	-0.134129
Smc3 CINROMIDE	-0.0551542
Smc3 CINTRIAMIDE	-0.0442344
Smc3 CIPROFIBRATE	-0.0186758
Smc3 CLEMIZOLE HYDROCHLORIDE	-0.077234
Smc3 CLINAFOXACIN HYDROCHLORIDE	-0.0473544
Smc3 CLOFIBRIC ACID	-0.111256
Smc3 CLONAZEPAM	-0.0716374
Smc3 CLOPIDOL	0.0816089
Smc3 COUMOPHOS	-0.0562951
Smc3 CREATININE	0.0773761
Smc3 CROTAMITON	0.0697051
Smc3 CUELURE	-0.0887342
Smc3 CYCLOBENZAPRINE HYDROCHLORIDE	-0.0391569
Smc3 CYCLOHEXIMIDE	0.402709
Smc3 CYCLOSPORINE	-0.144699
Smc3 CYROMAZINE	0.0131319
Smc3 CYTIDINE TRIPHOSPHATE DISODIUM	0.188432
Smc3 D-PHENYLALANINE	-0.060102
Smc3 DACTINOMYCIN	0.935179
Smc3 DANTROLENE SODIUM	0.0861715
Smc3 DAPAGLIFLOZIN	-0.00725562
Smc3 DEACETOXY-7-OXOGEDUNIN	-0.0728831
Smc3 DEBRISOQUIN SULFATE	-0.041634
Smc3 DEGUELIN(-)	-0.0396767
Smc3 DEHYDROABIETAMIDE	0.0274967
Smc3 DEHYDROACETIC ACID	0.00350921
Smc3 DEHYDRODIHYDROROTENONE	-0.0583236
Smc3 DEHYDROROTENONE	-0.122628
Smc3 DERACOXIB	-0.130687
Smc3 DEXTROAMPHETAMINE SULFATE	-0.0204318
Smc3 DIBEKACIN	0.0507237
Smc3 DICHLORISONE ACETATE	-0.100363
Smc3 DICHLOROPHEN	0.0408332
Smc3 DICLORALUREA	-0.101249
Smc3 DIETHYLTOLUAMIDE	0.0264655
Smc3 DIFFRACTAIC ACID	-0.0578398
Smc3 DIFLORASONE DIACETATE	0.0975126
Smc3 DIFLUBENZURON	-0.145251
Smc3 DIHYDROCELASTRYL DIACETATE	-0.142148
Smc3 DIHYDROFISSINOLIDE	-0.0655689
Smc3 DIHYDROGEDUNIN	-0.0434663
Smc3 DOXORUBICIN	-0.0220534
Smc3 DROFENINE HYDROCHLORIDE	-0.0409949
Smc3 DRONEDARONE HYDROCHLORIDE	0.0249705
Smc3 DROPROPIZINE	-0.15205
Smc3 DULOXETINE HYDROCHLORIDE	0.0341218
Smc3 ECONAZOLE NITRATE	0.0293129
Smc3 EDITOL	0.000420837
Smc3 EDOXUDINE	0.188301
Smc3 ELETRIPTAN HYDROBROMIDE	-0.0398368
Smc3 ENALAPRIL MALEATE	-0.127246
Smc3 ENOXACIN	-0.0953796
Smc3 ENTANDROPHRAGMIN	-0.0602261
Smc3 EPIGALLOCATECHIN-3-MONOGALLATE	0.00169923
Smc3 ERYTHROMYCIN ESTOLATE	-0.020607
Smc3 ERYTHROMYCIN STEARATE	-0.120491
Smc3 ESCITALOPRAM OXALATE	0.1446
Smc3 ESTRADIOL ACETATE	-0.0151262
Smc3 ESTRADIOL BENZOATE	-0.0366687
Smc3 ESTRAMUSTINE	-0.0141702
Smc3 ETHANOLAMINE OLEATE	0.107719
Smc3 ETHAVERINE HYDROCHLORIDE	-0.0266773
Smc3 ETHISTERONE	0.240874
Smc3 ETHOSUXIMIDE	-0.118094
Smc3 ETHYL PARABEN	-0.0885044
Smc3 ETHYL VANILLIN	0.0937359
Smc3 ETIDRONATE DISODIUM	-0.0841538
Smc3 EZETIMIBE	0.0122221
Smc3 FAMCICLOVIR	-0.0130625
Smc3 FAMPROFAZONE	-0.136693
Smc3 FENBUTYRAMIDE	-0.0551572
Smc3 FENDILINE HYDROCHLORIDE	-0.139753
Smc3 FENTHION	-0.0904416
Smc3 FIROCOXIB	0.17697
Smc3 FLOPROPIONE	-0.0127139
Smc3 FLOXURIDINE	0.393031
Smc3 FLUMETHASONE	-0.159308
Smc3 FLUNISOLIDE	-0.0233821
Smc3 FLURANDRENOLIDE	-0.0375752
Smc3 FLUROXENE	-0.0778219
Smc3 FLUVASTATIN SODIUM	-0.020281
Smc3 FOMEPIZOLE	-0.057763
Smc3 FOSCARNET SODIUM	-0.0413941
Smc3 FOSFOMYCIN CALCIUM	-0.198382
Smc3 FUCOSTANOL	0.0601499
Smc3 GALANTAMINE	-0.0885209
Smc3 gamma-AMINOBUTYRIC ACID HYDROCHLORIDE	-0.121206
Smc3 GARLICIN	-0.0214279
Smc3 GITOXIGENIN	-0.0182426
Smc3 GITOXIGENIN DIACETATE	0.470815
Smc3 GLAFENINE	-0.0124852
Smc3 GLUCONOLACTONE	-0.0565763
Smc3 GLYCYLGLYCINE	0.0846793
Smc3 HAEMATOXYLIN	-0.00752961
Smc3 HALCINONIDE	0.0967091
Smc3 HECOGENIN ACETATE	-0.111763
Smc3 HEXESTROL	-0.070037
Smc3 HEXETIDINE	-0.043889
Smc3 HIERACIN	-0.0850643
Smc3 HYCANTHONE	0.19625
Smc3 HYDRASTININE HYDROCHLORIDE	-0.0886852
Smc3 HYDROXYAMPHETAMINE HYDROBROMIDE	-0.015702
Smc3 HYDROXYCHLOROQUINE SULFATE	-0.00951982
Smc3 HYDROXYTOLUIC ACID	-0.125257
Smc3 IDAZOXAN HYDROCHLORIDE	-0.120221
Smc3 IMEXON	0.0132781
Smc3 IMIQUIMOD HYDROCHLORIDE	-0.0497392
Smc3 INAMRINONE	0.0532778
Smc3 INDINAVIR SULFATE	-0.071796
Smc3 IOTHALAMIC ACID	0.0247362
Smc3 IPRIFLAVONE	-0.057266
Smc3 IPRONIAZID PHOSPHATE	-0.0545714
Smc3 ISOBUTAMBEN	0.146961
Smc3 ISOBUTYLMETHYLXANTHINE	-0.0539047
Smc3 ISOCOTOIN	0.108941
Smc3 ISOFLAVONE	0.031158
Smc3 ISOGUVACINE HYDROCHLORIDE	0.000227306
Smc3 ISOTRETINON	-0.0775866
Smc3 ISOVALERAMIDE	0.112946
Smc3 ISOXICAM	-0.0346701
Smc3 JUAREZIC ACID	-0.0568609
Smc3 KETANSERIN TARTRATE	0.0654913
Smc3 KETOPROFEN	-0.0925235
Smc3 KHELLIN	-0.0537116
Smc3 LABETALOL HYDROCHLORIDE	0.0947634
Smc3 LACITOL	-0.00458367
Smc3 LACTOBIONIC ACID	-0.0371043
Smc3 LANATOSIDE C	0.42885
Smc3 LARIXOL ACETATE	-0.0946327
Smc3 LASALOCID SODIUM	-0.0594946
Smc3 LEOIDIN	0.0126709
Smc3 LEVAMISOLE HYDROCHLORIDE	-0.0657023
Smc3 LINAGLIPTIN HYDROCHLORIDE	-0.017631
Smc3 LINAMARIN	-0.0984332
Smc3 LINDANE	-0.0460765
Smc3 LISINOPRIL	-0.0751898
Smc3 LITHOCHOLIC ACID	-0.0974355
Smc3 LOBELINE HYDROCHLORIDE	-0.0753156
Smc3 LOPERAMIDE HYDROCHLORIDE	-0.0431286
Smc3 LORGLUMIDE SODIUM	0.00715775
Smc3 MALATHION	-0.0419557
Smc3 MAPROTILINE HYDROCHLORIDE	0.0312429
Smc3 MEBHYDROLIN	-0.141682
Smc3 MECHLORETHAMINE	0.0911654
Smc3 MECLIZINE HYDROCHLORIDE	0.0298312
Smc3 MECYSTEINE HYDROCHLORIDE	-0.10526
Smc3 MEDRYSONE	0.177184
Smc3 MEFLOQUINE	0.039477
Smc3 MEGESTROL ACETATE	0.131067
Smc3 MELATONIN	-0.0142269
Smc3 MENADIONE	-0.0977526
Smc3 MENTHONE	0.0424149
Smc3 MENTHYL BENZOATE	-0.00251173
Smc3 MEPRYLCAINE HYDROCHLORIDE	-0.197819
Smc3 MESNA	-0.096556
Smc3 meta-CRESYL ACETATE	0.0053699
Smc3 METARAMINOL BITARTRATE	-0.00175196
Smc3 METHAPYRILENE HYDROCHLORIDE	0.123692
Smc3 METHAZOLAMIDE	-0.156989
Smc3 METHOXYVONE	0.0184352
Smc3 METHYL CHOLATE	-0.0013786
Smc3 METHYL DEOXYCHOLATE	0.0772898
Smc3 METHYSERGIDE MALEATE	-0.0583637
Smc3 MEVASTATIN	0.0857636
Smc3 MITOTANE	-0.0625298
Smc3 MODAFINIL	-0.112629
Smc3 MOMETASONE FUROATE	-0.000379232
Smc3 MONOBENZONE	-0.114238
Smc3 MONOCROTALINE	-0.0876446
Smc3 N-METHYLBENZYLAMINE HYDROCHLORIDE	0.117272
Smc3 N-PHENYLANTHRANILIC ACID	-0.0509306
Smc3 NANOFIN	-0.0119956
Smc3 NARASIN	-0.0423237
Smc3 NEOSTIGMINE METHYLSULFATE	0.00836241
Smc3 NIALAMIDE	-0.0817826
Smc3 NICOTINE BITARTRATE	0.061979
Smc3 NICOTINYL ALCOHOL TARTRATE	-0.0272146
Smc3 NIFUROXAZIDE	0.00470521
Smc3 NITROXOLINE	-0.0546163
Smc3 NOCODAZOLE	0.479806
Smc3 NOMIFENSINE MALEATE	-0.0225724
Smc3 NONOXYNOL-9	0.00826256
Smc3 NOREPINEPHRINE TARTRATE	-0.136818
Smc3 NORETHINDRONE	-0.0233557
Smc3 NORETHINDRONE ACETATE	-0.0560093
Smc3 NORETHYNODREL	-0.129502
Smc3 NORFLOXACIN	-0.0593735
Smc3 NORGESTREL	-0.063558
Smc3 NORTRIPTYLINE HYDROCHLORIDE	-0.0447702
Smc3 NOSCAPINE HYDROCHLORIDE	-0.0685253
Smc3 NOVOBIOCIN SODIUM	-0.0930317
Smc3 NYLIDRIN HYDROCHLORIDE	-0.112518
Smc3 NYSTATIN	-0.13395
Smc3 OCTOCRYLENE	-0.00548233
Smc3 OCTODRINE	-0.0926783
Smc3 OCTOPAMINE HYDROCHLORIDE	-0.0175322
Smc3 OLANZAPINE	-0.0227653
Smc3 OLEANOLIC ACID ACETATE	0.152951
Smc3 OLMESARTAN	0.123626
Smc3 OLMESARTAN MEDOXOMIL	0.0516536
Smc3 OMEGA-3-ACID ESTERS (EPA shown)	-0.00155717
Smc3 ONDANSETRON	-0.103314
Smc3 ORPHENADRINE CITRATE	-0.120554
Smc3 OXACILLIN SODIUM	-0.114383
Smc3 OXAPROZIN	-0.0286246
Smc3 OXELAIDIN CITRATE	-0.0452951
Smc3 OXFENDAZOLE	0.129288
Smc3 OXICONAZOLE NITRATE	0.124607
Smc3 OXIDOPAMINE HYDROCHLORIDE	-0.0910996
Smc3 OXOLINIC ACID	-0.130175
Smc3 OXYBENZONE	-0.201504
Smc3 OXYCLOZANIDE	-0.104749
Smc3 OXYMETAZOLINE HYDROCHLORIDE	-0.0592473
Smc3 OXYPHENBUTAZONE	-0.0769316
Smc3 OXYPHENONIUM BROMIDE	-0.0576143
Smc3 OXYQUINOLINE HEMISULFATE	0.0569148
Smc3 OXYTETRACYCLINE	-0.00145998
Smc3 PACHYRRHIZIN	-0.0509366
Smc3 PANTETHINE	-0.123842
Smc3 PANTOPRAZOLE	0.0890132
Smc3 PAPAVERINE HYDROCHLORIDE	-0.0635937
Smc3 PARACHLOROPHENOL	-0.162236
Smc3 PARGYLINE HYDROCHLORIDE	-0.155567
Smc3 PAROXETINE HYDROCHLORIDE	0.0905801
Smc3 PARTHENOLIDE	0.176947
Smc3 PENICILLAMINE	0.0993395
Smc3 PENICILLAMINE METHYL ESTER HYDROCHLORIDE	-0.0349369
Smc3 PENICILLIN G POTASSIUM	-0.0410828
Smc3 PENICILLIN V POTASSIUM	-0.260379
Smc3 PENTAMIDINE ISETHIONATE	-0.040744
Smc3 PENTYLENETETRAZOL	-0.179966
Smc3 PERHEXILINE MALEATE	-0.035877
Smc3 PERINDOPRIL ERBUMINE	0.0050529
Smc3 PERMETHRIN	0.0140536
Smc3 PERSEITOL HEPTAACETATE	0.177502
Smc3 PHENACEMIDE	-0.0723509
Smc3 PHENAZOPYRIDINE HYDROCHLORIDE	-0.057516
Smc3 PHENELZINE SULFATE	-0.1232
Smc3 PHENINDIONE	-0.0912745
Smc3 PHENIRAMINE MALEATE	0.00798699
Smc3 PHENOLPHTHALEIN	-0.157675
Smc3 PHENOTHIAZINE	-0.124048
Smc3 PHENSUCCIMIDE	0.0159558
Smc3 PHENYLBUTAZONE	-0.124188
Smc3 PHENYLEPHRINE HYDROCHLORIDE	-0.0710181
Smc3 PHTHALYLSULFATHIAZOLE	-0.0998562
Smc3 PICOLAMINE	-0.0602171
Smc3 PIDOLIC ACID	-0.0682803
Smc3 PIMAGEDINE HYDROCHLORIDE	-0.0755426
Smc3 PINACIDIL	0.0334937
Smc3 PIPEMIDIC ACID	-0.0734148
Smc3 PIPERIDOLATE HYDROCHLORIDE	-0.00305493
Smc3 PIRACETAM	-0.033834
Smc3 PRALIDOXIME MESYLATE	-0.00621122
Smc3 PRASTERONE ACETATE	0.00560682
Smc3 PRASUGREL	-0.0959681
Smc3 PREGNENOLONE	-0.139155
Smc3 PROADIFEN HYDROCHLORIDE	-0.0710761
Smc3 PROPOXUR	-0.110477
Smc3 PROPRANOLOL HYDROCHLORIDE (+/-)	0.260992
Smc3 PROTOPORPHYRIN IX	-0.216292
Smc3 PROXYPHYLLINE	-0.021224
Smc3 PTAEROXYLIN	0.0134594
Smc3 PURPUROGALLIN	-0.0659964
Smc3 PYRIDOSTIGMINE BROMIDE	-0.0705197
Smc3 PYRITINOL	0.000168972
Smc3 QUETIAPINE	0.00126778
Smc3 QUINAPRIL HYDROCHLORIDE	0.183002
Smc3 QUININE ETHYL CARBONATE	0.0224812
Smc3 RAMIPRIL	-0.0861624
Smc3 RANITIDINE HYDROCHLORIDE	-0.0715195
Smc3 RANOLAZINE	-0.102538
Smc3 RAUWOLSCINE HYDROCHLORIDE	-0.123781
Smc3 RETINOL	-0.144721
Smc3 RHAMNETIN	-0.025482
Smc3 RIBOFLAVIN	-0.0940579
Smc3 RIBOFLAVIN 5-PHOSPHATE SODIUM	-0.115487
Smc3 RIFAXIMIN	-0.0442034
Smc3 RIMANTADINE HYDROCHLORIDE	-0.17197
Smc3 RITANSERIN	0.0933353
Smc3 RIZATRIPTAN BENZOATE	-0.0823002
Smc3 RONIDAZOLE	-0.151479
Smc3 ROSUVASTATIN CALCIUM	0.00654356
Smc3 RUTIN	-0.023905
Smc3 S-ISOCORYDINE (+)	-0.115653
Smc3 SACCHARIN	-0.0675185
Smc3 SALICIN	-0.0611687
Smc3 SALSOLIDINE	-0.069876
Smc3 SARAFLOXACIN HYDROCHLORIDE	0.209259
Smc3 SEROTONIN HYDROCHLORIDE	0.0896033
Smc3 SERTRALINE HYDROCHLORIDE	-0.114821
Smc3 SIBUTRAMINE HYDROCHLORIDE	-0.0276158
Smc3 SILDENAFIL CITRATE	0.0873276
Smc3 SITOSTERYL ACETATE	-0.0815968
Smc3 SPIPERONE	-0.0581022
Smc3 STIGMASTEROL	-0.0822739
Smc3 SUBERIC ACID	-0.0244006
Smc3 SUCCINYLSULFATHIAZOLE	-0.109515
Smc3 SUCRALOSE	-0.051697
Smc3 SULFAGUANIDINE	-0.0916586
Smc3 SULFAMETER	-0.0982652
Smc3 SULFAMETHOXYPYRIDAZINE	-0.0878555
Smc3 SULFANILAMIDE	-0.0193626
Smc3 SULFAPHENAZOLE	-0.075574
Smc3 SULOCTIDIL	-0.0762939
Smc3 SUMATRIPTAN	-0.0712044
Smc3 SURAMIN HEXASODIUM	-0.0468065
Smc3 SYMCLOSENE	0.0141037
Smc3 TANSHINONE IIA SULFONATE SODIUM	0.106586
Smc3 TEGASEROD MALEATE	-0.103978
Smc3 TELITHROMYCIN	0.0273889
Smc3 TELMISARTAN	0.41513
Smc3 TEMAZEPAM	-0.0279624
Smc3 TEMEFOS	0.140121
Smc3 TENOXICAM	-0.041702
Smc3 THIAMPHENICOL	-0.0800952
Smc3 THONZYLAMINE HYDROCHLORIDE	-0.146739
Smc3 TIAPRIDE HYDROCHLORIDE	0.111029
Smc3 TIGECYCLINE	0.0455567
Smc3 TIGOGENIN	0.0706382
Smc3 TINIDAZOLE	-0.0110861
Smc3 TOLAZAMIDE	-0.0595417
Smc3 TOLONIUM CHLORIDE	-0.0130933
Smc3 TOREMIFENE CITRATE	-0.0141922
Smc3 TORSEMIDE	0.137366
Smc3 TRANDOLAPRIL	-0.0140209
Smc3 TRAZODONE HYDROCHLORIDE	0.216653
Smc3 TRETINOIN	-0.0114046
Smc3 TRIACETYLRESVERATROL	-0.0946949
Smc3 TRICLABENDAZOLE	-0.139283
Smc3 TRIMETHADIONE	-0.0421761
Smc3 TRIMIPRAMINE MALEATE	0.270657
Smc3 TROCLOSENE SODIUM	0.0480261
Smc3 TROLEANDOMYCIN	-0.105706
Smc3 TROMETHAMINE	0.0180607
Smc3 TROSPIUM CHLORIDE	-0.0880738
Smc3 TYLOSIN TARTRATE	0.0778314
Smc3 TYROSINE HYDROCHLORIDE	0.111249
Smc3 UBIDECARENONE [5mM]	0.217156
Smc3 UNDECYLENIC ACID	-0.0548151
Smc3 VALACYCLOVIR HYDROCHLORIDE	0.0708246
Smc3 VALDECOXIB	-0.106342
Smc3 VALSARTAN	0.0683384
Smc3 VARDENAFIL HYDROCHLORIDE	-0.131146
Smc3 VERAPAMIL HYDROCHLORIDE	-0.00877134
Smc3 VINCAMINE	-0.0398384
Smc3 VINPOCETINE	-0.1078
Smc3 VIOMYCIN SULFATE	0.0203071
Smc3 XYLAZINE	-0.0893778
Smc3 XYLOSE	-0.0471235
Smc3 ZIDOVUDINE [AZT]	-0.0359691
Smc3 ZOLMITRIPTAN	-0.0741479
Smc3 ZOLPIDEM	0.278661
Stag2 '1,7-DIDEACETOXY-1,7-DIOXO-3-DEACETYLKHIVORIN'	0.0218393
Stag2 '18-AMINOABIETA-8,11,13-TRIENE SULFATE'	-0.109709
Stag2 '1S,2R-PHENYLPROPANOLAMINE HYDROCHLORIDE'	-0.0548525
Stag2 '2,3-DIMERCAPTOSUCCINIC ACID'	-0.0371497
Stag2 '4,6-DIMETHOXY-5-METHYLISOFLAVONE'	0.239834
Stag2 '5,2-DIMETHOXYFLAVONE'	-0.026813
Stag2 '6-(3,4-METHYLENEDIOXYSTYRYL)-alpha-PYRONE'	-0.0470478
Stag2 'ABSCISIC ACID (cis,trans; +/-)'	0.218757
Stag2 'BETAMETHASONE 17,21-DIPROPIONATE'	0.228442
Stag2 'DUARTIN, DIMETHYL ETHER'	0.0779248
Stag2 'ESTRADIOL-3-SULFATE, SODIUM SALT'	0.0664433
Stag2 'HETEROPEUCENIN, METHYL ETHER'	-0.0247597
Stag2 'KOPARIN 2,3-DIMETHYL ETHER'	-0.0544889
Stag2 1-(2-METHOXYPHENYL)PIERAZINE HYDROCHLORIDE	0.0203555
Stag2 1-MONOPALMITIN	-0.00136805
Stag2 2-MERCAPTOETHANOL	0.193672
Stag2 3-AMINOPROPIONITRILE FUMARATE	-0.0827412
Stag2 3-HYDROXY-4-(SUCCIN-2-YL)-CARYOLANE delta-LACTONE	-0.0802226
Stag2 3-HYDROXYBENZYLHYDRAZINE DIHYDROCHLORIDE	-0.000307147
Stag2 3-METHOXYCATECHOL	0.0356963
Stag2 3-METHYLORSELLINIC ACID	-0.00202339
Stag2 3-OXOURSAN(28-13)OLIDE	0.140942
Stag2 4-(3-BUTOXY-4-METHOXYBENZYL)IMIDAZOLIDIN-2-ONE	0.00764219
Stag2 4-DEMETHYLEPICROPODOPHYLLOTOXIN	0.52259
Stag2 5-CHLOROINDOLE-2-CARBOXYLIC ACID	-0.0256566
Stag2 7-DEACETOXY-7-OXOKHIVORIN	-0.0114036
Stag2 7-DEACETYLKHIVORIN	-0.0911358
Stag2 ACARBOSE	-0.0558822
Stag2 ACEDAPSONE	0.197036
Stag2 ACEGLUTAMIDE	-0.0358844
Stag2 ACEMETACIN	-0.0647828
Stag2 ACEPROMAZINE MALEATE	-0.0243665
Stag2 ACETARSOL	-0.0156208
Stag2 ACONITIC ACID	0.0553213
Stag2 ACTINOQUINOL SODIUM	-0.00594117
Stag2 ADIPHENINE HYDROCHLORIDE	0.0996854
Stag2 AJMALINE	-0.109378
Stag2 AKLOMIDE	0.135534
Stag2 ALFUZOSIN HYDROCHLORIDE	-0.0260614
Stag2 ALMOTRIPTAN	-0.0296521
Stag2 alpha-CYANO-3-HYDROXYCINNAMIC ACID	-0.0700609
Stag2 alpha-MANGOSTIN	-0.0901627
Stag2 ALPINETIN METHYL ETHER	0.126912
Stag2 ALPRENOLOL HYDROCHLORIDE	-0.0179337
Stag2 ALRESTATIN	-0.00119921
Stag2 ALTRETAMINE	-0.03844
Stag2 AMIFOSTINE	0.11893
Stag2 AMIKACIN HYDRATE	0.0504999
Stag2 AMINOETHYLISOTHIOUREA DIHYDROBROMIDE	-0.0388418
Stag2 AMINOHIPPURIC ACID	-0.0836762
Stag2 AMINOPYRINE	-0.0212881
Stag2 AMIODARONE HYDROCHLORIDE	-0.00256802
Stag2 AMITRAZ	0.121157
Stag2 AMLODIPINE BESYLATE	0.248996
Stag2 AMMONIUM LACTATE	-0.0505991
Stag2 ANGOLENSIN (R)	-0.0015251
Stag2 ANISINDIONE	-0.0761236
Stag2 ANTIAROL	-0.00105007
Stag2 APRAMYCIN SULFATE	0.285169
Stag2 ARACHIDONIC ACID	-0.0146292
Stag2 ARTESUNATE	0.0284371
Stag2 ARTHONIOIC ACID	0.0089947
Stag2 ASCORBIC ACID	-0.073955
Stag2 ASPARTAME	-0.104022
Stag2 ASTEMIZOLE	0.0227651
Stag2 ATOMOXETINE HYDROCHLORIDE	-0.117641
Stag2 AURIN TRICARBOXYLIC ACID	0.0229357
Stag2 AVANAFIL	-0.107383
Stag2 AZACITIDINE	0.283844
Stag2 AZASERINE	0.000106081
Stag2 AZELASTINE HYDROCHLORIDE	-0.157335
Stag2 AZLOCILLIN SODIUM	0.179344
Stag2 BACAMPICILLIN HYDROCHLORIDE	0.0274887
Stag2 BECLAMIDE	-0.0271893
Stag2 BEMOTRIZINOL	-0.0264267
Stag2 BENDROFLUMETHIAZIDE	0.191678
Stag2 BENFLUOREX HYDROCHLORIDE	-0.0635093
Stag2 BENFOTIAMINE	-0.00917844
Stag2 BENOXINATE HYDROCHLORIDE	-0.0064846
Stag2 BENZOIC ACID	-0.0363175
Stag2 BENZOYL PEROXIDE	-0.107878
Stag2 BENZYL BENZOATE	0.0952295
Stag2 BEPRIDIL HYDROCHLORIDE	-0.0480251
Stag2 BERBERINE CHLORIDE	-0.0349314
Stag2 BERGAPTEN	0.0985899
Stag2 BETAINE HYDROCHLORIDE	0.0347282
Stag2 BETAXALOL HYDROCHLORIDE	-0.0504074
Stag2 BEZAFIBRATE	-0.0628885
Stag2 BICUCULLINE (+)	0.138814
Stag2 BIFONAZOLE	0.0105957
Stag2 BILIRUBIN	0.0729047
Stag2 BIOTIN	0.00848276
Stag2 BRETYLIUM TOSYLATE	-0.0796024
Stag2 BRINZOLAMIDE	0.00605594
Stag2 BROMHEXINE HYDROCHLORIDE	0.0807415
Stag2 BROXYQUINOLINE	0.0659249
Stag2 BRUCINE	-0.114391
Stag2 BUFLOMEDIL HYDROCHLORIDE	-0.124805
Stag2 BUMETANIDE	-0.0172115
Stag2 BUTYLATED HYDROXYTOLUENE	0.104097
Stag2 CADAVERINE TARTRATE	-0.0225125
Stag2 CAMYLOFINE DIHYDROCHLORIDE	-0.0954775
Stag2 CANRENONE	0.0356964
Stag2 CARAPIN	-0.00702958
Stag2 CARBADOX	0.0527646
Stag2 CARBENOXOLONE SODIUM	-0.0608192
Stag2 CARBIDOPA	-0.0612598
Stag2 CARNITINE (dl) HYDROCHLORIDE	-0.111681
Stag2 CARPROFEN	-0.0308792
Stag2 CASANTHRANOL [cascaroside A shown]	0.063046
Stag2 CATECHIN PENTAACETATE	0.0936551
Stag2 CEFALONIUM	-0.0642979
Stag2 CEFAMANDOLE NAFATE	-0.0275521
Stag2 CEFAMANDOLE SODIUM	-0.0329078
Stag2 CEFDINIR	-0.0490731
Stag2 CEFDITORIN PIVOXIL	-0.101776
Stag2 CEFEPIME HYDROCHLORIDE	0.0840592
Stag2 CEFMENOXIME HYDROCHLORIDE	-0.0250592
Stag2 CEFMETAZOLE SODIUM	-0.0268692
Stag2 CEFONICID SODIUM	0.0386994
Stag2 CEFOPERAZONE	0.0348143
Stag2 CEFORANIDE	-0.0733241
Stag2 CEFOTETAN	-0.100442
Stag2 CEFOXITIN SODIUM	-0.0754227
Stag2 CEFPROZIL	-0.0498529
Stag2 CEFTIBUTEN	0.156085
Stag2 CEFTRIAXONE SODIUM TRIHYDRATE	-0.10521
Stag2 CEFUROXIME SODIUM	0.0499032
Stag2 CELLOBIOSE (D[+])	-0.112949
Stag2 CEPHALEXIN	0.010452
Stag2 CEPHALOSPORIN C Zn	-0.0573534
Stag2 CETIRIZINE HYDROCHLORIDE	0.00790794
Stag2 CHLORMADINONE ACETATE	0.14931
Stag2 CHLOROPYRAMINE HYDROCHLORIDE	-0.0589865
Stag2 CHLOROXINE	-0.0114868
Stag2 CHLORPROTHIXENE HYDROCHLORIDE	0.0223127
Stag2 CHLORPYRIFOS	-0.0608377
Stag2 CHLORQUINALDOL	0.137865
Stag2 CILOSTAZOL	-0.0158644
Stag2 CINCHONIDINE	-0.0864541
Stag2 CINCHONINE	-0.0225296
Stag2 CINNARAZINE	-0.079618
Stag2 CINROMIDE	-0.0750325
Stag2 CINTRIAMIDE	-0.111708
Stag2 CIPROFIBRATE	-0.0210213
Stag2 CLEMIZOLE HYDROCHLORIDE	-0.06696
Stag2 CLINAFOXACIN HYDROCHLORIDE	-0.0541861
Stag2 CLOFIBRIC ACID	-0.047834
Stag2 CLONAZEPAM	0.0255002
Stag2 CLOPIDOL	0.106779
Stag2 COUMOPHOS	-0.162345
Stag2 CREATININE	0.120398
Stag2 CROTAMITON	0.0907251
Stag2 CUELURE	-0.00425055
Stag2 CYCLOBENZAPRINE HYDROCHLORIDE	-0.0942554
Stag2 CYCLOHEXIMIDE	0.37699
Stag2 CYCLOSPORINE	-0.0225534
Stag2 CYROMAZINE	-0.0173805
Stag2 CYTIDINE TRIPHOSPHATE DISODIUM	0.233858
Stag2 D-PHENYLALANINE	-0.0141543
Stag2 DACTINOMYCIN	0.958838
Stag2 DANTROLENE SODIUM	-0.0138313
Stag2 DAPAGLIFLOZIN	-0.124131
Stag2 DEACETOXY-7-OXOGEDUNIN	0.0123702
Stag2 DEBRISOQUIN SULFATE	-0.0307877
Stag2 DEGUELIN(-)	-0.0357051
Stag2 DEHYDROABIETAMIDE	0.0333349
Stag2 DEHYDROACETIC ACID	0.00758255
Stag2 DEHYDRODIHYDROROTENONE	-0.0583827
Stag2 DEHYDROROTENONE	-0.0707094
Stag2 DERACOXIB	-0.0502885
Stag2 DEXTROAMPHETAMINE SULFATE	-0.0472875
Stag2 DIBEKACIN	-0.0443227
Stag2 DICHLORISONE ACETATE	-0.089566
Stag2 DICHLOROPHEN	0.0420136
Stag2 DICLORALUREA	-0.0532179
Stag2 DIETHYLTOLUAMIDE	0.0263806
Stag2 DIFFRACTAIC ACID	-0.00335302
Stag2 DIFLORASONE DIACETATE	-0.0122829
Stag2 DIFLUBENZURON	-0.0990636
Stag2 DIHYDROCELASTRYL DIACETATE	-0.140563
Stag2 DIHYDROFISSINOLIDE	-0.0138326
Stag2 DIHYDROGEDUNIN	-0.0369749
Stag2 DOXORUBICIN	-0.0236719
Stag2 DROFENINE HYDROCHLORIDE	-0.156607
Stag2 DRONEDARONE HYDROCHLORIDE	0.157924
Stag2 DROPROPIZINE	-0.0130419
Stag2 DULOXETINE HYDROCHLORIDE	-0.00566513
Stag2 ECONAZOLE NITRATE	-0.038542
Stag2 EDITOL	-0.0580031
Stag2 EDOXUDINE	0.160586
Stag2 ELETRIPTAN HYDROBROMIDE	-0.0228955
Stag2 ENALAPRIL MALEATE	0.0138717
Stag2 ENOXACIN	-0.137864
Stag2 ENTANDROPHRAGMIN	-0.0246344
Stag2 EPIGALLOCATECHIN-3-MONOGALLATE	0.105054
Stag2 ERYTHROMYCIN ESTOLATE	-0.0960744
Stag2 ERYTHROMYCIN STEARATE	0.0358903
Stag2 ESCITALOPRAM OXALATE	0.0407029
Stag2 ESTRADIOL ACETATE	0.0601563
Stag2 ESTRADIOL BENZOATE	-0.110238
Stag2 ESTRAMUSTINE	-0.000943018
Stag2 ETHANOLAMINE OLEATE	0.00944677
Stag2 ETHAVERINE HYDROCHLORIDE	-0.0818728
Stag2 ETHISTERONE	0.230783
Stag2 ETHOSUXIMIDE	0.0565745
Stag2 ETHYL PARABEN	0.0493073
Stag2 ETHYL VANILLIN	0.113124
Stag2 ETIDRONATE DISODIUM	-0.0886181
Stag2 EZETIMIBE	0.0931408
Stag2 FAMCICLOVIR	-0.0599852
Stag2 FAMPROFAZONE	-0.0646704
Stag2 FENBUTYRAMIDE	-0.0455922
Stag2 FENDILINE HYDROCHLORIDE	-0.0599151
Stag2 FENTHION	0.00394059
Stag2 FIROCOXIB	0.06607
Stag2 FLOPROPIONE	-0.0550009
Stag2 FLOXURIDINE	0.327904
Stag2 FLUMETHASONE	-0.0906196
Stag2 FLUNISOLIDE	-0.0235353
Stag2 FLURANDRENOLIDE	-0.0187346
Stag2 FLUROXENE	-0.0129415
Stag2 FLUVASTATIN SODIUM	0.0319676
Stag2 FOMEPIZOLE	-0.000596106
Stag2 FOSCARNET SODIUM	-0.0501592
Stag2 FOSFOMYCIN CALCIUM	-0.0203651
Stag2 FUCOSTANOL	0.00648238
Stag2 GALANTAMINE	-0.030255
Stag2 gamma-AMINOBUTYRIC ACID HYDROCHLORIDE	-0.0355089
Stag2 GARLICIN	-0.0245481
Stag2 GITOXIGENIN	0.0229392
Stag2 GITOXIGENIN DIACETATE	0.437574
Stag2 GLAFENINE	-0.0484292
Stag2 GLUCONOLACTONE	-0.148419
Stag2 GLYCYLGLYCINE	0.0458564
Stag2 HAEMATOXYLIN	-0.0386877
Stag2 HALCINONIDE	0.169624
Stag2 HECOGENIN ACETATE	-0.101211
Stag2 HEXESTROL	-0.0589148
Stag2 HEXETIDINE	-0.0872185
Stag2 HIERACIN	-0.0522294
Stag2 HYCANTHONE	0.237666
Stag2 HYDRASTININE HYDROCHLORIDE	-0.0542126
Stag2 HYDROXYAMPHETAMINE HYDROBROMIDE	-0.00565618
Stag2 HYDROXYCHLOROQUINE SULFATE	0.0116684
Stag2 HYDROXYTOLUIC ACID	-0.0505797
Stag2 IDAZOXAN HYDROCHLORIDE	-0.0957059
Stag2 IMEXON	0.0642762
Stag2 IMIQUIMOD HYDROCHLORIDE	-0.0365924
Stag2 INAMRINONE	0.0809437
Stag2 INDINAVIR SULFATE	-0.0759152
Stag2 IOTHALAMIC ACID	-0.070729
Stag2 IPRIFLAVONE	-0.0575562
Stag2 IPRONIAZID PHOSPHATE	-0.0170511
Stag2 ISOBUTAMBEN	0.17973
Stag2 ISOBUTYLMETHYLXANTHINE	-0.0113027
Stag2 ISOCOTOIN	0.19077
Stag2 ISOFLAVONE	-0.00222057
Stag2 ISOGUVACINE HYDROCHLORIDE	-0.00479094
Stag2 ISOTRETINON	-0.0199481
Stag2 ISOVALERAMIDE	0.0849351
Stag2 ISOXICAM	-0.107185
Stag2 JUAREZIC ACID	-0.0645392
Stag2 KETANSERIN TARTRATE	0.0477725
Stag2 KETOPROFEN	-0.140143
Stag2 KHELLIN	0.00052681
Stag2 LABETALOL HYDROCHLORIDE	0.0823439
Stag2 LACITOL	-0.0623462
Stag2 LACTOBIONIC ACID	-0.0270654
Stag2 LANATOSIDE C	0.353555
Stag2 LARIXOL ACETATE	0.0507047
Stag2 LASALOCID SODIUM	0.0215132
Stag2 LEOIDIN	0.00851726
Stag2 LEVAMISOLE HYDROCHLORIDE	-0.105164
Stag2 LINAGLIPTIN HYDROCHLORIDE	-0.130684
Stag2 LINAMARIN	-0.0543016
Stag2 LINDANE	-0.0712046
Stag2 LISINOPRIL	-0.0617492
Stag2 LITHOCHOLIC ACID	-0.0114309
Stag2 LOBELINE HYDROCHLORIDE	-0.0991361
Stag2 LOPERAMIDE HYDROCHLORIDE	0.0477338
Stag2 LORGLUMIDE SODIUM	0.174101
Stag2 MALATHION	0.0126408
Stag2 MAPROTILINE HYDROCHLORIDE	-0.0249242
Stag2 MEBHYDROLIN	-0.0882946
Stag2 MECHLORETHAMINE	0.126987
Stag2 MECLIZINE HYDROCHLORIDE	-0.0281155
Stag2 MECYSTEINE HYDROCHLORIDE	-0.0564604
Stag2 MEDRYSONE	0.0623962
Stag2 MEFLOQUINE	0.131218
Stag2 MEGESTROL ACETATE	0.172871
Stag2 MELATONIN	-0.0429156
Stag2 MENADIONE	-0.0673306
Stag2 MENTHONE	-0.0171514
Stag2 MENTHYL BENZOATE	-0.0307984
Stag2 MEPRYLCAINE HYDROCHLORIDE	-0.129294
Stag2 MESNA	-0.0674511
Stag2 meta-CRESYL ACETATE	-0.0606616
Stag2 METARAMINOL BITARTRATE	0.0621815
Stag2 METHAPYRILENE HYDROCHLORIDE	0.149638
Stag2 METHAZOLAMIDE	-0.0116411
Stag2 METHOXYVONE	-0.0111422
Stag2 METHYL CHOLATE	0.0307238
Stag2 METHYL DEOXYCHOLATE	0.0839693
Stag2 METHYSERGIDE MALEATE	-0.100092
Stag2 MEVASTATIN	0.0276771
Stag2 MITOTANE	0.0025508
Stag2 MODAFINIL	-0.0144726
Stag2 MOMETASONE FUROATE	0.0749697
Stag2 MONOBENZONE	0.00098556
Stag2 MONOCROTALINE	-0.00256579
Stag2 N-METHYLBENZYLAMINE HYDROCHLORIDE	0.0892407
Stag2 N-PHENYLANTHRANILIC ACID	-0.0183381
Stag2 NANOFIN	-0.104273
Stag2 NARASIN	-0.0160579
Stag2 NEOSTIGMINE METHYLSULFATE	0.0570717
Stag2 NIALAMIDE	-0.0546871
Stag2 NICOTINE BITARTRATE	0.204665
Stag2 NICOTINYL ALCOHOL TARTRATE	-0.103687
Stag2 NIFUROXAZIDE	-0.0625172
Stag2 NITROXOLINE	0.0470116
Stag2 NOCODAZOLE	0.528044
Stag2 NOMIFENSINE MALEATE	-0.0549337
Stag2 NONOXYNOL-9	-0.0662934
Stag2 NOREPINEPHRINE TARTRATE	-0.0142576
Stag2 NORETHINDRONE	-0.0059625
Stag2 NORETHINDRONE ACETATE	-0.0127385
Stag2 NORETHYNODREL	-0.0590143
Stag2 NORFLOXACIN	-0.0849548
Stag2 NORGESTREL	0.0128547
Stag2 NORTRIPTYLINE HYDROCHLORIDE	-0.110552
Stag2 NOSCAPINE HYDROCHLORIDE	-0.0880729
Stag2 NOVOBIOCIN SODIUM	-0.0609095
Stag2 NYLIDRIN HYDROCHLORIDE	-0.032293
Stag2 NYSTATIN	-0.0212269
Stag2 OCTOCRYLENE	-0.0115513
Stag2 OCTODRINE	-0.0614508
Stag2 OCTOPAMINE HYDROCHLORIDE	-0.0138669
Stag2 OLANZAPINE	-0.0337874
Stag2 OLEANOLIC ACID ACETATE	0.252681
Stag2 OLMESARTAN	0.201753
Stag2 OLMESARTAN MEDOXOMIL	0.0915697
Stag2 OMEGA-3-ACID ESTERS (EPA shown)	-0.0231311
Stag2 ONDANSETRON	-0.0249153
Stag2 ORPHENADRINE CITRATE	-0.0233305
Stag2 OXACILLIN SODIUM	-0.0144726
Stag2 OXAPROZIN	-0.026995
Stag2 OXELAIDIN CITRATE	-0.0723896
Stag2 OXFENDAZOLE	0.160389
Stag2 OXICONAZOLE NITRATE	0.101657
Stag2 OXIDOPAMINE HYDROCHLORIDE	0.0238964
Stag2 OXOLINIC ACID	-0.107717
Stag2 OXYBENZONE	-0.0788997
Stag2 OXYCLOZANIDE	-0.0726463
Stag2 OXYMETAZOLINE HYDROCHLORIDE	-0.110562
Stag2 OXYPHENBUTAZONE	-0.0732198
Stag2 OXYPHENONIUM BROMIDE	-0.057652
Stag2 OXYQUINOLINE HEMISULFATE	-0.0139785
Stag2 OXYTETRACYCLINE	-0.0886729
Stag2 PACHYRRHIZIN	0.0169424
Stag2 PANTETHINE	-0.00572877
Stag2 PANTOPRAZOLE	0.025265
Stag2 PAPAVERINE HYDROCHLORIDE	-0.0020433
Stag2 PARACHLOROPHENOL	-0.0249855
Stag2 PARGYLINE HYDROCHLORIDE	-0.0409096
Stag2 PAROXETINE HYDROCHLORIDE	0.138849
Stag2 PARTHENOLIDE	0.259977
Stag2 PENICILLAMINE	0.0226787
Stag2 PENICILLAMINE METHYL ESTER HYDROCHLORIDE	-0.0785999
Stag2 PENICILLIN G POTASSIUM	-0.10553
Stag2 PENICILLIN V POTASSIUM	-0.0759643
Stag2 PENTAMIDINE ISETHIONATE	-0.0591659
Stag2 PENTYLENETETRAZOL	-0.0596577
Stag2 PERHEXILINE MALEATE	-0.0342393
Stag2 PERINDOPRIL ERBUMINE	-0.071543
Stag2 PERMETHRIN	-0.00226695
Stag2 PERSEITOL HEPTAACETATE	0.227999
Stag2 PHENACEMIDE	0.00953256
Stag2 PHENAZOPYRIDINE HYDROCHLORIDE	-0.0404274
Stag2 PHENELZINE SULFATE	-0.0551475
Stag2 PHENINDIONE	-0.0110823
Stag2 PHENIRAMINE MALEATE	-0.0765183
Stag2 PHENOLPHTHALEIN	-0.0310462
Stag2 PHENOTHIAZINE	-0.0496423
Stag2 PHENSUCCIMIDE	-0.024998
Stag2 PHENYLBUTAZONE	-0.0207282
Stag2 PHENYLEPHRINE HYDROCHLORIDE	-0.0813273
Stag2 PHTHALYLSULFATHIAZOLE	-0.0132058
Stag2 PICOLAMINE	-0.0597132
Stag2 PIDOLIC ACID	-0.118964
Stag2 PIMAGEDINE HYDROCHLORIDE	-0.014805
Stag2 PINACIDIL	0.0954708
Stag2 PIPEMIDIC ACID	0.00757087
Stag2 PIPERIDOLATE HYDROCHLORIDE	-0.0568591
Stag2 PIRACETAM	-0.00328241
Stag2 PRALIDOXIME MESYLATE	-0.0346509
Stag2 PRASTERONE ACETATE	0.0133883
Stag2 PRASUGREL	-0.0983953
Stag2 PREGNENOLONE	-0.0563152
Stag2 PROADIFEN HYDROCHLORIDE	-0.0649589
Stag2 PROPOXUR	-0.0224925
Stag2 PROPRANOLOL HYDROCHLORIDE (+/-)	0.264906
Stag2 PROTOPORPHYRIN IX	-0.0282265
Stag2 PROXYPHYLLINE	-0.0617945
Stag2 PTAEROXYLIN	0.0267932
Stag2 PURPUROGALLIN	-0.00058804
Stag2 PYRIDOSTIGMINE BROMIDE	0.0272169
Stag2 PYRITINOL	-0.0112614
Stag2 QUETIAPINE	-0.122479
Stag2 QUINAPRIL HYDROCHLORIDE	0.0999257
Stag2 QUININE ETHYL CARBONATE	-0.093452
Stag2 RAMIPRIL	-0.0901862
Stag2 RANITIDINE HYDROCHLORIDE	-0.0881733
Stag2 RANOLAZINE	-0.0570481
Stag2 RAUWOLSCINE HYDROCHLORIDE	-0.0655333
Stag2 RETINOL	-0.0433363
Stag2 RHAMNETIN	-0.0504108
Stag2 RIBOFLAVIN	-0.0591489
Stag2 RIBOFLAVIN 5-PHOSPHATE SODIUM	-0.103331
Stag2 RIFAXIMIN	-0.0617024
Stag2 RIMANTADINE HYDROCHLORIDE	-0.0828048
Stag2 RITANSERIN	0.154944
Stag2 RIZATRIPTAN BENZOATE	0.0081829
Stag2 RONIDAZOLE	-0.0640137
Stag2 ROSUVASTATIN CALCIUM	-0.000943453
Stag2 RUTIN	-0.00411026
Stag2 S-ISOCORYDINE (+)	-0.0287658
Stag2 SACCHARIN	-0.131644
Stag2 SALICIN	-0.0260258
Stag2 SALSOLIDINE	-0.0656885
Stag2 SARAFLOXACIN HYDROCHLORIDE	0.149287
Stag2 SEROTONIN HYDROCHLORIDE	0.0982957
Stag2 SERTRALINE HYDROCHLORIDE	0.0113631
Stag2 SIBUTRAMINE HYDROCHLORIDE	0.00748
Stag2 SILDENAFIL CITRATE	0.0306786
Stag2 SITOSTERYL ACETATE	-0.0235385
Stag2 SPIPERONE	-0.0271923
Stag2 STIGMASTEROL	-0.0850018
Stag2 SUBERIC ACID	-0.0283104
Stag2 SUCCINYLSULFATHIAZOLE	0.00343248
Stag2 SUCRALOSE	-0.0311118
Stag2 SULFAGUANIDINE	-0.0995456
Stag2 SULFAMETER	-0.015581
Stag2 SULFAMETHOXYPYRIDAZINE	-0.0586543
Stag2 SULFANILAMIDE	-0.0794027
Stag2 SULFAPHENAZOLE	-0.118651
Stag2 SULOCTIDIL	-0.0645093
Stag2 SUMATRIPTAN	-0.0965887
Stag2 SURAMIN HEXASODIUM	-0.0945703
Stag2 SYMCLOSENE	-0.0291338
Stag2 TANSHINONE IIA SULFONATE SODIUM	0.0701736
Stag2 TEGASEROD MALEATE	0.00777343
Stag2 TELITHROMYCIN	0.0587798
Stag2 TELMISARTAN	0.243281
Stag2 TEMAZEPAM	-0.0420326
Stag2 TEMEFOS	0.231744
Stag2 TENOXICAM	0.00738173
Stag2 THIAMPHENICOL	-0.0283707
Stag2 THONZYLAMINE HYDROCHLORIDE	-0.00980134
Stag2 TIAPRIDE HYDROCHLORIDE	0.170786
Stag2 TIGECYCLINE	-0.0119004
Stag2 TIGOGENIN	-0.0204161
Stag2 TINIDAZOLE	-0.0159842
Stag2 TOLAZAMIDE	-0.0229823
Stag2 TOLONIUM CHLORIDE	0.125269
Stag2 TOREMIFENE CITRATE	-0.0339658
Stag2 TORSEMIDE	0.0635227
Stag2 TRANDOLAPRIL	0.0172193
Stag2 TRAZODONE HYDROCHLORIDE	0.230325
Stag2 TRETINOIN	-0.00791878
Stag2 TRIACETYLRESVERATROL	-0.00527409
Stag2 TRICLABENDAZOLE	-0.0333033
Stag2 TRIMETHADIONE	-0.0231108
Stag2 TRIMIPRAMINE MALEATE	0.259154
Stag2 TROCLOSENE SODIUM	0.150565
Stag2 TROLEANDOMYCIN	-0.00289141
Stag2 TROMETHAMINE	-0.00854831
Stag2 TROSPIUM CHLORIDE	-0.00416882
Stag2 TYLOSIN TARTRATE	0.124049
Stag2 TYROSINE HYDROCHLORIDE	0.116152
Stag2 UBIDECARENONE [5mM]	0.134233
Stag2 UNDECYLENIC ACID	-0.0054353
Stag2 VALACYCLOVIR HYDROCHLORIDE	0.0600913
Stag2 VALDECOXIB	-0.0719948
Stag2 VALSARTAN	0.0559045
Stag2 VARDENAFIL HYDROCHLORIDE	-0.0284661
Stag2 VERAPAMIL HYDROCHLORIDE	0.0172025
Stag2 VINCAMINE	-0.0509724
Stag2 VINPOCETINE	-0.0229094
Stag2 VIOMYCIN SULFATE	0.0221289
Stag2 XYLAZINE	0.0315008
Stag2 XYLOSE	-0.0885204
Stag2 ZIDOVUDINE [AZT]	-0.064658
Stag2 ZOLMITRIPTAN	-0.0243451
Stag2 ZOLPIDEM	0.208464
