# Supplementary figures and images for: Cohesin mutations are synthetic lethal with stimulation of WNT signaling
Source: eLife journal article supplement (doi:10.7554/elife.61405), 2020-12-07

**A**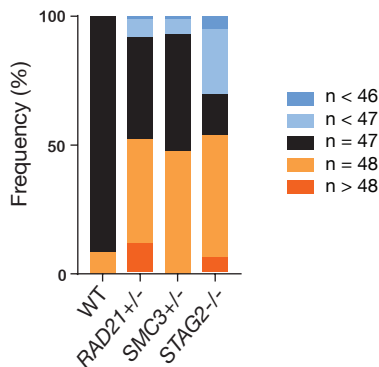**B**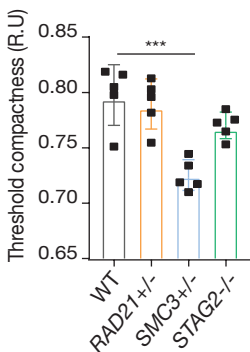**C**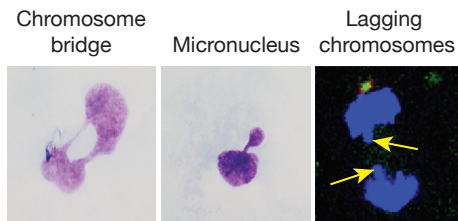**D**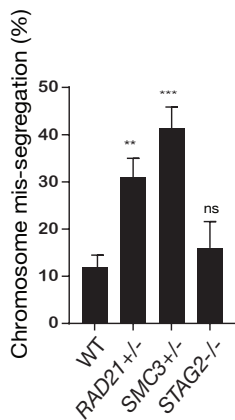**E**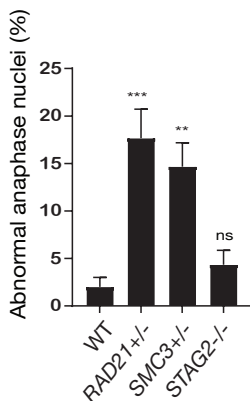

Supplement: supp [file elife_poa_e61405_Figure_2_figure_supplement_1.pdf › elife_poa_e61405_Figure_2_figure_supplement_1.pdf]

Confluence

Low

WT

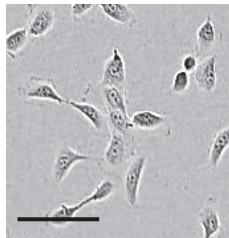

*RAD21*<sup>+/-</sup>

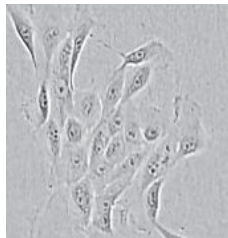

*SMC3*<sup>+/-</sup>

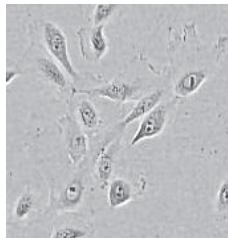

*STAG2*<sup>-/-</sup>

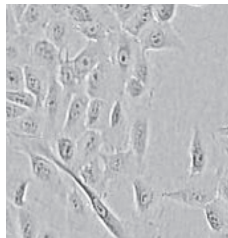

High

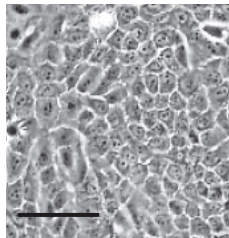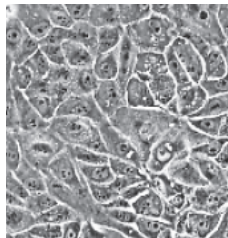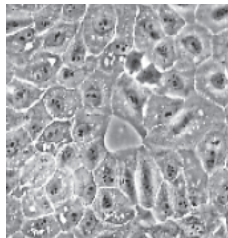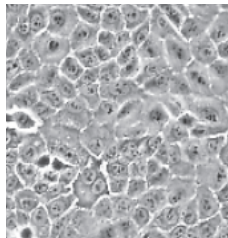

Supplement: supp [file elife_poa_e61405_Figure_2_figure_supplement_2.pdf › elife_poa_e61405_Figure_2_figure_supplement_2.pdf]

**A**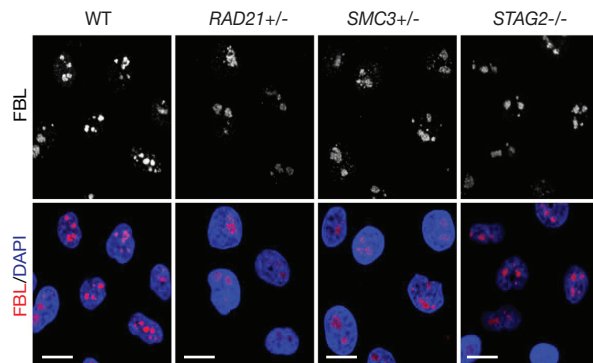**B**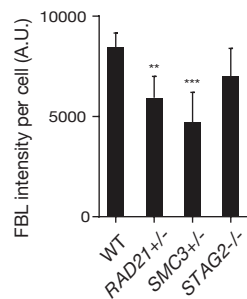**C**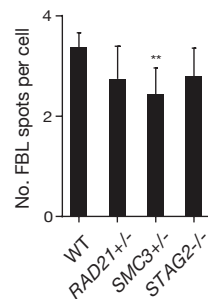**D**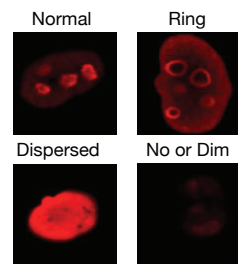**E**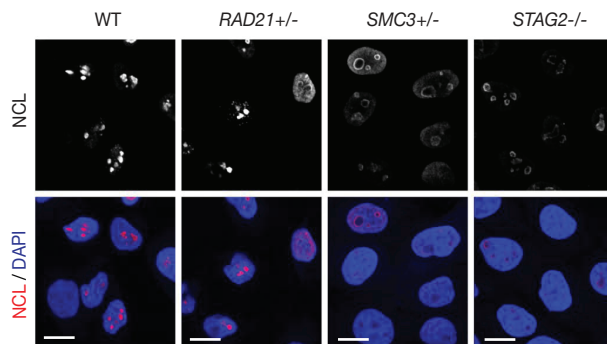**F**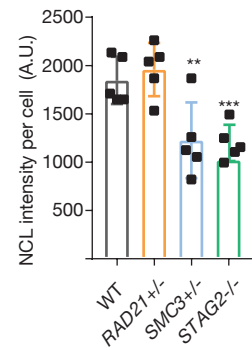**G**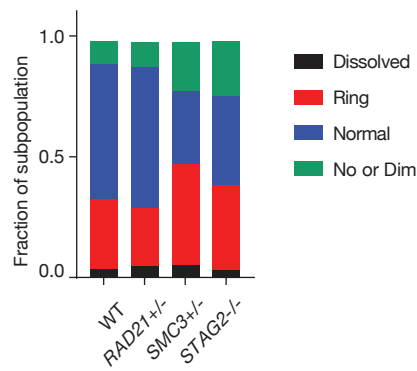

Supplement: supp [file elife_poa_e61405_Figure_3_figure_supplement_1.pdf › elife_poa_e61405_Figure_3_figure_supplement_1.pdf]

# Olaparib 1 $\mu$ M

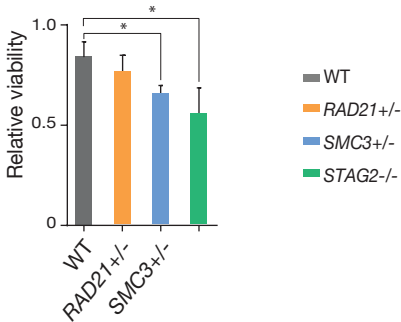

Supplement: supp [file elife_poa_e61405_Figure_3_figure_supplement_2.pdf › elife_poa_e61405_Figure_3_figure_supplement_2.pdf]

**A**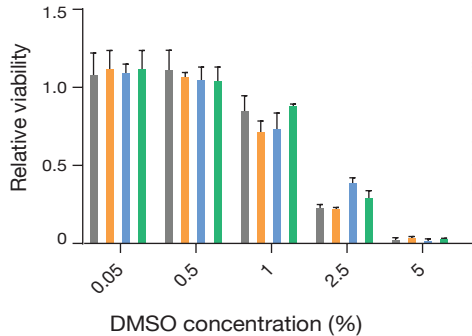**B**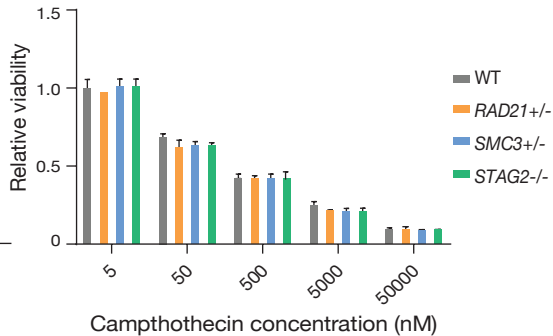

Supplement: supp [file elife_poa_e61405_Figure_4_figure_supplement_1.pdf › elife_poa_e61405_Figure_4_figure_supplement_1.pdf]

**A**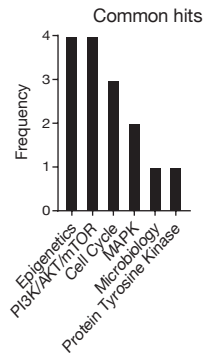**B**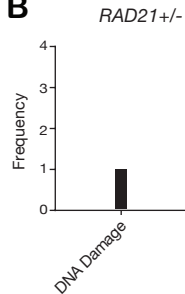**C**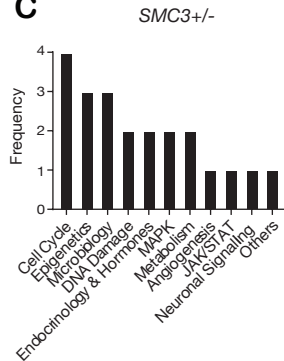**D**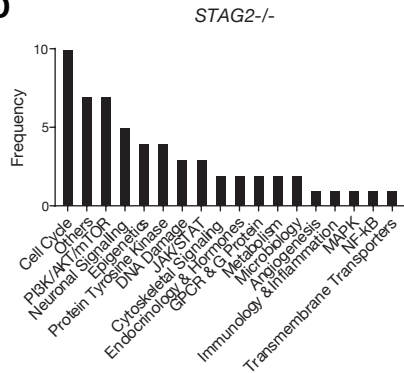**E**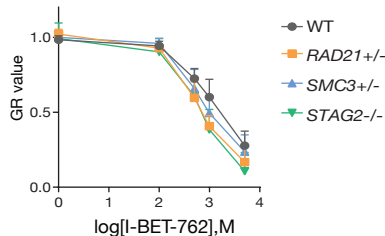**F**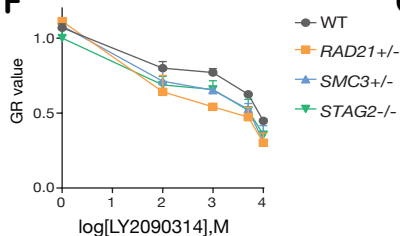**G**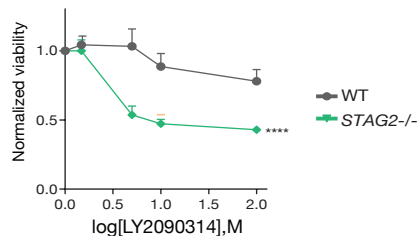

Supplement: supp [file elife_poa_e61405_Figure_4_figure_supplement_2.pdf › elife_poa_e61405_Figure_4_figure_supplement_2.pdf]

**A****Membrane fraction**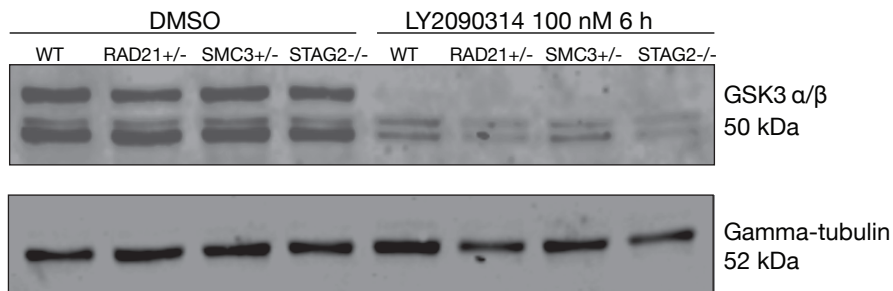**B****Cytoplasmic fraction**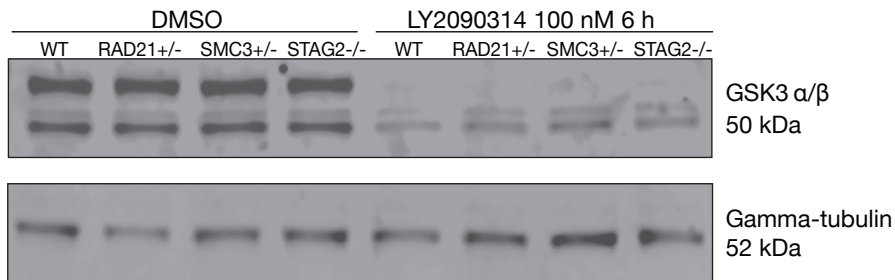

Supplement: supp [file elife_poa_e61405_Figure_5_figure_supplement_1.pdf › elife_poa_e61405_Figure_5_figure_supplement_1.pdf]

**A****Membrane fraction**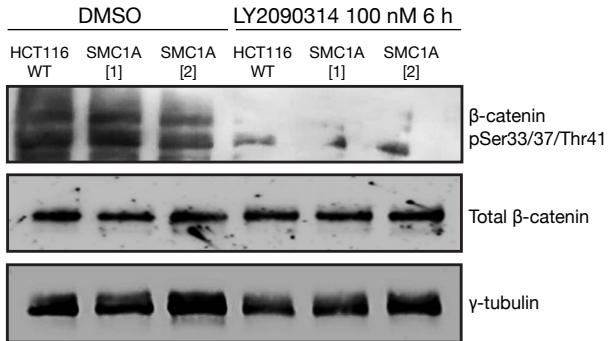**B****Cytoplasmic fraction**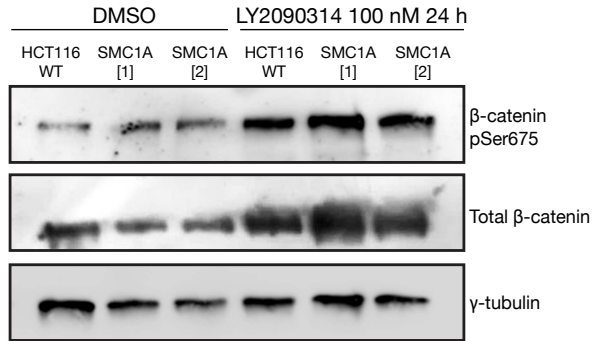

Supplement: supp [file elife_poa_e61405_Figure_5_figure_supplement_2.pdf › elife_poa_e61405_Figure_5_figure_supplement_2.pdf]

**A**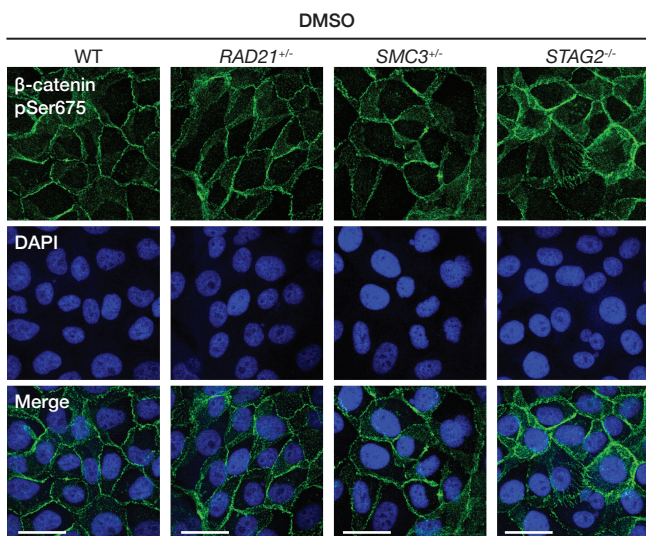**B**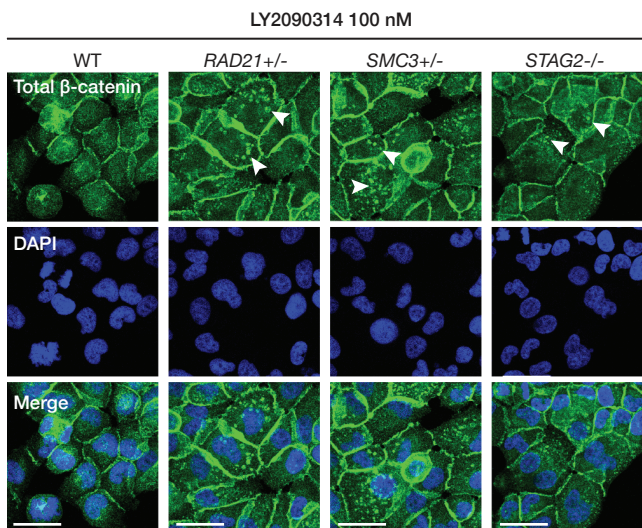**C**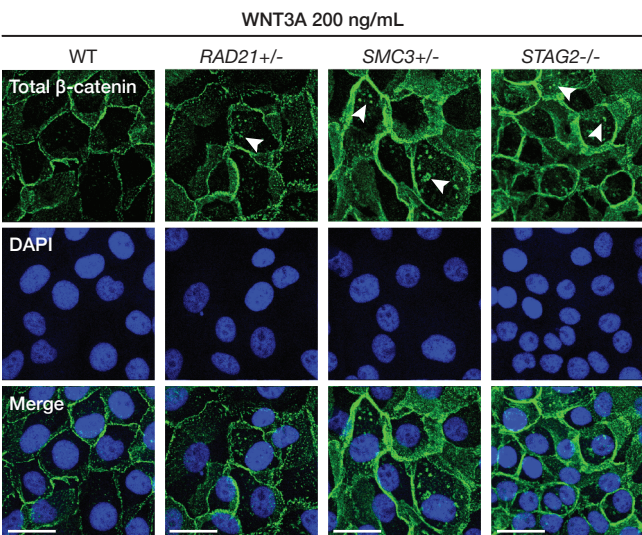

Supplement: supp [file elife_poa_e61405_Figure_5_figure_supplement_3.pdf › elife_poa_e61405_Figure_5_figure_supplement_3.pdf]

Figure 4 - Source Data 3

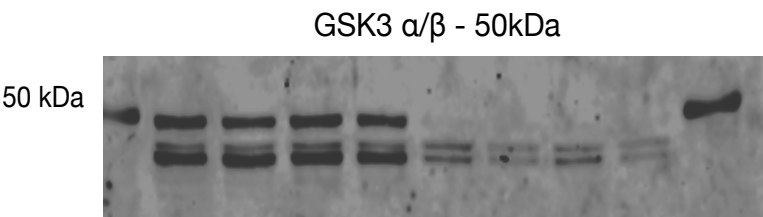

Figure 4S1A (top)

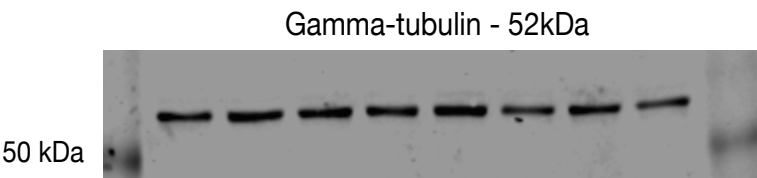

Figure 4S1A (bottom)

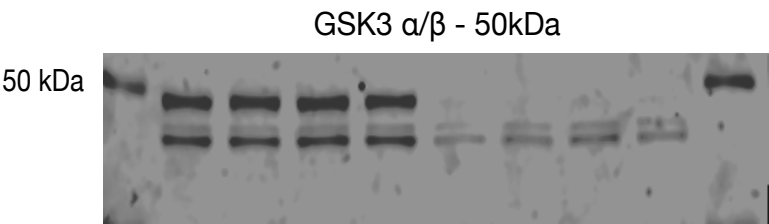

Figure 4S1B (top)

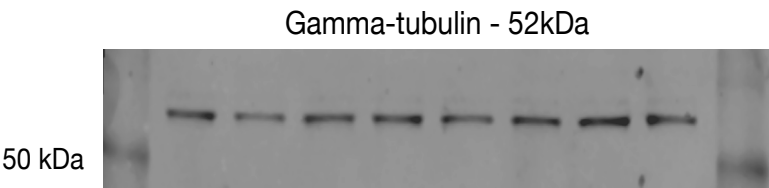

Figure 4S1B (bottom)

Supplement: supp [file elife_poa_e61405_Figure_5_source_data_3.pdf › elife_poa_e61405_Figure_5_source_data_3.pdf]

**A**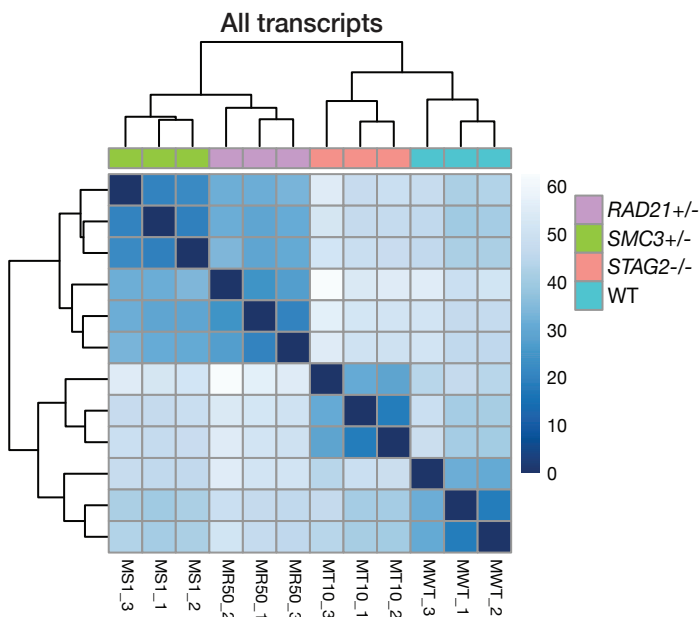**B**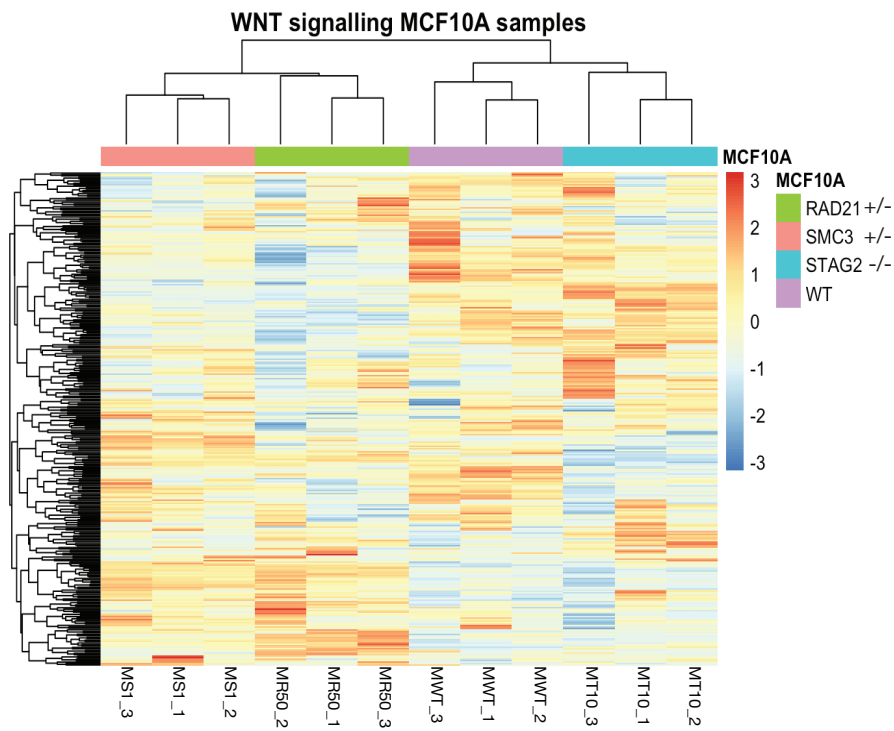

Supplement: supp [file elife_poa_e61405_Figure_6_figure_supplement_1.pdf › elife_poa_e61405_Figure_6_figure_supplement_1.pdf]
